# Supplementary material for: A global food plant dataset for wild silkmoths and hawkmoths and its use in documenting polyphagy of their caterpillars (Lepidoptera: Bombycoidea: Saturniidae, Sphingidae)
Source: Biodivers Data J. 2020 Dec 10;8:e60027. doi: 10.3897/BDJ.8.e60027 (PMC7746661; doi:10.3897/BDJ.8.e60027)
Supplement: Supplementary material 1 — Food plant dataset for worldwide saturniid and sphingid moths (Lepidoptera, Saturniidae, Sphingidae) [file bdj-08-e60027-s001.xlsx]

## Sheet: Description
Column name	Description
Family	Taxonomic family of the moth genus/species
Subfamily	Taxonomic subfamily of the moth genus/species
Tribe	Taxonomic tribe of the moth genus/species
Moth_Genus_name	Genus name
Moth_Species_Name	Species name
Number_PlantGenus	Total number of plant genera known to be eaten in natural environment by caterpillars of this species of moth
Plant_GenusNames	Names of plant genera known to be eaten in natural environment by caterpillars of this species of moth
Number_PlantSpecies	Total number of plant species known to be eaten in natural environments by caterpillars of this species of moth
Plant_SpeciesNames	Names of plant species known to be eaten in natural environments by caterpillars of this species of moth
Number_PlantFamily	Total number of plant families known to be eaten in natural environments by caterpillars of this species of moth
Plant_FamilyNames	Names of plant families known to be eaten in natural environments by caterpillars of this species of moth
Number_PlantOrders	Total number of plant orders known to be eaten in natural environments by caterpillars of this species of moth
Plant_OrderNames	Names of plant orders known to be eaten in natural environments by caterpillars of this species of moth
Number_PlantGenus_Capt	Total number of plant genera known to be eaten in captivity by caterpillars of this species of moth
Plant_GenusNames_Capt	Names of plant genera known to be eaten in captivity by caterpillars of this species of moth
Number_PlantSpecies_Capt	Total number of plant species known to be eaten in captivity by caterpillars of this species of moth
Plant_SpeciesNames_Capt	Names of plant species known to be eaten in captivity by caterpillars of this species of moth
Number_PlantFamily_Capt	Total number of plant families known to be eaten in captivity by caterpillars of this species of moth
Plant_FamilyNames_Capt	Names of plant families known to be eaten in captivity by caterpillars of this species of moth
Number_PlantOrders_Capt	Total number of plant orders known to be eaten in captivity by caterpillars of this species of moth
Plant_OrderNames_Capt	Names of plant orders known to be eaten in captivity by caterpillars of this species of moth

## Sheet: HostPlantDatabase_SAT&SPH
Family	Subfamily	Tribe	Moth_Genus_name	Moth_Species_Name	Number_PlantGenus	Plant_GenusNames	Number_PlantSpecies	Plant_SpeciesNames	Number_PlantFamily	Plant_FamilyNames	Number_PlantOrders	Plant_OrderNames	Number_PlantGenus_Capt	Plant_GenusNames_Capt	Number_PlantSpecies_Capt	Plant_SpeciesNames_Capt	Number_PlantFamily_Capt	Plant_FamilyNames_Capt	Number_PlantOrders_Capt	Plant_OrderNames_Capt
Saturniidae	Saturniinae	Saturniini	Actias	Actias aliena	7	Quercus|Alnus|Betula|Castanea|Fagus|Juglans|Rosa	9	Quercus dentata|Alnus firma|Alnus maritima|Betula platyphylla|Castanea crenata|Fagus crenata|Quercus serrata|Juglans regia|Rosa	4	Betulaceae|Fagaceae|Juglandaceae|Rosaceae	2	Fagales|Rosales	7	Quercus|Alnus|Betula|Castanea|Fagus|Juglans|Rosa	9	Quercus dentata|Alnus firma|Alnus maritima|Betula platyphylla|Castanea crenata|Fagus crenata|Quercus serrata|Juglans regia|Rosa	4	Betulaceae|Fagaceae|Juglandaceae|Rosaceae	2	Fagales|Rosales
Saturniidae	Saturniinae	Saturniini	Actias	Actias artemis	2	Cinnamomum|Acer	3	Cinnamomum camphora|Acer mono|Acer palmatum	2	Sapindaceae|Lauraceae	2	Sapindales|Laurales	11	Betula|Acer|Alnus|Fagus|Quercus|Carya|Juglans|Malus|Prunus|Pyrus|Punica	15	Betula|Acer|Alnus glutinosa|Betula pubescens|Fagus sylvatica|Quercus|Carya|Juglans regia|Malus|Prunus armeniaca|Prunus domestica|Prunus dulcis|Prunus virginiana|Pyrus communis|Punica granatum	6	Sapindaceae|Betulaceae|Juglandaceae|Fagaceae|Rosaceae|Lythraceae	4	Sapindales|Fagales|Rosales|Myrtales
Saturniidae	Saturniinae	Saturniini	Actias	Actias callandra	2	Lagerstroemia|Lannea	2	Lagerstroemia hypoleuca|Lannea coromandelica	2	Lythraceae|Anacardiaceae	2	Myrtales|Sapindales
Saturniidae	Saturniinae	Saturniini	Actias	Actias chrisbrechlinae									1	Pinus	1	Pinus sp.	1	Pinaceae	1	Pinales
Saturniidae	Saturniinae	Saturniini	Actias	Actias dubernardi	1	Pinus	1	Pinus massoniana	1	Pinaceae	1	Pinales	13	Cedrus|Larix|Pinus|Metasequoia|Cinnamomum|Betula|Castanea|Quercus|Juglans|Populus|Salix|Malus|Pyrus	14	Cedrus deodara|Larix decidua|Pinus brutia|Pinus sylvestris|Metasequoia glyptostroboides|Cinnamomum camphora|Betula|Castanea mollissima|Quercus aliena|Juglans regia|Populus|Salix babylonica|Malus pumila|Pyrus bretschneideri	8	Betulaceae|Fagaceae|Pinaceae|Lauraceae|Juglandaceae|Rosaceae|Cupressaceae|Salicaceae	6	Fagales|Pinales|Laurales|Rosales|Cupressales|Malpighiales
Saturniidae	Saturniinae	Saturniini	Actias	Actias dulcilinea	9	Cinnamomum|Alnus|Castanea|Quercus|Sapium|Salix|Malus|Prunus|Pyrus	22	Cinnamomum camphora|Alnus|Alnus cremastogyne|Alnus japonica|Castanea crenata|Castanea mollissima|Quercus|Quercus aliena|Quercus serrata|Sapium sebiferum|Salix babylonica|Salix gracilistyla|Malus|Malus pumila|Prunus|Prunus mume|Prunus persica|Prunus pseudocerasus|Prunus serrulata|Pyrus|Pyrus bretschneideri|	6	Betulaceae|Fagaceae|Lauraceae|Rosaceae|Salicaceae|Euphorbiaceae	4	Fagales|Laurales|Rosales|Malpighiales
Saturniidae	Saturniinae	Saturniini	Actias	Actias gnoma	3	Alnus|Castanea|Quercus	4	Alnus|Castanea crenata|Quercus acutissima|Alnus japonica	2	Betulaceae|Fagaceae	1	Fagales
Saturniidae	Saturniinae	Saturniini	Actias	Actias groenendaeli									1	Liquidambar	1	Liquidambar sp.	1	Altingiaceae	1	Saxifragales
Saturniidae	Saturniinae	Saturniini	Actias	Actias ignescens	1	Crypteronia	1	Crypteronia paniculata	1	Crypteroniaceae	1	Myrtales
Saturniidae	Saturniinae	Saturniini	Actias	Actias isabellae	1	Pinus	2	Pinus nigra|Pinus sylvestris	1	Pinaceae	1	Pinales	5	Pinus|Abies|Cedrus|Larix|Picea	22	Pinus|Pinus nigra|Pinus pinea|Pinus sylvestris|Abies alba|Abies nordmanniana|Cedrus|Cedrus atlantica|Larix decidua|Picea abies|Picea glauca|Picea omorika|Picea pungens|Pinus banksiana|Pinus contorta|Pinus mugo|Pinus pinaster|Pinus ponderosa|Pinus radiata|Pinus strobus|Pinus uncinata|Pinus wallichiana	1	Pinaceae	1	Pinales
Saturniidae	Saturniinae	Saturniini	Actias	Actias isis									7	Altingia|Liquidambar|Ligustrum|Quercus|Crataegus|Rosa|Rhus	7	Altingia chinensis|Liquidambar|Ligustrum|Quercus|Crataegus|Rosa|Rhus typhina	5	Altingiaceae|Rosaceae|Oleaceae|Fagaceae|Anacardiaceae	5	Saxifragales|Rosales|Lamiales|Fagales|Sapindales
Saturniidae	Saturniinae	Saturniini	Actias	Actias luna	26	Liquidambar|Nyssa|Diospyros|Liriodendron|Platanus|Robinia|Alnus|Betula|Carpinus|Corylus|Ostrya|Castanea|Fagus|Quercus|Carya|Juglans|Populus|Salix|Humulus|Amelanchier|Prunus|Ulmus|Tilia|Acer|Aesculus|Larix	41	Liquidambar styraciflua|Nyssa sylvatica|Diospyros virginiana|Liriodendron tulipifera|Platanus|Robinia pseudoacacia|Alnus|Betula|Betula alleghaniensis|Betula papyrifera|Betula pendula|Carpinus betulus|Corylus|Ostrya virginiana|Castanea|Castanea dentata|Fagus|Fagus grandifolia|Quercus|Quercus alba|Quercus rubra|Carya|Carya illinoinensis|Carya porcina|Juglans|Juglans cinerea|Juglans nigra|Populus de…	16	Sapindaceae|Betulaceae|Rosaceae|Juglandaceae|Fagaceae|Ebenaceae|Cannabaceae|Pinaceae|Altingiaceae|Magnoliaceae|Nyssaceae|Platanaceae|Salicaceae|Fabaceae|Malvaceae|Ulmaceae	12	Sapindales|Fagales|Rosales|Ericales|Pinales|Saxifragales|Magnoliales|Cornales|Proteales|Malpighiales|Fabales|Malvales	12	Liquidambar|Betula|Corylus|Quercus|Carya|Juglans|Populus|Prunus|Lythrum|Acer|Mangifera|Rhus	20	Liquidambar formosana|Liquidambar styraciflua|Betula|Betula pendula|Betula pubescens|Corylus|Quercus|Carya|Carya cordiformis|Juglans|Juglans cinerea|Juglans regia|Populus tremula|Prunus|Lythrum salicaria|Acer|Mangifera indica||Carya glabra|Rhus glabra	9	Sapindaceae|Betulaceae|Juglandaceae|Altingiaceae|Lythraceae|Anacardiaceae|Salicaceae|Rosaceae|Fagaceae	6	Sapindales|Fagales|Saxifragales|Myrtales|Malpighiales|Rosales
Saturniidae	Saturniinae	Saturniini	Actias	Actias maenas	12	Adinandra|Canarium|Schima|Gmelina|Turpinia|Cinnamomum|Platanus|Castanea|Quercus|Pterocarya|Salix|Ficus	13	Adinandra dumosa|Canarium|Schima wallichii|Gmelina arborea|Turpinia pomifera|Cinnamomum camphora|Platanus occidentalis|Platanus x hispanica|Castanea mollissima|Quercus aliena|Pterocarya stenoptera|Salix babylonica|Ficus microcarpa	11	Pentaphylacaceae|Burseraceae|Fagaceae|Lauraceae|Moraceae|Lamiaceae|Platanaceae|Juglandaceae|Salicaceae|Theaceae|Staphyleaceae	9	Ericales|Sapindales|Fagales|Laurales|Rosales|Lamiales|Proteales|Malpighiales|Crossosomatales	11	Liquidambar|Castanea|Quercus|Juglans|Rosa|Staphylea|Eucalyptus|Rhus|Toxicodendron|Ligustrum|Betula	16	Liquidambar|Liquidambar styraciflua|Castanea sativa|Quercus|Juglans nigra|Rosa|Staphylea colchica|Eucalyptus gunnii|Rhus|Rhus copallina|Rhus glabra|Rhus typhina|Toxicodendron radicans|Ligustrum ovalifolium|Betula pubescens|Juglans regia	9	Betulaceae|Fagaceae|Myrtaceae|Juglandaceae|Oleaceae|Altingiaceae|Anacardiaceae|Rosaceae|Staphyleaceae	7	Fagales|Myrtales|Lamiales|Saxifragales|Sapindales|Rosales|Crossosomatales
Saturniidae	Saturniinae	Saturniini	Actias	Actias neidhoeferi	2	Abies|Pinus	2	Abies kawakamii|Pinus morrisonicola	1	Pinaceae	1	Pinales
Saturniidae	Saturniinae	Saturniini	Actias	Actias ningpoana	20	Liquidambar|Camptotheca|Fontanesia|Cinnamomum|Alnus|Castanea|Quercus|Juglans|Pterocarya|Sapium|Populus|Salix|Malus|Prunus|Pyrus|Ulmus|Hibiscus|Lagerstroemia|Punica|Acer	32	Liquidambar formosana|Camptotheca acuminata|Fontanesia phillyreoides|Cinnamomum camphora|Alnus sp.|Alnus cremastogyne|Alnus formosana|Alnus japonica|Castanea mollissima|Quercus sp.|Juglans sp.|Juglans regia|Pterocarya stenoptera|Sapium sebiferum|Populus sp.|Salix sp.|Salix babylonica|Malus sp.|Malus asiatica|Malus prunifolia|Malus pumila|Prunus armeniaca|Prunus pseudocerasus|Pyrus bretschneideri|…	14	Sapindaceae|Betulaceae|Nyssaceae|Fagaceae|Lauraceae|Oleaceae|Malvaceae|Juglandaceae|Lythraceae|Altingiaceae|Rosaceae|Salicaceae|Euphorbiaceae|Ulmaceae	10	Sapindales|Fagales|Cornales|Laurales|Lamiales|Malvales|Myrtales|Saxifragales|Rosales|Malpighiales	4	Salix|Schefflera|Quercus|Juglans	5	Salix babylonica|Schefflera octophylla|Quercus ilex|Quercus x turneri|Juglans regia	4	Juglandaceae|Fagaceae|Salicaceae|Araliaceae	3	Fagales|Malpighiales|Apiales
Saturniidae	Saturniinae	Saturniini	Actias	Actias parasinensis									1	Liquidambar	1	Liquidambar styraciflua	1	Altingiaceae	1	Saxifragales
Saturniidae	Saturniinae	Saturniini	Actias	Actias rhodopneuma	7	Camellia|Ilex|Cinnamomum|Castanea|Quercus|Juglans|Salix	7	Camellia oleifera|Ilex chinensis|Cinnamomum camphora|Castanea mollissima|Quercus aliena|Juglans regia|Salix babylonica	6	Theaceae|Fagaceae|Lauraceae|Aquifoliaceae|Juglandaceae|Salicaceae	5	Ericales|Fagales|Laurales|Aquifoliales|Malpighiales	1	Rhus	1	Rhus typhina	1	Anacardiaceae	1	Sapindales
Saturniidae	Saturniinae	Saturniini	Actias	Actias selene	46	Corylus|Malus|Prunus|Mangifera|Pieris|Pyrus|Lyonia|Symplocos|Ligustrum|Persea|Coriaria|Alnus|Betula|Carpinus|Juglans|Bischofia|Glochidion|Salix|Moringa|Hibiscus|Terminalia|Lagerstroemia|Lawsonia|Lannea|Rhus|Azadirachta|Chisocheton|Euodia|Zanthoxylum|Careya|Maesa|Alstonia|Wendlandia|Olea|Vitex|Hydrolea|Cinnamomum|Casuarina|Elaeocarpus|Eriobotrya|Trema|Pterospermum|Melastoma|Osbeckia|Anacardium|Cip…	61	Corylus|Malus domestica|Prunus cerasifera|Mangifera indica|Pieris sp.|Pyrus sp.|Lyonia ovalifolia|Symplocos paniculata|Ligustrum robustum|Persea americana|Persea bombycina|Coriaria nepalensis|Alnus nepalensis|Betula sp.|Betula alnoides|Carpinus bimana|Corylus colurna|Juglans regia|Bischofia javanica|Glochidion velutinum|Salix sp.|Malus sp.|Prunus sp.|Prunus cerasoides|Prunus dulcis|Pyrus pashia|M…	27	Betulaceae|Apocynaceae|Anacardiaceae|Meliaceae|Phyllanthaceae|Lecythidaceae|Casuarinaceae|Lauraceae|Coriariaceae|Elaeocarpaceae|Rosaceae|Rutaceae|Malvaceae|Hydroleaceae|Juglandaceae|Lythraceae|Oleaceae|Ericaceae|Primulaceae|Melastomataceae|Moringaceae|Salicaceae|Symplocaceae|Combretaceae|Cannabaceae|Lamiaceae|Rubiaceae	14	Fagales|Gentianales|Sapindales|Malpighiales|Ericales|Laurales|Cucurbitales|Oxalidales|Rosales|Malvales|Solanales|Myrtales|Lamiales|Brassicales	25	Liquidambar|Ligustrum|Syringa|Alnus|Quercus|Carya|Juglans|Salix|Prunus|Pyrus|Lythrum|Schinus|Ficus|Syzygium|Andromeda|Rhododendron|Coriaria|Crataegus|Malus|Terminalia|Lagerstroemia|Melastoma|Lannea|Malosma|Frangula	39	Liquidambar|Liquidambar styraciflua|Ligustrum|Syringa|Alnus glutinosa|Quercus ilex|Carya|Juglans regia|Salix|Salix babylonica|Prunus cerasus|Prunus laurocerasus|Pyrus|Lythrum salicaria|Schinus terebinthifolius|Ficus benghalensis|Ficus religiosa|Ficus rumphii|Syzygium cumini|Andromeda polifolia|Rhododendron|Coriaria nepalensis|Quercus incana|Salix fragilis|Crataegus|Crataegus monogyna|Malus|Malus …	16	Betulaceae|Ericaceae|Juglandaceae|Coriariaceae|Rosaceae|Moraceae|Rhamnaceae|Lythraceae|Anacardiaceae|Oleaceae|Altingiaceae|Melastomataceae|Fagaceae|Salicaceae|Myrtaceae|Combretaceae	9	Fagales|Ericales|Cucurbitales|Rosales|Myrtales|Sapindales|Lamiales|Saxifragales|Malpighiales
Saturniidae	Saturniinae	Saturniini	Actias	Actias sinensis	15	Cinnamomum|Acer|Liquidambar|Platanus|Betula|Castanea|Quercus|Juglans|Pterocarya|Sapium|Populus|Salix|Malus|Prunus|Hibiscus	16	Cinnamomum camphora|Acer|Liquidambar|Liquidambar formosana|Platanus x hispanica|Betula|Castanea mollissima|Quercus aliena|Juglans regia|Pterocarya stenoptera|Sapium sebiferum|Populus|Salix babylonica|Malus pumila|Prunus pseudocerasus|Hibiscus syriacus	11	Sapindaceae|Betulaceae|Fagaceae|Lauraceae|Malvaceae|Juglandaceae|Altingiaceae|Rosaceae|Platanaceae|Salicaceae|Euphorbiaceae	8	Sapindales|Fagales|Laurales|Malvales|Saxifragales|Rosales|Proteales|Malpighiales	1	Liquidambar	2	Liquidambar styraciflua|Liquidambar formosana	1	Altingiaceae	1	Saxifragales
Saturniidae	Saturniinae	Micragonini	Adafroptilum	Adafroptilum incana	2	Brachystegia|Julbernardia	2	Brachystegia spiciformis|Julbernardia globiflora	1	Fabaceae	1	Fabales
Saturniidae	Ceratocampinae		Adeloneivaia		1	Acacia	1	Acacia sp.	1	Fabaceae	1	Fabales
Saturniidae	Ceratocampinae		Adeloneivaia	Adeloneivaia acuta									1	Acacia	1	Acacia baileyana	1	Fabaceae	1	Fabales
Saturniidae	Ceratocampinae		Adeloneivaia	Adeloneivaia boisduvalii									1	Acacia	1	Acacia dealbata	1	Fabaceae	1	Fabales
Saturniidae	Ceratocampinae		Adeloneivaia	Adeloneivaia catoxantha									1	Acacia	1	Acacia baileyana	1	Fabaceae	1	Fabales
Saturniidae	Ceratocampinae		Adeloneivaia	Adeloneivaia fallax									2	Inga|Wisteria	2	Inga sp.|Wisteria sp.	1	Fabaceae	1	Fabales
Saturniidae	Ceratocampinae		Adeloneivaia	Adeloneivaia isara	1	Lysiloma	3	Lysiloma aurita|Lysiloma divaricata|Lysiloma divaricatum	1	Fabaceae	1	Fabales	2	Acacia|Lysiloma	3	Acacia collinsii|Lysiloma|Lysiloma aurita	1	Fabaceae	1	Fabales
Saturniidae	Ceratocampinae		Adeloneivaia	Adeloneivaia jason	5	Zygia|Inga|Cojoba|Enterolobium|Stryphnodendron	20	Zygia longifolia|Inga sp.|Inga longispica|Inga oerstediana|Inga punctata|Inga sapindoides|Inga semialata|Inga vera|Cojoba valerioi|Enterolobium schomburgkii|Inga calixta|Inga chocoensis|Inga marginata|Inga mortoniana|Inga samanensis|Inga sertulifera|Inga spectabilis|Inga umbellifera|Inga venusta|Stryphnodendron microstachyum	1	Fabaceae	1	Fabales	3	Malus|Inga|Quercus	5	Malus|Inga vera|Quercus agrifolia|Quercus dumosa|Quercus kelloggii	3	Fabaceae|Rosaceae|Fagaceae	3	Fabales|Rosales|Fagales
Saturniidae	Ceratocampinae		Adeloneivaia	Adeloneivaia schubarti	1	Stryphnodendron	1	Stryphnodendron adstringens	1	Fabaceae	1	Fabales	1	Stryphnodendron	1	Stryphnodendron adstringens	1	Fabaceae	1	Fabales
Saturniidae	Ceratocampinae		Adeloneivaia	Adeloneivaia subangulata	2	Acacia|Anadenanthera	3	Acacia bonariensis|Acacia tenuifolia|Anadenanthera peregrina	1	Fabaceae	1	Fabales	1	Salix	1	Salix caprea	1	Salicaceae	1	Malpighiales
Saturniidae	Ceratocampinae		Adeloneivaia	Adeloneivaia wellingi	1	Lysiloma	1	Lysiloma latisiliqua	1	Fabaceae	1	Fabales
Saturniidae	Ceratocampinae		Adelowalkeria	Adelowalkeria flavosignata	4	Machaerium|Mimosa|Crotalaria|Myroxylon	6	Machaerium|Machaerium acutifolium|Machaerium brasiliense|Mimosa|Crotalaria|Myroxylon peruiferum	1	Fabaceae	1	Fabales	1	Machaerium	1	Machaerium acutifolium	1	Fabaceae	1	Fabales
Saturniidae	Ceratocampinae		Adelowalkeria	Adelowalkeria tristygma									5	Robinia|Quercus|Salix|Malus|Prunus	5	Robinia pseudoacacia|Quercus|Salix|Malus|Prunus spinosa	4	Rosaceae|Fagaceae|Fabaceae|Salicaceae	4	Rosales|Fagales|Fabales|Malpighiales
Saturniidae	Hemileucinae	Hemileucini	Adetomeris	Adetomeris erythrops	1	Nothofagus	1	Nothofagus pumilio	1	Nothofagaceae	1	Fagales	4	Fraxinus|Rhamnus|Prunus|Malosma	4	Fraxinus sp.|Rhamnus sp.|Prunus armeniaca|Malosma laurina	4	Oleaceae|Anacardiaceae|Rosaceae|Rhamnaceae	3	Lamiales|Sapindales|Rosales
Saturniidae	Saturniinae	Micragonini	Adrougeriana	Adrougeriana ducorpsi	1	Annona	1	Annona senegalensis	1	Annonaceae	1	Magnoliales
Saturniidae	Saturniinae	Micragonini	Adrougeriana	Adrougeriana nenia	2	Annona|Xylopia	2	Annona senegalensis|Xylopia aethiopica	1	Annonaceae	1	Magnoliales
Saturniidae	Saturniinae	Saturniini	Agapema	Agapema anona	2	Condalia|Rhus	7	Condalia|Condalia ericoides|Condalia spathulata|Condalia correllii|Condalia warnockii|Rhus microphylla|Condalia viridis	2	Rhamnaceae|Anacardiaceae	2	Rosales|Sapindales	1	Condalia	1	Condalia hookeri	1	Rhamnaceae	1	Rosales
Saturniidae	Saturniinae	Saturniini	Agapema	Agapema galbina	1	Condalia	2	Condalia hookeri|Condalia spathulata	1	Rhamnaceae	1	Rosales	1	Condalia	2	Condalia hookeri|Condalia ericoides	1	Rhamnaceae	1	Rosales
Saturniidae	Saturniinae	Saturniini	Agapema	Agapema homogena	4	Ribes|Salix|Ceanothus|Frangula	4	Ribes cereum|Salix exigua|Ceanothus fendleri|Frangula californica	3	Rhamnaceae|Grossulariaceae|Salicaceae	3	Rosales|Saxifragales|Malpighiales	2	Ribes|Frangula	2	Ribes alpinum|Frangula alnus	2	Rhamnaceae|Grossulariaceae	2	Rosales|Saxifragales
Saturniidae	Saturniinae	Saturniini	Agapema	Agapema pelora									1	Condalia	1	Condalia hookeri	1	Rhamnaceae	1	Rosales
Saturniidae	Saturniinae	Saturniini	Agapema	Agapema dentifasciata	1	Condalia	1	Condalia ericoides	1	Rhamnaceae	1	Rosales	1	Condalia	1	Condalia hookeri	1	Rhamnaceae	1	Rosales
Saturniidae	Saturniinae	Saturniini	Agapema	Agapema japonica	33	Prunus|Sassafras|Syringa|Zingiber|Cinnamomum|Castanea|Quercus|Juglans|Cycas|Liquidambar|Corylopsis|Diospyros|Eleutherococcus|Kalopanax|Viburnum|Catalpa|Platanus|Lespedeza|Alnus|Corylus|Pterocarya|Populus|Salix|Morus|Malus|Pyrus|Rosa|Ulmus|Punica|Sarcopyramis|Toxicodendron|Citrus|Ginkgo	55	Prunus laurocerasus|Sassafras randaiense|Syringa vulgaris|Zingiber mioga|Cinnamomum camphora|Castanea crenata|Castanea sativa|Quercus acutissima|Quercus dentata|Quercus mongolica|Quercus serrata|Quercus variabilis|Juglans|Juglans mandshurica|Cycas revoluta|Liquidambar formosana|Corylopsis multiflora|Diospyros kaki|Eleutherococcus ricinifolium|Kalopanax septemlobus|Viburnum opulus|Catalpa bungei|P…	24	Betulaceae|Fagaceae|Bignoniaceae|Lauraceae|Rutaceae|Hamamelidaceae|Cycadaceae|Ebenaceae|Araliaceae|Ginkgoaceae|Juglandaceae|Fabaceae|Altingiaceae|Rosaceae|Moraceae|Platanaceae|Salicaceae|Lythraceae|Melastomataceae|Oleaceae|Anacardiaceae|Ulmaceae|Adoxaceae|Zingiberaceae	16	Fagales|Lamiales|Laurales|Sapindales|Saxifragales|Cycadales|Ericales|Apiales|Ginkgoales|Fabales|Rosales|Proteales|Malpighiales|Myrtales|Dipsacales|Zingiberales	16	Quercus|Crataegus|Prunus|Platanus|Cercis|Carpinus|Castanea|Salix|Malus|Zelkova|Lagerstroemia|Acer|Toxicodendron|Aesculus|Schleichera|Populus	25	Quercus rubra|Crataegus monogyna|Prunus domestica|Platanus|Cercis siliquastrum|Carpinus betulus|Castanea crenata|Castanea japonica|Quercus|Quercus petraea|Salix|Salix babylonica|Crataegus|Malus|Prunus armeniaca|Prunus cerasus|Prunus persica|Prunus virginiana|Zelkova serrata|Lagerstroemia indica|Acer|Toxicodendron vernicifluum|Aesculus hippocastanum|Schleichera oleosa|Populus deltoides	10	Sapindaceae|Betulaceae|Fagaceae|Fabaceae|Rosaceae|Lythraceae|Platanaceae|Salicaceae|Anacardiaceae|Ulmaceae	7	Sapindales|Fagales|Fabales|Rosales|Myrtales|Proteales|Malpighiales
Saturniidae	Agliinae		Aglia	Aglia homora	3	Alnus|Betula|Tilia	3	Alnus cremastogyne|Betula sp.|Tilia sp.	2	Betulaceae|Malvaceae	2	Fagales|Malvales
Saturniidae	Agliinae		Aglia	Aglia japonica	4	Quercus|Alnus|Castanea|Fagus	7	Quercus acutissima|Quercus dentata|Alnus japonica|Castanea crenata|Fagus crenata|Quercus mongolica|Quercus serrata	2	Betulaceae|Fagaceae	1	Fagales
Saturniidae	Agliinae		Aglia	Aglia tau	17	Alnus|Betula|Carpinus|Corylus|Castanea|Fagus|Quercus|Populus|Salix|Crataegus|Malus|Prunus|Pyrus|Sorbus|Ulmus|Tilia|Acer	36	Alnus|Alnus glutinosa|Alnus incana|Betula|Betula pendula|Betula pubescens|Carpinus betulus|Corylus avellana|Castanea|Fagus|Fagus sylvatica|Quercus|Quercus robur|Quercus rubra|Populus|Salix|Salix caprea|Crataegus|Malus domestica|Prunus avium|Prunus spinosa|Pyrus communis|Sorbus aucuparia|Ulmus|Tilia|Tilia cordata|Tilia platyphyllos|Acer pseudoplatanus|Alnus cremastogyne|Alnus orientalis|Corylus he…	7	Sapindaceae|Betulaceae|Fagaceae|Rosaceae|Salicaceae|Malvaceae|Ulmaceae	5	Sapindales|Fagales|Rosales|Malpighiales|Malvales	10	Polygonum|Alnus|Betula|Carpinus|Fagus|Juglans|Salix|Crataegus|Tilia|Acer	13	Polygonum bistorta|Alnus glutinosa|Betula|Carpinus betulus|Fagus|Juglans regia|Salix aurita|Salix caprea|Salix fragilis|Crataegus|Tilia|Acer pseudoplatanus|Betula pendula	8	Sapindaceae|Betulaceae|Rosaceae|Fagaceae|Juglandaceae|Polygonaceae|Salicaceae|Malvaceae	6	Sapindales|Fagales|Rosales|Caryophyllales|Malpighiales|Malvales
Saturniidae	Arsenurinae	Almeidaiini	Almeidaia	Almeidaia aidae	2	Pseudobombax|Eriotheca	2	Pseudobombax longiflorum|Eriotheca gracilipes	1	Malvaceae	1	Malvales
Saturniidae	Ceratocampinae		Anisota	Anisota assimilis	1	Quercus	1	Quercus grisea	1	Fagaceae	1	Fagales	1	Quercus	1	Quercus albocincta	1	Fagaceae	1	Fagales
Saturniidae	Ceratocampinae		Anisota	Anisota consularis	1	Quercus	7	Quercus falcata|Quercus incana|Quercus laevis|Quercus laurifolia|Quercus myrtifolia|Quercus nigra|Quercus virginiana	1	Fagaceae	1	Fagales	1	Quercus	2	Quercus shumardii|Quercus palustris	1	Fagaceae	1	Fagales
Saturniidae	Ceratocampinae		Anisota	Anisota dissimilis									1	Quercus	6	Quercus agrifolia|Quercus chrysolepis|Quercus ilex|Quercus kelloggii|Quercus pubescens|Quercus virginiana	1	Fagaceae	1	Fagales
Saturniidae	Ceratocampinae		Anisota	Anisota finlaysoni	1	Quercus	4	Quercus|Quercus alba|Quercus prinus|Quercus x willdenowiana	1	Fagaceae	1	Fagales	2	Castanea|Quercus	6	Castanea sativa|Quercus alba|Quercus muehlenbergi|Quercus pubescens|Quercus rubra|Quercus palustris	1	Fagaceae	1	Fagales
Saturniidae	Ceratocampinae		Anisota	Anisota leucostygma									1	Quercus	2	Quercus dumosa|Quercus lobata	1	Fagaceae	1	Fagales
Saturniidae	Ceratocampinae		Anisota	Anisota manitobensis	2	Corylus|Quercus	3	Corylus sp.|Quercus sp.|Quercus macrocarpa	2	Betulaceae|Fagaceae	1	Fagales	1	Quercus	1	Quercus macrocarpa	1	Fagaceae	1	Fagales
Saturniidae	Ceratocampinae		Anisota	Anisota oslari	2	Quercus|Acer	8	Quercus kelloggii|Quercus oblongifolia|Quercus turbinella|Quercus velutina|Acer negundo|Acer rubrum|Acer saccharinum|Quercus	2	Sapindaceae|Fagaceae	2	Sapindales|Fagales	1	Quercus	6	Quercus virginiana|Quercus arizonica|Quercus gambelii|Quercus oblongifolia|Quercus palustris|Quercus rubra	1	Fagaceae	1	Fagales
Saturniidae	Ceratocampinae		Anisota	Anisota peigleri	1	Quercus	7	Quercus falcata|Quercus marilandica|Quercus nigra|Quercus palustris|Quercus rubra|Quercus shumardii|Quercus velutina	1	Fagaceae	1	Fagales	2	Castanea|Quercus	3	Castanea sativa|Quercus pubescens|Quercus gambelii	1	Fagaceae	1	Fagales
Saturniidae	Ceratocampinae		Anisota	Anisota senatoria	9	Betula|Corylus|Castanea|Fagus|Quercus|Carya|Rubus|Abelmoschus|Acer	24	Betula|Betula papyrifera|Corylus|Castanea|Castanea dentata|Castanea pumila|Fagus|Quercus|Quercus alba|Quercus bicolor|Quercus coccinea|Quercus ilicifolia|Quercus imbricaria|Quercus macrocarpa|Quercus palustris|Quercus prinoides|Quercus prinus|Quercus rubra|Quercus velutina|Carya|Rubus allegheniensis|Rubus idaeus|Abelmoschus esculentus|Acer	6	Malvaceae|Sapindaceae|Betulaceae|Juglandaceae|Fagaceae|Rosaceae	4	Malvales|Sapindales|Fagales|Rosales	1	Castanea	1	Castanea sativa	1	Fagaceae	1	Fagales
Saturniidae	Ceratocampinae		Anisota	Anisota stigma	6	Zea|Cucumis|Corylus|Castanea|Quercus|Carya	18	Zea mays|Cucumis melo|Corylus|Castanea|Castanea dentata|Castanea mollissima|Castanea pumila|Quercus|Quercus alba|Quercus discolor|Quercus laevis|Quercus michauxii|Quercus rubra|Carya|Quercus falcata|Quercus marilandica|Quercus nigra|Quercus stellata	5	Juglandaceae|Fagaceae|Betulaceae|Cucurbitaceae|Poaceae	3	Fagales|Cucurbitales|Poales	3	Corylus|Castanea|Quercus	8	Corylus avellana|Castanea sativa|Quercus|Quercus pubescens|Quercus nigra|Quercus palustris|Quercus velutina|Quercus virginiana	2	Fagaceae|Betulaceae	1	Fagales
Saturniidae	Ceratocampinae		Anisota	Anisota virginiensis	12	Cornus|Betula|Carpinus|Corylus|Castanea|Fagus|Quercus|Salix|Amelanchier|Prunus|Celtis|Acer	27	Cornus alternifolia|Betula alleghaniensis|Betula papyrifera|Carpinus caroliniana|Corylus|Castanea dentata|Fagus|Fagus grandifolia|Quercus|Quercus alba|Quercus macrocarpa|Quercus nigra|Quercus prinus|Quercus rubra|Quercus stellata|Salix|Amelanchier|Prunus|Celtis occidentalis|Acer|Quercus falcata|Quercus imbricaria|Quercus lyrata|Quercus marilandica|Quercus myrtifolia|Quercus texana|Quercus velutina	7	Sapindaceae|Rosaceae|Betulaceae|Fagaceae|Cannabaceae|Cornaceae|Salicaceae	5	Sapindales|Rosales|Fagales|Cornales|Malpighiales	3	Corylus|Quercus|Castanea	11	Corylus avellana|Quercus|Quercus petraea|Quercus pubescens|Quercus robur|Quercus virginiana|Castanea sativa|Quercus ilex|Quercus texana|Quercus palustris|Quercus velutina	2	Fagaceae|Betulaceae	1	Fagales
Saturniidae	Saturniinae	Saturniini	Antheraea		1	Castanea	1	Castanea sativa	1	Fagaceae	1	Fagales	3	Betula|Quercus|Malus	7	Betula pendula|Quercus|Quercus x turneri|Malus Hillieri|Quercus dilatata|Quercus incana|Quercus semecarpifolia	3	Betulaceae|Rosaceae|Fagaceae	2	Fagales|Rosales
Saturniidae	Saturniinae	Saturniini	Antheraea	Antheraea andamana	1	Ficus	3	Ficus altissima|Ficus arnottiana|Ficus retusa	1	Moraceae	1	Rosales
Saturniidae	Saturniinae	Saturniini	Antheraea	Antheraea assamensis	13	Actinodaphne|Cinnamomum|Litsea|Persea|Magnolia|Platanus|Acacia|Quercus|Michelia|Castanea|Bischofia|Ficus|Ziziphus	26	Actinodaphne macrophylla|Cinnamomum bejolghota|Cinnamomum camphora|Cinnamomum zeylanicum|Litsea cubeba|Litsea monopetala|Litsea salicifolia|Persea americana|Persea bombycina|Magnolia pterocarpa|Magnolia sphenocarpa|Platanus x hispanica|Acacia confusa|Quercus dentata|Quercus glauca|Litsea citrata|Litsea nitida|Persea gamblei|Persea kurzii|Michelia champaca|Michelia oblonga|Castanea|Bischofia javan…	8	Fabaceae|Lauraceae|Phyllanthaceae|Fagaceae|Moraceae|Magnoliaceae|Platanaceae|Rhamnaceae	7	Fabales|Laurales|Malpighiales|Fagales|Rosales|Magnoliales|Proteales	7	Litsea|Quercus|Symplocos|Cinnamomum|Neolitsea|Persea|Michelia	9	Litsea monopetala|Quercus|Quercus robur|Symplocos grandiflora|Cinnamomum bejolghota|Litsea salicifolia|Neolitsea sericea|Persea bombycina|Michelia champaca	4	Lauraceae|Magnoliaceae|Fagaceae|Symplocaceae	4	Laurales|Magnoliales|Fagales|Ericales
Saturniidae	Saturniinae	Saturniini	Antheraea	Antheraea borneensis									2	Carpinus|Quercus	2	Carpinus betulus|Quercus sp.	2	Betulaceae|Fagaceae	1	Fagales
Saturniidae	Saturniinae	Saturniini	Antheraea	Antheraea celebensis									4	Betula|Carpinus|Fagus|Quercus	6	Betula utilis|Carpinus betulus|Fagus sylvatica|Quercus|Quercus robur|Quercus x hispanica	2	Betulaceae|Fagaceae	1	Fagales
Saturniidae	Saturniinae	Saturniini	Antheraea	Antheraea cingalesa	22	Terminalia|Careya|Maesa|Symplocos|Camellia|Alstonia|Wendlandia|Vitex|Hydrolea|Cinnamomum|Persea|Casuarina|Hevea|Elaeocarpus|Eriobotrya|Trema|Pterospermum|Melastoma|Osbeckia|Eucalyptus|Anacardium|Cipadessa	24	Terminalia|Terminalia arjuna|Careya arborea|Maesa lanceolata|Symplocos cochinchinensis|Camellia sinensis|Alstonia scholaris|Wendlandia notoniana|Vitex altissima|Hydrolea zeylanica|Cinnamomum zeylanicum|Persea americana|Casuarina equisetifolia|Hevea brasiliensis|Elaeocarpus serratus|Eriobotrya japonica|Trema orientalis|Pterospermum suberifolium|Terminalia catappa|Melastoma malabathricum|Osbeckia o…	20	Apocynaceae|Anacardiaceae|Theaceae|Lecythidaceae|Casuarinaceae|Lauraceae|Meliaceae|Elaeocarpaceae|Rosaceae|Myrtaceae|Euphorbiaceae|Hydroleaceae|Primulaceae|Melastomataceae|Malvaceae|Symplocaceae|Combretaceae|Cannabaceae|Lamiaceae|Rubiaceae	12	Gentianales|Sapindales|Ericales|Fagales|Laurales|Oxalidales|Rosales|Myrtales|Malpighiales|Solanales|Malvales|Lamiales	3	Quercus|Carpinus|Prunus	4	Quercus sp.|Carpinus betulus|Quercus alba|Prunus domestica	3	Betulaceae|Rosaceae|Fagaceae	2	Fagales|Rosales
Saturniidae	Saturniinae	Saturniini	Antheraea	Antheraea cordifolia									6	Liquidambar|Fraxinus|Betula|Quercus|Crataegus|Prunus	6	Liquidambar|Fraxinus|Betula|Quercus|Crataegus|Prunus	5	Betulaceae|Rosaceae|Oleaceae|Altingiaceae|Fagaceae	4	Fagales|Rosales|Lamiales|Saxifragales
Saturniidae	Saturniinae	Saturniini	Antheraea	Antheraea exspectata									1	Betula	1	Betula utilis	1	Betulaceae	1	Fagales
Saturniidae	Saturniinae	Saturniini	Antheraea	Antheraea formosana	4	Cinnamomum|Lindera|Persea|Quercus	4	Cinnamomum camphora|Lindera megaphylla|Persea thunbergii|Quercus	2	Lauraceae|Fagaceae	2	Laurales|Fagales
Saturniidae	Saturniinae	Saturniini	Antheraea	Antheraea frithi	7	Shorea|Canarium|Cinnamomum|Acacia|Sapium|Salix|Dipterocarpus	9	Shorea robusta|Canarium|Cinnamomum camphora|Acacia confusa|Sapium sebiferum|Salix babylonica|Dipterocarpus alatus|Dipterocarpus zeylanicus|Canarium album	6	Fabaceae|Burseraceae|Lauraceae|Dipterocarpaceae|Salicaceae|Euphorbiaceae	5	Fabales|Sapindales|Laurales|Malvales|Malpighiales	1	Quercus	1	Quercus sp.	1	Fagaceae	1	Fagales
Saturniidae	Saturniinae	Saturniini	Antheraea	Antheraea godmani									1	Quercus	1	Quercus sp.	1	Fagaceae	1	Fagales
Saturniidae	Saturniinae	Saturniini	Antheraea	Antheraea gschwandneri	2	Phyllanthus|Bombax	2	Phyllanthus emblica|Bombax sp.	2	Malvaceae|Phyllanthaceae	2	Malvales|Malpighiales	3	Quercus|Pyracantha|Rosa	3	Quercus sp.|Pyracantha sp.|Rosa sp.	2	Rosaceae|Fagaceae	2	Rosales|Fagales
Saturniidae	Saturniinae	Saturniini	Antheraea	Antheraea halconensis									2	Malus|Pyracantha	2	Malus Hillieri|Pyracantha coccinea	1	Rosaceae	1	Rosales
Saturniidae	Saturniinae	Saturniini	Antheraea	Antheraea helferi	1	Shorea	1	Shorea robusta	1	Dipterocarpaceae	1	Malvales
Saturniidae	Saturniinae	Saturniini	Antheraea	Antheraea imperator	1	Canarium	1	Canarium indicum	1	Burseraceae	1	Sapindales	3	Betula|Lithocarpus|Nephelium	3	Betula utilis|Lithocarpus grandifolius|Nephelium lappaceum	3	Betulaceae|Fagaceae|Sapindaceae	2	Fagales|Sapindales
Saturniidae	Saturniinae	Saturniini	Antheraea	Antheraea jana	2	Canarium|Schleichera	3	Canarium indicum|Canarium vulgare|Schleichera oleosa	2	Burseraceae|Sapindaceae	1	Sapindales	2	Betula|Quercus	3	Betula utilis|Quercus x turneri|Quercus ilex	2	Betulaceae|Fagaceae	1	Fagales
Saturniidae	Saturniinae	Saturniini	Antheraea	Antheraea kelimutuensis									1	Betula	1	Betula sp.	1	Betulaceae	1	Fagales
Saturniidae	Saturniinae	Saturniini	Antheraea	Antheraea korintjiana									1	Quercus	1	Quercus x turneri	1	Fagaceae	1	Fagales
Saturniidae	Saturniinae	Saturniini	Antheraea	Antheraea larissa	1	Shorea	1	Shorea glauca	1	Dipterocarpaceae	1	Malvales	1	Betula	1	Betula utilis	1	Betulaceae	1	Fagales
Saturniidae	Saturniinae	Saturniini	Antheraea	Antheraea meisteri	1	Hopea	1	Hopea odorata	1	Dipterocarpaceae	1	Malvales
Saturniidae	Saturniinae	Saturniini	Antheraea	Antheraea montezuma									1	Quercus	1	Quercus sp.	1	Fagaceae	1	Fagales
Saturniidae	Saturniinae	Saturniini	Antheraea	Antheraea moultoni									1	Glochidion	1	Glochidion littorale	1	Phyllanthaceae	1	Malpighiales
Saturniidae	Saturniinae	Saturniini	Antheraea	Antheraea oculea	2	Quercus|Juglans	3	Quercus emoryi|Quercus oblongifolia|Juglans major	2	Juglandaceae|Fagaceae	1	Fagales	3	Quercus|Salix|Prunus	4	Quercus sp.|Quercus kelloggii|Salix sp.|Prunus sp.	3	Rosaceae|Fagaceae|Salicaceae	3	Rosales|Fagales|Malpighiales
Saturniidae	Saturniinae	Saturniini	Antheraea	Antheraea paphia	37	Dillenia|Barringtonia|Madhuca|Symplocos|Carissa|Canthium|Meyna|Neolamarckia|Tarenna |Gmelina|Tectona|Celastrus|Bauhinia|Chamaecrista|Casuarina|Bridelia|Artocarpus|Ficus|Ziziphus|Bombax|Shorea|Gnidia|Anogeissus|Terminalia|Lagerstroemia|Melastoma|Eucalyptus|Buchanania|Garuga|Cipadessa|Chloroxylon|Dodonaea|Schleichera|Careya|Quercus|Ricinus|Syzygium	66	Dillenia indica|Barringtonia acutangula|Barringtonia racemosa|Madhuca indica|Madhuca longifolia|Symplocos racemosa|Carissa carandas|Carissa edulis|Canthium dicoccum|Meyna grisea|Neolamarckia cadamba|Tarenna asiatica|Gmelina arborea|Tectona grandis|Celastrus paniculata|Bauhinia variegata|Chamaecrista desvauxii|Casuarina sp.|Bridelia stipularis|Artocarpus heterophyllus|Ficus sp.|Ficus benghalensis|…	27	Combretaceae|Moraceae|Lecythidaceae|Fabaceae|Malvaceae|Phyllanthaceae|Anacardiaceae|Rubiaceae|Apocynaceae|Casuarinaceae|Celastraceae|Rutaceae|Meliaceae|Dilleniaceae|Sapindaceae|Myrtaceae|Burseraceae|Lamiaceae|Thymelaeaceae|Lythraceae|Sapotaceae|Melastomataceae|Fagaceae|Euphorbiaceae|Dipterocarpaceae|Symplocaceae|Rhamnaceae	12	Myrtales|Rosales|Ericales|Fabales|Malvales|Malpighiales|Sapindales|Gentianales|Fagales|Celastrales|Dilleniales|Lamiales	16	Anogeissus|Tectona|Dalbergia|Carpinus|Quercus|Morus|Ziziphus|Prunus|Shorea|Terminalia|Careya|Carissa|Fagus|Ricinus|Lagerstroemia|Syzygium	26	Anogeissus latifolia|Tectona grandis|Dalbergia sissoo|Carpinus betulus|Quercus robur|Morus indica|Ziziphus mauritiana|Prunus domestica|Shorea robusta|Terminalia|Terminalia arjuna|Terminalia glabra|Terminalia tomentosa|Careya sphaerica|Carissa|Fagus|Fagus sylvatica|Quercus|Quercus virginiana|Ricinus communis|Ziziphus|Terminalia alata|Terminalia bellirica|Lagerstroemia|Lagerstroemia parviflora|Syzy…	14	Combretaceae|Lecythidaceae|Apocynaceae|Betulaceae|Fabaceae|Fagaceae|Lythraceae|Moraceae|Rosaceae|Euphorbiaceae|Dipterocarpaceae|Myrtaceae|Lamiaceae|Rhamnaceae	9	Myrtales|Ericales|Gentianales|Fagales|Fabales|Rosales|Malpighiales|Malvales|Lamiales
Saturniidae	Saturniinae	Saturniini	Antheraea	Antheraea paukstadtorum									1	Betula	1	Betula utilis	1	Betulaceae	1	Fagales
Saturniidae	Saturniinae	Saturniini	Antheraea	Antheraea pernyi	25	Castanea|Quercus|Vitex|Cinnamomum|Fagus|Lithocarpus|Juglans|Broussonetia|Crataegus|Malus|Aesculus|Larix|Catalpa|Pterocarya|Salix|Daphniphyllum|Madhuca|Cyperus|Betula|Prunus|Pyrus|Dipterocarpus|Canarium|Euodia|Terminalia	42	Castanea crenata|Quercus myrsinifolia|Quercus serrata|Vitex agnus-castus|Cinnamomum camphora|Fagus crenata|Fagus sylvatica|Lithocarpus hancei|Quercus sp.|Quercus acutissima|Quercus aliena|Quercus dentata|Quercus fabri|Quercus glauca|Quercus ilex|Quercus mongolica|Quercus robur|Quercus variabilis|Juglans regia|Broussonetia papyrifera|Crataegus pinnatifida|Malus domestica|Aesculus sp.|Catalpa ovata…	18	Sapindaceae|Betulaceae|Moraceae|Burseraceae|Fagaceae|Bignoniaceae|Lauraceae|Rosaceae|Cyperaceae|Daphniphyllaceae|Dipterocarpaceae|Rutaceae|Juglandaceae|Pinaceae|Sapotaceae|Salicaceae|Combretaceae|Lamiaceae	12	Sapindales|Fagales|Rosales|Lamiales|Laurales|Poales|Saxifragales|Malvales|Pinales|Ericales|Malpighiales|Myrtales	15	Quercus|Betula|Carpinus|Fagus|Salix|Liquidambar|Castanea|Myrica|Maclura|Crataegus|Malus|Prunus|Lythrum|Aesculus|Juglans	44	Quercus petraea|Quercus robur|Betula pendula|Carpinus betulus|Fagus sylvatica|Quercus|Salix cinerea|Liquidambar styraciflua|Betula|Carpinus|Castanea|Castanea sativa|Fagus|Quercus aliena|Quercus bungeana|Quercus castaneifolia|Quercus dentata|Quercus ilex|Quercus kelloggii|Quercus mongolica|Quercus serrata|Myrica esculenta|Salix|Maclura tinctoria|Crataegus|Crataegus monogyna|Malus|Prunus domestica|…	10	Sapindaceae|Betulaceae|Fagaceae|Rosaceae|Juglandaceae|Altingiaceae|Lythraceae|Moraceae|Myricaceae|Salicaceae	6	Sapindales|Fagales|Rosales|Saxifragales|Myrtales|Malpighiales
Saturniidae	Saturniinae	Saturniini	Antheraea	Antheraea perrottetii	3	Ziziphus|Syzygium|Lannea	3	Ziziphus sp.|Syzygium cumini|Lannea coromandelica	3	Anacardiaceae|Myrtaceae|Rhamnaceae	3	Sapindales|Myrtales|Rosales
Saturniidae	Saturniinae	Saturniini	Antheraea	Antheraea platessa									1	Salix	1	Salix caprea	1	Salicaceae	1	Malpighiales
Saturniidae	Saturniinae	Saturniini	Antheraea	Antheraea polyphemus	41	Ribes|Hamamelis|Cornus|Arbutus|Gaylussacia|Vaccinium|Weigela|Fraxinus|Capsicum|Sassafras|Liriodendron|Platanus|Gleditsia|Alnus|Betula|Carpinus|Corylus|Ostrya|Castanea|Fagus|Quercus|Carya|Juglans|Myrica|Populus|Salix|Amelanchier|Crataegus|Cydonia|Malus|Prunus|Pyrus|Rosa|Sorbus|Ulmus|Tilia|Lythrum|Acer|Aesculus|Vitis|Pinus	103	Ribes cynosbati|Ribes rubrum|Ribes sanguineum|Hamamelis virginiana|Cornus alternifolia|Cornus racemosa|Cornus sericea|Arbutus menziesii|Gaylussacia dumosa|Vaccinium|Weigela|Fraxinus|Capsicum annuum|Sassafras albidum|Liriodendron tulipifera|Platanus|Platanus occidentalis|Gleditsia triacanthos|Alnus incana|Alnus rubra|Alnus serrulata|Betula|Betula alleghaniensis|Betula lenta|Betula nigra|Betula pap…	23	Sapindaceae|Betulaceae|Rosaceae|Ericaceae|Solanaceae|Juglandaceae|Fagaceae|Cornaceae|Oleaceae|Fabaceae|Hamamelidaceae|Magnoliaceae|Lythraceae|Myricaceae|Pinaceae|Platanaceae|Salicaceae|Grossulariaceae|Lauraceae|Malvaceae|Ulmaceae|Vitaceae|Caprifoliaceae	18	Sapindales|Fagales|Rosales|Ericales|Solanales|Cornales|Lamiales|Fabales|Saxifragales|Magnoliales|Myrtales|Pinales|Proteales|Malpighiales|Laurales|Malvales|Vitales|Dipsacales	19	Quercus|Liquidambar|Cornus|Baptisia|Wisteria|Betula|Corylus|Castanea|Fagus|Populus|Salix|Crataegus|Malus|Prunus|Acer|Aesculus|Sambucus|Rhamnus|Ulmus	34	Quercus oleoides|Liquidambar|Cornus|Baptisia tinctoria|Wisteria|Betula pendula|Corylus|Castanea mollissima|Castanea sativa|Fagus|Quercus|Quercus palustris|Quercus robur|Populus|Salix|Crataegus|Malus|Prunus domestica|Acer campestre|Acer saccharinum|Aesculus|Betula pubescens|Malus domestica|Sambucus|Betula papyrifera|Betula populifolia|Quercus falcata|Quercus lyrata|Quercus phellos|Quercus stellata…	11	Sapindaceae|Fabaceae|Betulaceae|Fagaceae|Cornaceae|Rosaceae|Altingiaceae|Salicaceae|Rhamnaceae|Adoxaceae|Ulmaceae	8	Sapindales|Fabales|Fagales|Cornales|Rosales|Saxifragales|Malpighiales|Dipsacales
Saturniidae	Saturniinae	Saturniini	Antheraea	Antheraea pratti									1	Quercus	1	Quercus x turneri	1	Fagaceae	1	Fagales
Saturniidae	Saturniinae	Saturniini	Antheraea	Antheraea raffrayi									2	Betula|Salix	2	Betula utilis|Salix caprea	2	Betulaceae|Salicaceae	2	Fagales|Malpighiales
Saturniidae	Saturniinae	Saturniini	Antheraea	Antheraea rosemariae									2	Betula|Quercus	3	Betula sp.|Betula utilis|Quercus sp.	2	Betulaceae|Fagaceae	1	Fagales
Saturniidae	Saturniinae	Saturniini	Antheraea	Antheraea rudloffi	1	Litsea	1	Litsea kurzii	1	Lauraceae	1	Laurales
Saturniidae	Saturniinae	Saturniini	Antheraea	Antheraea rumphii	2	Quercus|Sonneratia	2	Quercus sp.|Sonneratia caseolaris	2	Fagaceae|Lythraceae	2	Fagales|Myrtales
Saturniidae	Saturniinae	Saturniini	Antheraea	Antheraea semperi	1	Diospyros	1	Diospyros kaki	1	Ebenaceae	1	Ericales	1	Quercus	1	Quercus x turneri	1	Fagaceae	1	Fagales
Saturniidae	Saturniinae	Saturniini	Antheraea	Antheraea superba	1	Quercus	1	Quercus acutissima	1	Fagaceae	1	Fagales
Saturniidae	Saturniinae	Saturniini	Antheraea	Antheraea yamamai	11	Corylus|Castanopsis|Quercus|Malus|Mespilus|Pyracantha|Pyrus|Liquidambar|Castanea|Myrica|Prunus	20	Corylus|Castanopsis cuspidata|Quercus acutissima|Quercus ilex|Quercus mongolica|Quercus variabilis|Malus|Mespilus|Pyracantha coccinea|Pyrus|Quercus serrata|Malus pumila|Liquidambar styraciflua|Castanea crenata|Castanea japonica|Quercus|Quercus glauca|Quercus myrsinifolia|Myrica rubra|Prunus	5	Fagaceae|Betulaceae|Altingiaceae|Rosaceae|Myricaceae	3	Fagales|Saxifragales|Rosales	17	Carpinus|Castanea|Quercus|Carya|Morus|Malus|Prunus|Sorbus|Castanopsis|Fagus|Lithocarpus|Salix|Chaenomeles|Crataegus|Cydonia|Mespilus|Photinia	37	Carpinus betulus|Castanea sativa|Quercus|Quercus kelloggii|Quercus robur|Carya|Morus|Malus pumila|Prunus domestica|Sorbus aria|Quercus serrata|Castanopsis cuspidata|Fagus|Fagus sylvatica|Lithocarpus edulis|Quercus acuta|Quercus acutissima|Quercus castaneifolia|Quercus cerris|Quercus cuspidata|Quercus dentata|Quercus gilva|Quercus glauca|Quercus mongolica|Quercus myrsinifolia|Quercus petraea|Querc…	6	Betulaceae|Juglandaceae|Fagaceae|Rosaceae|Moraceae|Salicaceae	3	Fagales|Rosales|Malpighiales
Saturniidae	Saturniinae	Saturniini	Antheraea	Antheraea youngi	1	Cinnamomum	1	Cinnamomum burmannii	1	Lauraceae	1	Laurales	3	Betula|Persea|Mahonia	3	Betula utilis|Persea sp.|Mahonia sp.	3	Betulaceae|Berberidaceae|Lauraceae	3	Fagales|Ranunculales|Laurales
Saturniidae	Saturniinae	Saturniini	Antherina	Antherina suraka	16	Maesa|Polyscias|Mascarenhasia|Nerium|Strophanthus|Ischnolepis|Weinmannia|Eriobotrya|Brassica|Terminalia|Eugenia|Psidium|Mangifera|Schinus|Litchi|Vitis	17	Maesa|Maesa lanceolata|Polyscias multibracteata|Mascarenhasia|Nerium oleander|Strophanthus boivinii|Ischnolepis graminifolia|Weinmannia|Eriobotrya japonica|Brassica|Terminalia catappa|Eugenia|Psidium guajava|Mangifera indica|Schinus molle|Litchi chinensis|Vitis vinifera	11	Brassicaceae|Rosaceae|Myrtaceae|Apocynaceae|Sapindaceae|Primulaceae|Anacardiaceae|Araliaceae|Combretaceae|Vitaceae|Cunoniaceae	9	Brassicales|Rosales|Myrtales|Gentianales|Sapindales|Ericales|Apiales|Vitales|Oxalidales	15	Liquidambar|Fraxinus|Ligustrum|Syringa|Carpinus|Fagus|Quercus|Salix|Crataegus|Malus|Prunus|Rosa|Acer|Rhus|Vitis	26	Liquidambar|Fraxinus pennsylvanica|Ligustrum|Ligustrum japonicum|Ligustrum ovalifolium|Ligustrum sinense|Ligustrum vulgare|Syringa vulgaris|Carpinus betulus|Fagus|Quercus|Salix|Salix babylonica|Salix caprea|Crataegus|Crataegus laevigata|Crataegus monogyna|Malus Hillieri|Malus floribunda|Prunus|Prunus laurocerasus|Rosa|Acer|Acer campestre|Rhus typhina|Vitis vinifera	9	Sapindaceae|Betulaceae|Rosaceae|Fagaceae|Oleaceae|Altingiaceae|Anacardiaceae|Salicaceae|Vitaceae	7	Sapindales|Fagales|Rosales|Lamiales|Saxifragales|Malpighiales|Vitales
Saturniidae	Saturniinae	Attacini	Archaeoattacus	Archaeoattacus edwardsii	9	Leucosceptrum|Persea|Liquidambar|Ilex|Cinnamomum|Betula|Bischofia|Salix|Ficus	9	Leucosceptrum canum|Persea americana|Liquidambar formosana|Ilex chinensis|Cinnamomum camphora|Betula sp.|Bischofia polycarpa|Salix babylonica|Ficus retusa	8	Betulaceae|Phyllanthaceae|Lauraceae|Moraceae|Aquifoliaceae|Lamiaceae|Altingiaceae|Salicaceae	7	Fagales|Malpighiales|Laurales|Rosales|Aquifoliales|Lamiales|Saxifragales	12	Kalmia|Rhododendron|Fraxinus|Ligustrum|Syringa|Sassafras|Populus|Salix|Malus|Prunus|Pyrus|Ailanthus	13	Kalmia latifolia|Rhododendron|Fraxinus|Ligustrum|Syringa vulgaris|Sassafras albidum|Populus|Salix|Malus pumila|Prunus domestica|Prunus virginiana|Pyrus communis|Ailanthus altissima	6	Simaroubaceae|Oleaceae|Ericaceae|Rosaceae|Salicaceae|Lauraceae	6	Sapindales|Lamiales|Ericales|Rosales|Malpighiales|Laurales
Saturniidae	Saturniinae	Attacini	Archaeoattacus	Archaeoattacus staudingeri									3	Ligustrum|Syringa|Prunus	3	Ligustrum ovalifolium|Syringa sp.|Prunus sp.	2	Oleaceae|Rosaceae	2	Lamiales|Rosales
Saturniidae	Saturniinae	Saturniini	Argema	Argema mimosae	5	Liquidambar|Mimosa|Spirostachys|Sclerocarya|Commiphora	5	Liquidambar styraciflua|Mimosa|Spirostachys africana|Sclerocarya birrea|Commiphora mollis	5	Burseraceae|Altingiaceae|Fabaceae|Anacardiaceae|Euphorbiaceae	4	Sapindales|Saxifragales|Fabales|Malpighiales	7	Liquidambar|Juglans|Eucalyptus|Malosma|Rhus|Schinus|Sclerocarya	10	Liquidambar|Liquidambar styraciflua|Juglans regia|Eucalyptus|Eucalyptus gunnii|Malosma laurina|Rhus typhina|Schinus molle|Schinus terebinthifolius|Sclerocarya birrea	4	Myrtaceae|Juglandaceae|Altingiaceae|Anacardiaceae	4	Myrtales|Fagales|Saxifragales|Sapindales
Saturniidae	Saturniinae	Saturniini	Argema	Argema mittrei	4	Uapaca|Weinmannia|Eucalyptus|Eugenia	4	Uapaca|Weinmannia eriocampa|Eucalyptus|Eugenia emirinensis	3	Myrtaceae|Phyllanthaceae|Cunoniaceae	3	Myrtales|Malpighiales|Oxalidales	10	Liquidambar|Mimosa|Eucalyptus|Eugenia|Malosma|Pistacia|Rhus|Schinus|Sclerocarya|Toxicodendron	12	Liquidambar styraciflua|Mimosa|Eucalyptus gunnii|Eugenia emirinensis|Malosma laurina|Pistacia lentiscus|Rhus copallina|Rhus typhina|Schinus molle|Schinus terebinthifolius|Sclerocarya birrea|Toxicodendron pubescens	4	Myrtaceae|Altingiaceae|Anacardiaceae|Fabaceae	4	Myrtales|Saxifragales|Sapindales|Fabales
Saturniidae	Arsenurinae	Arsenurini	Arsenura		1	Curatella	1	Curatella americana	1	Dilleniaceae	1	Dilleniales
Saturniidae	Arsenurinae	Arsenurini	Arsenura	Arsenura angulatus									1	Luehea	1	Luehea paniculata	1	Malvaceae	1	Malvales
Saturniidae	Arsenurinae	Arsenurini	Arsenura	Arsenura arianae	6	Annona|Goethalsia|Guazuma|Heliocarpus|Luehea|Pachira	7	Annona rensoniana|Goethalsia meiantha|Guazuma ulmifolia|Heliocarpus americanus|Heliocarpus appendiculatus|Luehea seemannii|Pachira quinata	2	Annonaceae|Malvaceae	2	Magnoliales|Malvales
Saturniidae	Arsenurinae	Arsenurini	Arsenura	Arsenura armida	13	Annona|Rollinia|Erythrina|Bombax|Ceiba|Chorisia|Pachira|Pseudobombax|Guazuma|Sterculia|Theobroma|Heliocarpus|Luehea	21	Annona|Annona montana|Rollinia longifolia|Rollinia membranacea|Rollinia mucosa|Erythrina fusca|Bombax|Bombax ceiba|Ceiba pentandra|Chorisia speciosa|Pachira aquatica|Pachira quinata|Pseudobombax ellipticum|Guazuma ulmifolia|Sterculia excelsa|Theobroma|Theobroma cacao|Heliocarpus americanus|Heliocarpus appendiculatus|Luehea candida|Luehea divaricata	3	Annonaceae|Malvaceae|Fabaceae	3	Magnoliales|Malvales|Fabales	3	Luehea|Ceiba|Chorisia	3	Luehea sp.|Ceiba insignis|Chorisia speciosa	1	Malvaceae	1	Malvales
Saturniidae	Arsenurinae	Arsenurini	Arsenura	Arsenura aspasia	5	Myrsine|Lychnophora|Vernonanthura|Luehea|Tibouchina	5	Myrsine umbellata|Lychnophora sp.|Vernonanthura diffusa|Luehea sp.|Tibouchina sp.	4	Malvaceae|Asteraceae|Primulaceae|Melastomataceae	4	Malvales|Asterales|Ericales|Myrtales
Saturniidae	Arsenurinae	Arsenurini	Arsenura	Arsenura batesii	16	Pachira|Pseudobombax|Quararibea|Byttneria|Guazuma|Helicteres|Apeiba|Heliocarpus|Luehea|Mortoniodendron|Triumfetta|Goethalsia|Malvaviscus|Theobroma|Trichospermum|Waltheria	26	Pachira aquatica|Pseudobombax septenatum|Quararibea funebris|Byttneria catalpifolia|Guazuma ulmifolia|Helicteres baruensis|Helicteres guazumifolia|Apeiba tibourbou|Heliocarpus americanus|Luehea candida|Luehea speciosa|Mortoniodendron guatamalense|Triumfetta lappula|Apeiba membranacea|Goethalsia meiantha|Heliocarpus appendiculatus|Luehea seemannii|Malvaviscus palmanus|Mortoniodendron costaricense|…	1	Malvaceae	1	Malvales	1	Tilia	1	Tilia platyphyllos	1	Malvaceae	1	Malvales
Saturniidae	Arsenurinae	Arsenurini	Arsenura	Arsenura biundulata	2	Chorisia|Luehea	2	Chorisia speciosa|Luehea divaricata	1	Malvaceae	1	Malvales
Saturniidae	Arsenurinae	Arsenurini	Arsenura	Arsenura drucei	8	Pachira|Spirotheca|Malvaviscus|Theobroma|Apeiba|Helicteres|Quararibea|Trichospermum	10	Pachira aquatica|Spirotheca rosea|Malvaviscus|Malvaviscus arboreus|Theobroma angustifolium|Apeiba tibourbou|Helicteres guazumifolia|Malvaviscus palmanus|Quararibea funebris|Trichospermum grewiifolium	1	Malvaceae	1	Malvales
Saturniidae	Arsenurinae	Arsenurini	Arsenura	Arsenura paraorbignyana									1	Tilia	1	Tilia cordata	1	Malvaceae	1	Malvales
Saturniidae	Arsenurinae	Arsenurini	Arsenura	Arsenura polyodonta									1	Chorisia	1	Chorisia speciosa	1	Malvaceae	1	Malvales
Saturniidae	Arsenurinae	Arsenurini	Arsenura	Arsenura rebeli									1	Tilia	1	Tilia sp.	1	Malvaceae	1	Malvales
Saturniidae	Arsenurinae	Arsenurini	Arsenura	Arsenura sylla	3	Hirtella|Luehea|Calycophyllum	3	Hirtella racemosa|Luehea candida|Calycophyllum candidissimum	3	Rubiaceae|Chrysobalanaceae|Malvaceae	3	Gentianales|Malpighiales|Malvales
Saturniidae	Arsenurinae	Arsenurini	Arsenura	Arsenura xanthopus	1	Urena	1	Urena sinuata	1	Malvaceae	1	Malvales
Saturniidae	Saturniinae	Bunaeini	Athletes	Athletes albicans	1	Manihot	1	Manihot esculenta	1	Euphorbiaceae	1	Malpighiales
Saturniidae	Saturniinae	Bunaeini	Athletes	Athletes ethra	2	Eucalyptus|Julbernardia	2	Eucalyptus|Julbernardia paniculata	2	Myrtaceae|Fabaceae	2	Myrtales|Fabales
Saturniidae	Saturniinae	Bunaeini	Athletes	Athletes gigas	3	Julbernardia|Mimosa|Acacia	3	Julbernardia paniculata|Mimosa sp.|Acacia xanthophloea	1	Fabaceae	1	Fabales	1	Cercis	1	Cercis siliquastrum	1	Fabaceae	1	Fabales
Saturniidae	Saturniinae	Bunaeini	Athletes	Athletes semialba	4	Brachystegia|Cassia|Julbernardia|Acacia	5	Brachystegia spiciformis|Cassia|Julbernardia globiflora|Julbernardia paniculata|Acacia	1	Fabaceae	1	Fabales
Saturniidae	Saturniinae	Attacini	Attacus	Attacus atlas	103	Dillenia|Liquidambar|Barringtonia|Ardisia|Embelia|Maesa|Symplocos|Schima|Camellia|Schefflera|Pittosporum|Ilex|Artemisia|Scaevola|Lonicera|Alstonia|Fagraea|Cinchona|Coffea|Meyna|Mussaenda|Nauclea|Neolamarckia|Uncaria|Vangueria|Avicennia|Spathodea|Leucosceptrum|Paulownia|Clerodendrum|Gmelina|Lantana|Stachytarpheta|Vitex|Ipomoea|Setaria|Musa|Curcuma|Elettaria|Etlingera|Cinnamomum|Litsea|Persea|Annon…	153	Dillenia indica|Dillenia pentagyna|Dillenia sumatrana|Liquidambar formosana|Barringtonia asiatica|Ardisia sp.|Ardisia sieboldii|Embelia robusta|Maesa lanceolata|Maesa ramentacea|Symplocos sp.|Symplocos paniculata|Schima crenata|Schima noronhae|Camellia oleifera|Camellia sinensis|Schefflera octophylla|Pittosporum illicioides|Pittosporum tobira|Ilex asprella|Ilex chinensis|Artemisia vulgaris|Scaevo…	53	Fabaceae|Euphorbiaceae|Apocynaceae|Anacardiaceae|Annonaceae|Primulaceae|Asteraceae|Oxalidaceae|Acanthaceae|Lecythidaceae|Berberidaceae|Betulaceae|Phyllanthaceae|Simaroubaceae|Rhizophoraceae|Theaceae|Burseraceae|Malvaceae|Rubiaceae|Lauraceae|Rutaceae|Lamiaceae|Melastomataceae|Crypteroniaceae|Zingiberaceae|Dilleniaceae|Myrtaceae|Gentianaceae|Moraceae|Aquifoliaceae|Convolvulaceae|Lythraceae|Verbenac…	24	Fabales|Malpighiales|Gentianales|Sapindales|Magnoliales|Ericales|Asterales|Oxalidales|Lamiales|Ranunculales|Fagales|Malvales|Laurales|Myrtales|Zingiberales|Dilleniales|Rosales|Aquifoliales|Solanales|Saxifragales|Dipsacales|Piperales|Apiales|Poales	22	Rhododendron|Barringtonia|Schefflera|Ligustrum|Syringa|Cinnamomum|Berberis|Carpinus|Quercus|Populus|Salix|Malus|Prunus|Pyrus|Rosa|Hibiscus|Tilia|Psidium|Ailanthus|Kalmia|Fraxinus|Sassafras	34	Rhododendron|Barringtonia asiatica|Schefflera octophylla|Ligustrum|Ligustrum ovalifolium|Ligustrum vulgare|Syringa|Cinnamomum camphora|Berberis|Berberis vulgaris|Carpinus betulus|Quercus|Quercus ilex|Quercus robur|Populus|Salix|Salix cinerea|Malus|Prunus domestica|Prunus laurocerasus|Prunus persica|Prunus spinosa|Prunus virginiana|Pyrus communis|Rosa|Hibiscus|Tilia|Psidium guajava|Ailanthus altis…	13	Simaroubaceae|Lecythidaceae|Berberidaceae|Betulaceae|Lauraceae|Oleaceae|Malvaceae|Ericaceae|Rosaceae|Salicaceae|Myrtaceae|Fagaceae|Araliaceae	11	Sapindales|Ericales|Ranunculales|Fagales|Laurales|Lamiales|Malvales|Rosales|Malpighiales|Myrtales|Apiales
Saturniidae	Saturniinae	Attacini	Attacus	Attacus caesar	9	Caryodaphnopsis|Persea|Annona|Cananga|Erythrina|Artocarpus|Sandoricum|Swietenia|Citrus	10	Caryodaphnopsis tonkinensis|Persea americana|Annona muricata|Annona squamosa|Cananga odorata|Erythrina|Artocarpus heterophyllus|Sandoricum koetjape|Swietenia mahagoni|Citrus	6	Annonaceae|Moraceae|Lauraceae|Rutaceae|Fabaceae|Meliaceae	5	Magnoliales|Rosales|Laurales|Sapindales|Fabales	7	Ligustrum|Syringa|Magnolia|Myrica|Salix|Prunus|Citrus	9	Ligustrum ovalifolium|Ligustrum vulgare|Syringa vulgaris|Magnolia virginiana|Myrica cerifera|Salix|Salix discolor|Prunus laurocerasus|Citrus	6	Rutaceae|Oleaceae|Magnoliaceae|Myricaceae|Rosaceae|Salicaceae	6	Sapindales|Lamiales|Magnoliales|Fagales|Rosales|Malpighiales
Saturniidae	Saturniinae	Attacini	Attacus	Attacus crameri	4	Polyscias|Callicarpa|Carallia|Duabanga	4	Polyscias nodosa|Callicarpa pentandra|Carallia brachiata|Duabanga moluccana	4	Lamiaceae|Rhizophoraceae|Lythraceae|Araliaceae	4	Lamiales|Malpighiales|Myrtales|Apiales	3	Ligustrum|Syringa|Psidium	3	Ligustrum ovalifolium|Syringa vulgaris|Psidium guajava	2	Oleaceae|Myrtaceae	2	Lamiales|Myrtales
Saturniidae	Saturniinae	Attacini	Attacus	Attacus dohertyi	2	Persea|Annona	2	Persea americana|Annona muricata	2	Annonaceae|Lauraceae	2	Magnoliales|Laurales	3	Ligustrum|Syringa|Ailanthus	4	Ligustrum ovalifolium|Ligustrum vulgare|Syringa vulgaris|Ailanthus altissima	2	Simaroubaceae|Oleaceae	2	Sapindales|Lamiales
Saturniidae	Saturniinae	Attacini	Attacus	Attacus erebus	1	Sandoricum	1	Sandoricum koetjape	1	Meliaceae	1	Sapindales	2	Ligustrum|Syringa	2	Ligustrum ovalifolium|Syringa sp.	1	Oleaceae	1	Lamiales
Saturniidae	Saturniinae	Attacini	Attacus	Attacus inopinatus									2	Ligustrum|Syringa	2	Ligustrum ovalifolium|Syringa sp.	1	Oleaceae	1	Lamiales
Saturniidae	Saturniinae	Attacini	Attacus	Attacus intermedius									2	Ligustrum|Syringa	2	Ligustrum ovalifolium|Syringa vulgaris	1	Oleaceae	1	Lamiales
Saturniidae	Saturniinae	Attacini	Attacus	Attacus lemairei									1	Syringa	1	Syringa vulgaris	1	Oleaceae	1	Lamiales
Saturniidae	Saturniinae	Attacini	Attacus	Attacus lorquinii	12	Chrysophyllum|Schefflera|Heliconia|Persea|Annona|Cananga|Artocarpus|Theobroma|Psidium|Sandoricum|Citrus|Mangifera	14	Chrysophyllum|Schefflera arboricola|Heliconia|Persea americana|Annona muricata|Annona squamosa|Cananga odorata|Artocarpus heterophyllus|Theobroma cacao|Psidium|Psidium guajava|Sandoricum koetjape|Citrus|Mangifera indica	11	Annonaceae|Moraceae|Sapotaceae|Rutaceae|Heliconiaceae|Anacardiaceae|Lauraceae|Myrtaceae|Meliaceae|Araliaceae|Malvaceae	9	Magnoliales|Rosales|Ericales|Sapindales|Zingiberales|Laurales|Myrtales|Apiales|Malvales	9	Fraxinus|Ligustrum|Syringa|Persea|Magnolia|Quercus|Myrica|Salix|Prunus	11	Fraxinus|Ligustrum|Ligustrum ovalifolium|Syringa vulgaris|Persea borbonia|Magnolia virginiana|Quercus glauca|Myrica cerifera|Salix|Salix alba|Prunus laurocerasus	7	Oleaceae|Magnoliaceae|Myricaceae|Lauraceae|Rosaceae|Fagaceae|Salicaceae	6	Lamiales|Magnoliales|Fagales|Laurales|Rosales|Malpighiales
Saturniidae	Saturniinae	Attacini	Attacus	Attacus mcmulleni	4	Vitex|Rhizophora|Crypteronia|Zanthoxylum	5	Vitex trifolia|Rhizophora apiculata|Rhizophora mucronata|Crypteronia paniculata|Zanthoxylum	4	Crypteroniaceae|Rhizophoraceae|Lamiaceae|Rutaceae	4	Myrtales|Malpighiales|Lamiales|Sapindales
Saturniidae	Saturniinae	Attacini	Attacus	Attacus paraliae									4	Ligustrum|Syringa|Prunus|Psidium	4	Ligustrum ovalifolium|Syringa vulgaris|Prunus laurocerasus|Psidium guajava	3	Oleaceae|Rosaceae|Myrtaceae	3	Lamiales|Rosales|Myrtales
Saturniidae	Saturniinae	Attacini	Attacus	Attacus selayarensis									1	Syringa	1	Syringa vulgaris	1	Oleaceae	1	Lamiales
Saturniidae	Saturniinae	Attacini	Attacus	Attacus suparmani									2	Ligustrum|Psidium	2	Ligustrum ovalifolium|Psidium guajava	2	Oleaceae|Myrtaceae	2	Lamiales|Myrtales
Saturniidae	Saturniinae	Attacini	Attacus	Attacus taprobanis	28	Embelia|Cinnamomum|Careya|Maesa|Symplocos|Alstonia|Holarrhena|Mitragyna|Wendlandia|Ocimum|Vitex|Hydrolea|Persea|Samanea|Casuarina|Elaeocarpus|Eriobotrya|Trema|Pterospermum|Terminalia|Lagerstroemia|Melastoma|Memecylon|Osbeckia|Anacardium|Aglaia|Cipadessa|Swietenia	30	Embelia acutipetala|Cinnamomum zeylanicum|Careya arborea|Embelia basaal|Maesa lanceolata|Symplocos cochinchinensis|Alstonia scholaris|Holarrhena pubescens|Mitragyna parviflora|Wendlandia notoniana|Ocimum|Vitex altissima|Hydrolea zeylanica|Persea americana|Samanea saman|Casuarina equisetifolia|Elaeocarpus serratus|Eriobotrya japonica|Trema orientalis|Pterospermum suberifolium|Terminalia catappa|La…	19	Meliaceae|Apocynaceae|Anacardiaceae|Lecythidaceae|Casuarinaceae|Lauraceae|Elaeocarpaceae|Primulaceae|Rosaceae|Hydroleaceae|Lythraceae|Melastomataceae|Rubiaceae|Lamiaceae|Malvaceae|Fabaceae|Symplocaceae|Combretaceae|Cannabaceae	12	Sapindales|Gentianales|Ericales|Fagales|Laurales|Oxalidales|Rosales|Solanales|Myrtales|Lamiales|Malvales|Fabales	5	Ligustrum|Embelia|Berberis|Ficus|Aglaia	8	Ligustrum|Ligustrum olivacea|Ligustrum ovalifolium|Ligustrum vulgare|Embelia acutipetala|Berberis vulgaris|Ficus carica|Aglaia roxburghiana	5	Meliaceae|Berberidaceae|Primulaceae|Moraceae|Oleaceae	5	Sapindales|Ranunculales|Ericales|Rosales|Lamiales
Saturniidae	Saturniinae	Attacini	Attacus	Attacus wardi	1	Croton	1	Croton habrophyllus	1	Euphorbiaceae	1	Malpighiales	1	Homalanthus	1	Homalanthus novoguineensis	1	Euphorbiaceae	1	Malpighiales
Saturniidae	Saturniinae	Bunaeini	Aurivillius	Aurivillius arata	1	Parkia	1	Parkia biglobosa	1	Fabaceae	1	Fabales
Saturniidae	Saturniinae	Bunaeini	Aurivillius	Aurivillius fusca	4	Peltophorum|Albizia|Newtonia|Parkia	5	Peltophorum africanum|Albizia adianthifolia|Newtonia buchananii|Newtonia hildebrandtii|Parkia	1	Fabaceae	1	Fabales	3	Acacia|Calliandra|Salix	3	Acacia baileyana|Calliandra haemoatocephala|Salix sp.	2	Fabaceae|Salicaceae	2	Fabales|Malpighiales
Saturniidae	Saturniinae	Bunaeini	Aurivillius	Aurivillius triramis	1	Albizia	1	Albizia sp.	1	Fabaceae	1	Fabales	1	Acacia	1	Acacia baileyana	1	Fabaceae	1	Fabales
Saturniidae	Saturniinae	Saturniini	Austrocaligula	Austrocaligula carnea	1	Amyema	2	Amyema sp.|Amyema miquelii	1	Loranthaceae	1	Santalales
Saturniidae	Saturniinae	Saturniini	Austrocaligula	Austrocaligula engaea	1	Amyema	1	Amyema sp.	1	Loranthaceae	1	Santalales
Saturniidae	Saturniinae	Saturniini	Austrocaligula	Austrocaligula eucalypti	17	Liquidambar|Aegiceras|Olea|Platanus|Betula|Malus|Prunus|Ulmus|Angophora|Eucalyptus|Eugenia|Lophostemon|Tristania|Tristaniopsis|Schinus|Geijera|Podocarpus	42	Liquidambar|Aegiceras fragrans|Olea paniculata|Platanus|Betula|Betula pendula|Betula pubescens|Malus|Prunus|Prunus armeniaca|Prunus persica|Ulmus|Angophora|Eucalyptus|Eucalyptus blakelyi|Eucalyptus botryoides|Eucalyptus bridgesiana|Eucalyptus cinerea|Eucalyptus delegatensis|Eucalyptus eugenioides|Eucalyptus fastigiata|Eucalyptus globulus|Eucalyptus leucoxylon|Eucalyptus macarthurii|Eucalyptus mac…	11	Primulaceae|Myrtaceae|Betulaceae|Rutaceae|Altingiaceae|Rosaceae|Oleaceae|Platanaceae|Podocarpaceae|Anacardiaceae|Ulmaceae	9	Ericales|Myrtales|Fagales|Sapindales|Saxifragales|Rosales|Lamiales|Proteales|Araucariales	3	Eucalyptus|Pinus|Populus	3	Eucalyptus gunnii|Pinus radiata|Populus sp.	3	Myrtaceae|Pinaceae|Salicaceae	3	Myrtales|Pinales|Malpighiales
Saturniidae	Saturniinae	Saturniini	Austrocaligula	Austrocaligula helena	3	Banksia|Betula|Eucalyptus	10	Banksia marginata|Betula|Eucalyptus|Eucalyptus baxteri|Eucalyptus delegatensis|Eucalyptus ficifolia|Eucalyptus nitens|Eucalyptus obliqua|Eucalyptus regnans|Eucalyptus viminalis	3	Proteaceae|Betulaceae|Myrtaceae	3	Proteales|Fagales|Myrtales	2	Quercus|Eucalyptus	3	Quercus robur|Eucalyptus odorata|Eucalyptus viminalis	2	Myrtaceae|Fagaceae	2	Myrtales|Fagales
Saturniidae	Saturniinae	Saturniini	Austrocaligula	Austrocaligula loranthi	1	Amyema	4	Amyema|Amyema miquelii|Amyema pendula|Amyema quandang	1	Loranthaceae	1	Santalales
Saturniidae	Hemileucinae	Hemileucini	Automerella	Automerella flexuosa									5	Ligustrum|Laburnum|Robinia|Fagus|Quercus	6	Ligustrum|Laburnum anagyroides|Robinia pseudoacacia|Fagus sylvatica|Quercus ilex|Quercus robur	3	Fagaceae|Fabaceae|Oleaceae	3	Fagales|Fabales|Lamiales
Saturniidae	Hemileucinae	Hemileucini	Automerina	Automerina auletes									3	Salix|Mangifera|Protium	3	Salix sp.|Mangifera indica|Protium heptaphyllum	3	Anacardiaceae|Burseraceae|Salicaceae	2	Sapindales|Malpighiales
Saturniidae	Hemileucinae	Hemileucini	Automerina	Automerina cypria	1	Theobroma	1	Theobroma cacao	1	Malvaceae	1	Malvales
Saturniidae	Hemileucinae	Hemileucini	Automerina	Automerina vala	1	Theobroma	1	Theobroma cacao	1	Malvaceae	1	Malvales
Saturniidae	Hemileucinae	Hemileucini	Automeris		36	Manilkara|Ilex|Vernonanthura|Lonicera|Coffea|Guettarda|Tecoma|Jasminum|Solanum|Gladiolus|Iris|Saccharum|Musa|Nectandra|Magnolia|Cassia|Senna|Tamarindus|Pithecellobium|Canavalia|Desmodium|Erythrina|Gliricidia|Machaerium|Ormosia|Wisteria|Ricinus|Salix|Malus|Rosa|Trema|Terminalia|Lagerstroemia|Eucalyptus|Psidium|Mangifera	45	Manilkara zapota|Ilex paraguariensis|Vernonanthura brasiliana|Lonicera periclymenum|Coffea sp.|Guettarda macrosperma|Tecoma sp.|Jasminum angustifolium|Jasminum azoricum|Jasminum humile|Jasminum officinale|Jasminum sambac|Solanum paniculatum|Solanum tuberosum|Gladiolus|Iris|Saccharum officinarum|Musa sapientum|Nectandra|Nectandra reticulata|Magnolia grandiflora|Cassia fistula|Senna siamea|Tamarind…	22	Fabaceae|Rubiaceae|Myrtaceae|Iridaceae|Aquifoliaceae|Oleaceae|Lythraceae|Caprifoliaceae|Magnoliaceae|Rosaceae|Anacardiaceae|Sapotaceae|Musaceae|Lauraceae|Euphorbiaceae|Poaceae|Salicaceae|Solanaceae|Bignoniaceae|Combretaceae|Cannabaceae|Asteraceae	17	Fabales|Gentianales|Myrtales|Asparagales|Aquifoliales|Lamiales|Dipsacales|Magnoliales|Rosales|Sapindales|Ericales|Zingiberales|Laurales|Malpighiales|Poales|Solanales|Asterales	2	Diospyros|Olea	2	Diospyros kaki|Olea europaea	2	Ebenaceae|Oleaceae	2	Ericales|Lamiales
Saturniidae	Hemileucinae	Hemileucini	Automeris	Automeris ahuitzotli									2	Acacia|Robinia	2	Acacia baileyana|Robinia pseudoacacia	1	Fabaceae	1	Fabales
Saturniidae	Hemileucinae	Hemileucini	Automeris	Automeris amanda	2	Piptadenia|Schinus	2	Piptadenia sp.|Schinus sp.	2	Fabaceae|Anacardiaceae	2	Fabales|Sapindales	1	Geoffroea	1	Geoffroea decorticans	1	Fabaceae	1	Fabales
Saturniidae	Hemileucinae	Hemileucini	Automeris	Automeris amoena	2	Erythrina|Ouratea	2	Erythrina velutina|Ouratea acuminata	2	Fabaceae|Ochnaceae	2	Fabales|Malpighiales
Saturniidae	Hemileucinae	Hemileucini	Automeris	Automeris anikmeisterae	63	Guatteria|Oxandra|Rochefortia|Protium|Tetragastris|Calophyllum|Hirtella|Licania|Clethra|Garcinia|Symphonia|Rourea|Dichapetalum|Vaccinium|Erythroxylum|Acalypha|Acidoton|Sapium|Cynometra|Inga|Lonchocarpus|Machaerium|Senna|Tachigali|Zygia|Quercus|Heliconia|Lozania|Vitex|Ocotea|Hiraea|Tetrapterys|Hylaeanthe|Guarea|Abuta|Brosimum|Ficus|Naucleopsis|Pseudolmedia|Sorocea|Cespedesia|Ouratea|Heisteria|Hier…	82	Guatteria tonduzii|Oxandra venezuelana|Rochefortia lundellii|Protium schippii|Tetragastris panamensis|Calophyllum brasiliense|Hirtella media|Hirtella racemosa|Hirtella triandra|Licania hypoleuca|Licania riverae|Clethra lanata|Garcinia intermedia|Symphonia globulifera|Rourea schippii|Dichapetalum morenoi|Vaccinium poasanum|Erythroxylum macrophyllum|Acalypha diversifolia|Acidoton nicaraguensis|Sapi…	35	Menispermaceae|Euphorbiaceae|Rubiaceae|Moraceae|Calophyllaceae|Salicaceae|Urticaceae|Ochnaceae|Sapotaceae|Clethraceae|Sapindaceae|Fabaceae|Dichapetalaceae|Putranjivaceae|Erythroxylaceae|Clusiaceae|Meliaceae|Annonaceae|Erythropalaceae|Heliconiaceae|Phyllanthaceae|Malpighiaceae|Chrysobalanaceae|Marantaceae|Lacistemataceae|Sabiaceae|Lauraceae|Burseraceae|Fagaceae|Boraginaceae|Connaraceae|Ericaceae|L…	17	Ranunculales|Malpighiales|Gentianales|Rosales|Ericales|Sapindales|Fabales|Magnoliales|Santalales|Zingiberales|Proteales|Laurales|Fagales|Boraginales|Oxalidales|Lamiales|Myrtales
Saturniidae	Hemileucinae	Hemileucini	Automeris	Automeris annulata									1	Robinia	1	Robinia pseudoacacia	1	Fabaceae	1	Fabales
Saturniidae	Hemileucinae	Hemileucini	Automeris	Automeris averna									3	Ligustrum|Fagus|Quercus	3	Ligustrum|Fagus sylvatica|Quercus ilex	2	Fagaceae|Oleaceae	2	Fagales|Lamiales
Saturniidae	Hemileucinae	Hemileucini	Automeris	Automeris banus	101	Clethra|Pouteria|Styrax|Clibadium|Salmea|Vernonanthura|Augusta|Pentagonia|Rondeletia|Mendoncia|Tabebuia|Solanum|Cordia|Bactris|Calyptrogyne|Geonoma|Orbignya|Cynodon|Pharus|Meliosma|Abuta|Cissampelos|Senna|Inga|Andira|Dioclea|Erythrina|Lonchocarpus|Machaerium|Pterocarpus|Swartzia|Dichapetalum|Acalypha|Acidoton|Sapium|Lacistema|Hiraea|Weinmannia|Sloanea|Cecropia|Coussapoa|Brosimum|Sorocea|Gouania|P…	131	Clethra lanata|Clethra mexicana|Pouteria exfoliata|Styrax argenteus|Clibadium|Salmea scandens|Vernonanthura patens|Augusta rivalis|Pentagonia donnell-smithii|Rondeletia buddleioides|Mendoncia retusa|Tabebuia sp.|Solanum sp.|Cordia sp.|Cordia alliodora|Cordia cymosa|Cordia eriostigma|Bactris guineensis|Calyptrogyne ghiesbreghtiana|Geonoma ferruginea|Orbignya cohune|Cynodon nlemfuensis|Pharus sp.|M…	43	Menispermaceae|Euphorbiaceae|Sapindaceae|Cyatheaceae|Fabaceae|Bignoniaceae|Rubiaceae|Arecaceae|Malpighiaceae|Moraceae|Marantaceae|Calophyllaceae|Urticaceae|Solanaceae|Verbenaceae|Clethraceae|Asteraceae|Polygonaceae|Combretaceae|Connaraceae|Melastomataceae|Boraginaceae|Costaceae|Poaceae|Dichapetalaceae|Erythroxylaceae|Rhamnaceae|Meliaceae|Annonaceae|Malvaceae|Chrysobalanaceae|Lacistemataceae|Convo…	22	Ranunculales|Malpighiales|Sapindales|Cyatheales|Fabales|Lamiales|Gentianales|Arecales|Rosales|Zingiberales|Solanales|Ericales|Asterales|Caryophyllales|Myrtales|Oxalidales|Boraginales|Poales|Magnoliales|Malvales|Proteales|Alismatales	4	Gleditsia|Robinia|Malus|Malosma	4	Gleditsia triacanthos|Robinia pseudoacacia|Malus domestica|Malosma laurina	3	Fabaceae|Anacardiaceae|Rosaceae	3	Fabales|Sapindales|Rosales
Saturniidae	Hemileucinae	Hemileucini	Automeris	Automeris beckeri	1	Sorocea	1	Sorocea ilicifolia	1	Moraceae	1	Rosales	3	Fagus|Quercus|Prunus	3	Fagus sylvatica|Quercus ilex|Prunus sp.	2	Fagaceae|Rosaceae	2	Fagales|Rosales
Saturniidae	Hemileucinae	Hemileucini	Automeris	Automeris belti	69	Carapa|Clethra|Vernonanthura|Chimarrhis|Pentagonia|Psychotria|Gmelina|Vitex|Cestrum|Nectandra|Ocotea|Piper|Abuta|Senna|Inga|Dioclea|Pterocarpus|Rhynchosia|Acalypha|Hyeronima|Coussapoa|Ficus|Trema|Myriocarpa|Pavonia|Sida|Heliocarpus|Psidium|Swietenia|Talisia|Alsophila|Tabernaemontana|Ilex|Welfia|Lepidaploa|Zexmenia|Anemopaegma|Crescentia|Cordia|Protium|Perrottetia|Ipomoea|Erythroxylum|Croton|Andir…	79	Carapa guianensis|Clethra mexicana|Vernonanthura patens|Chimarrhis parviflora|Pentagonia donnell-smithii|Psychotria|Gmelina arborea|Vitex cooperi|Cestrum racemosum|Nectandra hihua|Ocotea insularis|Piper auritum|Piper fimbriulatum|Abuta panamensis|Senna papillosa|Inga oerstediana|Inga punctata|Dioclea malacocarpa|Pterocarpus rohrii|Rhynchosia pyramidalis|Acalypha diversifolia|Hyeronima sp.|Coussap…	33	Menispermaceae|Euphorbiaceae|Cyatheaceae|Fabaceae|Bignoniaceae|Malpighiaceae|Rubiaceae|Meliaceae|Urticaceae|Ochnaceae|Solanaceae|Clethraceae|Boraginaceae|Sapindaceae|Erythroxylaceae|Myrtaceae|Moraceae|Lamiaceae|Malvaceae|Phyllanthaceae|Aquifoliaceae|Convolvulaceae|Asteraceae|Lauraceae|Dipentodontaceae|Piperaceae|Marantaceae|Burseraceae|Loranthaceae|Apocynaceae|Melastomataceae|Cannabaceae|Arecaceae	21	Ranunculales|Malpighiales|Cyatheales|Fabales|Lamiales|Gentianales|Sapindales|Rosales|Solanales|Ericales|Boraginales|Myrtales|Malvales|Aquifoliales|Asterales|Laurales|Huerteales|Piperales|Zingiberales|Santalales|Arecales
Saturniidae	Hemileucinae	Hemileucini	Automeris	Automeris bilinea	8	Erythroxylum|Aspidosperma|Patagonula|Roupala|Hymenaea|Machaerium|Connarus|Terminalia	9	Erythroxylum deciduum|Aspidosperma tomentosum|Patagonula americana|Roupala montana|Hymenaea stigonocarpa|Machaerium opacum|Erythroxylum tortuosum|Connarus suberosus|Terminalia balansae	7	Apocynaceae|Connaraceae|Erythroxylaceae|Fabaceae|Boraginaceae|Proteaceae|Combretaceae	7	Gentianales|Oxalidales|Malpighiales|Fabales|Boraginales|Proteales|Myrtales
Saturniidae	Hemileucinae	Hemileucini	Automeris	Automeris boucardi									1	Laburnum	1	Laburnum anagyroides	1	Fabaceae	1	Fabales
Saturniidae	Hemileucinae	Hemileucini	Automeris	Automeris boudinotiana									1	Quercus	1	Quercus sp.	1	Fagaceae	1	Fagales
Saturniidae	Hemileucinae	Hemileucini	Automeris	Automeris cecrops	7	Arctostaphylos|Opuntia|Mimosa|Robinia|Quercus|Ceanothus|Cercocarpus	13	Arctostaphylos pungens|Opuntia|Mimosa aculeaticarpa|Mimosa dysocarpa|Robinia neomexicana|Quercus|Quercus emoryi|Quercus marilandica|Quercus oblongifolia|Quercus x pauciloba|Ceanothus fendleri|Cercocarpus betuloides|Cercocarpus parvifolius	6	Ericaceae|Rhamnaceae|Rosaceae|Fabaceae|Cactaceae|Fagaceae	5	Ericales|Rosales|Fabales|Caryophyllales|Fagales	9	Arctostaphylos|Cercis|Quercus|Salix|Cercocarpus|Prunus|Liriodendron|Celtis|Malosma	20	Arctostaphylos patula|Cercis canadensis|Quercus|Quercus alba|Quercus emoryi|Quercus kelloggii|Quercus nigra|Quercus oblongifolia|Quercus phellos|Quercus suber|Salix|Salix fluviatilis|Cercocarpus betuloides|Prunus serotina|Liriodendron tulipifera|Quercus gambelii|Quercus palustris|Quercus rubra|Celtis pallida|Malosma laurina	8	Ericaceae|Cannabaceae|Fabaceae|Rosaceae|Magnoliaceae|Anacardiaceae|Fagaceae|Salicaceae	7	Ericales|Rosales|Fabales|Magnoliales|Sapindales|Fagales|Malpighiales
Saturniidae	Hemileucinae	Hemileucini	Automeris	Automeris celata	9	Acalypha|Adelia|Zexmenia|Cordia|Croton|Dioclea|Ocotea|Trichospermum|Urera	9	Acalypha diversifolia|Adelia triloba|Zexmenia virgulta|Cordia bicolor|Croton morifolius|Dioclea malacocarpa|Ocotea cernua|Trichospermum grewiifolium|Urera elata	7	Euphorbiaceae|Boraginaceae|Fabaceae|Lauraceae|Malvaceae|Urticaceae|Asteraceae	7	Malpighiales|Boraginales|Fabales|Laurales|Malvales|Rosales|Asterales
Saturniidae	Hemileucinae	Hemileucini	Automeris	Automeris chrisbrechlinae	4	Inga|Guarea|Cespedesia|Paullinia	4	Inga chocoensis|Guarea bullata|Cespedesia spathulata|Paullinia grandifolia	4	Ochnaceae|Meliaceae|Fabaceae|Sapindaceae	3	Malpighiales|Sapindales|Fabales
Saturniidae	Hemileucinae	Hemileucini	Automeris	Automeris cinctistriga	2	Cocos|Morus	2	Cocos nucifera|Morus alba	2	Arecaceae|Moraceae	2	Arecales|Rosales
Saturniidae	Hemileucinae	Hemileucini	Automeris	Automeris colenon									1	Cynodon	1	Cynodon sp.	1	Poaceae	1	Poales
Saturniidae	Hemileucinae	Hemileucini	Automeris	Automeris coresus	9	Ligustrum|Platanus|Acacia|Erythrina|Robinia|Populus|Salix|Pyrus|Rosa	9	Ligustrum sp.|Platanus orientalis|Acacia sp.|Erythrina crista-galli|Robinia sp.|Populus sp.|Salix sp.|Pyrus communis|Rosa sp.	5	Fabaceae|Oleaceae|Platanaceae|Salicaceae|Rosaceae	5	Fabales|Lamiales|Proteales|Malpighiales|Rosales	3	Ligustrum|Quercus|Acer	4	Ligustrum sp.|Quercus robur|Acer campestre|Acer pseudoplatanus	3	Sapindaceae|Oleaceae|Fagaceae	3	Sapindales|Lamiales|Fagales
Saturniidae	Hemileucinae	Hemileucini	Automeris	Automeris dagmarae	10	Tabebuia|Trema|Dalbergia|Erythrina|Hymenaea|Lonchocarpus|Quercus|Ochroma|Picramnia|Coussapoa	10	Tabebuia rosea|Trema micrantha|Dalbergia retusa|Erythrina costaricensis|Hymenaea courbaril|Lonchocarpus guatemalensis|Quercus oleoides|Ochroma pyramidale|Picramnia antidesma|Coussapoa nymphaeifolia	7	Urticaceae|Fabaceae|Malvaceae|Picramniaceae|Fagaceae|Bignoniaceae|Cannabaceae	6	Rosales|Fabales|Malvales|Picramniales|Fagales|Lamiales
Saturniidae	Hemileucinae	Hemileucini	Automeris	Automeris denticulata									2	Quercus|Prunus	2	Quercus kelloggii|Prunus domestica	2	Rosaceae|Fagaceae	2	Rosales|Fagales
Saturniidae	Hemileucinae	Hemileucini	Automeris	Automeris diavolanda									3	Robinia|Carpinus|Quercus	3	Robinia sp.|Carpinus betulus|Quercus x turneri	3	Betulaceae|Fagaceae|Fabaceae	2	Fagales|Fabales
Saturniidae	Hemileucinae	Hemileucini	Automeris	Automeris draudtiana									2	Gleditsia|Robinia	2	Gleditsia|Robinia pseudoacacia	1	Fabaceae	1	Fabales
Saturniidae	Hemileucinae	Hemileucini	Automeris	Automeris duchartrei									1	Robinia	1	Robinia pseudoacacia	1	Fabaceae	1	Fabales
Saturniidae	Hemileucinae	Hemileucini	Automeris	Automeris egeus	3	Alibertia|Hirtella|Tapura	3	Alibertia edulis|Hirtella sp.|Tapura amazonica	3	Rubiaceae|Chrysobalanaceae|Dichapetalaceae	2	Gentianales|Malpighiales	1	Erythrina	1	Erythrina sp.	1	Fabaceae	1	Fabales
Saturniidae	Hemileucinae	Hemileucini	Automeris	Automeris excreta									4	Ligustrum|Prunus|Robinia|Malus	5	Ligustrum ovalifolium|Prunus domestica|Robinia pseudoacacia|Malus domestica|Prunus	3	Oleaceae|Rosaceae|Fabaceae	3	Lamiales|Rosales|Fabales
Saturniidae	Hemileucinae	Hemileucini	Automeris	Automeris exigua	1	Ochroma	1	Ochroma pyramidale	1	Malvaceae	1	Malvales	1	Erythrina	1	Erythrina sp.	1	Fabaceae	1	Fabales
Saturniidae	Hemileucinae	Hemileucini	Automeris	Automeris godartii									1	Gleditsia	1	Gleditsia triacanthos	1	Fabaceae	1	Fabales
Saturniidae	Hemileucinae	Hemileucini	Automeris	Automeris grammodes									1	Phyllostachys	1	Phyllostachys nigra	1	Poaceae	1	Poales
Saturniidae	Hemileucinae	Hemileucini	Automeris	Automeris granulosus	5	Bauhinia|Chamaecrista|Erythrina|Erythroxylum|Byrsonima	6	Bauhinia|Chamaecrista adenophora|Chamaecrista multiseta|Erythrina velutina|Erythroxylum tortuosum|Byrsonima verbascifolia	3	Fabaceae|Malpighiaceae|Erythroxylaceae	2	Fabales|Malpighiales	3	Robinia|Vatairea|Erythroxylum	3	Robinia pseudoacacia|Vatairea macrocarpa|Erythroxylum anguifugum	2	Erythroxylaceae|Fabaceae	2	Malpighiales|Fabales
Saturniidae	Hemileucinae	Hemileucini	Automeris	Automeris hamata	4	Ixora|Tabebuia|Alfaroa|Pleiostachya	4	Ixora floribunda|Tabebuia rosea|Alfaroa guanacastensis|Pleiostachya leiostachya	4	Juglandaceae|Rubiaceae|Marantaceae|Bignoniaceae	4	Fagales|Gentianales|Zingiberales|Lamiales	5	Bauhinia|Laburnum|Robinia|Fagus|Salix	5	Bauhinia variegata|Laburnum anagyroides|Robinia pseudoacacia|Fagus sylvatica|Salix	3	Fabaceae|Fagaceae|Salicaceae	3	Fabales|Fagales|Malpighiales
Saturniidae	Hemileucinae	Hemileucini	Automeris	Automeris harrisorum									1	Robinia	1	Robinia pseudoacacia	1	Fabaceae	1	Fabales
Saturniidae	Hemileucinae	Hemileucini	Automeris	Automeris illustris	25	Ilex|Lonicera|Coffea|Plumbago|Saccharum|Magnolia|Platanus|Acacia|Inga|Cajanus|Erythrina|Pisum|Wisteria|Salix|Ficus|Rosa|Trema|Bombax|Gossypium|Lafoensia|Lagerstroemia|Eucalyptus|Psidium|Mangifera|Citrus	31	Ilex paraguariensis|Lonicera caprifolium|Coffea sp.|Plumbago auriculata|Saccharum officinarum|Magnolia virginiana|Platanus orientalis|Acacia|Acacia caven|Acacia dealbata|Acacia farnesiana|Inga edulis|Cajanus cajan|Erythrina velutina|Pisum sativum|Wisteria sinensis|Salix babylonica|Salix humboldtiana|Ficus benjamina|Rosa sp.|Trema micrantha|Bombax sp.|Gossypium herbaceum|Lafoensia glyptocarpa|Lage…	17	Fabaceae|Malvaceae|Rutaceae|Rubiaceae|Myrtaceae|Moraceae|Aquifoliaceae|Lythraceae|Caprifoliaceae|Magnoliaceae|Anacardiaceae|Platanaceae|Plumbaginaceae|Rosaceae|Poaceae|Salicaceae|Cannabaceae	13	Fabales|Malvales|Sapindales|Gentianales|Myrtales|Rosales|Aquifoliales|Dipsacales|Magnoliales|Proteales|Caryophyllales|Poales|Malpighiales	8	Ligustrum|Syringa|Inga|Fagus|Crataegus|Psidium|Malus|Prunus	9	Ligustrum|Syringa vulgaris|Inga|Fagus sylvatica|Crataegus|Psidium guajava|Ligustrum vulgare|Malus domestica|Prunus domestica	5	Rosaceae|Fagaceae|Fabaceae|Oleaceae|Myrtaceae	5	Rosales|Fagales|Fabales|Lamiales|Myrtales
Saturniidae	Hemileucinae	Hemileucini	Automeris	Automeris incarnata	2	Eucalyptus|Citrus	2	Eucalyptus sp.|Citrus sp.	2	Rutaceae|Myrtaceae	2	Sapindales|Myrtales	3	Laburnum|Robinia|Fagus	3	Laburnum anagyroides|Robinia pseudoacacia|Fagus sylvatica	2	Fagaceae|Fabaceae	2	Fagales|Fabales
Saturniidae	Hemileucinae	Hemileucini	Automeris	Automeris innoxia									3	Ligustrum|Platanus|Acer	3	Ligustrum vulgare|Platanus occidentalis|Acer campestre	3	Sapindaceae|Oleaceae|Platanaceae	3	Sapindales|Lamiales|Proteales
Saturniidae	Hemileucinae	Hemileucini	Automeris	Automeris inornata									3	Robinia|Quercus|Prunus	3	Robinia pseudoacacia|Quercus ilex|Prunus domestica	3	Rosaceae|Fagaceae|Fabaceae	3	Rosales|Fagales|Fabales
Saturniidae	Hemileucinae	Hemileucini	Automeris	Automeris io	109	Crescentia|Petrea|Cordia|Hyparrhenia|Ocotea|Senna|Mimosa|Acosmium|Ateleia|Canavalia|Dalbergia|Dalea|Galactia|Gliricidia|Indigofera|Lonchocarpus|Phaseolus|Rhynchosia|Pachira|Ribes|Liquidambar|Cornus|Rhododendron|Ilex|Viburnum|Symphoricarpos|Fraxinus|Ligustrum|Gladiolus|Serenoa|Cynodon|Zea|Sassafras|Liriodendron|Magnolia|Platanus|Cercis|Chamaecrista|Delonix|Gleditsia|Leucaena|Amorpha|Apios|Baptisia…	207	Crescentia alata|Petrea volubilis|Cordia alliodora|Hyparrhenia rufa|Ocotea cernua|Senna pallida|Mimosa camporum|Mimosa pigra|Acosmium panamense|Ateleia herbert-smithii|Canavalia brasiliensis|Dalbergia retusa|Dalea carthagenensis|Galactia striata|Gliricidia sepium|Indigofera costaricensis|Lonchocarpus minimiflorus|Lonchocarpus phlebophyllus|Phaseolus|Phaseolus vulgaris|Rhynchosia|Rhynchosia calyco…	40	Pinaceae|Sapindaceae|Fabaceae|Rosaceae|Betulaceae|Juglandaceae|Casuarinaceae|Cannabaceae|Myricaceae|Combretaceae|Melastomataceae|Boraginaceae|Cornaceae|Bignoniaceae|Euphorbiaceae|Poaceae|Myrtaceae|Fagaceae|Oleaceae|Iridaceae|Malvaceae|Zygophyllaceae|Aquifoliaceae|Altingiaceae|Magnoliaceae|Lythraceae|Asteraceae|Moraceae|Lauraceae|Verbenaceae|Platanaceae|Salicaceae|Arecaceae|Rhizophoraceae|Ericacea…	23	Pinales|Sapindales|Fabales|Rosales|Fagales|Myrtales|Boraginales|Cornales|Lamiales|Malpighiales|Poales|Asparagales|Malvales|Zygophyllales|Aquifoliales|Saxifragales|Magnoliales|Asterales|Laurales|Proteales|Arecales|Ericales|Dipsacales	31	Inga|Liquidambar|Diospyros|Rhododendron|Ligustrum|Syringa|Sassafras|Liriodendron|Baptisia|Erythrina|Quercus|Juglans|Populus|Salix|Ficus|Malus|Prunus|Rosa|Rubus|Ulmus|Acer|Fagus|Cercis|Glycyrrhiza|Laburnum|Cercocarpus|Celtis|Gleditsia|Mimosa|Robinia|Tilia	51	Inga vera|Liquidambar|Diospyros|Rhododendron|Ligustrum|Syringa vulgaris|Sassafras|Liriodendron tulipifera|Baptisia tinctoria|Erythrina herbacea|Quercus|Quercus acutissima|Quercus kelloggii|Quercus nigra|Juglans|Populus|Salix|Ficus benjamina|Malus|Prunus|Prunus angustifolia|Prunus domestica|Prunus serotina|Prunus virginiana|Rosa|Rubus flagellaris|Ulmus|Ulmus parvifolia|Acer macrophyllum|Fagus|Quer…	16	Sapindaceae|Fabaceae|Cannabaceae|Rosaceae|Ebenaceae|Fagaceae|Moraceae|Juglandaceae|Oleaceae|Altingiaceae|Magnoliaceae|Salicaceae|Ericaceae|Lauraceae|Malvaceae|Ulmaceae	11	Sapindales|Fabales|Rosales|Ericales|Fagales|Lamiales|Saxifragales|Magnoliales|Malpighiales|Laurales|Malvales
Saturniidae	Hemileucinae	Hemileucini	Automeris	Automeris iris	4	Mimosa|Eysenhardtia|Tephrosia|Quercus	4	Mimosa dysocarpa|Eysenhardtia polystachya|Tephrosia leiocarpa|Quercus	2	Fabaceae|Fagaceae	2	Fabales|Fagales	4	Chilopsis|Mimosa|Robinia|Quercus	7	Chilopsis linearis|Mimosa|Robinia pseudoacacia|Quercus|Quercus palustris|Quercus virginiana|Robinia	3	Bignoniaceae|Fabaceae|Fagaceae	3	Lamiales|Fabales|Fagales
Saturniidae	Hemileucinae	Hemileucini	Automeris	Automeris janus	13	Cocos|Erythrina|Spathodea|Tabebuia|Cordia|Bauhinia|Hymenaea|Gliricidia|Hura|Ceiba|Terminalia|Melicoccus|Sapindus	18	Cocos nucifera|Erythrina|Spathodea campanulata|Tabebuia rosea|Cordia alba|Cordia collococca|Cordia sebestena|Bauhinia glabra|Hymenaea courbaril|Erythrina fusca|Erythrina poeppigiana|Erythrina velutina|Gliricidia sepium|Hura crepitans|Ceiba pentandra|Terminalia catappa|Melicoccus bijugatus|Sapindus saponaria	8	Fabaceae|Malvaceae|Arecaceae|Boraginaceae|Euphorbiaceae|Sapindaceae|Bignoniaceae|Combretaceae	8	Fabales|Malvales|Arecales|Boraginales|Malpighiales|Sapindales|Lamiales|Myrtales	2	Fagus|Malus	2	Fagus sylvatica|Malus sp.	2	Fagaceae|Rosaceae	2	Fagales|Rosales
Saturniidae	Hemileucinae	Hemileucini	Automeris	Automeris jucunda									3	Robinia|Fagus|Prunus	3	Robinia pseudoacacia|Fagus sylvatica|Prunus domestica	3	Fagaceae|Rosaceae|Fabaceae	3	Fagales|Rosales|Fabales
Saturniidae	Hemileucinae	Hemileucini	Automeris	Automeris liberia	16	Citrus|Arracacia|Cordia|Cocos|Saccharum|Sorghum|Zea|Virola|Schizolobium|Leucaena|Juglans|Cecropia|Brosimum|Prunus|Swietenia|Cupressus	16	Citrus medica|Arracacia xanthorrhiza|Cordia alliodora|Cocos nucifera|Saccharum officinarum|Sorghum bicolor|Zea mays|Virola sebifera|Schizolobium parahybum|Leucaena leucocephala|Juglans neotropica|Cecropia|Brosimum utile|Prunus capuli|Swietenia macrophylla|Cupressus	13	Apiaceae|Moraceae|Urticaceae|Rutaceae|Arecaceae|Boraginaceae|Cupressaceae|Juglandaceae|Fabaceae|Rosaceae|Poaceae|Meliaceae|Myristicaceae	10	Apiales|Rosales|Sapindales|Arecales|Boraginales|Cupressales|Fagales|Fabales|Poales|Magnoliales	6	Acacia|Robinia|Ligustrum|Salix|Gleditsia|Malus	6	Acacia baileyana|Robinia pseudoacacia|Ligustrum vulgare|Salix|Gleditsia triacanthos|Malus domestica	4	Fabaceae|Oleaceae|Rosaceae|Salicaceae	4	Fabales|Lamiales|Rosales|Malpighiales
Saturniidae	Hemileucinae	Hemileucini	Automeris	Automeris louisiana	2	Scirpus|Spartina	2	Scirpus sp.|Spartina alterniflora	2	Cyperaceae|Poaceae	1	Poales	6	Ligustrum|Cercis|Quercus|Salix|Prunus|Celtis	8	Ligustrum|Cercis canadensis|Quercus virginiana|Salix babylonica|Salix caroliniana|Prunus|Prunus serotina|Celtis	6	Cannabaceae|Fabaceae|Oleaceae|Rosaceae|Fagaceae|Salicaceae	5	Rosales|Fabales|Lamiales|Fagales|Malpighiales
Saturniidae	Hemileucinae	Hemileucini	Automeris	Automeris macphaili									2	Acacia|Robinia	2	Acacia baileyana|Robinia pseudoacacia	1	Fabaceae	1	Fabales
Saturniidae	Hemileucinae	Hemileucini	Automeris	Automeris maximae									1	Fagus	1	Fagus sylvatica	1	Fagaceae	1	Fagales
Saturniidae	Hemileucinae	Hemileucini	Automeris	Automeris melanops	17	Aspidosperma|Persea|Platanus|Cassia|Tamarindus|Tipuana|Licania|Acalypha|Ricinus|Prunus|Hibiscus|Terminalia|Eugenia|Lithraea|Schinus|Cupressus|Rosa	18	Aspidosperma parvifolium|Persea americana|Platanus orientalis|Cassia javanica|Tamarindus indica|Tipuana tipu|Licania tomentosa|Acalypha sp.|Acalypha tricolor|Ricinus communis|Prunus dulcis|Hibiscus tiliaceus|Terminalia catappa|Eugenia uvalha|Lithraea brasiliensis|Schinus terebinthifolius|Cupressus glauca|Rosa sp.	12	Euphorbiaceae|Apocynaceae|Fabaceae|Cupressaceae|Myrtaceae|Malvaceae|Chrysobalanaceae|Anacardiaceae|Lauraceae|Platanaceae|Rosaceae|Combretaceae	10	Malpighiales|Gentianales|Fabales|Cupressales|Myrtales|Malvales|Sapindales|Laurales|Proteales|Rosales
Saturniidae	Hemileucinae	Hemileucini	Automeris	Automeris melmon									3	Persea|Erythrina|Robinia	3	Persea americana|Erythrina americana|Robinia sp.	2	Fabaceae|Lauraceae	2	Fabales|Laurales
Saturniidae	Hemileucinae	Hemileucini	Automeris	Automeris metzli	18	Tabebuia|Platanus|Cassia|Hymenaea|Dalbergia|Erythrina|Quercus|Trema|Ochroma|Melicoccus|Spathodea|Cordia|Bauhinia|Gliricidia|Hura|Ceiba|Terminalia|Sapindus	24	Tabebuia rosea|Platanus occidentalis|Cassia grandis|Hymenaea courbaril|Dalbergia retusa|Erythrina|Erythrina rubra|Quercus oleoides|Trema micrantha|Ochroma pyramidale|Melicoccus bijugatus|Spathodea campanulata|Cordia alba|Cordia collococca|Cordia sebestena|Bauhinia glabra|Erythrina fusca|Erythrina poeppigiana|Erythrina velutina|Gliricidia sepium|Hura crepitans|Ceiba pentandra|Terminalia catappa|Sa…	10	Fabaceae|Malvaceae|Boraginaceae|Euphorbiaceae|Sapindaceae|Platanaceae|Fagaceae|Bignoniaceae|Combretaceae|Cannabaceae	10	Fabales|Malvales|Boraginales|Malpighiales|Sapindales|Proteales|Fagales|Lamiales|Myrtales|Rosales	3	Crataegus|Malus|Quercus	4	Crataegus sp.|Malus domestica|Quercus alba|Quercus coccinea	2	Rosaceae|Fagaceae	2	Rosales|Fagales
Saturniidae	Hemileucinae	Hemileucini	Automeris	Automeris midea									1	Robinia	1	Robinia pseudoacacia	1	Fabaceae	1	Fabales
Saturniidae	Hemileucinae	Hemileucini	Automeris	Automeris moloneyi	1	Saccharum	1	Saccharum officinarum	1	Poaceae	1	Poales	4	Acacia|Robinia|Quercus|Salix	4	Acacia baileyana|Robinia pseudoacacia|Quercus virginiana|Salix sp.	3	Fabaceae|Fagaceae|Salicaceae	3	Fabales|Fagales|Malpighiales
Saturniidae	Hemileucinae	Hemileucini	Automeris	Automeris montezuma									1	Robinia	1	Robinia pseudoacacia	1	Fabaceae	1	Fabales
Saturniidae	Hemileucinae	Hemileucini	Automeris	Automeris moresca									1	Robinia	1	Robinia pseudoacacia	1	Fabaceae	1	Fabales
Saturniidae	Hemileucinae	Hemileucini	Automeris	Automeris muscula									1	Rosa	1	Rosa sp.	1	Rosaceae	1	Rosales
Saturniidae	Hemileucinae	Hemileucini	Automeris	Automeris naranja	35	Mimosa|Erythrina|Tipuana|Pinus|Coffea|Platanus|Bauhinia|Acacia|Spartium|Ricinus|Lagerstroemia|Psidium|Citrus|Jasminum|Ligustrum|Wisteria|Passiflora|Morus|Prunus|Pyrus|Sapindus|Ilex|Lonicera|Jacaranda|Tabebuia|Tecoma|Canna|Phoebe|Annona|Caesalpinia|Rosa|Phyllostylon|Hibiscus|Acca|Cupressus	48	Mimosa bimucronata|Erythrina crista-galli|Tipuana tipu|Pinus oocarpa|Coffea arabica|Platanus occidentalis|Platanus orientalis|Bauhinia forficata|Acacia sp.|Mimosa sp.|Spartium junceum|Ricinus communis|Lagerstroemia indica|Psidium guajava|Citrus aurantium|Jasminum angustifolium|Jasminum azoricum|Jasminum officinale|Ligustrum sp.|Acacia dealbata|Acacia longifolia|Wisteria sinensis|Passiflora sp.|Mo…	22	Fabaceae|Myrtaceae|Annonaceae|Cannaceae|Rutaceae|Rubiaceae|Cupressaceae|Malvaceae|Aquifoliaceae|Bignoniaceae|Oleaceae|Lythraceae|Caprifoliaceae|Moraceae|Passifloraceae|Lauraceae|Ulmaceae|Pinaceae|Platanaceae|Rosaceae|Euphorbiaceae|Sapindaceae	16	Fabales|Myrtales|Magnoliales|Zingiberales|Sapindales|Gentianales|Cupressales|Malvales|Aquifoliales|Lamiales|Dipsacales|Rosales|Malpighiales|Laurales|Pinales|Proteales	9	Ligustrum|Quercus|Prunus|Syringa|Salix|Acalypha|Terminalia|Lonicera|Acca	17	Ligustrum ovalifolium|Quercus ilex|Quercus virginiana|Prunus laurocerasus|Ligustrum|Ligustrum vulgare|Syringa|Syringa vulgaris|Salix|Prunus|Prunus domestica|Prunus virginiana|Quercus|Acalypha|Terminalia catappa|Lonicera|Acca sellowiana	8	Euphorbiaceae|Myrtaceae|Oleaceae|Caprifoliaceae|Rosaceae|Fagaceae|Salicaceae|Combretaceae	6	Malpighiales|Myrtales|Lamiales|Dipsacales|Rosales|Fagales
Saturniidae	Hemileucinae	Hemileucini	Automeris	Automeris niepelti	59	Tapirira|Guatteria|Geonoma|Prestoea|Protium|Trema|Perrottetia|Hirtella|Symphonia|Terminalia|Rourea|Dichapetalum|Erythroxylum|Acalypha|Acidoton|Alchornea|Sapium|Cynometra|Dioclea|Inga|Machaerium|Ormosia|Tachigali|Zygia|Lacistema|Lozania|Vitex|Ocotea|Persea|Heliocarpus|Pavonia|Carapa|Guarea|Abuta|Cissampelos|Mollinedia|Brosimum|Ficus|Maquira|Naucleopsis|Pseudolmedia|Sorocea|Myrcia|Cespedesia|Quiina…	81	Tapirira mexicana|Guatteria amplifolia|Guatteria tonduzii|Geonoma ferruginea|Prestoea decurrens|Protium costaricense|Trema micrantha|Perrottetia longistylis|Hirtella media|Hirtella racemosa|Hirtella triandra|Symphonia globulifera|Terminalia amazonia|Rourea schippii|Dichapetalum grayumii|Dichapetalum morenoi|Erythroxylum macrophyllum|Acalypha diversifolia|Acalypha mortoniana|Acidoton nicaraguensis…	31	Menispermaceae|Euphorbiaceae|Moraceae|Meliaceae|Urticaceae|Ochnaceae|Rubiaceae|Sapindaceae|Fabaceae|Dichapetalaceae|Putranjivaceae|Erythroxylaceae|Arecaceae|Annonaceae|Malvaceae|Chrysobalanaceae|Lacistemataceae|Sabiaceae|Monimiaceae|Myrtaceae|Lauraceae|Dipentodontaceae|Sapotaceae|Burseraceae|Connaraceae|Clusiaceae|Anacardiaceae|Combretaceae|Cannabaceae|Lamiaceae|Rutaceae	16	Ranunculales|Malpighiales|Rosales|Sapindales|Gentianales|Fabales|Arecales|Magnoliales|Malvales|Proteales|Laurales|Myrtales|Huerteales|Ericales|Oxalidales|Lamiales
Saturniidae	Hemileucinae	Hemileucini	Automeris	Automeris oberthurii	1	Prosopis	2	Prosopis alba|Prosopis nigra	1	Fabaceae	1	Fabales
Saturniidae	Hemileucinae	Hemileucini	Automeris	Automeris orestes	1	Citrus	1	Citrus sp.	1	Rutaceae	1	Sapindales
Saturniidae	Hemileucinae	Hemileucini	Automeris	Automeris ovalina	2	Bambusa|Saccharum	2	Bambusa sp.|Saccharum officinarum	1	Poaceae	1	Poales	1	Bambusa	1	Bambusa sp.	1	Poaceae	1	Poales
Saturniidae	Hemileucinae	Hemileucini	Automeris	Automeris pallidior	21	Melanthera|Petrea|Cordia|Rhynchosia|Acalypha|Trigonia|Paullinia|Chamaedorea|Tabebuia|Alchornea|Calopogonium|Inga|Lonchocarpus|Tournefortia|Malvaviscus|Triumfetta|Conostegia|Eugenia|Lasiacis|Oplismenus|Guettarda	24	Melanthera aspera|Petrea volubilis|Cordia sp.|Rhynchosia sp.|Acalypha apodanthes|Acalypha diversifolia|Trigonia rugosa|Paullinia cururu|Chamaedorea costaricana|Melanthera nivea|Tabebuia rosea|Cordia alliodora|Alchornea latifolia|Calopogonium caeruleum|Inga punctata|Lonchocarpus oliganthus|Tournefortia bicolor|Malvaviscus arboreus|Triumfetta bogotensis|Conostegia xalapensis|Eugenia acapulcensis|La…	15	Euphorbiaceae|Fabaceae|Arecaceae|Melastomataceae|Boraginaceae|Myrtaceae|Rubiaceae|Poaceae|Malvaceae|Asteraceae|Sapindaceae|Verbenaceae|Bignoniaceae|Heliotropiaceae|Trigoniaceae	11	Malpighiales|Fabales|Arecales|Myrtales|Boraginales|Gentianales|Poales|Malvales|Asterales|Sapindales|Lamiales
Saturniidae	Hemileucinae	Hemileucini	Automeris	Automeris patagoniensis									3	Bouteloua|Cynodon|Poa	3	Bouteloua curtipendula|Cynodon dactylon|Poa sp.	1	Poaceae	1	Poales
Saturniidae	Hemileucinae	Hemileucini	Automeris	Automeris peigleri	1	Quercus	1	Quercus grisea	1	Fagaceae	1	Fagales	1	Populus	1	Populus alba	1	Salicaceae	1	Malpighiales
Saturniidae	Hemileucinae	Hemileucini	Automeris	Automeris phrynon	25	Clethra|Clibadium|Cestrum|Inga|Desmodium|Dioclea|Pterocarpus|Cecropia|Myriocarpa|Theobroma|Heliocarpus|Luehea|Trichospermum|Paullinia|Zexmenia|Chrysobalanus|Diospyros|Lonchocarpus|Byrsonima|Hampea|Coccoloba|Chimarrhis|Uncaria|Coussapoa|Urera	31	Clethra mexicana|Clibadium sp.|Cestrum racemosum|Inga punctata|Inga semialata|Desmodium sp.|Dioclea malacocarpa|Pterocarpus rohrii|Cecropia obtusifolia|Myriocarpa longipes|Theobroma cacao|Heliocarpus appendiculatus|Luehea seemannii|Trichospermum grewiifolium|Paullinia faginea|Zexmenia virgulta|Chrysobalanus icaco|Clethra lanata|Diospyros nigra|Desmodium incanum|Inga oerstediana|Lonchocarpus hepta…	12	Malpighiaceae|Urticaceae|Solanaceae|Rubiaceae|Chrysobalanaceae|Clethraceae|Asteraceae|Polygonaceae|Fabaceae|Ebenaceae|Malvaceae|Sapindaceae	10	Malpighiales|Rosales|Solanales|Gentianales|Ericales|Asterales|Caryophyllales|Fabales|Malvales|Sapindales	3	Inga|Terminalia|Malosma	4	Inga semialata|Inga vera|Terminalia sp.|Malosma laurina	3	Fabaceae|Anacardiaceae|Combretaceae	3	Fabales|Sapindales|Myrtales
Saturniidae	Hemileucinae	Hemileucini	Automeris	Automeris postalbida	125	Clethra|Vaccinium|Chrysophyllum|Pouteria|Piptocarpha|Forsteronia|Tabernaemontana|Bertiera|Chimarrhis|Chomelia|Coffea|Guettarda|Pentagonia|Posoqueria|Psychotria|Rondeletia|Gmelina|Vitex|Geonoma|Prestoea|Heliconia|Musa|Nectandra|Guatteria|Oxandra|Meliosma|Abuta|Cynometra|Sclerolobium|Senna|Inga|Zygia|Desmodium|Dioclea|Lonchocarpus|Machaerium|Quercus|Alfaroa|Hirtella|Licania|Dichapetalum|Erythroxylu…	188	Clethra mexicana|Vaccinium poasanum|Chrysophyllum brenesii|Pouteria exfoliata|Piptocarpha poeppigiana|Forsteronia spicata|Tabernaemontana alba|Bertiera bracteosa|Chimarrhis parviflora|Chomelia microloba|Coffea arabica|Guettarda sp.|Pentagonia donnell-smithii|Posoqueria latifolia|Psychotria berteriana|Psychotria eurycarpa|Rondeletia costaricensis|Gmelina arborea|Vitex cooperi|Geonoma ferruginea|Pr…	59	Menispermaceae|Euphorbiaceae|Juglandaceae|Rubiaceae|Moraceae|Marantaceae|Fabaceae|Calophyllaceae|Meliaceae|Salicaceae|Urticaceae|Ochnaceae|Solanaceae|Chrysobalanaceae|Sapotaceae|Clethraceae|Rhamnaceae|Melastomataceae|Boraginaceae|Costaceae|Poaceae|Sapindaceae|Dichapetalaceae|Putranjivaceae|Erythroxylaceae|Myrtaceae|Resedaceae|Apocynaceae|Clusiaceae|Arecaceae|Lamiaceae|Annonaceae|Malvaceae|Bignoni…	27	Ranunculales|Malpighiales|Fagales|Gentianales|Rosales|Zingiberales|Fabales|Sapindales|Solanales|Ericales|Myrtales|Boraginales|Poales|Brassicales|Arecales|Lamiales|Magnoliales|Malvales|Santalales|Asterales|Saxifragales|Proteales|Laurales|Alismatales|Oxalidales|Celastrales	1	Inga	1	Inga vera	1	Fabaceae	1	Fabales
Saturniidae	Hemileucinae	Hemileucini	Automeris	Automeris randa	2	Quercus|Celtis	2	Quercus sp.|Celtis pallida	2	Cannabaceae|Fagaceae	2	Rosales|Fagales	2	Quercus|Prunus	4	Quercus gambelii|Quercus palustris|Quercus rubra|Prunus serotina	2	Rosaceae|Fagaceae	2	Rosales|Fagales
Saturniidae	Hemileucinae	Hemileucini	Automeris	Automeris rubrescens	24	Crescentia|Cydista|Paragonia|Tabebuia|Cordia|Andira|Calliandra|Dalbergia|Dioclea|Diphysa|Inga|Lonchocarpus|Machaerium|Mimosa|Heliconia|Byrsonima|Stigmaphyllon|Ochroma|Carapa|Muntingia|Uncaria|Billia|Serjania|Lantana	27	Crescentia alata|Cydista heterophylla|Paragonia pyramidata|Tabebuia rosea|Cordia collococca|Andira inermis|Calliandra calothyrsus|Dalbergia retusa|Dioclea wilsonii|Diphysa americana|Inga oerstediana|Inga samanensis|Inga spectabilis|Lonchocarpus heptaphyllus|Lonchocarpus retiferus|Machaerium salvadorense|Mimosa watsonii|Heliconia latispatha|Byrsonima crassifolia|Stigmaphyllon lindenianum|Ochroma p…	11	Fabaceae|Sapindaceae|Malpighiaceae|Meliaceae|Boraginaceae|Bignoniaceae|Heliconiaceae|Verbenaceae|Muntingiaceae|Malvaceae|Rubiaceae	8	Fabales|Sapindales|Malpighiales|Boraginales|Lamiales|Zingiberales|Malvales|Gentianales
Saturniidae	Hemileucinae	Hemileucini	Automeris	Automeris silkae	2	Guatteria|Cosmibuena	2	Guatteria tonduzii|Cosmibuena valerii	2	Rubiaceae|Annonaceae	2	Gentianales|Magnoliales
Saturniidae	Hemileucinae	Hemileucini	Automeris	Automeris styx									5	Ligustrum|Robinia|Quercus|Salix|Prunus	5	Ligustrum|Robinia pseudoacacia|Quercus virginiana|Salix caprea|Prunus domestica	5	Oleaceae|Rosaceae|Fagaceae|Fabaceae|Salicaceae	5	Lamiales|Rosales|Fagales|Fabales|Malpighiales
Saturniidae	Hemileucinae	Hemileucini	Automeris	Automeris tatiae									1	Fagus	1	Fagus sylvatica	1	Fagaceae	1	Fagales
Saturniidae	Hemileucinae	Hemileucini	Automeris	Automeris tridens	66	Augusta|Calycophyllum|Genipa|Uncaria|Amphilophium|Crescentia|Cydista|Tabebuia|Lantana|Rehdera|Tectona|Solanum|Cordia|Triplaris|Rottboellia|Heliconia|Caesalpinia|Haematoxylum|Hymenaea|Senna|Acacia|Enterolobium|Inga|Lysiloma|Mimosa|Pithecellobium|Canavalia|Coursetia|Crotalaria|Dalbergia|Diphysa|Lonchocarpus|Machaerium|Piscidia|Platymiscium|Quercus|Hirtella|Licania|Erythroxylum|Casearia|Zuelania|Ban…	92	Augusta rivalis|Calycophyllum candidissimum|Genipa americana|Uncaria tomentosa|Amphilophium paniculatum|Crescentia alata|Cydista|Cydista diversifolia|Cydista heterophylla|Tabebuia impetiginosa|Tabebuia ochracea|Tabebuia rosea|Lantana camara|Rehdera trinervis|Tectona grandis|Solanum hazenii|Cordia alliodora|Cordia collococca|Cordia inermis|Cordia panamensis|Triplaris melaenodenron|Rottboellia coch…	29	Fabaceae|Bignoniaceae|Rubiaceae|Malpighiaceae|Malvaceae|Salicaceae|Combretaceae|Melastomataceae|Boraginaceae|Erythroxylaceae|Heliconiaceae|Chrysobalanaceae|Rhamnaceae|Krameriaceae|Verbenaceae|Sapotaceae|Muntingiaceae|Ochnaceae|Sapindaceae|Myrtaceae|Fagaceae|Poaceae|Connaraceae|Solanaceae|Anacardiaceae|Lamiaceae|Trigoniaceae|Polygonaceae|Asteraceae	18	Fabales|Lamiales|Gentianales|Malpighiales|Malvales|Myrtales|Boraginales|Zingiberales|Rosales|Zygophyllales|Ericales|Sapindales|Fagales|Poales|Oxalidales|Solanales|Caryophyllales|Asterales	8	Ligustrum|Acacia|Robinia|Quercus|Syringa|Laburnum|Salix|Prunus	13	Ligustrum japonicum|Acacia baileyana|Robinia pseudoacacia|Quercus|Syringa vulgaris|Laburnum anagyroides|Quercus kelloggii|Quercus robur|Salix|Salix babylonica|Prunus domestica|Prunus laurocerasus|Ligustrum	5	Fabaceae|Oleaceae|Rosaceae|Fagaceae|Salicaceae	5	Fabales|Lamiales|Rosales|Fagales|Malpighiales
Saturniidae	Hemileucinae	Hemileucini	Automeris	Automeris wernermeisteri									1	Fraxinus	1	Fraxinus excelsior	1	Oleaceae	1	Lamiales
Saturniidae	Hemileucinae	Hemileucini	Automeris	Automeris zephyria	2	Quercus|Salix	2	Quercus gambelii|Salix sp.	2	Fagaceae|Salicaceae	2	Fagales|Malpighiales	7	Cercis|Quercus|Salix|Cercocarpus|Prunus|Malus|Tilia	17	Cercis canadensis|Quercus alba|Quercus nigra|Quercus oblongifolia|Quercus palustris|Quercus petraea|Quercus phellos|Quercus robur|Quercus velutina|Salix babylonica|Cercocarpus betuloides|Prunus serotina|Prunus|Quercus rubra|Malus domestica|Prunus virginiana|Tilia	5	Fabaceae|Rosaceae|Fagaceae|Salicaceae|Malvaceae	5	Fabales|Rosales|Fagales|Malpighiales|Malvales
Saturniidae	Hemileucinae	Hemileucini	Automeris	Automeris zozimanaguana	108	Thunbergia|Spondias|Annona|Melanthera|Arrabidaea|Bignonia|Crescentia|Cydista|Handroanthus|Tabebuia|Varronia|Bursera|Trema|Hirtella|Licania|Rourea|Cordia|Diospyros|Sloanea|Erythroxylum|Acalypha|Mabea|Andira|Ateleia|Bauhinia|Calliandra|Calopogonium|Centrosema|Dalbergia|Desmodium|Dioclea|Diphysa|Enterolobium|Erythrina|Gliricidia|Hymenaea|Inga|Leptolobium|Leucaena|Lonchocarpus|Machaerium|Mimosa|Mucun…	140	Thunbergia grandiflora|Spondias mombin|Annona purpurea|Annona rensoniana|Melanthera nivea|Arrabidaea mollissima|Arrabidaea patellifera|Bignonia aequinoctialis|Crescentia alata|Cydista diversifolia|Cydista heterophylla|Handroanthus ochraceus|Tabebuia rosea|Varronia guanacastensis|Bursera simaruba|Trema micrantha|Hirtella racemosa|Licania arborea|Rourea glabra|Cordia alliodora|Cordia eriostigma|Cor…	41	Euphorbiaceae|Rubiaceae|Sapindaceae|Fabaceae|Annonaceae|Malvaceae|Bignoniaceae|Malpighiaceae|Burseraceae|Marantaceae|Salicaceae|Sapotaceae|Verbenaceae|Polygonaceae|Boraginaceae|Ebenaceae|Erythroxylaceae|Erythropalaceae|Chrysobalanaceae|Lygodiaceae|Asteraceae|Melastomataceae|Muntingiaceae|Myrtaceae|Lauraceae|Poaceae|Piperaceae|Fagaceae|Proteaceae|Connaraceae|Polygalaceae|Elaeocarpaceae|Solanaceae|…	23	Malpighiales|Gentianales|Sapindales|Fabales|Magnoliales|Malvales|Lamiales|Zingiberales|Ericales|Caryophyllales|Boraginales|Santalales|Schizaeales|Asterales|Myrtales|Laurales|Poales|Piperales|Fagales|Proteales|Oxalidales|Solanales|Rosales
Saturniidae	Hemileucinae	Hemileucini	Automeris	Automeris zozine	5	Lonicera|Acalypha|Ricinus|Rosa|Gossypium	5	Lonicera caprifolium|Acalypha|Ricinus communis|Rosa|Gossypium herbaceum	4	Euphorbiaceae|Malvaceae|Caprifoliaceae|Rosaceae	4	Malpighiales|Malvales|Dipsacales|Rosales	5	Acacia|Laburnum|Robinia|Quercus|Malosma	6	Acacia baileyana|Laburnum anagyroides|Robinia pseudoacacia|Quercus|Quercus robur|Malosma laurina	3	Fabaceae|Anacardiaceae|Fagaceae	3	Fabales|Sapindales|Fagales
Saturniidae	Hemileucinae	Hemileucini	Automeris	Automeris zugana	117	Clethra|Chrysophyllum|Manilkara|Styrax|Alibertia|Calycophyllum|Chomelia|Exostema|Guettarda|Pentagonia|Uncaria|Arrabidaea|Cydista|Tabebuia|Citharexylum|Gmelina|Lantana|Solanum|Cordia|Triplaris|Megathyrsus|Oryza|Rottboellia|Maranta|Musa|Ocotea|Annona|Piper|Bauhinia|Cassia|Hymenaea|Senna|Acacia|Albizia|Calliandra|Enterolobium|Inga|Mimosa|Piptadenia|Pithecellobium|Sphinga|Zygia|Acosmium|Andira|Atelei…	160	Clethra mexicana|Chrysophyllum brenesii|Manilkara chicle|Styrax argenteus|Alibertia edulis|Calycophyllum candidissimum|Chomelia spinosa|Exostema mexicanum|Guettarda macrosperma|Pentagonia donnell-smithii|Uncaria tomentosa|Arrabidaea molissima|Arrabidaea patellifera|Cydista|Cydista aequinoctialis|Cydista diversifolia|Cydista heterophylla|Tabebuia ochracea|Tabebuia rosea|Citharexylum costaricense|G…	46	Fabaceae|Euphorbiaceae|Rubiaceae|Sapindaceae|Annonaceae|Malvaceae|Bignoniaceae|Malpighiaceae|Salicaceae|Urticaceae|Ochnaceae|Sapotaceae|Verbenaceae|Clethraceae|Melastomataceae|Boraginaceae|Erythroxylaceae|Moraceae|Lamiaceae|Meliaceae|Erythropalaceae|Phyllanthaceae|Chrysobalanaceae|Lacistemataceae|Lygodiaceae|Marantaceae|Hamamelidaceae|Poaceae|Muntingiaceae|Musaceae|Myrtaceae|Lauraceae|Arecaceae|P…	24	Fabales|Malpighiales|Gentianales|Sapindales|Magnoliales|Malvales|Lamiales|Rosales|Ericales|Myrtales|Boraginales|Santalales|Schizaeales|Zingiberales|Saxifragales|Poales|Laurales|Arecales|Piperales|Fagales|Oxalidales|Solanales|Caryophyllales|Asterales	2	Laburnum|Ulmus	2	Laburnum anagyroides|Ulmus	2	Fabaceae|Ulmaceae	2	Fabales|Rosales
Saturniidae	Hemileucinae	Hemileucini	Automeris	Automeris zurobara	3	Inga|Senegalia|Coussapoa	3	Inga vera|Senegalia tenuifolia|Coussapoa nymphaeifolia	2	Urticaceae|Fabaceae	2	Rosales|Fabales	1	Inga	1	Inga vera	1	Fabaceae	1	Fabales
Saturniidae	Hemileucinae	Hemileucini	Automeropsis	Automeropsis umbrata	1	Terminalia	1	Terminalia catappa	1	Combretaceae	1	Myrtales
Saturniidae	Saturniinae	Micragonini	Basquiniana	Basquiniana cana	2	Syzygium|Pappea	4	Syzygium cordatum|Syzygium owariense|Pappea|Pappea capensis	2	Sapindaceae|Myrtaceae	2	Sapindales|Myrtales
Saturniidae	Saturniinae	Bunaeini	Bunaea	Bunaea alcinoe	33	Diospyros|Maesa|Cussonia|Panax|Lonicera|Anthocleista|Coffea|Crossopteryx|Sarcocephalus|Elaeis|Aframomum|Persea|Cananga|Piper|Acacia|Erythrina|Croton|Sapium|Bridelia|Balanites|Terminalia|Eucalyptus|Psidium|Harpephyllum|Mangifera|Schinus|Dacryodes|Ekebergia|Khaya|Platanus|Maytenus|Bauhinia|Celtis	39	Diospyros virginiana|Maesa lanceolata|Cussonia spicata|Panax|Lonicera|Anthocleista schweinfurthii|Coffea liberica|Crossopteryx febrifuga|Sarcocephalus latifolius|Elaeis guineensis|Aframomum melegueta|Persea americana|Cananga odorata|Piper umbellatum|Acacia auriculiformis|Erythrina abyssinica|Croton|Sapium ellipticum|Bridelia micrantha|Balanites aegyptiaca|Terminalia catappa|Eucalyptus|Psidium gua…	23	Fabaceae|Zingiberaceae|Gentianaceae|Zygophyllaceae|Phyllanthaceae|Annonaceae|Cannabaceae|Rubiaceae|Euphorbiaceae|Araliaceae|Burseraceae|Ebenaceae|Meliaceae|Arecaceae|Myrtaceae|Anacardiaceae|Caprifoliaceae|Primulaceae|Celastraceae|Lauraceae|Piperaceae|Platanaceae|Combretaceae	17	Fabales|Zingiberales|Gentianales|Zygophyllales|Malpighiales|Magnoliales|Rosales|Apiales|Sapindales|Ericales|Arecales|Myrtales|Dipsacales|Celastrales|Laurales|Piperales|Proteales	9	Ligustrum|Fagus|Quercus|Crataegus|Malus|Prunus|Rosa|Rhus|Tilia	11	Ligustrum|Fagus sylvatica|Quercus robur|Crataegus|Malus pumila|Prunus domestica|Prunus virginiana|Rosa|Rhus glabra|Tilia cordata|Rhus typhina	5	Rosaceae|Fagaceae|Oleaceae|Anacardiaceae|Malvaceae	5	Rosales|Fagales|Lamiales|Sapindales|Malvales
Saturniidae	Saturniinae	Bunaeini	Bunaea	Bunaea aslauga	2	Intsia|Uapaca	2	Intsia bijuga|Uapaca bojeri	2	Fabaceae|Phyllanthaceae	2	Fabales|Malpighiales
Saturniidae	Saturniinae	Bunaeini	Bunaeopsis	Bunaeopsis arabella	1	Albizia	1	Albizia sp.	1	Fabaceae	1	Fabales
Saturniidae	Saturniinae	Bunaeini	Bunaeopsis	Bunaeopsis aurantiacus	1	Bridelia	1	Bridelia micrantha	1	Phyllanthaceae	1	Malpighiales
Saturniidae	Saturniinae	Bunaeini	Bunaeopsis	Bunaeopsis bomfordi									1	Dolichos	1	Dolichos	1	Fabaceae	1	Fabales
Saturniidae	Saturniinae	Bunaeini	Bunaeopsis	Bunaeopsis hersilia	6	Chrysophyllum|Englerophytum|Hyparrhenia|Pennisetum|Irvingia|Annona	6	Chrysophyllum|Englerophytum|Hyparrhenia bracteata|Pennisetum|Irvingia|Annona senegalensis	4	Annonaceae|Sapotaceae|Poaceae|Irvingiaceae	4	Magnoliales|Ericales|Poales|Malpighiales
Saturniidae	Saturniinae	Bunaeini	Bunaeopsis	Bunaeopsis jacksoni	2	Scleria|Erythrina	2	Scleria rehmanni|Erythrina abyssinica	2	Fabaceae|Cyperaceae	2	Fabales|Poales
Saturniidae	Saturniinae	Bunaeini	Bunaeopsis	Bunaeopsis licharbas	2	Annona|Eriosema	2	Annona senegalensis|Eriosema sp.	2	Annonaceae|Fabaceae	2	Magnoliales|Fabales	2	Quercus|Salix	2	Quercus|Salix caprea	2	Fagaceae|Salicaceae	2	Fagales|Malpighiales
Saturniidae	Saturniinae	Bunaeini	Bunaeopsis	Bunaeopsis oubie	3	Euclea|Heteropogon|Sporobolus	4	Euclea sp.|Heteropogon sp.|Sporobolus sp.	2	Ebenaceae|Poaceae	2	Ericales|Poales	3	Fagus|Salix|Pycreus	3	Fagus sylvatica|Salix sp.|Pycreus muricatus	3	Fagaceae|Cyperaceae|Salicaceae	3	Fagales|Poales|Malpighiales
Saturniidae	Saturniinae	Saturniini	Cachosaturnia	Cachosaturnia cachara	1	Pterocarya	1	Pterocarya stenoptera	1	Juglandaceae	1	Fagales	4	Quercus|Juglans|Prunus|Crataegus	6	Quercus acuta|Quercus ilex|Juglans regia|Prunus laurocerasus|Quercus rubra|Crataegus monogyna	3	Rosaceae|Juglandaceae|Fagaceae	2	Rosales|Fagales
Saturniidae	Saturniinae	Saturniini	Cachosaturnia	Cachosaturnia heinrichi									2	Salix|Prunus	3	Salix babylonica|Prunus domestica|Prunus serotina	2	Rosaceae|Salicaceae	2	Rosales|Malpighiales
Saturniidae	Arsenurinae	Arsenurini	Caio	Caio championi	2	Ceiba|Pachira	4	Ceiba pentandra|Pachira aquatica|Pachira quinata|Ceiba aesculifolia	1	Malvaceae	1	Malvales	2	Tilia|Chorisia	3	Tilia sp.|Tilia sylvestris|Chorisia	1	Malvaceae	1	Malvales
Saturniidae	Arsenurinae	Arsenurini	Caio	Caio chiapasiana									1	Tilia	1	Tilia cordata	1	Malvaceae	1	Malvales
Saturniidae	Arsenurinae	Arsenurini	Caio	Caio harrietae									1	Tilia	1	Tilia cordata	1	Malvaceae	1	Malvales
Saturniidae	Arsenurinae	Arsenurini	Caio	Caio richardsoni	2	Ceiba|Chorisia	2	Ceiba pentandra|Chorisia	1	Malvaceae	1	Malvales	2	Ceiba|Chorisia	3	Ceiba sp.|Ceiba acuminata|Chorisia sp.	1	Malvaceae	1	Malvales
Saturniidae	Arsenurinae	Arsenurini	Caio	Caio romulus									1	Salix	1	Salix sp.	1	Salicaceae	1	Malpighiales
Saturniidae	Hemileucinae	Hemileucini	Callodirphia	Callodirphia arpi	3	Embelia|Myrsine|Eucalyptus	3	Embelia laeta|Myrsine coriacea|Eucalyptus sp.	2	Primulaceae|Myrtaceae	2	Ericales|Myrtales
Saturniidae	Saturniinae	Attacini	Callosamia	Callosamia angulifera	4	Laurus|Sassafras|Liriodendron|Prunus	4	Laurus nobilis|Sassafras albidum|Liriodendron tulipifera|Prunus serotina	3	Lauraceae|Magnoliaceae|Rosaceae	3	Laurales|Magnoliales|Rosales	7	Sassafras|Liriodendron|Magnolia|Salix|Malus|Prunus|Lythrum	8	Sassafras albidum|Liriodendron tulipifera|Magnolia|Magnolia tripetala|Salix caprea|Malus halliana|Prunus domestica|Lythrum salicaria	5	Magnoliaceae|Lythraceae|Rosaceae|Salicaceae|Lauraceae	5	Magnoliales|Myrtales|Rosales|Malpighiales|Laurales
Saturniidae	Saturniinae	Attacini	Callosamia	Callosamia promethea	27	Liquidambar|Diospyros|Halesia|Styrax|Symplocos|Viburnum|Cephalanthus|Fraxinus|Syringa|Laurus|Lindera|Sassafras|Liriodendron|Magnolia|Berberis|Betula|Fagus|Quercus|Myrica|Populus|Malus|Prunus|Pyrus|Tilia|Acer|Thuja|Pinus	37	Liquidambar styraciflua|Diospyros virginiana|Halesia carolina|Halesia tetraptera|Styrax americanus|Symplocos tinctoria|Viburnum|Cephalanthus occidentalis|Fraxinus|Fraxinus americana|Fraxinus pennsylvanica|Syringa|Syringa vulgaris|Laurus|Lindera benzoin|Sassafras albidum|Liriodendron tulipifera|Magnolia|Magnolia virginiana|Berberis|Betula|Fagus|Quercus|Myrica pensylvanica|Populus|Malus|Prunus|Prun…	19	Sapindaceae|Berberidaceae|Betulaceae|Rubiaceae|Ebenaceae|Fagaceae|Oleaceae|Styracaceae|Lauraceae|Altingiaceae|Magnoliaceae|Rosaceae|Myricaceae|Pinaceae|Salicaceae|Symplocaceae|Cupressaceae|Malvaceae|Adoxaceae	15	Sapindales|Ranunculales|Fagales|Gentianales|Ericales|Lamiales|Laurales|Saxifragales|Magnoliales|Rosales|Pinales|Malpighiales|Cupressales|Malvales|Dipsacales	20	Liquidambar|Kalmia|Gordonia|Viburnum|Fraxinus|Ligustrum|Syringa|Cinnamomum|Lindera|Sassafras|Liriodendron|Magnolia|Berberis|Betula|Populus|Salix|Malus|Prunus|Pyrus|Lythrum	28	Liquidambar|Liquidambar styraciflua|Kalmia|Gordonia lasianthus|Viburnum|Fraxinus|Ligustrum|Syringa|Syringa vulgaris|Cinnamomum camphora|Lindera benzoin|Sassafras albidum|Liriodendron tulipifera|Magnolia acuminata|Berberis vulgaris|Betula papyrifera|Populus|Salix|Salix caprea|Malus|Prunus|Prunus avium|Prunus cerasus|Prunus domestica|Prunus persica|Prunus serotina|Pyrus communis|Lythrum salicaria	12	Berberidaceae|Betulaceae|Lauraceae|Oleaceae|Theaceae|Ericaceae|Altingiaceae|Magnoliaceae|Lythraceae|Rosaceae|Salicaceae|Adoxaceae	11	Ranunculales|Fagales|Laurales|Lamiales|Ericales|Saxifragales|Magnoliales|Myrtales|Rosales|Malpighiales|Dipsacales
Saturniidae	Saturniinae	Attacini	Callosamia	Callosamia securifera	3	Liquidambar|Gordonia|Magnolia	3	Liquidambar styraciflua|Gordonia lasianthus|Magnolia virginiana	3	Theaceae|Altingiaceae|Magnoliaceae	3	Ericales|Saxifragales|Magnoliales	4	Gordonia|Cinnamomum|Liriodendron|Magnolia	5	Gordonia lasianthus|Cinnamomum camphora|Liriodendron tulipifera|Magnolia grandiflora|Magnolia virginiana	3	Lauraceae|Theaceae|Magnoliaceae	3	Laurales|Ericales|Magnoliales
Saturniidae	Saturniinae	Saturniini	Calosaturnia	Calosaturnia mendocino	2	Arbutus|Arctostaphylos	5	Arbutus menziesii|Arctostaphylos|Arctostaphylos glauca|Arctostaphylos patula|Arctostaphylos tomentosa	1	Ericaceae	1	Ericales	6	Arbutus|Arctostaphylos|Gaultheria|Vaccinium|Salix|Schinus	11	Arbutus menziesii|Arbutus unedo|Arctostaphylos|Arctostaphylos alpina|Arctostaphylos nevadensis|Arctostaphylos uva-ursi|Arctostaphylos viscida|Gaultheria shallon|Vaccinium corymbosum|Salix exigua|Schinus terebinthifolius	3	Ericaceae|Salicaceae|Anacardiaceae	3	Ericales|Malpighiales|Sapindales
Saturniidae	Saturniinae	Saturniini	Calosaturnia	Calosaturnia walterorum	2	Arctostaphylos|Malosma	2	Arctostaphylos sp.|Malosma laurina	2	Ericaceae|Anacardiaceae	2	Ericales|Sapindales	8	Arbutus|Arctostaphylos|Crataegus|Malosma|Pistacia|Rhus|Schinus|Ceanothus	11	Arbutus menziesii|Arctostaphylos|Crataegus|Malosma laurina|Pistacia chinensis|Rhus typhina|Schinus terebinthifolius|Ceanothus cuneatus|Rhus integrifolia|Rhus trilobata|Arbutus unedo	4	Ericaceae|Rhamnaceae|Rosaceae|Anacardiaceae	3	Ericales|Rosales|Sapindales
Saturniidae	Saturniinae	Micragonini	Campimoptilum	Campimoptilum kuntzei	8	Bauhinia|Berlinia|Brachystegia|Julbernardia|Acacia|Dichrostachys|Millettia|Deinbollia	11	Bauhinia galpinii|Berlinia|Brachystegia spiciformis|Brachystegia venosa|Julbernardia globiflora|Julbernardia magnistipulata|Julbernardia paniculata|Acacia sieberiana|Dichrostachys cinerea|Millettia|Deinbollia	2	Fabaceae|Sapindaceae	2	Fabales|Sapindales
Saturniidae	Saturniinae	Micragonini	Carnegia	Carnegia mirabilis	1	Annona	1	Annona senegalensis	1	Annonaceae	1	Magnoliales
Saturniidae	Saturniinae	Saturniini	Ceranchia	Ceranchia apollina	1	Pentopetia	1	Pentopetia androsaemifolia	1	Apocynaceae	1	Gentianales
Saturniidae	Cercophaninae	Cercophanini	Cercophana	Cercophana frauenfeldi	2	Cryptocarya|Persea	2	Cryptocarya peumus|Persea americana	1	Lauraceae	1	Laurales
Saturniidae	Cercophaninae	Cercophanini	Cercophana	Cercophana venusta	2	Maytenus|Aristotelia	2	Maytenus boaria|Aristotelia chilensis	2	Elaeocarpaceae|Celastraceae	2	Oxalidales|Celastrales
Saturniidae	Hemileucinae	Hemileucini	Cerodirphia	Cerodirphia araguensis	1	Psidium	1	Psidium guajava	1	Myrtaceae	1	Myrtales
Saturniidae	Hemileucinae	Hemileucini	Cerodirphia	Cerodirphia opis	1	Croton	1	Croton urucurana	1	Euphorbiaceae	1	Malpighiales
Saturniidae	Hemileucinae	Hemileucini	Cerodirphia	Cerodirphia peigleri									1	Quercus	1	Quercus x turneri	1	Fagaceae	1	Fagales
Saturniidae	Hemileucinae	Hemileucini	Cerodirphia	Cerodirphia rubripes	1	Anacardium	1	Anacardium occidentale	1	Anacardiaceae	1	Sapindales
Saturniidae	Hemileucinae	Hemileucini	Cerodirphia	Cerodirphia speciosa	6	Myrsine|Emmotum|Rollinia|Virola|Sclerolobium|Eugenia	6	Myrsine guianensis|Emmotum nitens|Rollinia|Virola sebifera|Sclerolobium aureum|Eugenia dysenterica	6	Metteniusaceae|Myrtaceae|Primulaceae|Annonaceae|Fabaceae|Myristicaceae	5	Metteniusales|Myrtales|Ericales|Magnoliales|Fabales
Saturniidae	Saturniinae	Bunaeini	Cinabra	Cinabra hyperbius	6	Rapanea|Faurea|Protea|Brachystegia|Julbernardia|Ekebergia	10	Rapanea melanophloeos|Faurea saligna|Protea|Protea gaguedi|Brachystegia spiciformis|Brachystegia venosa|Julbernardia globiflora|Julbernardia paniculata|Ekebergia|Ekebergia capensis	4	Fabaceae|Meliaceae|Proteaceae|Primulaceae	4	Fabales|Sapindales|Proteales|Ericales
Saturniidae	Saturniinae	Bunaeini	Cirina	Cirina butyrospermi	1	Vitellaria	1	Vitellaria paradoxa	1	Sapotaceae	1	Ericales
Saturniidae	Saturniinae	Bunaeini	Cirina	Cirina forda	29	Euclea|Manilkara|Mimusops|Sideroxylon|Vitellaria|Carissa|Diplorhynchus|Crossopteryx|Warburgia|Brachystegia|Burkea|Cassia|Erythrophleum|Isoberlinia|Julbernardia|Schotia|Acacia|Albizia|Faidherbia|Mimosa|Casuarina|Ficus|Ozoroa|Protorhus|Rhus|Schinus|Ekebergia|Hippobromus|Pappea	36	Euclea undulata|Manilkara zapota|Mimusops obovata|Sideroxylon diospyroides|Sideroxylon inerme|Vitellaria paradoxa|Carissa edulis|Carissa macrocarpa|Diplorhynchus condylocarpon|Crossopteryx febrifuga|Warburgia|Warburgia salutaris|Brachystegia glaberrima|Burkea africana|Cassia|Erythrophleum africanum|Erythrophleum lasianthum|Erythrophleum suaveolens|Isoberlinia angolensis|Julbernardia paniculata|Sc…	11	Fabaceae|Apocynaceae|Casuarinaceae|Rubiaceae|Meliaceae|Ebenaceae|Moraceae|Sapindaceae|Sapotaceae|Anacardiaceae|Canellaceae	7	Fabales|Gentianales|Fagales|Sapindales|Ericales|Rosales|Canellales	5	Aloe|Malus|Prunus|Malosma|Vitellaria	5	Aloe|Malus|Prunus domestica|Malosma laurina|Vitellaria paradoxa	4	Asphodelaceae|Anacardiaceae|Rosaceae|Sapotaceae	4	Asparagales|Sapindales|Rosales|Ericales
Saturniidae	Ceratocampinae		Citheronia	Citheronia andina									2	Malosma|Schinus	2	Malosma laurina|Schinus terebinthifolius	1	Anacardiaceae	1	Sapindales
Saturniidae	Ceratocampinae		Citheronia	Citheronia aroa									2	Prunus|Malosma	2	Prunus serotina|Malosma laurina	2	Anacardiaceae|Rosaceae	2	Sapindales|Rosales
Saturniidae	Ceratocampinae		Citheronia	Citheronia azteca									4	Quercus|Malosma|Rhus|Schinus	4	Quercus sp.|Malosma laurina|Rhus typhina|Schinus terebinthifolius	2	Anacardiaceae|Fagaceae	2	Sapindales|Fagales
Saturniidae	Ceratocampinae		Citheronia	Citheronia beledonon	1	Liquidambar	1	Liquidambar styraciflua	1	Altingiaceae	1	Saxifragales	5	Ligustrum|Gossypium|Malosma|Rhus|Schinus	5	Ligustrum|Gossypium|Malosma laurina|Rhus typhina|Schinus terebinthifolius	3	Malvaceae|Oleaceae|Anacardiaceae	3	Malvales|Lamiales|Sapindales
Saturniidae	Ceratocampinae		Citheronia	Citheronia bellavista	8	Vernonanthura|Uncaria|Zanthoxylum|Phoradendron|Lepidaploa|Tabebuia|Trema|Pachira	9	Vernonanthura patens|Uncaria tomentosa|Zanthoxylum|Zanthoxylum setulosum|Phoradendron quadrangulare|Lepidaploa tortuosa|Tabebuia rosea|Trema micrantha|Pachira quinata	7	Asteraceae|Malvaceae|Santalaceae|Bignoniaceae|Cannabaceae|Rubiaceae|Rutaceae	7	Asterales|Malvales|Santalales|Lamiales|Rosales|Gentianales|Sapindales	4	Calycophyllum|Cochlospermum|Spondias|Malosma	4	Calycophyllum candidissimum|Cochlospermum vitifolium|Spondias mombin|Malosma laurina	3	Rubiaceae|Bixaceae|Anacardiaceae	3	Gentianales|Malvales|Sapindales
Saturniidae	Ceratocampinae		Citheronia	Citheronia brissotii	12	Ilex|Escallonia|Ligustrum|Ricinus|Sapium|Prunus|Schinus|Tripodanthus|Zea|Mangifera|Lithraea|Phoradendron	15	Ilex paraguariensis|Escallonia|Ligustrum japonicum|Ricinus communis|Sapium glandulosum|Prunus brasiliensis|Schinus terebinthifolius|Tripodanthus acutifolius|Zea mays|Mangifera indica|Prunus persica|Sapium haematospermum|Lithraea brasiliensis|Schinus polygamus|Phoradendron platycaulon	9	Convolvulaceae|Aquifoliaceae|Oleaceae|Anacardiaceae|Santalaceae|Rosaceae|Euphorbiaceae|Loranthaceae|Poaceae	8	Escalloniales|Aquifoliales|Lamiales|Sapindales|Santalales|Rosales|Malpighiales|Poales	6	Ligustrum|Carya|Juglans|Ricinus|Rosa|Prunus	8	Ligustrum ovalifolium|Carya|Juglans regia|Ricinus communis|Rosa|Ligustrum japonicum|Prunus|Prunus dulcis	4	Juglandaceae|Oleaceae|Rosaceae|Euphorbiaceae	4	Fagales|Lamiales|Rosales|Malpighiales
Saturniidae	Ceratocampinae		Citheronia	Citheronia hamifera									3	Ligustrum|Salix|Terminalia	3	Ligustrum ovalifolium|Salix caprea|Terminalia catappa	3	Oleaceae|Salicaceae|Combretaceae	3	Lamiales|Malpighiales|Myrtales
Saturniidae	Ceratocampinae		Citheronia	Citheronia laocoon	20	Ilex|Vernonanthura|Zinnia|Caryocar|Acalypha|Joannesia|Ricinus|Vernicia|Rosa|Gossypium|Terminalia|Psidium|Anacardium|Diospyros|Vernonia|Zea|Juglans|Lithraea|Schinus|Cupressus	25	Ilex paraguariensis|Vernonanthura ferruginea|Zinnia elegans|Caryocar brasiliense|Acalypha sp.|Joannesia princeps|Ricinus communis|Vernicia fordii|Rosa sp.|Gossypium herbaceum|Terminalia catappa|Psidium guajava|Psidium guineense|Anacardium occidentale|Diospyros kaki|Vernonanthura phosphorica|Vernonia sp.|Vernonia tweedieana|Zea mays|Juglans nigra|Psidium cinereum|Lithraea brasiliensis|Schinus poly…	13	Euphorbiaceae|Anacardiaceae|Caryocaraceae|Cupressaceae|Ebenaceae|Malvaceae|Aquifoliaceae|Juglandaceae|Myrtaceae|Rosaceae|Combretaceae|Asteraceae|Poaceae	11	Malpighiales|Sapindales|Cupressales|Ericales|Malvales|Aquifoliales|Fagales|Myrtales|Rosales|Asterales|Poales	2	Ligustrum|Schinus	2	Ligustrum ovalifolium|Schinus terebinthifolius	2	Oleaceae|Anacardiaceae	2	Lamiales|Sapindales
Saturniidae	Ceratocampinae		Citheronia	Citheronia lobesis	11	Calycophyllum|Maclura|Pachira|Cochlospermum|Eugenia|Psidium|Spondias|Bursera|Zanthoxylum|Phoradendron|Sapium	12	Calycophyllum candidissimum|Maclura tinctoria|Pachira quinata|Cochlospermum vitifolium|Eugenia salamensis|Psidium guajava|Spondias mombin|Spondias purpurea|Bursera simaruba|Zanthoxylum setulosum|Phoradendron quadrangulare|Sapium glandulosum	10	Burseraceae|Rubiaceae|Bixaceae|Myrtaceae|Moraceae|Malvaceae|Santalaceae|Euphorbiaceae|Anacardiaceae|Rutaceae	7	Sapindales|Gentianales|Malvales|Myrtales|Rosales|Santalales|Malpighiales
Saturniidae	Ceratocampinae		Citheronia	Citheronia maureillei									4	Liquidambar|Salix|Malosma|Schinus	4	Liquidambar styraciflua|Salix caprea|Malosma laurina|Schinus terebinthifolius	3	Altingiaceae|Anacardiaceae|Salicaceae	3	Saxifragales|Sapindales|Malpighiales
Saturniidae	Ceratocampinae		Citheronia	Citheronia mexicana									6	Ligustrum|Carya|Juglans|Malus|Tilia|Thuja	7	Ligustrum|Carya|Juglans|Juglans regia|Malus domestica|Tilia|Thuja	5	Juglandaceae|Oleaceae|Rosaceae|Cupressaceae|Malvaceae	5	Fagales|Lamiales|Rosales|Cupressales|Malvales
Saturniidae	Ceratocampinae		Citheronia	Citheronia phoronea	2	Myrsine|Maprounea	2	Myrsine guianensis|Maprounea guianensis	2	Euphorbiaceae|Primulaceae	2	Malpighiales|Ericales	3	Prunus|Bixa|Malosma	3	Prunus serotina|Bixa orellana|Malosma laurina	3	Bixaceae|Anacardiaceae|Rosaceae	3	Malvales|Sapindales|Rosales
Saturniidae	Ceratocampinae		Citheronia	Citheronia pseudomexicana									2	Malosma|Schinus	2	Malosma laurina|Schinus terebinthifolius	1	Anacardiaceae	1	Sapindales
Saturniidae	Ceratocampinae		Citheronia	Citheronia regalis	14	Liquidambar|Nyssa|Diospyros|Oxydendrum|Cephalanthus|Fraxinus|Syringa|Sassafras|Platanus|Carya|Juglans|Prunus|Gossypium|Rhus	24	Liquidambar styraciflua|Nyssa sylvatica|Diospyros virginiana|Oxydendrum arboreum|Cephalanthus occidentalis|Fraxinus|Fraxinus americana|Syringa vulgaris|Sassafras albidum|Platanus|Platanus occidentalis|Platanus orientalis|Carya|Carya illinoinensis|Juglans|Juglans cinerea|Juglans nigra|Prunus domestica|Gossypium|Gossypium barbadense|Gossypium herbaceum|Rhus|Rhus copallina|Rhus typhina	12	Juglandaceae|Rubiaceae|Ebenaceae|Oleaceae|Malvaceae|Altingiaceae|Nyssaceae|Ericaceae|Platanaceae|Rosaceae|Anacardiaceae|Lauraceae	11	Fagales|Gentianales|Ericales|Lamiales|Malvales|Saxifragales|Cornales|Proteales|Rosales|Sapindales|Laurales	17	Liquidambar|Diospyros|Diervilla|Fraxinus|Ligustrum|Syringa|Platanus|Corylus|Quercus|Juglans|Salix|Prunus|Lythrum|Rhus|Schinus|Carya|Malosma	22	Liquidambar styraciflua|Diospyros virginiana|Diervilla|Fraxinus|Ligustrum|Syringa|Platanus occidentalis|Corylus avellana|Quercus|Juglans cinerea|Juglans nigra|Juglans regia|Salix|Prunus domestica|Prunus serotina|Lythrum salicaria|Rhus cismontana|Rhus copallina|Rhus glabra|Schinus terebinthifolius|Carya glabra|Malosma laurina	12	Juglandaceae|Betulaceae|Caprifoliaceae|Ebenaceae|Oleaceae|Altingiaceae|Lythraceae|Anacardiaceae|Platanaceae|Rosaceae|Fagaceae|Salicaceae	10	Fagales|Dipsacales|Ericales|Lamiales|Saxifragales|Myrtales|Sapindales|Proteales|Rosales|Malpighiales
Saturniidae	Ceratocampinae		Citheronia	Citheronia sepulcralis	1	Pinus	7	Pinus|Pinus caribaea|Pinus clausa|Pinus echinata|Pinus resinosa|Pinus rigida|Pinus strobus	1	Pinaceae	1	Pinales	1	Pinus	7	Pinus halepensis|Pinus mugo|Pinus nigra|Pinus rigida|Pinus strobus|Pinus sylvestris|Pinus ponderosa	1	Pinaceae	1	Pinales
Saturniidae	Ceratocampinae		Citheronia	Citheronia splendens	4	Arctostaphylos|Juglans|Gossypium|Rhus	5	Arctostaphylos pungens|Juglans|Gossypium thurberi|Rhus choriophylla|Rhus trilobata	4	Ericaceae|Malvaceae|Juglandaceae|Anacardiaceae	4	Ericales|Malvales|Fagales|Sapindales	9	Carya|Juglans|Liquidambar|Malosma|Pistacia|Schinus|Pinus|Rhus|Arbutus	15	Carya illinoinensis|Juglans cinerea|Juglans regia|Liquidambar styraciflua|Carya|Juglans nigra|Malosma laurina|Pistacia lentiscus|Schinus terebinthifolius|Pinus radiata|Rhus|Schinus molle|Arbutus menziesii|Carya glabra|Rhus typhina	5	Ericaceae|Juglandaceae|Altingiaceae|Anacardiaceae|Pinaceae	5	Ericales|Fagales|Saxifragales|Sapindales|Pinales
Saturniidae	Ceratocampinae		Citheronia	Citheronia vogleri	6	Eucalyptus|Lithraea|Schinus|Ligaria|Tripodanthus|Jodina	7	Eucalyptus|Lithraea brasiliensis|Lithraea molleoides|Schinus polygamus|Ligaria cuneifolia|Tripodanthus acutifolius|Jodina rhombifolia	4	Myrtaceae|Santalaceae|Loranthaceae|Anacardiaceae	3	Myrtales|Santalales|Sapindales	1	Lithraea	1	Lithraea molleoides	1	Anacardiaceae	1	Sapindales
Saturniidae	Ceratocampinae		Citheronioides	Citheronioides collaris	11	Chimarrhis|Chione|Cestrum|Cordia|Acalypha|Hyeronima|Prunus|Hampea|Heliocarpus|Henriettea|Miconia	12	Chimarrhis parviflora|Chione sylvicola|Cestrum racemosum|Cordia stellifera|Acalypha diversifolia|Hyeronima|Prunus annularis|Hampea appendiculata|Heliocarpus appendiculatus|Henriettea|Miconia affinis|Miconia trinervia	8	Euphorbiaceae|Solanaceae|Rubiaceae|Boraginaceae|Malvaceae|Melastomataceae|Phyllanthaceae|Rosaceae	7	Malpighiales|Solanales|Gentianales|Boraginales|Malvales|Myrtales|Rosales
Saturniidae	Ceratocampinae		Citheronioides	Citheronioides lamata	21	Saurauia|Terminalia|Cordia|Acalypha|Conceveiba|Pera|Lacistema|Lozania|Vitex|Hampea|Heliocarpus|Conostegia|Miconia|Myrcia|Hieronyma|Ardisia|Prunus|Chimarrhis|Chione|Cestrum|Vochysia	25	Saurauia montana|Terminalia amazonia|Terminalia bucidoides|Cordia croatii|Cordia stellifera|Acalypha diversifolia|Conceveiba pleiostemona|Pera arborea|Lacistema aggregatum|Lozania pittieri|Vitex cooperi|Hampea appendiculata|Heliocarpus appendiculatus|Conostegia micrantha|Conostegia xalapensis|Miconia affinis|Miconia trinervia|Myrcia splendens|Hieronyma oblonga|Ardisia standleyana|Prunus annularis…	16	Euphorbiaceae|Primulaceae|Solanaceae|Rubiaceae|Melastomataceae|Boraginaceae|Malvaceae|Phyllanthaceae|Lacistemataceae|Myrtaceae|Peraceae|Rosaceae|Actinidiaceae|Combretaceae|Lamiaceae|Vochysiaceae	9	Malpighiales|Ericales|Solanales|Gentianales|Myrtales|Boraginales|Malvales|Rosales|Lamiales
Saturniidae	Ceratocampinae		Citheronula	Citheronula armata									1	Anacardium	1	Anacardium occidentale	1	Anacardiaceae	1	Sapindales
Saturniidae	Ceratocampinae		Citioica	Citioica anthonilis	1	Piptadenia	1	Piptadenia gonoacantha	1	Fabaceae	1	Fabales	2	Robinia|Salix	2	Robinia pseudoacacia|Salix caprea	2	Fabaceae|Salicaceae	2	Fabales|Malpighiales
Saturniidae	Hemileucinae	Hemileucini	Coloradia	Coloradia doris	1	Pinus	3	Pinus sp.|Pinus edulis|Pinus ponderosa	1	Pinaceae	1	Pinales	1	Pinus	1	Pinus strobus	1	Pinaceae	1	Pinales
Saturniidae	Hemileucinae	Hemileucini	Coloradia	Coloradia luski									1	Pinus	1	Pinus strobus	1	Pinaceae	1	Pinales
Saturniidae	Hemileucinae	Hemileucini	Coloradia	Coloradia pandora	1	Pinus	8	Pinus contorta|Pinus echinata|Pinus ponderosa|Pinus coulteri|Pinus engelmannii|Pinus jeffreyi|Pinus lambertiana|Pinus palustris	1	Pinaceae	1	Pinales	1	Pinus	5	Pinus strobus|Pinus sylvestris|Pinus palustris|Pinus ponderosa|Pinus thunbergii	1	Pinaceae	1	Pinales
Saturniidae	Hemileucinae	Hemileucini	Coloradia	Coloradia velda									1	Pinus	7	Pinus edulis|Pinus jeffreyi|Pinus monophylla|Pinus radiata|Pinus strobus|Pinus sylvestris|Pinus thunbergii	1	Pinaceae	1	Pinales
Saturniidae	Saturniinae	Saturniini	Copaxa	Copaxa andensis									1	Persea	2	Persea sp.|Persea americana	1	Lauraceae	1	Laurales
Saturniidae	Saturniinae	Saturniini	Copaxa	Copaxa andpichinchensis									1	Persea	1	Persea americana	1	Lauraceae	1	Laurales
Saturniidae	Saturniinae	Saturniini	Copaxa	Copaxa australoescalantei	2	Nectandra|Persea	3	Nectandra hihua|Nectandra martinicensis|Persea americana	1	Lauraceae	1	Laurales
Saturniidae	Saturniinae	Saturniini	Copaxa	Copaxa canella	2	Laurus|Nectandra	4	Laurus nobilis|Nectandra|Nectandra reticulata|Nectandra venulosa	1	Lauraceae	1	Laurales
Saturniidae	Saturniinae	Saturniini	Copaxa	Copaxa carolinae									2	Persea|Coriaria	2	Persea americana|Coriaria ruscifolia	2	Coriariaceae|Lauraceae	2	Cucurbitales|Laurales
Saturniidae	Saturniinae	Saturniini	Copaxa	Copaxa ciseskii									1	Coriaria	1	Coriaria ruscifolia	1	Coriariaceae	1	Cucurbitales
Saturniidae	Saturniinae	Saturniini	Copaxa	Copaxa curvilinea	4	Nectandra|Persea|Licaria|Ocotea	10	Nectandra hihua|Nectandra martinicensis|Nectandra purpurea|Nectandra umbrosa|Persea americana|Persea schiedeana|Licaria misantlae|Ocotea insularis|Ocotea leucoxylon|Ocotea mollifolia	1	Lauraceae	1	Laurales
Saturniidae	Saturniinae	Saturniini	Copaxa	Copaxa cydippe									1	Pinus	3	Pinus nigra|Pinus radiata|Pinus thunbergii	1	Pinaceae	1	Pinales
Saturniidae	Saturniinae	Saturniini	Copaxa	Copaxa dagmarae									1	Coriaria	1	Coriaria ruscifolia	1	Coriariaceae	1	Cucurbitales
Saturniidae	Saturniinae	Saturniini	Copaxa	Copaxa decrescens	3	Jacaranda|Nectandra|Persea	3	Jacaranda caroba|Nectandra sp.|Persea americana	2	Bignoniaceae|Lauraceae	2	Lamiales|Laurales	2	Persea|Salix	2	Persea americana|Salix sp.	2	Lauraceae|Salicaceae	2	Laurales|Malpighiales
Saturniidae	Saturniinae	Saturniini	Copaxa	Copaxa denda									2	Persea|Quercus	3	Persea sp.|Persea americana|Quercus sp.	2	Lauraceae|Fagaceae	2	Laurales|Fagales
Saturniidae	Saturniinae	Saturniini	Copaxa	Copaxa denhezi									1	Persea	1	Persea americana	1	Lauraceae	1	Laurales
Saturniidae	Saturniinae	Saturniini	Copaxa	Copaxa escalantei	4	Hernandia|Nectandra|Ocotea|Persea	7	Hernandia stenura|Nectandra hihua|Nectandra martinicensis|Nectandra umbrosa|Ocotea gomezii|Ocotea whitei|Persea schiedeana	2	Hernandiaceae|Lauraceae	1	Laurales	1	Persea	2	Persea sp.|Persea americana	1	Lauraceae	1	Laurales
Saturniidae	Saturniinae	Saturniini	Copaxa	Copaxa flavina	1	Phoebe	1	Phoebe porphyria	1	Lauraceae	1	Laurales
Saturniidae	Saturniinae	Saturniini	Copaxa	Copaxa flavobrunnea									1	Persea	1	Persea americana	1	Lauraceae	1	Laurales
Saturniidae	Saturniinae	Saturniini	Copaxa	Copaxa garciorum									2	Persea|Salix	2	Persea americana|Salix caprea	2	Lauraceae|Salicaceae	2	Laurales|Malpighiales
Saturniidae	Saturniinae	Saturniini	Copaxa	Copaxa joinvillea									1	Persea	1	Persea americana	1	Lauraceae	1	Laurales
Saturniidae	Saturniinae	Saturniini	Copaxa	Copaxa lavendera	1	Schinus	1	Schinus molle	1	Anacardiaceae	1	Sapindales	6	Cinnamomum|Persea|Quercus|Salix|Malosma|Rhus	8	Cinnamomum camphora|Persea|Persea americana|Quercus|Quercus ilex?|Salix babylonica|Malosma laurina|Rhus trilobata	4	Lauraceae|Anacardiaceae|Fagaceae|Salicaceae	4	Laurales|Sapindales|Fagales|Malpighiales
Saturniidae	Saturniinae	Saturniini	Copaxa	Copaxa litensis									1	Persea	1	Persea americana	1	Lauraceae	1	Laurales
Saturniidae	Saturniinae	Saturniini	Copaxa	Copaxa lunula									1	Persea	1	Persea americana	1	Lauraceae	1	Laurales
Saturniidae	Saturniinae	Saturniini	Copaxa	Copaxa mannana									1	Quercus	8	Quercus agrifolia|Quercus chrysolepis|Quercus gambelii|Quercus ilex|Quercus kelloggii|Quercus lobata|Quercus robur|Quercus suber	1	Fagaceae	1	Fagales
Saturniidae	Saturniinae	Saturniini	Copaxa	Copaxa marquezae									1	Persea	1	Persea americana	1	Lauraceae	1	Laurales
Saturniidae	Saturniinae	Saturniini	Copaxa	Copaxa mazaorum									2	Persea|Prunus	2	Persea americana|Prunus sp.	2	Lauraceae|Rosaceae	2	Laurales|Rosales
Saturniidae	Saturniinae	Saturniini	Copaxa	Copaxa medea	1	Pinus	1	Pinus radiata	1	Pinaceae	1	Pinales
Saturniidae	Saturniinae	Saturniini	Copaxa	Copaxa moinieri	5	Cinnamomum|Licaria|Nectandra|Ocotea|Persea	16	Cinnamomum triplinerve|Licaria|Nectandra belizensis|Nectandra salicifolia|Ocotea|Ocotea atirrensis|Ocotea cernua|Ocotea veraguensis|Persea americana|Cinnamomum brenesii|Nectandra salicina|Nectandra smithii|Nectandra umbrosa|Ocotea paulii|Ocotea smithii|Ocotea whitei	1	Lauraceae	1	Laurales
Saturniidae	Saturniinae	Saturniini	Copaxa	Copaxa muellerana									1	Quercus	1	Quercus sp.	1	Fagaceae	1	Fagales
Saturniidae	Saturniinae	Saturniini	Copaxa	Copaxa multifenestrata	1	Persea	1	Persea americana	1	Lauraceae	1	Laurales	3	Liquidambar|Persea|Salix	3	Liquidambar styraciflua|Persea americana|Salix caprea	3	Altingiaceae|Lauraceae|Salicaceae	3	Saxifragales|Laurales|Malpighiales
Saturniidae	Saturniinae	Saturniini	Copaxa	Copaxa niepelti									1	Persea	1	Persea americana	1	Lauraceae	1	Laurales
Saturniidae	Saturniinae	Saturniini	Copaxa	Copaxa orientalis									1	Brachyotum	1	Brachyotum ledifolium	1	Melastomataceae	1	Myrtales
Saturniidae	Saturniinae	Saturniini	Copaxa	Copaxa pararufinans									1	Persea	1	Persea americana	1	Lauraceae	1	Laurales
Saturniidae	Saturniinae	Saturniini	Copaxa	Copaxa rufinans	7	Cinnamomum|Licaria|Nectandra|Ocotea|Persea|Beilschmiedia|Pleurothyrium	27	Cinnamomum|Cinnamomum brenesii|Cinnamomum triplinerve|Licaria|Nectandra hihua|Nectandra martinicensis|Nectandra membranacea|Nectandra salicifolia|Nectandra salicina|Ocotea|Ocotea insularis|Ocotea mollifolia|Ocotea veraguensis|Persea americana|Beilschmiedia brenesii|Nectandra smithii|Nectandra umbrosa|Ocotea cernua|Ocotea hartshorniana|Ocotea hihua|Ocotea leucoxylon|Ocotea rufescens|Ocotea smithii…	1	Lauraceae	1	Laurales	6	Cinnamomum|Persea|Quercus|Prunus|Malosma|Rhus	6	Cinnamomum camphora|Persea americana|Quercus|Prunus|Malosma laurina|Rhus	4	Lauraceae|Anacardiaceae|Rosaceae|Fagaceae	4	Laurales|Sapindales|Rosales|Fagales
Saturniidae	Saturniinae	Saturniini	Copaxa	Copaxa sapatoza	1	Alnus	1	Alnus acuminata	1	Betulaceae	1	Fagales	2	Persea|Alnus	3	Persea americana|Alnus acuminata|Alnus rhombifolia	2	Betulaceae|Lauraceae	2	Fagales|Laurales
Saturniidae	Saturniinae	Saturniini	Copaxa	Copaxa satellita	1	Persea	1	Persea americana	1	Lauraceae	1	Laurales
Saturniidae	Saturniinae	Saturniini	Copaxa	Copaxa satellitoidea									1	Persea	1	Persea americana	1	Lauraceae	1	Laurales
Saturniidae	Saturniinae	Saturniini	Copaxa	Copaxa semioculata	1	Pinus	1	Pinus radiata	1	Pinaceae	1	Pinales	2	Persea|Quercus	2	Persea americana|Quercus sp.	2	Lauraceae|Fagaceae	2	Laurales|Fagales
Saturniidae	Saturniinae	Saturniini	Copaxa	Copaxa simoni									2	Persea|Coriaria	2	Persea americana|Coriaria ruscifolia	2	Coriariaceae|Lauraceae	2	Cucurbitales|Laurales
Saturniidae	Saturniinae	Saturniini	Copaxa	Copaxa simson									1	Persea	1	Persea americana	1	Lauraceae	1	Laurales
Saturniidae	Saturniinae	Saturniini	Copaxa	Copaxa syntheratoides									1	Crataegus	1	Crataegus sp.	1	Rosaceae	1	Rosales
Saturniidae	Saturniinae	Saturniini	Copaxa	Copaxa troetschi	1	Persea	1	Persea schiediana	1	Lauraceae	1	Laurales
Saturniidae	Saturniinae	Saturniini	Copiopteryx	Copiopteryx jehovah									3	Manilkara|Micropholis|Pouteria	4	Manilkara sp.|Manilkara zapota|Micropholis guyanensis|Pouteria caimito	1	Sapotaceae	1	Ericales
Saturniidae	Saturniinae	Saturniini	Copiopteryx	Copiopteryx semiramis	3	Manilkara|Pouteria|Acanthosyris	3	Manilkara chicle|Pouteria caimito|Acanthosyris spinescens	2	Santalaceae|Sapotaceae	2	Santalales|Ericales	2	Manilkara|Pouteria	3	Manilkara zapota|Pouteria caimito|Pouteria ramiflora	1	Sapotaceae	1	Ericales
Saturniidae	Arsenurinae	Arsenurini	Copiopteryx	Copiopteryx sonthonnaxi	1	Mimusops	1	Mimusops sp.	1	Sapotaceae	1	Ericales
Saturniidae	Saturniinae	Attacini	Coscinocera	Coscinocera hercules	5	Polyscias|Timonius|Homalanthus|Glochidion|Dysoxylum	10	Polyscias elegans|Timonius singularis|Timonius timon|Homalanthus nutans|Homalanthus populifolius|Glochidion ferdinandi|Dysoxylum arborescens|Dysoxylum muelleri|Dysoxylum nernstii|Dysoxylum pettigrewianum	5	Meliaceae|Phyllanthaceae|Euphorbiaceae|Araliaceae|Rubiaceae	4	Sapindales|Malpighiales|Apiales|Gentianales	8	Ligustrum|Syringa|Betula|Juglans|Salix|Prunus|Dysoxylum|Ailanthus	10	Ligustrum|Ligustrum ovalifolium|Syringa|Syringa vulgaris|Betula pendula|Juglans regia|Salix|Prunus serotina|Dysoxylum|Ailanthus altissima	7	Simaroubaceae|Betulaceae|Meliaceae|Juglandaceae|Oleaceae|Rosaceae|Salicaceae	5	Sapindales|Fagales|Lamiales|Rosales|Malpighiales
Saturniidae	Saturniinae	Saturniini	Cricula	Cricula andamanica									2	Anacardium|Pometia	2	Anacardium occidentale|Pometia pinnata	2	Anacardiaceae|Sapindaceae	1	Sapindales
Saturniidae	Saturniinae	Saturniini	Cricula	Cricula andrei									16	Ribes|Rhododendron|Nerium|Ligustrum|Syringa|Euonymus|Quercus|Salix|Crataegus|Malus|Prunus|Pyrus|Rosa|Tilia|Parthenocissus|Vitis	22	Ribes|Rhododendron ponticum|Nerium oleander|Ligustrum|Ligustrum ovalifolium|Ligustrum vulgare|Syringa vulgaris|Euonymus japonicus|Quercus|Quercus robur|Salix|Crataegus|Malus|Malus domestica|Prunus cerasus|Prunus domestica|Pyrus communis|Rosa|Tilia|Parthenocissus quinquefolia|Vitis vinifera|Prunus avium	10	Rosaceae|Celastraceae|Oleaceae|Apocynaceae|Vitaceae|Fagaceae|Ericaceae|Grossulariaceae|Salicaceae|Malvaceae	10	Rosales|Celastrales|Lamiales|Gentianales|Vitales|Fagales|Ericales|Saxifragales|Malpighiales|Malvales
Saturniidae	Saturniinae	Saturniini	Cricula	Cricula cameronensis									1	Rhododendron	1	Rhododendron	1	Ericaceae	1	Ericales
Saturniidae	Saturniinae	Saturniini	Cricula	Cricula elaezia	2	Cinchona|Canarium	2	Cinchona sp.|Canarium sp.	2	Burseraceae|Rubiaceae	2	Sapindales|Gentianales
Saturniidae	Saturniinae	Saturniini	Cricula	Cricula hayatiae	2	Persea|Psidium	2	Persea americana|Psidium guajava	2	Lauraceae|Myrtaceae	2	Laurales|Myrtales	1	Malus	1	Malus sp.	1	Rosaceae	1	Rosales
Saturniidae	Saturniinae	Saturniini	Cricula	Cricula jordani	3	Malus|Prunus|Pyrus	4	Malus asiatica|Malus pumila|Prunus persica|Pyrus bretschneideri	1	Rosaceae	1	Rosales
Saturniidae	Saturniinae	Saturniini	Cricula	Cricula trifenestrata	36	Cinchona|Cinnamomum|Litsea|Ziziphus|Semecarpus|Altingia|Exbucklandia|Camellia|Persea|Acrocarpus|Acacia|Bischofia|Pyrus|Terminalia|Syzygium|Gluta|Mangifera|Litchi|Schleichera|Anacardium|Psidium|Protium|Theobroma|Canarium|Careya|Amomum|Actinodaphne|Magnolia|Celastrus|Xylia|Arachis|Betula|Salix|Elaeocarpus|Prunus|Spondias	55	Cinchona sp.|Cinnamomum zeylanicum|Litsea cubeba|Ziziphus jujuba|Semecarpus anacardium|Altingia excelsa|Exbucklandia populnea|Camellia sinensis|Litsea chinensis|Persea americana|Acrocarpus fraxinifolius|Acacia catechu|Bischofia sp.|Bischofia javanica|Ziziphus mauritiana|Pyrus sp.|Terminalia sp.|Syzygium fruticosum|Gluta sp.|Mangifera sp.|Mangifera indica|Semecarpus pandurata|Litchi chinensis|Schl…	22	Fabaceae|Lauraceae|Altingiaceae|Zingiberaceae|Anacardiaceae|Betulaceae|Phyllanthaceae|Theaceae|Burseraceae|Lecythidaceae|Celastraceae|Rubiaceae|Elaeocarpaceae|Hamamelidaceae|Sapindaceae|Magnoliaceae|Rosaceae|Myrtaceae|Salicaceae|Combretaceae|Malvaceae|Rhamnaceae	15	Fabales|Laurales|Saxifragales|Zingiberales|Sapindales|Fagales|Malpighiales|Ericales|Celastrales|Gentianales|Oxalidales|Magnoliales|Rosales|Myrtales|Malvales	28	Ligustrum|Quercus|Malus|Tilia|Altingia|Rhododendron|Careya|Camellia|Elettaria|Cinnamomum|Litsea|Persea|Piper|Acrocarpus|Betula|Bischofia|Salix|Ziziphus|Crataegus|Prunus|Pyrus|Eucalyptus|Anacardium|Mangifera|Spondias|Canarium|Litchi|Schleichera	37	Ligustrum vulgare|Quercus robur|Malus domestica|Tilia|Altingia chinensis|Rhododendron|Careya arborea|Camellia sinensis|Elettaria cardamomum|Cinnamomum glanduliferum|Cinnamomum glaucescens|Cinnamomum zeylanicum|Litsea cubeba|Persea bombycina|Piper nigrum|Acrocarpus fraxinifolius|Betula alnoides|Quercus|Quercus ilex|Quercus serrata|Bischofia javanica|Salix|Salix babylonica|Ziziphus jujuba|Crataegus…	20	Fabaceae|Altingiaceae|Anacardiaceae|Betulaceae|Phyllanthaceae|Theaceae|Burseraceae|Lecythidaceae|Lauraceae|Rosaceae|Zingiberaceae|Myrtaceae|Oleaceae|Sapindaceae|Piperaceae|Fagaceae|Ericaceae|Salicaceae|Malvaceae|Rhamnaceae	13	Fabales|Saxifragales|Sapindales|Fagales|Malpighiales|Ericales|Laurales|Rosales|Zingiberales|Myrtales|Lamiales|Piperales|Malvales
Saturniidae	Saturniinae	Micragonini	Cyrtogone	Cyrtogone colettae	2	Brachystegia|Julbernardia	2	Brachystegia spiciformis|Julbernardia paniculata	1	Fabaceae	1	Fabales
Saturniidae	Saturniinae	Micragonini	Cyrtogone	Cyrtogone herilla	1	Annona	1	Annona sp.	1	Annonaceae	1	Magnoliales
Saturniidae	Saturniinae	Micragonini	Cyrtogone	Cyrtogone nyasae									1	Schinus	2	Schinus molle|Schinus terebinthifolius	1	Anacardiaceae	1	Sapindales
Saturniidae	Saturniinae	Micragonini	Decachorda	Decachorda inspersa	1	Chloris	1	Chloris virgata	1	Poaceae	1	Poales
Saturniidae	Saturniinae	Micragonini	Decachorda	Decachorda rosea	1	Hyparrhenia	1	Hyparrhenia sp.	1	Poaceae	1	Poales
Saturniidae	Hemileucinae	Hemileucini	Dirphia		2	Anacardium|Schinus	2	Anacardium occidentale|Schinus terebinthifolius	1	Anacardiaceae	1	Sapindales
Saturniidae	Hemileucinae	Hemileucini	Dirphia	Dirphia araucariae	1	Araucaria	1	Araucaria angustifolia	1	Araucariaceae	1	Araucariales
Saturniidae	Hemileucinae	Hemileucini	Dirphia	Dirphia avia	13	Hymenaea|Pterodon|Quercus|Spondias|Cedrela|Guarea|Swietenia|Annona|Tamarindus|Ficus|Rosa|Anacardium|Pterocarpus	15	Hymenaea courbaril|Pterodon emarginatus|Quercus oleoides|Spondias mombin|Cedrela odorata|Guarea glabra|Swietenia macrophylla|Annona muricata|Tamarindus indica|Ficus benjamina|Rosa sp.|Anacardium occidentale|Cedrela fissilis|Pterocarpus rohrii|Guarea excelsa	7	Anacardiaceae|Annonaceae|Meliaceae|Moraceae|Fabaceae|Fagaceae|Rosaceae	5	Sapindales|Magnoliales|Rosales|Fabales|Fagales	9	Fagus|Quercus|Populus|Salix|Crataegus|Malus|Prunus|Malosma|Schinus	11	Fagus sylvatica|Quercus|Quercus ilex|Populus nigra|Salix|Salix caprea|Crataegus monogyna|Malus|Prunus|Malosma laurina|Schinus terebinthifolius	4	Rosaceae|Fagaceae|Anacardiaceae|Salicaceae	4	Rosales|Fagales|Sapindales|Malpighiales
Saturniidae	Hemileucinae	Hemileucini	Dirphia	Dirphia avrilae	1	Mangifera	1	Mangifera indica	1	Anacardiaceae	1	Sapindales
Saturniidae	Hemileucinae	Hemileucini	Dirphia	Dirphia barinasensis									2	Salix|Prunus	2	Salix caprea|Prunus spinosa	2	Rosaceae|Salicaceae	2	Rosales|Malpighiales
Saturniidae	Hemileucinae	Hemileucini	Dirphia	Dirphia baroma	2	Myrsine|Lithraea	2	Myrsine umbellata|Lithraea brasiliensis	2	Anacardiaceae|Primulaceae	2	Sapindales|Ericales	2	Fagus|Quercus	2	Fagus sylvatica|Quercus ilex	1	Fagaceae	1	Fagales
Saturniidae	Hemileucinae	Hemileucini	Dirphia	Dirphia crassifurca									1	Malosma	1	Malosma laurina	1	Anacardiaceae	1	Sapindales
Saturniidae	Hemileucinae	Hemileucini	Dirphia	Dirphia curitiba									5	Robinia|Fagus|Quercus|Juglans|Prunus	6	Robinia pseudoacacia|Fagus sylvatica|Quercus ilex|Quercus robur|Juglans regia|Prunus persica	4	Fagaceae|Juglandaceae|Rosaceae|Fabaceae	3	Fagales|Rosales|Fabales
Saturniidae	Hemileucinae	Hemileucini	Dirphia	Dirphia horcana	14	Cavendishia|Gonocalyx|Vaccinium|Schwartzia|Ardisia|Myrsine|Panopsis|Chrysochlamys|Weinmannia|Conostegia|Miconia|Sapium|Blakea|Eugenia	19	Cavendishia bracteata|Gonocalyx pterocarpus|Vaccinium poasanum|Schwartzia costaricensis|Ardisia crassiramea|Myrsine coriacea|Panopsis suaveolens|Chrysochlamys psychotriifolia|Weinmannia wercklei|Conostegia montana|Miconia lonchophylla|Miconia tonduzii|Chrysochlamys allenii|Weinmannia pinnata|Sapium glandulosum|Blakea chlorantha|Miconia brenesii|Miconia grayum|Eugenia glandulosopunctata	9	Primulaceae|Melastomataceae|Ericaceae|Clusiaceae|Myrtaceae|Proteaceae|Euphorbiaceae|Marcgraviaceae|Cunoniaceae	5	Ericales|Myrtales|Malpighiales|Proteales|Oxalidales
Saturniidae	Hemileucinae	Hemileucini	Dirphia	Dirphia lichyi	3	Syzygium|Anacardium|Mangifera	4	Syzygium jambos|Syzygium malaccense|Anacardium excelsum|Mangifera indica	2	Anacardiaceae|Myrtaceae	2	Sapindales|Myrtales	2	Salix|Prunus	4	Salix caprea|Salix fragilis|Salix viminalis|Prunus spinosa	2	Rosaceae|Salicaceae	2	Rosales|Malpighiales
Saturniidae	Hemileucinae	Hemileucini	Dirphia	Dirphia moderata	6	Myrsine|Connarus|Anacardium|Schinus|Peltophorum|Lithraea	12	Myrsine umbellata|Connarus suberosus|Anacardium occidentale|Schinus terebinthifolius|Myrsine laetevirens|Myrsine parvula|Peltophorum dubium|Lithraea|Lithraea molleoides|Schinus gracilipes|Schinus latifolius|Schinus polygamus	4	Anacardiaceae|Connaraceae|Primulaceae|Fabaceae	4	Sapindales|Oxalidales|Ericales|Fabales	1	Schinus	1	Schinus terebinthifolius	1	Anacardiaceae	1	Sapindales
Saturniidae	Hemileucinae	Hemileucini	Dirphia	Dirphia monticola	1	Myrsine	1	Myrsine coriacea	1	Primulaceae	1	Ericales
Saturniidae	Hemileucinae	Hemileucini	Dirphia	Dirphia napoensis									1	Senna	1	Senna didymobotrya	1	Fabaceae	1	Fabales
Saturniidae	Hemileucinae	Hemileucini	Dirphia	Dirphia panamensis									4	Malosma|Schinus|Robinia|Salix	4	Malosma laurina|Schinus terebinthifolius|Robinia pseudoacacia|Salix sp.	3	Anacardiaceae|Fabaceae|Salicaceae	3	Sapindales|Fabales|Malpighiales
Saturniidae	Hemileucinae	Hemileucini	Dirphia	Dirphia radiata	1	Vismia	1	Vismia sp.	1	Hypericaceae	1	Malpighiales	1	Ligustrum	1	Ligustrum vulgare	1	Oleaceae	1	Lamiales
Saturniidae	Hemileucinae	Hemileucini	Dirphia	Dirphia sachai									2	Quercus|Prunus	2	Quercus sp.|Prunus armeniaca	2	Rosaceae|Fagaceae	2	Rosales|Fagales
Saturniidae	Hemileucinae	Hemileucini	Dirphia	Dirphia tarquinia	3	Vismia|Psidium|Mangifera	3	Vismia cayennensis|Psidium guajava|Mangifera indica	3	Anacardiaceae|Myrtaceae|Hypericaceae	3	Sapindales|Myrtales|Malpighiales	4	Robinia|Salix|Malosma|Schinus	4	Robinia sp.|Salix caprea|Malosma laurina|Schinus terebinthifolius	3	Anacardiaceae|Fabaceae|Salicaceae	3	Sapindales|Fabales|Malpighiales
Saturniidae	Hemileucinae	Hemileucini	Dirphia	Dirphia ursina	4	Glycine|Wisteria|Anacardium|Schinus	4	Glycine|Wisteria|Anacardium occidentale|Schinus gracilipes	2	Anacardiaceae|Fabaceae	2	Sapindales|Fabales	2	Malosma|Schinus	2	Malosma laurina|Schinus terebinthifolius	1	Anacardiaceae	1	Sapindales
Saturniidae	Hemileucinae	Hemileucini	Dirphiopsis	Dirphiopsis delta									1	Prunus	1	Prunus domestica	1	Rosaceae	1	Rosales
Saturniidae	Hemileucinae	Hemileucini	Dirphiopsis	Dirphiopsis epiolina	1	Psidium	1	Psidium guajava	1	Myrtaceae	1	Myrtales
Saturniidae	Hemileucinae	Hemileucini	Dirphiopsis	Dirphiopsis flora	1	Quercus	1	Quercus seemannii	1	Fagaceae	1	Fagales
Saturniidae	Hemileucinae	Hemileucini	Dirphiopsis	Dirphiopsis herbini									1	Malosma	1	Malosma laurina	1	Anacardiaceae	1	Sapindales
Saturniidae	Hemileucinae	Hemileucini	Dirphiopsis	Dirphiopsis multicolor	2	Gossypium|Terminalia	2	Gossypium herbaceum|Terminalia catappa	2	Malvaceae|Combretaceae	2	Malvales|Myrtales	3	Malus|Prunus|Rosa	3	Malus domestica|Prunus domestica|Rosa sp.	1	Rosaceae	1	Rosales
Saturniidae	Hemileucinae	Hemileucini	Dirphiopsis	Dirphiopsis trisignata	8	Ocotea|Roupala|Plenckia|Quercus|Alchornea|Connarus|Eucalyptus|Cedrela	8	Ocotea|Roupala montana|Plenckia populnea|Quercus robur|Alchornea|Connarus suberosus|Eucalyptus saligna|Cedrela	8	Euphorbiaceae|Meliaceae|Connaraceae|Myrtaceae|Lauraceae|Celastraceae|Fagaceae|Proteaceae	8	Malpighiales|Sapindales|Oxalidales|Myrtales|Laurales|Celastrales|Fagales|Proteales
Saturniidae	Hemileucinae	Hemileucini	Dirphiopsis	Dirphiopsis wolfei									1	Quercus	1	Quercus sp.	1	Fagaceae	1	Fagales
Saturniidae	Saturniinae	Micragonini	Dogoia	Dogoia lunata	2	Aframomum|Ficus	2	Aframomum sp.|Ficus sp.	2	Zingiberaceae|Moraceae	2	Zingiberales|Rosales
Saturniidae	Ceratocampinae		Dryocampa	Dryocampa rubicunda	3	Quercus|Morus|Acer	13	Quercus|Quercus coccinea|Quercus ilicifolia|Quercus laevis|Quercus nigra|Quercus velutina|Morus|Acer|Acer negundo|Acer rubrum|Acer saccharinum|Acer saccharum|Acer spicatum	3	Sapindaceae|Moraceae|Fagaceae	3	Sapindales|Rosales|Fagales	4	Fagus|Quercus|Juglans|Acer	7	Fagus grandifolia|Quercus|Quercus robur|Quercus rubra|Juglans cinerea|Acer monspessulanum|Acer pseudoplatanus	3	Sapindaceae|Fagaceae|Juglandaceae	2	Sapindales|Fagales
Saturniidae	Arsenurinae	Arsenurini	Dysdaemonia	Dysdaemonia boreas	1	Ceiba	1	Ceiba pentandra	1	Malvaceae	1	Malvales	2	Chorisia|Brachychiton	3	Chorisia sp.|Chorisia speciosa|Brachychiton populneus	1	Malvaceae	1	Malvales
Saturniidae	Arsenurinae	Arsenurini	Dysdaemonia	Dysdaemonia brasiliensis	1	Bombax	1	Bombax ceiba	1	Malvaceae	1	Malvales
Saturniidae	Arsenurinae	Arsenurini	Dysdaemonia	Dysdaemonia fosteri	1	Ceiba	1	Ceiba insignis	1	Malvaceae	1	Malvales
Saturniidae	Ceratocampinae		Eacles		2	Coffea|Phoradendron	3	Coffea arabica|Coffea liberica|Phoradendron quadrangulare	2	Rubiaceae|Santalaceae	2	Gentianales|Santalales
Saturniidae	Ceratocampinae		Eacles	Eacles ducalis	1	Psidium	1	Psidium guajava	1	Myrtaceae	1	Myrtales	1	Artemisia	1	Artemisia californica	1	Asteraceae	1	Asterales
Saturniidae	Ceratocampinae		Eacles	Eacles imperialis	117	Cornus|Sambucus|Viburnum|Lindera|Alnus|Betula|Carpinus|Ostrya|Castanea|Fagus|Quercus|Juglans|Myrica|Crataegus|Rosa|Ulmus|Gossypium|Tilia|Terminalia|Acer|Rhus|Koelreuteria|Chamaecyparis|Juniperus|Abies|Picea|Pinus|Tsuga|Taxodium|Musa|Inga|Matisia|Theobroma|Psidium|Mangifera|Spondias|Coffea|Cordia|Persea|Tamarindus|Cajanus|Bursera|Calycophyllum|Guettarda|Gmelina|Rehdera|Nectandra|Ocotea|Roupala|Hae…	195	Cornus sp.|Sambucus nigra|Viburnum dentatum|Lindera benzoin|Alnus incana|Alnus serrulata|Betula papyrifera|Betula populifolia|Betula pubescens|Carpinus caroliniana|Ostrya virginiana|Castanea dentata|Castanea pumila|Fagus grandifolia|Quercus alba|Quercus coccinea|Quercus laevis|Quercus macrocarpa|Quercus palustris|Quercus rubra|Juglans cinerea|Myrica cerifera|Crataegus sp.|Rosa sp.|Ulmus alata|Ulm…	44	Pinaceae|Sapindaceae|Betulaceae|Anacardiaceae|Fabaceae|Annonaceae|Moraceae|Apocynaceae|Bixaceae|Burseraceae|Rubiaceae|Juglandaceae|Caryocaraceae|Fagaceae|Meliaceae|Cannabaceae|Ochnaceae|Cupressaceae|Chrysobalanaceae|Melastomataceae|Boraginaceae|Cornaceae|Rosaceae|Ebenaceae|Myrtaceae|Lamiaceae|Malvaceae|Phyllanthaceae|Lauraceae|Altingiaceae|Euphorbiaceae|Musaceae|Myricaceae|Santalaceae|Platanaceae…	23	Pinales|Sapindales|Fagales|Fabales|Magnoliales|Rosales|Gentianales|Malvales|Malpighiales|Cupressales|Myrtales|Boraginales|Cornales|Ericales|Lamiales|Laurales|Saxifragales|Zingiberales|Santalales|Proteales|Dipsacales|Oxalidales|Poales	23	Ligustrum|Betula|Castanea|Fagus|Quercus|Prunus|Ulmus|Lythrum|Acer|Pinus|Juglans|Malus|Tilia|Thuja|Pyracantha|Malosma|Pistacia|Schinus|Carya|Salix|Juniperus|Robinia|Sapindus	40	Ligustrum|Betula|Castanea sativa|Fagus sylvatica|Quercus|Prunus domestica|Prunus laurocerasus|Ulmus|Lythrum salicaria|Acer campestre|Acer saccharinum|Pinus|Juglans regia|Malus domestica|Tilia|Thuja|Quercus robur|Quercus x turneri|Pyracantha|Quercus ilex|Malosma laurina|Pistacia lentiscus|Schinus terebinthifolius|Quercus coccinea|Carya|Salix caprea|Prunus virginiana|Acer|Acer negundo|Juniperus|Pin…	14	Sapindaceae|Betulaceae|Juglandaceae|Fagaceae|Cupressaceae|Oleaceae|Lythraceae|Anacardiaceae|Rosaceae|Pinaceae|Fabaceae|Salicaceae|Malvaceae|Ulmaceae	10	Sapindales|Fagales|Cupressales|Lamiales|Myrtales|Rosales|Pinales|Fabales|Malpighiales|Malvales
Saturniidae	Ceratocampinae		Eacles	Eacles lemairei	1	Roupala	1	Roupala montana	1	Proteaceae	1	Proteales
Saturniidae	Ceratocampinae		Eacles	Eacles masoni									3	Liquidambar|Quercus|Malosma	3	Liquidambar styraciflua|Quercus x turneri|Malosma laurina	3	Altingiaceae|Anacardiaceae|Fagaceae	3	Saxifragales|Sapindales|Fagales
Saturniidae	Ceratocampinae		Eacles	Eacles ormondei	8	Panopsis|Meliosma|Prunus|Hampea|Guarea|Tapirira|Ardisia|Myrsine	12	Panopsis|Meliosma glabrata|Prunus annularis|Hampea appendiculata|Guarea glabra|Tapirira brenesii|Tapirira mexicana|Guarea kegelii|Ardisia compressa|Ardisia revoluta|Myrsine coriacea|Panopsis costaricensis	7	Primulaceae|Meliaceae|Malvaceae|Sabiaceae|Proteaceae|Rosaceae|Anacardiaceae	5	Ericales|Sapindales|Malvales|Proteales|Rosales	2	Quercus|Malosma	2	Quercus sp.|Malosma laurina	2	Anacardiaceae|Fagaceae	2	Sapindales|Fagales
Saturniidae	Ceratocampinae		Eacles	Eacles oslari	2	Quercus|Sapindus	3	Quercus emoryi|Quercus oblongifolia|Sapindus saponaria	2	Fagaceae|Sapindaceae	2	Fagales|Sapindales	8	Liquidambar|Arctostaphylos|Rhus|Schinus|Pinus|Robinia|Quercus|Malosma	13	Liquidambar styraciflua|Arctostaphylos patula|Rhus glabra|Rhus typhina|Schinus molle|Schinus terebinthifolius|Pinus strobus|Robinia neomexicana|Quercus chihuahuaensis|Quercus gambelii|Quercus robur|Quercus rubra|Malosma laurina	6	Ericaceae|Altingiaceae|Anacardiaceae|Pinaceae|Fagaceae|Fabaceae	6	Ericales|Saxifragales|Sapindales|Pinales|Fagales|Fabales
Saturniidae	Ceratocampinae		Eacles	Eacles penelope	5	Zea|Lithraea|Schinus|Tripodanthus|Psidium	6	Zea mays|Lithraea brasiliensis|Schinus polygamus|Schinus terebinthifolius|Tripodanthus acutifolius|Psidium guajava	4	Anacardiaceae|Myrtaceae|Loranthaceae|Poaceae	4	Sapindales|Myrtales|Santalales|Poales	5	Liquidambar|Fagus|Quercus|Salix|Malosma	5	Liquidambar styraciflua|Fagus sylvatica|Quercus ilex|Salix caprea|Malosma laurina	4	Fagaceae|Altingiaceae|Anacardiaceae|Salicaceae	4	Fagales|Saxifragales|Sapindales|Malpighiales
Saturniidae	Saturniinae	Bunaeini	Eochroa	Eochroa trimenii	1	Melianthus	2	Melianthus dregianus|Melianthus sp.	1	Melianthaceae	1	Geraniales	1	Melianthus	1	Melianthus comosus	1	Melianthaceae	1	Geraniales
Saturniidae	Saturniinae	Attacini	Epiphora		1	Celtis	1	Celtis sp.	1	Cannabaceae	1	Rosales
Saturniidae	Saturniinae	Attacini	Epiphora	Epiphora albidus	3	Maesopsis|Citrus|Paullinia	3	Maesopsis eminii|Citrus sp.|Paullinia sp.	3	Rutaceae|Rhamnaceae|Sapindaceae	2	Sapindales|Rosales	1	Zanthoxylum	1	Zanthoxylum clava-herculis	1	Rutaceae	1	Sapindales
Saturniidae	Saturniinae	Attacini	Epiphora	Epiphora antinorii	1	Fraxinus	1	Fraxinus berlandieriana	1	Oleaceae	1	Lamiales
Saturniidae	Saturniinae	Attacini	Epiphora	Epiphora bauhiniae	1	Ziziphus	8	Ziziphus|Ziziphus bacbi|Ziziphus horrida|Ziziphus lotus|Ziziphus mauritiana|Ziziphus senegalensis|Ziziphus spina-christi|Ziziphus mucronata	1	Rhamnaceae	1	Rosales
Saturniidae	Saturniinae	Attacini	Epiphora	Epiphora boolana	1	Discoglypremna	1	Discoglypremna caloneura	1	Euphorbiaceae	1	Malpighiales
Saturniidae	Saturniinae	Attacini	Epiphora	Epiphora mythimnia	4	Fernandoa|Croton|Helinus|Ziziphus	5	Fernandoa magnifica|Croton sylvaticus|Helinus ovatus|Ziziphus mauritiana|Ziziphus mucronata	3	Euphorbiaceae|Bignoniaceae|Rhamnaceae	3	Malpighiales|Lamiales|Rosales	1	Frangula	1	Frangula alnus	1	Rhamnaceae	1	Rosales
Saturniidae	Saturniinae	Attacini	Epiphora	Epiphora ploetzi	4	Erythroxylum|Croton|Maesopsis|Zanthoxylum	4	Erythroxylum mannii|Croton oligandrus|Maesopsis eminii|Zanthoxylum clava-herculis	4	Euphorbiaceae|Erythroxylaceae|Rhamnaceae|Rutaceae	3	Malpighiales|Rosales|Sapindales
Saturniidae	Saturniinae	Attacini	Epiphora	Epiphora rectifascia	4	Croton|Maesopsis|Ziziphus|Zanthoxylum	4	Croton|Maesopsis eminii|Ziziphus mauritiana|Zanthoxylum zanthoxyloides	3	Euphorbiaceae|Rhamnaceae|Rutaceae	3	Malpighiales|Rosales|Sapindales
Saturniidae	Saturniinae	Attacini	Epiphora	Epiphora vacuna	3	Neoboutonia|Maesopsis|Zanthoxylum	3	Neoboutonia melleri|Maesopsis eminii|Zanthoxylum heitzii	3	Rhamnaceae|Euphorbiaceae|Rutaceae	3	Rosales|Malpighiales|Sapindales
Saturniidae	Hemileucinae	Hemileucini	Eubergia	Eubergia caisa	3	Paepalanthus|Chamaecrista|Mimosa	3	Paepalanthus polyanthus|Chamaecrista claussenii|Mimosa lorentzii	2	Fabaceae|Eriocaulaceae	2	Fabales|Poales
Saturniidae	Saturniinae	Urotini	Eudaemonia	Eudaemonia argiphontes	1	Albizia	1	Albizia sp.	1	Fabaceae	1	Fabales
Saturniidae	Saturniinae	Urotini	Eudaemonia	Eudaemonia argus	1	Dialium	1	Dialium guianense	1	Fabaceae	1	Fabales
Saturniidae	Hemileucinae	Hemileucini	Eudyaria	Eudyaria venata	1	Eryngium	4	Eryngium agavifolium|Eryngium elegans|Eryngium paniculatum|Eryngium campestre	1	Apiaceae	1	Apiales	4	Conopodium|Eryngium|Pimpinella|Sanguisorba	5	Conopodium majus|Eryngium agavifolium|Eryngium maritimum|Pimpinella saxifraga|Sanguisorba officinalis	2	Apiaceae|Rosaceae	2	Apiales|Rosales
Saturniidae	Hemileucinae	Hemileucini	Eudyaria	Eudyaria zeta	1	Eryngium	4	Eryngium elegans|Eryngium paniculatum|Eryngium|Eryngium ebracteatum	1	Apiaceae	1	Apiales	1	Eryngium	1	Eryngium paniculatum	1	Apiaceae	1	Apiales
Saturniidae	Saturniinae	Attacini	Eupackardia	Eupackardia calleta	9	Tecoma|Fouquieria|Forestiera|Fraxinus|Ligustrum|Leucophyllum|Sapium|Salix|Schinus	13	Tecoma stans|Fouquieria columnaris|Fouquieria splendens|Forestiera angustifolia|Fraxinus|Fraxinus gooddingii|Fraxinus greggii|Ligustrum|Leucophyllum frutescens|Leucophyllum langmaniae|Sapium biloculare|Salix|Schinus molle	7	Oleaceae|Fouquieriaceae|Scrophulariaceae|Salicaceae|Euphorbiaceae|Anacardiaceae|Bignoniaceae	4	Lamiales|Ericales|Malpighiales|Sapindales	10	Tecoma|Fraxinus|Ligustrum|Syringa|Acacia|Betula|Salix|Prunus|Schinus|Malosma	18	Tecoma stans|Fraxinus|Fraxinus greggii|Fraxinus velutina|Ligustrum|Ligustrum ovalifolium|Syringa vulgaris|Acacia|Betula|Salix|Prunus|Prunus domestica|Prunus pensylvanica|Prunus serotina|Schinus molle|Schinus terebinthifolius|Salix babylonica|Malosma laurina	7	Fabaceae|Betulaceae|Oleaceae|Anacardiaceae|Rosaceae|Salicaceae|Bignoniaceae	6	Fabales|Fagales|Lamiales|Sapindales|Rosales|Malpighiales
Saturniidae	Hemileucinae	Hemileucini	Gamelia		1	Acalypha	1	Acalypha diversifolia	1	Euphorbiaceae	1	Malpighiales
Saturniidae	Hemileucinae	Hemileucini	Gamelia	Gamelia abasia	1	Psidium	1	Psidium guajava	1	Myrtaceae	1	Myrtales
Saturniidae	Hemileucinae	Hemileucini	Gamelia	Gamelia musta	83	Clethra|Pouteria|Vernonanthura|Posoqueria|Rondeletia|Spermacoce|Cordia|Calathea|Meliosma|Senna|Cojoba|Inga|Pithecellobium|Zygia|Erythrina|Lonchocarpus|Ormosia|Pterocarpus|Alfaroa|Acalypha|Acidoton|Alchornea|Pausandra|Lacistema|Cnestidium|Connarus|Sloanea|Pseudolmedia|Sorocea|Trophis|Trema|Urera|Hampea|Malvaviscus|Combretum|Guarea|Cupania|Serjania|Heisteria|Guatteria|Forsteronia|Licania|Dioclea|Ma…	119	Clethra sp.|Clethra mexicana|Pouteria exfoliata|Pouteria reticulata|Vernonanthura patens|Posoqueria latifolia|Rondeletia buddleioides|Spermacoce|Cordia panamensis|Calathea crotalifera|Meliosma glabrata|Senna papillosa|Cojoba valerioi|Inga herrerae|Inga longispica|Inga mortoniana|Inga punctata|Inga semialata|Pithecellobium furcatum|Zygia longifolia|Erythrina lanceolata|Lonchocarpus heptaphyllus|Lo…	36	Euphorbiaceae|Juglandaceae|Rubiaceae|Bignoniaceae|Arecaceae|Malpighiaceae|Sapindaceae|Moraceae|Marantaceae|Fabaceae|Cannabaceae|Ochnaceae|Sapotaceae|Verbenaceae|Clethraceae|Connaraceae|Polygonaceae|Combretaceae|Boraginaceae|Erythroxylaceae|Apocynaceae|Meliaceae|Annonaceae|Malvaceae|Erythropalaceae|Phyllanthaceae|Lacistemataceae|Asteraceae|Chrysobalanaceae|Sabiaceae|Myrtaceae|Urticaceae|Cyperaceae…	20	Malpighiales|Fagales|Gentianales|Lamiales|Arecales|Sapindales|Rosales|Zingiberales|Fabales|Ericales|Oxalidales|Caryophyllales|Myrtales|Boraginales|Magnoliales|Malvales|Santalales|Asterales|Proteales|Poales
Saturniidae	Ceratocampinae		Giacomellia	Giacomellia bilineata	2	Acacia|Prosopis	3	Acacia sp.|Prosopis sp.|Prosopis nigra	1	Fabaceae	1	Fabales
Saturniidae	Saturniinae	Bunaeini	Gonimbrasia		3	Annona|Hymenocardia|Gossypium	3	Annona senegalensis|Hymenocardia acida|Gossypium sp.	3	Annonaceae|Malvaceae|Phyllanthaceae	3	Magnoliales|Malvales|Malpighiales
Saturniidae	Saturniinae	Bunaeini	Gonimbrasia	Gonimbrasia alopia	7	Albizia|Piptadeniastrum|Chaetocarpus|Manotes|Celtis|Trema|Mangifera	7	Albizia ferruginea|Piptadeniastrum africanum|Chaetocarpus africanus|Manotes longiflora|Celtis durandii|Trema orientalis|Mangifera indica	5	Fabaceae|Cannabaceae|Euphorbiaceae|Anacardiaceae|Connaraceae	5	Fabales|Rosales|Malpighiales|Sapindales|Oxalidales	1	Salix	1	Salix caprea	1	Salicaceae	1	Malpighiales
Saturniidae	Saturniinae	Bunaeini	Gonimbrasia	Gonimbrasia anna	2	Hyphaene|Borassus	3	Hyphaene coriacea|Hyphaene thebaica|Borassus aethiopum	1	Arecaceae	1	Arecales
Saturniidae	Saturniinae	Bunaeini	Gonimbrasia	Gonimbrasia anthina	6	Strychnos|Aframomum|Antidesma|Manotes|Musanga|Mangifera	6	Strychnos pungens|Aframomum albovioaceum|Antidesma venosum|Manotes longiflora|Musanga cecropoides|Mangifera sp.	6	Zingiberaceae|Phyllanthaceae|Anacardiaceae|Connaraceae|Urticaceae|Loganiaceae	6	Zingiberales|Malpighiales|Sapindales|Oxalidales|Rosales|Gentianales
Saturniidae	Saturniinae	Bunaeini	Gonimbrasia	Gonimbrasia bamendana	1	Maesa	1	Maesa lanceolata	1	Primulaceae	1	Ericales
Saturniidae	Saturniinae	Bunaeini	Gonimbrasia	Gonimbrasia belina	29	Diospyros|Carissa|Diplorhynchus|Protea|Brachystegia|Burkea|Colophospermum|Copaifera|Erythrophleum|Isoberlinia|Julbernardia|Schotia|Medicago|Pseudolachnostylis|Uapaca|Ficus|Trema|Balanites|Monotes|Terminalia|Syzygium|Ozoroa|Protorhus|Rhus|Sclerocarya|Melia|Pinus|Platanus|Mangifera	35	Diospyros|Carissa macrocarpa|Diplorhynchus condylocarpon|Protea angolensis|Brachystegia glaberrima|Burkea africana|Colophospermum mopane|Copaifera|Erythrophleum africanum|Isoberlinia angolensis|Julbernardia paniculata|Schotia brachypetala|Medicago|Pseudolachnostylis maprouneifolia|Uapaca kirkiana|Uapaca sansibarica|Ficus|Trema angustifolia|Balanites aegyptiaca|Monotes africanus|Terminalia|Termina…	15	Zygophyllaceae|Fabaceae|Apocynaceae|Ebenaceae|Moraceae|Anacardiaceae|Meliaceae|Dipterocarpaceae|Pinaceae|Platanaceae|Proteaceae|Phyllanthaceae|Myrtaceae|Combretaceae|Cannabaceae	11	Zygophyllales|Fabales|Gentianales|Ericales|Rosales|Sapindales|Malvales|Pinales|Proteales|Malpighiales|Myrtales	6	Diospyros|Quercus|Salix|Malus|Pyrus|Pinus	8	Diospyros|Diospyros mespiliformis|Diospyros whyteana|Quercus|Salix|Malus|Pyrus|Pinus roxburghii	5	Ebenaceae|Rosaceae|Pinaceae|Fagaceae|Salicaceae	5	Ericales|Rosales|Pinales|Fagales|Malpighiales
Saturniidae	Saturniinae	Bunaeini	Gonimbrasia	Gonimbrasia bubo	13	Diospyros|Euclea|Rapanea|Burchellia|Canthium|Protea|Myrica|Rhamnus|Malus|Gerrardina|Eucalyptus|Rhus|Pinus	19	Diospyros mespiliformis|Diospyros whyteana|Euclea|Rapanea melanophloeos|Burchellia bubalina|Canthium inerme|Protea caffraz|Myrica|Myrica serrata|Rhamnus prinoides|Malus pumila|Gerrardina foliosa|Eucalyptus grandis|Eucalyptus macarthurii|Rhus lucida|Rhus tumulicola|Pinus caribaea|Pinus patula|Pinus roxburghii	11	Rubiaceae|Ebenaceae|Myrtaceae|Gerrardinaceae|Rosaceae|Myricaceae|Pinaceae|Proteaceae|Primulaceae|Rhamnaceae|Anacardiaceae	9	Gentianales|Ericales|Myrtales|Huerteales|Rosales|Fagales|Pinales|Proteales|Sapindales	4	Leucospermum|Psidium|Rhus|Pinus	4	Leucospermum cuneiforme|Psidium guajava|Rhus tumulicola|Pinus patula	4	Proteaceae|Pinaceae|Myrtaceae|Anacardiaceae	4	Proteales|Pinales|Myrtales|Sapindales
Saturniidae	Saturniinae	Bunaeini	Gonimbrasia	Gonimbrasia capdevillei	5	Cajanus|Eriosema|Pseudarthria|Croton|Combretum	5	Cajanus cajan|Eriosema|Pseudarthria|Croton macrostachyus|Combretum	3	Fabaceae|Combretaceae|Euphorbiaceae	3	Fabales|Myrtales|Malpighiales
Saturniidae	Saturniinae	Bunaeini	Gonimbrasia	Gonimbrasia carnegiei	2	Protea|Julbernardia	5	Protea|Protea angolensis|Protea gaguedi|Julbernardia globiflora|Julbernardia paniculata	2	Fabaceae|Proteaceae	2	Fabales|Proteales
Saturniidae	Saturniinae	Bunaeini	Gonimbrasia	Gonimbrasia cleoris									3	Ligustrum|Crataegus|Prunus	3	Ligustrum sp.|Crataegus sp.|Prunus sp.	2	Rosaceae|Oleaceae	2	Rosales|Lamiales
Saturniidae	Saturniinae	Bunaeini	Gonimbrasia	Gonimbrasia conradsi	3	Eucalyptus|Mangifera|Rhus	3	Eucalyptus ficifolia|Mangifera indica|Rhus sp.	2	Myrtaceae|Anacardiaceae	2	Myrtales|Sapindales	1	Mangifera	1	Mangifera indica	1	Anacardiaceae	1	Sapindales
Saturniidae	Saturniinae	Bunaeini	Gonimbrasia	Gonimbrasia cytherea	30	Diospyros|Euclea|Euryops|Watsonia|Leucadendron|Leucospermum|Protea|Acacia|Myrica|Eriobotrya|Eucalyptus|Psidium|Rhus|Pinus|Rapanea|Liriodendron|Platanus|Brabejum|Quercus|Cydonia|Malus|Sclerocarya|Cupressus|Ribes|Erica|Psychotria|Halleria|Faurea|Pterocelastrus|Syzygium	75	Diospyros austro-africana|Diospyros glabra|Euclea crispa|Euclea polyandra|Euclea racemosa|Euclea schimperi|Euclea tomentosa|Euryops linifolius|Watsonia|Leucadendron parviflorum|Leucadendron salicifolium|Leucadendron salignum|Leucospermum reflexum|Protea cynaroides|Protea repens|Acacia cyclops|Acacia longifolia|Acacia mearnsii|Acacia saligna|Myrica integra|Myrica quercifolia|Eriobotrya japonica|Eu…	20	Fabaceae|Proteaceae|Cupressaceae|Rosaceae|Ebenaceae|Ericaceae|Myrtaceae|Asteraceae|Stilbaceae|Magnoliaceae|Myricaceae|Pinaceae|Platanaceae|Rubiaceae|Celastraceae|Fagaceae|Primulaceae|Anacardiaceae|Grossulariaceae|Iridaceae	16	Fabales|Proteales|Cupressales|Rosales|Ericales|Myrtales|Asterales|Lamiales|Magnoliales|Fagales|Pinales|Gentianales|Celastrales|Sapindales|Saxifragales|Asparagales	10	Leucospermum|Quercus|Crataegus|Malus|Psidium|Pinus|Salix|Rosa|Rhus|Larix	12	Leucospermum reflexum|Quercus|Crataegus|Malus|Psidium guajava|Pinus radiata|Quercus ilex|Salix|Rosa|Rhus glabra|Larix|Pinus sylvestris	7	Rosaceae|Pinaceae|Proteaceae|Myrtaceae|Fagaceae|Anacardiaceae|Salicaceae	7	Rosales|Pinales|Proteales|Myrtales|Fagales|Sapindales|Malpighiales
Saturniidae	Saturniinae	Bunaeini	Gonimbrasia	Gonimbrasia eblis	8	Cassia|Acacia|Chaetocarpus|Ochna|Manotes|Mangifera|Aucoumea|Citrus	9	Cassia|Acacia auriculiformis|Chaetocarpus africanus|Ochna afzelii|Manotes longiflora|Mangifera|Mangifera indica|Aucoumea klaineana|Citrus aurantium	7	Fabaceae|Burseraceae|Euphorbiaceae|Rutaceae|Anacardiaceae|Connaraceae|Ochnaceae	4	Fabales|Sapindales|Malpighiales|Oxalidales
Saturniidae	Saturniinae	Bunaeini	Gonimbrasia	Gonimbrasia emini	6	Protea|Bridelia|Harungana|Psidium|Rhus|Erythrina	6	Protea elliottii|Bridelia|Harungana|Psidium guajava|Rhus|Erythrina abyssinica	6	Phyllanthaceae|Fabaceae|Hypericaceae|Proteaceae|Myrtaceae|Anacardiaceae	5	Malpighiales|Fabales|Proteales|Myrtales|Sapindales
Saturniidae	Saturniinae	Bunaeini	Gonimbrasia	Gonimbrasia gueinzii	4	Maesa|Myrica|Eucalyptus|Pseudarthria	5	Maesa alnifolia|Maesa lanceolata|Myrica|Eucalyptus cladocalyx|Pseudarthria	4	Myrtaceae|Primulaceae|Myricaceae|Fabaceae	4	Myrtales|Ericales|Fagales|Fabales	2	Malus|Prunus	2	Malus domestica|Prunus domestica	1	Rosaceae	1	Rosales
Saturniidae	Saturniinae	Bunaeini	Gonimbrasia	Gonimbrasia hecate	8	Vitellaria|Bauhinia|Piptadeniastrum|Maesopsis|Annona|Julbernardia|Combretum|Terminalia	11	Vitellaria paradoxa|Bauhinia thonningii|Piptadeniastrum africanum|Maesopsis eminii|Annona senegalensis|Bauhinia reticulata|Julbernardia globiflora|Julbernardia paniculata|Combretum psidioides|Terminalia|Terminalia schweinfurthi	5	Annonaceae|Fabaceae|Combretaceae|Rhamnaceae|Sapotaceae	5	Magnoliales|Fabales|Myrtales|Rosales|Ericales	1	Malus	1	Malus sp.	1	Rosaceae	1	Rosales
Saturniidae	Saturniinae	Bunaeini	Gonimbrasia	Gonimbrasia hoehnelii	2	Acacia|Schinus	3	Acacia sp.|Acacia mearnsii|Schinus molle	2	Fabaceae|Anacardiaceae	2	Fabales|Sapindales	2	Calluna|Malus	2	Calluna vulgaris|Malus Hillieri	2	Ericaceae|Rosaceae	2	Ericales|Rosales
Saturniidae	Saturniinae	Bunaeini	Gonimbrasia	Gonimbrasia jamesoni	2	Celtis|Mangifera	2	Celtis durandii|Mangifera indica	2	Cannabaceae|Anacardiaceae	2	Rosales|Sapindales	1	Mangifera	1	Mangifera indica	1	Anacardiaceae	1	Sapindales
Saturniidae	Saturniinae	Bunaeini	Gonimbrasia	Gonimbrasia krucki	3	Acokanthera|Eucalyptus|Schinus	3	Acokanthera sp.|Eucalyptus citriodora|Schinus molle	3	Apocynaceae|Myrtaceae|Anacardiaceae	3	Gentianales|Myrtales|Sapindales	5	Betula|Fagus|Prunus|Malosma|Rhus	5	Betula|Fagus sylvatica|Prunus armeniaca|Malosma laurina|Rhus trilobata	4	Betulaceae|Fagaceae|Anacardiaceae|Rosaceae	3	Fagales|Sapindales|Rosales
Saturniidae	Saturniinae	Bunaeini	Gonimbrasia	Gonimbrasia macrops	1	Pinus	1	Pinus sp.	1	Pinaceae	1	Pinales	1	Brachystegia	1	Brachystegia venosa	1	Fabaceae	1	Fabales
Saturniidae	Saturniinae	Bunaeini	Gonimbrasia	Gonimbrasia macrothyris	2	Brachystegia|Julbernardia	3	Brachystegia spiciformis|Julbernardia globiflora|Julbernardia paniculata	1	Fabaceae	1	Fabales	2	Malus|Prunus	2	Malus domestica|Prunus domestica	1	Rosaceae	1	Rosales
Saturniidae	Saturniinae	Bunaeini	Gonimbrasia	Gonimbrasia melanops	3	Albizia|Pentaclethra|Macaranga	3	Albizia ferruginea|Pentaclethra macrophylla|Macaranga hurifolia	2	Fabaceae|Euphorbiaceae	2	Fabales|Malpighiales	1	Acacia	1	Acacia auriculiformis	1	Fabaceae	1	Fabales
Saturniidae	Saturniinae	Bunaeini	Gonimbrasia	Gonimbrasia occidentalis	1	Terminalia	1	Terminalia schweinfurthi	1	Combretaceae	1	Myrtales
Saturniidae	Saturniinae	Bunaeini	Gonimbrasia	Gonimbrasia osiris									1	Quercus	2	Quercus robur|Quercus x turneri	1	Fagaceae	1	Fagales
Saturniidae	Saturniinae	Bunaeini	Gonimbrasia	Gonimbrasia petiveri	29	Vitex|Acacia|Ricinodendron|Antidesma|Milicia|Psidium|Maesa|Diplorhynchus|Canna|Bauhinia|Mimosa|Cajanus|Erythrina|Aleurites|Jatropha|Manihot|Ricinus|Vernicia|Ficus|Morus|Trema|Theobroma|Terminalia|Eucalyptus|Eugenia|Anacardium|Spondias|Aucoumea|Khaya	34	Vitex madiensis|Acacia auriculiformis|Ricinodendron heudelotii|Antidesma vogelianum|Milicia excelsa|Psidium guajava|Maesa lanceolata|Diplorhynchus mossambicensis|Canna sp.|Bauhinia petersiana|Mimosa sp.|Cajanus cajan|Erythrina sp.|Aleurites moluccana|Jatropha curcas|Manihot esculenta|Ricinus communis|Vernicia fordii|Vernicia montana|Ficus sycomorus|Milicia regia|Morus alba|Trema orientalis|Theobr…	15	Fabaceae|Euphorbiaceae|Anacardiaceae|Phyllanthaceae|Burseraceae|Cannaceae|Apocynaceae|Myrtaceae|Moraceae|Meliaceae|Primulaceae|Combretaceae|Malvaceae|Cannabaceae|Lamiaceae	10	Fabales|Malpighiales|Sapindales|Zingiberales|Gentianales|Myrtales|Rosales|Ericales|Malvales|Lamiales	2	Sapium|Erythroxylum	2	Sapium ellipticum|Erythroxylum havanense	2	Erythroxylaceae|Euphorbiaceae	1	Malpighiales
Saturniidae	Saturniinae	Bunaeini	Gonimbrasia	Gonimbrasia rectilineata	5	Diplorhynchus|Mimosa|Lupinus|Uapaca|Syzygium	5	Diplorhynchus mossambicensis|Mimosa|Lupinus|Uapaca kirkiana|Syzygium owariense	4	Apocynaceae|Fabaceae|Myrtaceae|Phyllanthaceae	4	Gentianales|Fabales|Myrtales|Malpighiales	1	Salix	1	Salix sp.	1	Salicaceae	1	Malpighiales
Saturniidae	Saturniinae	Bunaeini	Gonimbrasia	Gonimbrasia rhodina	1	Uapaca	2	Uapaca kirkiana|Uapaca nitida	1	Phyllanthaceae	1	Malpighiales
Saturniidae	Saturniinae	Bunaeini	Gonimbrasia	Gonimbrasia staudingeri	2	Paraserianthes|Mangifera	2	Paraserianthes falcataria|Mangifera indica	2	Anacardiaceae|Fabaceae	2	Sapindales|Fabales
Saturniidae	Saturniinae	Bunaeini	Gonimbrasia	Gonimbrasia tyrrhea	11	Euclea|Acacia|Albizia|Quercus|Populus|Salix|Eucalyptus|Ozoroa|Schinus|Pinus|Syringa	19	Euclea pseudebenus|Acacia|Acacia horrida|Acacia karroo|Acacia mearnsii|Albizia|Quercus|Populus|Populus x canescens|Salix babylonica|Eucalyptus globulus|Eucalyptus viminalis|Ozoroa concolor|Schinus molle|Pinus patula|Pinus radiata|Pinus sylvestris|Syringa|Acacia caffra	8	Fabaceae|Myrtaceae|Ebenaceae|Anacardiaceae|Pinaceae|Salicaceae|Fagaceae|Oleaceae	8	Fabales|Myrtales|Ericales|Sapindales|Pinales|Malpighiales|Fagales|Lamiales	6	Salix|Crataegus|Malus|Prunus|Malosma|Quercus	8	Salix caprea|Salix cinerea|Crataegus|Malus|Prunus laurocerasus|Prunus virginiana|Malosma laurina|Quercus robur	4	Rosaceae|Anacardiaceae|Fagaceae|Salicaceae	4	Rosales|Sapindales|Fagales|Malpighiales
Saturniidae	Saturniinae	Bunaeini	Gonimbrasia	Gonimbrasia venus									2	Malus|Prunus	2	Malus sp.|Prunus domestica	1	Rosaceae	1	Rosales
Saturniidae	Saturniinae	Bunaeini	Gonimbrasia	Gonimbrasia wahlbergii	19	Maesobotrya|Acacia|Maerua|Schinus|Quercus|Ricinus|Prunus|Psidium|Mangifera|Liquidambar|Halleria|Platanus|Macaranga|Bridelia|Ficus|Trema|Tibouchina|Rhus|Ekebergia	21	Maesobotrya vermeulenii|Acacia|Maerua|Schinus molle|Quercus|Ricinus communis|Prunus persica|Psidium guajava|Mangifera indica|Liquidambar styraciflua|Halleria lucida|Platanus|Acacia mearnsii|Macaranga capensis|Bridelia micrantha|Ficus lutea|Trema orientalis|Tibouchina semidecandra|Rhus chirindensis|Schinus terebinthifolius|Ekebergia capensis	15	Fabaceae|Phyllanthaceae|Meliaceae|Moraceae|Stilbaceae|Altingiaceae|Euphorbiaceae|Capparaceae|Anacardiaceae|Platanaceae|Rosaceae|Myrtaceae|Fagaceae|Melastomataceae|Cannabaceae	10	Fabales|Malpighiales|Sapindales|Rosales|Lamiales|Saxifragales|Brassicales|Proteales|Myrtales|Fagales
Saturniidae	Saturniinae	Bunaeini	Gonimbrasia	Gonimbrasia xanthomma	1	Rubus	1	Rubus sp.	1	Rosaceae	1	Rosales	1	Rosa	1	Rosa sp.	1	Rosaceae	1	Rosales
Saturniidae	Saturniinae	Bunaeini	Gonimbrasia	Gonimbrasia zambesina	11	Diospyros|Barringtonia|Nerium|Petrea|Caesalpinia|Delonix|Mangifera|Ozoroa|Schinus|Deinbollia|Prunus	12	Diospyros mespiliformis|Barringtonia|Nerium oleander|Petrea volubilis|Caesalpinia|Delonix|Delonix regia|Mangifera indica|Ozoroa mucronata|Schinus molle|Deinbollia|Prunus domestica	8	Lecythidaceae|Fabaceae|Sapindaceae|Ebenaceae|Anacardiaceae|Apocynaceae|Verbenaceae|Rosaceae	6	Ericales|Fabales|Sapindales|Gentianales|Lamiales|Rosales	8	Nerium|Fagus|Salix|Rhus|Quercus|Juglans|Mangifera|Ozoroa	9	Nerium oleander|Fagus sylvatica|Salix caprea|Salix cinerea|Rhus|Quercus robur|Juglans regia|Mangifera indica|Ozoroa mucronata	5	Fagaceae|Juglandaceae|Anacardiaceae|Apocynaceae|Salicaceae	4	Fagales|Sapindales|Gentianales|Malpighiales
Saturniidae	Saturniinae	Micragonini	Goodia	Goodia nubilata	1	Aframomum	1	Aframomum sp.	1	Zingiberaceae	1	Zingiberales
Saturniidae	Saturniinae	Micragonini	Goodia	Goodia oxytela	1	Aframomum	1	Aframomum melegueta	1	Zingiberaceae	1	Zingiberales
Saturniidae	Saturniinae	Bunaeini	Gynanisa	Gynanisa ata	4	Brachystegia|Julbernardia|Acacia|Khaya	4	Brachystegia venosa|Julbernardia paniculata|Acacia|Khaya nyasica	2	Fabaceae|Meliaceae	2	Fabales|Sapindales
Saturniidae	Saturniinae	Bunaeini	Gynanisa	Gynanisa jama	1	Acacia	1	Acacia mearnsii	1	Fabaceae	1	Fabales
Saturniidae	Saturniinae	Bunaeini	Gynanisa	Gynanisa maja	14	Diplorhynchus|Protea|Brachystegia|Cassia|Colophospermum|Isoberlinia|Julbernardia|Schotia|Acacia|Elephantorrhiza|Pseudolachnostylis|Uapaca|Prunus|Syzygium	19	Diplorhynchus condylocarpon|Protea angolensis|Brachystegia glaberrima|Cassia|Colophospermum mopane|Isoberlinia angolensis|Julbernardia paniculata|Schotia brachypetala|Acacia|Acacia erioloba|Acacia karroo|Acacia mearnsii|Elephantorrhiza elephantina|Pseudolachnostylis maprouneifolia|Uapaca kirkiana|Uapaca sansibarica|Prunus persica|Syzygium guineense|Acacia horrida	6	Fabaceae|Apocynaceae|Proteaceae|Rosaceae|Phyllanthaceae|Myrtaceae	6	Fabales|Gentianales|Proteales|Rosales|Malpighiales|Myrtales	4	Acacia|Laburnum|Robinia|Quercus	7	Acacia baileyana|Laburnum anagyroides|Robinia pseudoacacia|Quercus|Quercus gambelii|Quercus robur|Quercus x turneri	2	Fabaceae|Fagaceae	2	Fabales|Fagales
Saturniidae	Saturniinae	Bunaeini	Gynanisa	Gynanisa westwoodi	1	Acacia	1	Acacia sp.	1	Fabaceae	1	Fabales
Saturniidae	Hemileucinae		Heliconisa	Heliconisa pagenstecheri	2	Eryngium|Andropogon	2	Eryngium elegans|Andropogon campestris	2	Poaceae|Apiaceae	2	Poales|Apiales
Saturniidae	Hemileucinae	Hemileucini	Hemileuca		1	Purshia	1	Purshia tridentata	1	Rosaceae	1	Rosales
Saturniidae	Hemileucinae	Hemileucini	Hemileuca	Hemileuca annulata	8	Symphoricarpos|Salix|Ceanothus|Amelanchier|Cercocarpus|Prunus|Purshia|Rosa	8	Symphoricarpos oreophilus|Salix|Ceanothus velutinus|Amelanchier|Cercocarpus betuloides|Prunus emarginata|Purshia tridentata|Rosa	4	Rosaceae|Rhamnaceae|Salicaceae|Caprifoliaceae	3	Rosales|Malpighiales|Dipsacales
Saturniidae	Hemileucinae	Hemileucini	Hemileuca	Hemileuca burnsi	5	Tetradymia|Eriogonum|Acacia|Psorothamnus|Prunus	9	Tetradymia|Tetradymia axillaris|Tetradymia glabrata|Tetradymia spinosa|Eriogonum fasciculatum|Acacia greggii|Psorothamnus arborescens|Psorothamnus fremontii|Prunus fasciculata	4	Fabaceae|Polygonaceae|Rosaceae|Asteraceae	4	Fabales|Caryophyllales|Rosales|Asterales	3	Eriogonum|Prunus|Gleditsia	4	Eriogonum fasciculatum|Prunus sp.|Prunus virginiana|Gleditsia triacanthos	3	Polygonaceae|Fabaceae|Rosaceae	3	Caryophyllales|Fabales|Rosales
Saturniidae	Hemileucinae	Hemileucini	Hemileuca	Hemileuca chinatiensis	7	Forestiera|Mahonia|Mimosa|Condalia|Krameria|Rhus|Ephedra	10	Forestiera angustifolia|Mahonia trifoliolata|Mimosa aculeaticarpa|Mimosa borealis|Mimosa lindheimeri|Condalia ericoides|Krameria erecta|Rhus aromatica|Rhus microphylla|Ephedra nevadensis	7	Rhamnaceae|Ephedraceae|Oleaceae|Krameriaceae|Berberidaceae|Fabaceae|Anacardiaceae	7	Rosales|Ephedrales|Lamiales|Zygophyllales|Ranunculales|Fabales|Sapindales	3	Condalia|Cercocarpus|Fremontodendron	3	Condalia hookeri|Cercocarpus sp.|Fremontodendron californicum	3	Rosaceae|Rhamnaceae|Malvaceae	2	Rosales|Malvales
Saturniidae	Hemileucinae	Hemileucini	Hemileuca	Hemileuca eglanterina	22	Arctostaphylos|Symphoricarpos|Salix|Frangula|Rhamnus|Prunus|Rubus|Spiraea|Vitis|Ribes|Centaurea|Betula|Populus|Ceanothus|Amelanchier|Cercocarpus|Holodiscus|Purshia|Pyracantha|Rosa|Acer|Quercus	40	Arctostaphylos glauca|Arctostaphylos uva-ursi|Symphoricarpos albus|Symphoricarpos mollis|Salix exigua|Frangula californica|Rhamnus alnifolia|Prunus domestica|Prunus serotina|Rubus|Rubus allegheniensis|Spiraea douglasii|Vitis californica|Vitis vulpina|Symphoricarpos|Ribes|Centaurea cyanus|Betula|Populus|Populus tremuloides|Salix|Ceanothus spinosus|Ceanothus thyrsiflorus|Amelanchier|Amelanchier aln…	11	Sapindaceae|Rosaceae|Ericaceae|Betulaceae|Rhamnaceae|Asteraceae|Salicaceae|Fagaceae|Grossulariaceae|Caprifoliaceae|Vitaceae	9	Sapindales|Rosales|Ericales|Fagales|Asterales|Malpighiales|Saxifragales|Dipsacales|Vitales	9	Stellaria|Adenostoma|Potentilla|Prunus|Symphoricarpos|Cercocarpus|Holodiscus|Pyrus|Salix	13	Stellaria|Adenostoma fasciculatum|Potentilla|Prunus avium|Symphoricarpos|Cercocarpus betuloides|Holodiscus discolor|Pyrus|Cercocarpus|Prunus cerasus|Salix discolor|Cercocarpus montanus|Prunus serotina	4	Rosaceae|Salicaceae|Caryophyllaceae|Caprifoliaceae	4	Rosales|Malpighiales|Caryophyllales|Dipsacales
Saturniidae	Hemileucinae	Hemileucini	Hemileuca	Hemileuca electra	6	Eriogonum|Fouquieria|Pachycormus|Simmondsia|Tamarix|Bursera	8	Eriogonum fasciculatum|Eriogonum|Fouquieria splendens|Pachycormus discolor|Fouquieria columnaris|Simmondsia chinensis|Tamarix|Bursera microphylla	6	Burseraceae|Polygonaceae|Fouquieriaceae|Anacardiaceae|Simmondsiaceae|Tamaricaceae	3	Sapindales|Caryophyllales|Ericales	1	Eriogonum	3	Eriogonum fasciculatum|Eriogonum giganteum|Eriogonum latifolium	1	Polygonaceae	1	Caryophyllales
Saturniidae	Hemileucinae	Hemileucini	Hemileuca	Hemileuca griffini	2	Coleogyne|Ephedra	2	Coleogyne ramosissima|Ephedra sp.	2	Rosaceae|Ephedraceae	2	Rosales|Ephedrales	3	Amelanchier|Cercocarpus|Prunus	3	Amelanchier sp.|Cercocarpus betuloides|Prunus sp.	1	Rosaceae	1	Rosales
Saturniidae	Hemileucinae	Hemileucini	Hemileuca	Hemileuca grotei	1	Quercus	12	Quercus|Quercus emoryi|Quercus gambelii|Quercus oblongifolia|Quercus turbinella|Quercus fusiformis|Quercus havardii|Quercus ilicifolia|Quercus marilandica|Quercus stellata|Quercus texana|Quercus virginiana	1	Fagaceae	1	Fagales	1	Quercus	3	Quercus lobata|Quercus palustris|Quercus robur	1	Fagaceae	1	Fagales
Saturniidae	Hemileucinae	Hemileucini	Hemileuca	Hemileuca hera	1	Artemisia	4	Artemisia|Artemisia cana|Artemisia tridentata|Artemisia tripartita	1	Asteraceae	1	Asterales	1	Artemisia	1	Artemisia tripartita	1	Asteraceae	1	Asterales
Saturniidae	Hemileucinae	Hemileucini	Hemileuca	Hemileuca hualapai	2	Bouteloua|Leptochloa	2	Bouteloua curtipendula|Leptochloa dubia	1	Poaceae	1	Poales	1	Cynodon	1	Cynodon sp.	1	Poaceae	1	Poales
Saturniidae	Hemileucinae	Hemileucini	Hemileuca	Hemileuca juno	1	Prosopis	4	Prosopis|Prosopis juliflora|Prosopis pubescens|Prosopis glandulosa	1	Fabaceae	1	Fabales	2	Gleditsia|Prosopis	2	Gleditsia triacanthos|Prosopis sp.	1	Fabaceae	1	Fabales
Saturniidae	Hemileucinae	Hemileucini	Hemileuca	Hemileuca lex									4	Robinia|Fagus|Eriogonum|Quercus	4	Robinia pseudoacacia|Fagus sylvatica|Eriogonum wrightii|Quercus arizonica	3	Polygonaceae|Fagaceae|Fabaceae	3	Caryophyllales|Fagales|Fabales
Saturniidae	Hemileucinae	Hemileucini	Hemileuca	Hemileuca lucina	7	Menyanthes|Betula|Quercus|Salix|Prunus|Spiraea|Vaccinium	10	Menyanthes trifoliata|Betula populifolia|Quercus|Salix|Prunus serotina|Spiraea|Spiraea alba|Spiraea salicifolia|Spiraea tomentosa|Vaccinium macrocarpon	6	Betulaceae|Menyanthaceae|Rosaceae|Fagaceae|Salicaceae|Ericaceae	5	Fagales|Asterales|Rosales|Malpighiales|Ericales	4	Betula|Quercus|Salix|Spiraea	5	Betula papyrifera|Quercus|Salix|Spiraea|Spiraea tomentosa	4	Betulaceae|Fagaceae|Salicaceae|Rosaceae	3	Fagales|Malpighiales|Rosales
Saturniidae	Hemileucinae	Hemileucini	Hemileuca	Hemileuca magnifica	1	Artemisia	2	Artemisia filifolia|Artemisia tridentata	1	Asteraceae	1	Asterales	1	Eriogonum	1	Eriogonum effusum	1	Polygonaceae	1	Caryophyllales
Saturniidae	Hemileucinae	Hemileucini	Hemileuca	Hemileuca maia	10	Corylus|Quercus|Populus|Salix|Ceanothus|Prunus|Rosa|Rubus|Spiraea|Vaccinium	24	Corylus|Quercus|Quercus bicolor|Quercus falcata|Quercus ilicifolia|Quercus laevis|Quercus muehlenbergii|Quercus nigra|Quercus prinoides|Quercus rubra|Quercus stellata|Quercus velutina|Quercus virginiana|Populus fremontii|Populus tremuloides|Salix|Salix humilis|Ceanothus herbaceus|Prunus|Rosa|Rubus allegheniensis|Spiraea salicifolia|Vaccinium macrocarpon|Prunus cerasus	6	Rhamnaceae|Betulaceae|Salicaceae|Rosaceae|Fagaceae|Ericaceae	4	Rosales|Fagales|Malpighiales|Ericales	6	Quercus|Salix|Prunus|Fraxinus|Crataegus|Betula	13	Quercus|Quercus chrysolepis|Quercus velutina|Salix|Salix babylonica|Salix caprea|Salix cinerea|Salix hindsiana|Prunus virginiana|Fraxinus excelsior|Crataegus monogyna|Betula pumila|Salix exigua	5	Betulaceae|Rosaceae|Oleaceae|Fagaceae|Salicaceae	4	Fagales|Rosales|Lamiales|Malpighiales
Saturniidae	Hemileucinae	Hemileucini	Hemileuca	Hemileuca mania									1	Zea	1	Zea mays	1	Poaceae	1	Poales
Saturniidae	Hemileucinae	Hemileucini	Hemileuca	Hemileuca neumoegeni	3	Fallugia|Prunus|Rhus	3	Fallugia paradoxa|Prunus fasciculata|Rhus trilobata	2	Rosaceae|Anacardiaceae	2	Rosales|Sapindales	2	Prunus|Schinus	3	Prunus domestica|Prunus virginiana|Schinus terebinthifolius	2	Rosaceae|Anacardiaceae	2	Rosales|Sapindales
Saturniidae	Hemileucinae	Hemileucini	Hemileuca	Hemileuca nevadensis	16	Quercus|Populus|Salix|Ceanothus|Prunus|Chamaedaphne|Vaccinium|Ilex|Menyanthes|Carex|Alnus|Betula|Photinia|Potentilla|Spiraea|Lythrum	26	Quercus agrifolia|Quercus macrocarpa|Populus|Populus tremuloides|Salix|Salix exigua|Salix lasiolepis|Salix lucida|Ceanothus herbaceus|Prunus domestica|Populus deltoides|Salix longifolia|Chamaedaphne calyculata|Vaccinium macrocarpon|Ilex verticillata|Menyanthes trifoliata|Carex|Alnus incana|Betula pumila|Quercus|Salix pedicellaris|Photinia melanocarpa|Potentilla fruticosa|Spiraea alba|Lythrum sali…	10	Betulaceae|Cyperaceae|Rhamnaceae|Ericaceae|Aquifoliaceae|Lythraceae|Menyanthaceae|Rosaceae|Salicaceae|Fagaceae	8	Fagales|Poales|Rosales|Ericales|Aquifoliales|Myrtales|Asterales|Malpighiales	8	Corylus|Quercus|Salix|Crataegus|Prunus|Vaccinium|Menyanthes|Spiraea	14	Corylus|Quercus|Salix babylonica|Salix caprea|Salix cinerea|Crataegus|Prunus|Prunus virginiana|Vaccinium macrocarpon|Menyanthes trifoliata|Salix|Salix exigua|Spiraea alba|Salix discolor	6	Betulaceae|Rosaceae|Menyanthaceae|Fagaceae|Salicaceae|Ericaceae	5	Fagales|Rosales|Asterales|Malpighiales|Ericales
Saturniidae	Hemileucinae	Hemileucini	Hemileuca	Hemileuca nuttalli	6	Ribes|Symphoricarpos|Cercocarpus|Chamaebatiaria|Purshia|Spiraea	7	Ribes cereum|Symphoricarpos|Cercocarpus betuloides|Chamaebatiaria millefolium|Purshia tridentata|Symphoricarpos oreophilus|Spiraea	3	Rosaceae|Grossulariaceae|Caprifoliaceae	3	Rosales|Saxifragales|Dipsacales	3	Cercocarpus|Pyracantha|Symphoricarpos	4	Cercocarpus betuloides|Pyracantha sp.|Symphoricarpos albus|Symphoricarpos oreophilus	2	Rosaceae|Caprifoliaceae	2	Rosales|Dipsacales
Saturniidae	Hemileucinae	Hemileucini	Hemileuca	Hemileuca oliviae	18	Andropogon|Aristida|Avena|Bothriochloa|Bouteloua|Bromus|Buchloe|Distichlis|Elymus|Hilaria|Hordeum|Lycurus|Muhlenbergia|Schizachyrium|Sporobolus|Trachypogon|Triticum|Zea	20	Andropogon hallii|Aristida|Avena sativa|Bothriochloa barbinodis|Bouteloua curtipendula|Bouteloua gracilis|Bouteloua hirsuta|Bromus polyanthus|Buchloe dactyloides|Distichlis spicata|Elymus smithii|Hilaria mutica|Hordeum jubatum|Lycurus phleoides|Muhlenbergia texana?|Schizachyrium sanguineum|Sporobolus airoides|Trachypogon secundus|Triticum|Zea mays	1	Poaceae	NA	Poales	1	Sorghum	1	Sorghum bicolor	1	Poaceae	1	Poales
Saturniidae	Hemileucinae	Hemileucini	Hemileuca	Hemileuca peigleri	1	Quercus	5	Quercus fusiformis|Quercus shumardii|Quercus|Quercus havardii|Quercus texana	1	Fagaceae	1	Fagales	1	Quercus	1	Quercus robur	1	Fagaceae	1	Fagales
Saturniidae	Hemileucinae	Hemileucini	Hemileuca	Hemileuca peninsularis	1	Prosopis	1	Prosopis sp.	1	Fabaceae	1	Fabales	1	Acacia	1	Acacia baileyana	1	Fabaceae	1	Fabales
Saturniidae	Hemileucinae	Hemileucini	Hemileuca	Hemileuca rubridorsa									6	Mimosa|Robinia|Fagus|Quercus|Salix|Acacia	6	Mimosa dealbata|Robinia pseudoacacia|Fagus sylvatica|Quercus ilex|Salix|Acacia	3	Fabaceae|Fagaceae|Salicaceae	3	Fabales|Fagales|Malpighiales
Saturniidae	Hemileucinae	Hemileucini	Hemileuca	Hemileuca slosseri	1	Quercus	2	Quercus fusiformis|Quercus havardii	1	Fagaceae	1	Fagales	1	Quercus	4	Quercus fusiformis|Quercus palustris|Quercus macrocarpa|Quercus robur	1	Fagaceae	1	Fagales
Saturniidae	Hemileucinae	Hemileucini	Hemileuca	Hemileuca stonei	1	Quercus	2	Quercus emoryi|Quercus oblongifolia	1	Fagaceae	1	Fagales	1	Quercus	1	Quercus sp.	1	Fagaceae	1	Fagales
Saturniidae	Hemileucinae	Hemileucini	Hemileuca	Hemileuca tricolor	5	Sarcobatus|Parkinsonia|Acacia|Prosopis|Fouquieria	8	Sarcobatus vermiculatus|Parkinsonia sp.|Parkinsonia microphylla|Acacia constricta|Acacia greggii|Prosopis glandulosa|Fouquieria columnaris|Prosopis sp.	3	Fabaceae|Fouquieriaceae|Sarcobataceae	3	Fabales|Ericales|Caryophyllales	4	Gleditsia|Mimosa|Robinia|Quercus	5	Gleditsia triacanthos|Mimosa sp.|Robinia neomexicana|Quercus sp.|Quercus rubra	2	Fabaceae|Fagaceae	2	Fabales|Fagales
Saturniidae	Saturniinae	Bunaeini	Heniocha	Heniocha apollonia	2	Acacia|Sclerocarya	5	Acacia sp.|Acacia horrida|Acacia karroo|Acacia mearnsii|Sclerocarya birrea	2	Fabaceae|Anacardiaceae	2	Fabales|Sapindales
Saturniidae	Saturniinae	Bunaeini	Heniocha	Heniocha distincta	1	Elephantorrhiza	1	Elephantorrhiza elephantina	1	Fabaceae	1	Fabales
Saturniidae	Saturniinae	Bunaeini	Heniocha	Heniocha dyops	1	Acacia	7	Acacia burkei|Acacia erubescens|Acacia hereroensis|Acacia karroo|Acacia mearnsii|Acacia mellifera|Acacia nigrescens	1	Fabaceae	1	Fabales
Saturniidae	Saturniinae	Bunaeini	Heniocha	Heniocha marnois	1	Acacia	5	Acacia burkei|Acacia erubescens|Acacia mearnsii|Acacia nigrescens|Acacia polyacantha	1	Fabaceae	1	Fabales
Saturniidae	Saturniinae	Micragonini	Holocerina										1	Ligustrum	1	Ligustrum ovalifolium	1	Oleaceae	1	Lamiales
Saturniidae	Saturniinae	Micragonini	Holocerina	Holocerina agomensis	5	Bauhinia|Brachystegia|Uapaca|Monotes|Protea	6	Bauhinia reticulata|Brachystegia|Uapaca kirkiana|Uapaca nitida|Monotes glaber|Protea	4	Fabaceae|Dipterocarpaceae|Proteaceae|Phyllanthaceae	4	Fabales|Malvales|Proteales|Malpighiales	2	Galium|Laburnum	2	Galium sp.|Laburnum anagyroides	2	Rubiaceae|Fabaceae	2	Gentianales|Fabales
Saturniidae	Saturniinae	Micragonini	Holocerina	Holocerina angulata	8	Maesa|Spathodea|Bauhinia|Albizia|Sapium|Harungana|Ficus|Combretum	10	Maesa lanceolata|Spathodea campanulata|Bauhinia reticulata|Bauhinia thonningii|Albizia sp.|Sapium ellipticum|Harungana sp.|Ficus eriobotryoides|Ficus sur|Combretum sp.	7	Fabaceae|Combretaceae|Moraceae|Hypericaceae|Primulaceae|Euphorbiaceae|Bignoniaceae	6	Fabales|Myrtales|Rosales|Malpighiales|Ericales|Lamiales
Saturniidae	Saturniinae	Micragonini	Holocerina	Holocerina rhodesiensis	1	Cussonia	1	Cussonia spicata	1	Araliaceae	1	Apiales
Saturniidae	Saturniinae	Micragonini	Holocerina	Holocerina smilax	14	Spathodea|Bauhinia|Nuxia|Jasminum|Ligustrum|Halleria|Quercus|Psidium|Harpephyllum|Protorhus|Rhus|Schinus|Ekebergia|Pinus	19	Spathodea campanulata|Bauhinia|Nuxia floribunda|Jasminum pubigerum|Ligustrum lucidum|Halleria lucida|Quercus|Quercus robur|Psidium guajava|Harpephyllum caffrum|Protorhus longifolia|Rhus laevigata|Rhus villosa|Schinus molle|Ekebergia|Ekebergia capensis|Pinus caribaea|Pinus elliottii|Pinus radiata	9	Fabaceae|Meliaceae|Stilbaceae|Anacardiaceae|Oleaceae|Pinaceae|Myrtaceae|Fagaceae|Bignoniaceae	6	Fabales|Sapindales|Lamiales|Pinales|Myrtales|Fagales	7	Quercus|Pinus|Jasminum|Ligustrum|Syringa|Malus|Rhus	8	Quercus gambelii|Pinus patula|Jasminum|Ligustrum|Syringa vulgaris|Malus domestica|Rhus glabra|Rhus trilobata	5	Oleaceae|Rosaceae|Pinaceae|Fagaceae|Anacardiaceae	5	Lamiales|Rosales|Pinales|Fagales|Sapindales
Saturniidae	Oxyteninae		Homoeopteryx	Homoeopteryx malecena	1	Faramea	1	Faramea occidentalis	1	Rubiaceae	1	Gentianales
Saturniidae	Saturniinae	Attacini	Hyalophora		8	Salix|Prunus|Ribes|Alnus|Shepherdia|Ceanothus|Amelanchier|Acer	11	Salix exigua|Prunus virginiana|Ribes|Ribes divaricatum|Ribes sanguineum|Alnus rubra|Salix|Shepherdia canadensis|Ceanothus sanguineus|Amelanchier alnifolia|Acer glabrum	7	Sapindaceae|Betulaceae|Rosaceae|Rhamnaceae|Grossulariaceae|Salicaceae|Elaeagnaceae	5	Sapindales|Fagales|Rosales|Saxifragales|Malpighiales	7	Salix|Elaeagnus|Shepherdia|Ceanothus|Frangula|Prunus|Pseudotsuga	12	Salix exigua|Elaeagnus angustifolia|Shepherdia argentea|Ceanothus cordulatus|Ceanothus integerrimus|Ceanothus sanguineus|Ceanothus velutinus|Frangula purshiana|Frangula rubra|Prunus emarginata|Prunus virginiana|Pseudotsuga menziesii	5	Rhamnaceae|Elaeagnaceae|Rosaceae|Pinaceae|Salicaceae	3	Rosales|Pinales|Malpighiales
Saturniidae	Saturniinae	Attacini	Hyalophora	Hyalophora cecropia	54	Ribes|Paeonia|Cornus|Philadelphus|Gaylussacia|Vaccinium|Sambucus|Lonicera|Symphoricarpos|Cephalanthus|Fraxinus|Syringa|Sassafras|Liriodendron|Berberis|Gleditsia|Caragana|Wisteria|Alnus|Betula|Carpinus|Corylus|Ostrya|Fagus|Quercus|Carya|Juglans|Myrica|Populus|Salix|Humulus|Elaeagnus|Ceanothus|Frangula|Amelanchier|Crataegus|Heteromeles|Malus|Physocarpus|Prunus|Pyrus|Rosa|Rubus|Sorbus|Spiraea|Ulmus|…	122	Ribes|Ribes americanum|Ribes nigrum|Ribes rubrum|Ribes uva-crispa|Paeonia officinalis|Cornus alba|Cornus sericea|Philadelphus inodorus|Gaylussacia frondosa|Vaccinium|Sambucus|Sambucus nigra|Sambucus racemosa|Lonicera fragrantissima|Lonicera tatarica|Symphoricarpos racemosus|Cephalanthus|Cephalanthus occidentalis|Fraxinus|Fraxinus pennsylvanica|Syringa|Syringa vulgaris|Sassafras albidum|Liriodendr…	29	Sapindaceae|Betulaceae|Rosaceae|Berberidaceae|Fabaceae|Juglandaceae|Rhamnaceae|Rubiaceae|Cornaceae|Lythraceae|Elaeagnaceae|Fagaceae|Oleaceae|Ericaceae|Cannabaceae|Pinaceae|Magnoliaceae|Caprifoliaceae|Myricaceae|Paeoniaceae|Vitaceae|Hydrangeaceae|Salicaceae|Anacardiaceae|Grossulariaceae|Adoxaceae|Lauraceae|Malvaceae|Ulmaceae	18	Sapindales|Fagales|Rosales|Ranunculales|Fabales|Gentianales|Cornales|Myrtales|Lamiales|Ericales|Pinales|Magnoliales|Dipsacales|Saxifragales|Vitales|Malpighiales|Laurales|Malvales	47	Ribes|Liquidambar|Hamamelis|Cornus|Nyssa|Diospyros|Sanicula|Sambucus|Viburnum|Lonicera|Fraxinus|Ligustrum|Syringa|Platanus|Euonymus|Robinia|Alnus|Betula|Corylus|Castanea|Quercus|Carya|Juglans|Populus|Salix|Maclura|Ceanothus|Frangula|Chaenomeles|Cotoneaster|Crataegus|Malus|Prunus|Pyrus|Rosa|Rubus|Spiraea|Ulmus|Tilia|Acer|Rhus|Schinus|Aesculus|Larix|Tsuga|Morus|Malosma	96	Ribes|Liquidambar styraciflua|Hamamelis virginiana|Cornus alba|Cornus florida|Cornus racemosa|Cornus sanguinea|Cornus sericea|Nyssa sylvatica|Diospyros virginiana|Sanicula smallii|Sambucus|Sambucus nigra|Viburnum dentatum|Viburnum tomentosum|Lonicera tatarica|Fraxinus|Fraxinus pennsylvanica|Ligustrum|Syringa chinensis|Syringa vulgaris|Platanus occidentalis|Euonymus alatus|Robinia pseudoacacia|Aln…	25	Sapindaceae|Betulaceae|Juglandaceae|Fagaceae|Rhamnaceae|Rosaceae|Cornaceae|Ebenaceae|Celastraceae|Oleaceae|Hamamelidaceae|Pinaceae|Altingiaceae|Caprifoliaceae|Moraceae|Anacardiaceae|Nyssaceae|Platanaceae|Salicaceae|Grossulariaceae|Fabaceae|Adoxaceae|Apiaceae|Malvaceae|Ulmaceae	15	Sapindales|Fagales|Rosales|Cornales|Ericales|Celastrales|Lamiales|Saxifragales|Pinales|Dipsacales|Proteales|Malpighiales|Fabales|Apiales|Malvales
Saturniidae	Saturniinae	Attacini	Hyalophora	Hyalophora columbia	20	Alnus|Betula|Salix|Prunus|Spiraea|Ulmus|Abies|Larix|Picea|Tsuga|Ribes|Arctostaphylos|Myrica|Elaeagnus|Shepherdia|Ceanothus|Cercocarpus|Purshia|Rosa|Acer	41	Alnus incana|Betula papyrifera|Salix|Prunus cerasus|Prunus pensylvanica|Spiraea tomentosa|Ulmus|Abies alba|Abies balsamea|Abies canadensis|Abies nigra|Larix|Larix laricina|Picea glauca|Picea mariana|Tsuga canadensis|Ribes|Ribes lacustre|Ribes rubrum|Arctostaphylos pungens|Alnus|Myrica pensylvanica|Salix exigua|Salix hindsiana|Elaeagnus angustifolia|Shepherdia|Shepherdia argentea|Ceanothus greggii…	11	Pinaceae|Sapindaceae|Betulaceae|Ericaceae|Rhamnaceae|Rosaceae|Elaeagnaceae|Myricaceae|Grossulariaceae|Salicaceae|Ulmaceae	7	Pinales|Sapindales|Fagales|Ericales|Rosales|Saxifragales|Malpighiales	16	Betula|Salix|Elaeagnus|Prunus|Larix|Arctostaphylos|Ligustrum|Syringa|Alnus|Shepherdia|Ceanothus|Lythrum|Pseudotsuga|Crataegus|Ribes|Rhus	29	Betula|Salix babylonica|Salix nigra|Elaeagnus angustifolia|Prunus virginiana|Larix laricina|Arctostaphylos patula|Ligustrum|Syringa vulgaris|Alnus|Betula pendula|Salix|Salix caprea|Shepherdia|Ceanothus velutinus|Prunus|Prunus domestica|Prunus serotina|Lythrum salicaria|Larix|Larix decidua|Pseudotsuga menziesii|Salix alba|Crataegus monogyna|Prunus spinosa|Ribes alpinum|Arctostaphylos|Salix discolo…	11	Betulaceae|Ericaceae|Rhamnaceae|Rosaceae|Elaeagnaceae|Pinaceae|Oleaceae|Lythraceae|Anacardiaceae|Grossulariaceae|Salicaceae	9	Fagales|Ericales|Rosales|Pinales|Lamiales|Myrtales|Sapindales|Saxifragales|Malpighiales
Saturniidae	Saturniinae	Attacini	Hyalophora	Hyalophora euryalus	28	Ribes|Arbutus|Arctostaphylos|Alnus|Betula|Corylus|Quercus|Salix|Elaeagnus|Ceanothus|Frangula|Amelanchier|Cercocarpus|Heteromeles|Prunus|Purshia|Rosa|Acer|Malosma|Pachycormus|Rhus|Schinus|Larix|Picea|Pseudotsuga|Carpinus|Rhamnus|Malus	51	Ribes|Ribes sanguineum|Arbutus|Arbutus menziesii|Arctostaphylos|Arctostaphylos patula|Alnus|Alnus rubra|Betula|Betula papyrifera|Corylus|Quercus|Salix|Salix exigua|Elaeagnus angustifolia|Ceanothus|Ceanothus cordulatus|Ceanothus integerrimus|Ceanothus megacarpus|Ceanothus sanguineus|Ceanothus spinosus|Ceanothus velutinus|Frangula purshiana|Amelanchier alnifolia|Cercocarpus betuloides|Heteromeles a…	11	Sapindaceae|Betulaceae|Rosaceae|Ericaceae|Rhamnaceae|Elaeagnaceae|Pinaceae|Anacardiaceae|Fagaceae|Grossulariaceae|Salicaceae	7	Sapindales|Fagales|Rosales|Ericales|Pinales|Saxifragales|Malpighiales	18	Arbutus|Arctostaphylos|Coffea|Syringa|Betula|Shepherdia|Ceanothus|Prunus|Rosa|Pseudotsuga|Cephalanthus|Salix|Crataegus|Malus|Schinus|Ribes|Liquidambar|Malosma	30	Arbutus menziesii|Arctostaphylos patula|Coffea|Syringa vulgaris|Betula|Shepherdia argentea|Ceanothus|Ceanothus integerrimus|Prunus|Prunus emarginata|Prunus serotina|Prunus virginiana|Rosa|Pseudotsuga menziesii|Cephalanthus occidentalis|Salix|Salix alba|Salix caprea|Salix viminalis|Crataegus monogyna|Malus|Prunus avium|Prunus domestica|Prunus spinosa|Schinus molle|Ribes alpinum|Liquidambar styraci…	12	Ericaceae|Betulaceae|Rhamnaceae|Rubiaceae|Rosaceae|Altingiaceae|Anacardiaceae|Pinaceae|Grossulariaceae|Salicaceae|Elaeagnaceae|Oleaceae	9	Ericales|Fagales|Rosales|Gentianales|Saxifragales|Sapindales|Pinales|Malpighiales|Lamiales
Saturniidae	Hemileucinae	Hemileucini	Hylesia		1	Virola	1	Virola koschnyi	1	Myristicaceae	1	Magnoliales
Saturniidae	Hemileucinae	Hemileucini	Hylesia		24	Ilex|Vernonanthura|Tabebuia|Coccoloba|Annona|Xylopia|Meliosma|Senna|Mimosa|Croton|Ricinus|Prunus|Ochroma|Gossypium|Theobroma|Eucalyptus|Myrcia|Psidium|Schinus|Swietenia|Citrus|Sapindus|Serjania|Lantana	30	Ilex paraguariensis|Vernonanthura brasiliana|Tabebuia rosea|Coccoloba|Annona muricata|Annona purpurea|Xylopia macrantha|Meliosma glabrata|Senna alata|Senna papillosa|Senna siamea|Mimosa avenosa|Croton floribunda|Croton schiedeanus|Ricinus communis|Prunus sp.|Prunus persica|Ochroma pyramidale|Gossypium sp.|Theobroma cacao|Eucalyptus sp.|Myrcia splendens|Psidium guajava|Schinus terebinthifolius|Swi…	16	Annonaceae|Rutaceae|Polygonaceae|Euphorbiaceae|Myrtaceae|Malvaceae|Aquifoliaceae|Verbenaceae|Sabiaceae|Fabaceae|Rosaceae|Sapindaceae|Anacardiaceae|Meliaceae|Bignoniaceae|Asteraceae	12	Magnoliales|Sapindales|Caryophyllales|Malpighiales|Myrtales|Malvales|Aquifoliales|Lamiales|Proteales|Fabales|Rosales|Asterales	2	Mentha|Salvia	2	Mentha arvensis|Salvia sp.	1	Lamiaceae	1	Lamiales
Saturniidae	Hemileucinae	Hemileucini	Hylesia	Hylesia acuta									2	Schinus|Bursera	2	Schinus terebinthifolius|Bursera simaruba	2	Burseraceae|Anacardiaceae	1	Sapindales
Saturniidae	Hemileucinae	Hemileucini	Hylesia	Hylesia aeneides	30	Clibadium|Pentagonia|Hedychium|Nectandra|Ocotea|Inga|Dioclea|Lonchocarpus|Croton|Hyeronima|Cespedesia|Myriocarpa|Heliocarpus|Trichospermum|Psidium|Guatteria|Lepidaploa|Zexmenia|Calophyllum|Chrysobalanus|Acalypha|Pausandra|Sapium|Alfaroa|Mortoniodendron|Myrcia|Hieronyma|Ardisia|Cestrum|Coussapoa	38	Clibadium sp.|Pentagonia donnell-smithii|Hedychium coronarium|Nectandra hihua|Nectandra martinicensis|Nectandra umbrosa|Ocotea insularis|Inga oerstediana|Inga punctata|Inga samanensis|Dioclea malacocarpa|Lonchocarpus macrophyllus|Croton schiedeanus|Hyeronima sp.|Cespedesia spathulata|Myriocarpa longipes|Heliocarpus appendiculatus|Trichospermum grewiifolium|Psidium guajava|Guatteria amplifolia|Lep…	17	Euphorbiaceae|Juglandaceae|Primulaceae|Calophyllaceae|Ochnaceae|Solanaceae|Chrysobalanaceae|Asteraceae|Urticaceae|Fabaceae|Annonaceae|Zingiberaceae|Malvaceae|Phyllanthaceae|Myrtaceae|Lauraceae|Rubiaceae	13	Malpighiales|Fagales|Ericales|Solanales|Asterales|Rosales|Fabales|Magnoliales|Zingiberales|Malvales|Myrtales|Laurales|Gentianales
Saturniidae	Hemileucinae	Hemileucini	Hylesia	Hylesia coex	3	Annona|Mimosa|Hura	5	Annona cherimola|Annona muricata|Annona purpurea|Mimosa avenosa|Hura crepitans	3	Annonaceae|Euphorbiaceae|Fabaceae	3	Magnoliales|Malpighiales|Fabales
Saturniidae	Hemileucinae	Hemileucini	Hylesia	Hylesia continua	100	Psidium|Persea|Ardisia|Clibadium|Vernonanthura|Chimarrhis|Pentagonia|Randia|Mendoncia|Tabebuia|Vitex|Solanum|Witheringia|Cordia|Coccoloba|Hedychium|Renealmia|Nectandra|Siparuna|Annona|Otoba|Virola|Piper|Sclerolobium|Senna|Inga|Pithecellobium|Zygia|Andira|Dioclea|Lonchocarpus|Alfaroa|Hirtella|Acalypha|Croton|Casearia|Zuelania|Hasseltia|Symphonia|Vismia|Hiraea|Tetrapterys|Cecropia|Coussapoa|Prunus|…	145	Psidium friedrichsthalianum|Persea americana|Ardisia sp.|Ardisia revoluta|Clibadium sp.|Vernonanthura patens|Chimarrhis parviflora|Pentagonia donnell-smithii|Randia sp.|Mendoncia retusa|Tabebuia rosea|Vitex cooperi|Solanum hayesii|Witheringia solanacea|Cordia alliodora|Coccoloba guanacastensis|Coccoloba porphyrostachys|Hedychium coronarium|Renealmia aromatica|Nectandra hihua|Siparuna thecophora|A…	43	Euphorbiaceae|Juglandaceae|Sapindaceae|Cyatheaceae|Fabaceae|Annonaceae|Primulaceae|Malpighiaceae|Myrtaceae|Salicaceae|Urticaceae|Ochnaceae|Rubiaceae|Clethraceae|Asteraceae|Melastomataceae|Polygonaceae|Combretaceae|Boraginaceae|Dilleniaceae|Ebenaceae|Meliaceae|Malvaceae|Zingiberaceae|Chrysobalanaceae|Convolvulaceae|Acanthaceae|Muntingiaceae|Moraceae|Lauraceae|Myristicaceae|Piperaceae|Rosaceae|Sima…	21	Malpighiales|Fagales|Sapindales|Cyatheales|Fabales|Magnoliales|Ericales|Myrtales|Rosales|Gentianales|Asterales|Caryophyllales|Boraginales|Dilleniales|Malvales|Zingiberales|Solanales|Lamiales|Laurales|Piperales
Saturniidae	Hemileucinae	Hemileucini	Hylesia	Hylesia cressida									2	Arbutus|Quercus	2	Arbutus unedo|Quercus sp.	2	Ericaceae|Fagaceae	2	Ericales|Fagales
Saturniidae	Hemileucinae	Hemileucini	Hylesia	Hylesia dalina	23	Calycophyllum|Uncaria|Gmelina|Annona|Bauhinia|Inga|Croton|Casearia|Luehea|Muntingia|Psidium|Cedrela|Vitex|Guazuma|Ochroma|Myrcia|Hieronyma|Tabebuia|Hampea|Trichospermum|Licania|Banisteriopsis|Triplaris	26	Calycophyllum candidissimum|Uncaria tomentosa|Gmelina arborea|Annona purpurea|Bauhinia ungulata|Inga punctata|Croton billbergianus|Croton schiedeanus|Casearia arguta|Luehea candida|Muntingia calabura|Psidium guajava|Cedrela odorata|Vitex cooperi|Guazuma ulmifolia|Luehea seemannii|Ochroma pyramidale|Myrcia splendens|Hieronyma oblonga|Casearia arborea|Tabebuia rosea|Hampea appendiculata|Trichosperm…	15	Annonaceae|Malpighiaceae|Fabaceae|Rubiaceae|Salicaceae|Meliaceae|Euphorbiaceae|Lamiaceae|Malvaceae|Phyllanthaceae|Chrysobalanaceae|Muntingiaceae|Myrtaceae|Bignoniaceae|Polygonaceae	9	Magnoliales|Malpighiales|Fabales|Gentianales|Sapindales|Lamiales|Malvales|Myrtales|Caryophyllales
Saturniidae	Hemileucinae	Hemileucini	Hylesia	Hylesia ebalus	4	Miconia|Tibouchina|Aspidosperma|Psidium	5	Miconia albicans|Tibouchina stenocarpa|Aspidosperma macrocarpon|Tibouchina holosericea|Psidium guajava	3	Apocynaceae|Melastomataceae|Myrtaceae	2	Gentianales|Myrtales
Saturniidae	Hemileucinae	Hemileucini	Hylesia	Hylesia falcifera	3	Albizia|Mimosa|Syzygium	3	Albizia lebbeck|Mimosa sp.|Syzygium jambos	2	Fabaceae|Myrtaceae	2	Fabales|Myrtales
Saturniidae	Hemileucinae	Hemileucini	Hylesia	Hylesia frigida	3	Arbutus|Quercus|Pinus	5	Arbutus|Arbutus glandulosa|Quercus|Pinus|Pinus maximinoi	3	Ericaceae|Pinaceae|Fagaceae	3	Ericales|Pinales|Fagales
Saturniidae	Hemileucinae	Hemileucini	Hylesia	Hylesia hamata	1	Inga	1	Inga oerstediana	1	Fabaceae	1	Fabales
Saturniidae	Hemileucinae	Hemileucini	Hylesia	Hylesia invidiosa	4	Byrsonima|Hampea|Hymenolobium|Cedrela	4	Byrsonima crassifolia|Hampea appendiculata|Hymenolobium mesoamericanum|Cedrela odorata	4	Malpighiaceae|Meliaceae|Malvaceae|Fabaceae	4	Malpighiales|Sapindales|Malvales|Fabales
Saturniidae	Hemileucinae	Hemileucini	Hylesia	Hylesia iola	4	Simsia|Zea|Sicyos|Prunus	4	Simsia amplexicaulis|Zea mays|Sicyos angulata|Prunus capuli	4	Rosaceae|Cucurbitaceae|Asteraceae|Poaceae	4	Rosales|Cucurbitales|Asterales|Poales
Saturniidae	Hemileucinae	Hemileucini	Hylesia	Hylesia lineata	94	Chrysophyllum|Calycophyllum|Chomelia|Exostema|Guettarda|Tabebuia|Lantana|Rehdera|Vitex|Cordia|Coccoloba|Triplaris|Ocotea|Persea|Annona|Bauhinia|Cassia|Haematoxylum|Hymenaea|Senna|Acacia|Calliandra|Chloroleucon|Enterolobium|Inga|Lysiloma|Mimosa|Pithecellobium|Sphinga|Acosmium|Andira|Apoplanesia|Dalbergia|Gliricidia|Lonchocarpus|Machaerium|Myrospermum|Piscidia|Platymiscium|Sesbania|Securidaca|Querc…	134	Chrysophyllum brenesii|Calycophyllum candidissimum|Chomelia spinosa|Exostema mexicanum|Guettarda macrosperma|Tabebuia ochracea|Tabebuia rosea|Lantana camara|Rehdera trinervis|Vitex sp.|Cordia alliodora|Cordia panamensis|Coccoloba guanacastensis|Triplaris melaenodenron|Ocotea veraguensis|Persea americana|Annona purpurea|Bauhinia divaricata|Bauhinia glabra|Bauhinia ungulata|Cassia fistula|Cassia gr…	33	Fabaceae|Sapindaceae|Malvaceae|Annonaceae|Phyllanthaceae|Malpighiaceae|Rubiaceae|Salicaceae|Urticaceae|Sapotaceae|Polygonaceae|Combretaceae|Boraginaceae|Euphorbiaceae|Erythroxylaceae|Rhamnaceae|Bignoniaceae|Chrysobalanaceae|Verbenaceae|Melastomataceae|Muntingiaceae|Lauraceae|Ochnaceae|Passifloraceae|Myrtaceae|Fagaceae|Surianaceae|Polygalaceae|Anacardiaceae|Cannabaceae|Trigoniaceae|Lamiaceae|Rutac…	14	Fabales|Sapindales|Malvales|Magnoliales|Malpighiales|Gentianales|Rosales|Ericales|Caryophyllales|Myrtales|Boraginales|Lamiales|Laurales|Fagales	4	Robinia|Luehea|Acacia|Quercus	4	Robinia pseudoacacia|Luehea speciosa|Acacia baileyana|Quercus sp.	3	Fabaceae|Malvaceae|Fagaceae	3	Fabales|Malvales|Fagales
Saturniidae	Hemileucinae	Hemileucini	Hylesia	Hylesia metabus	1	Rhizophora	1	Rhizophora mangle	1	Rhizophoraceae	1	Malpighiales	1	Rhizophora	1	Rhizophora mangle	1	Rhizophoraceae	1	Malpighiales
Saturniidae	Hemileucinae	Hemileucini	Hylesia	Hylesia metapyrrha	1	Myrciaria	1	Myrciaria cauliflora	1	Myrtaceae	1	Myrtales
Saturniidae	Hemileucinae	Hemileucini	Hylesia	Hylesia murex	9	Diospyros|Emmotum|Annona|Hymenaea|Schizolobium|Senna|Pterodon|Caryocar|Ouratea	10	Diospyros hispida|Diospyros sericea|Emmotum nitens|Annona crassiflora|Hymenaea stigonocarpa|Schizolobium parhybum|Senna siamea|Pterodon emarginatus|Caryocar brasiliense|Ouratea acuminata	6	Annonaceae|Caryocaraceae|Ebenaceae|Metteniusaceae|Fabaceae|Ochnaceae	5	Magnoliales|Malpighiales|Ericales|Metteniusales|Fabales
Saturniidae	Hemileucinae	Hemileucini	Hylesia	Hylesia nanus	7	Psidium|Schinus|Calycophyllum|Acacia|Terminalia|Lafoensia|Anacardium	7	Psidium guajava|Schinus terebinthifolius|Calycophyllum spruceanum|Acacia mearnsii|Terminalia catappa|Lafoensia glyptocarpa|Anacardium occidentale	6	Fabaceae|Anacardiaceae|Rubiaceae|Lythraceae|Myrtaceae|Combretaceae	4	Fabales|Sapindales|Gentianales|Myrtales
Saturniidae	Hemileucinae	Hemileucini	Hylesia	Hylesia nigricans	17	Ilex|Nectandra|Ocotea|Platanus|Acacia|Prosopis|Quercus|Juglans|Populus|Salix|Cydonia|Malus|Prunus|Pyrus|Campomanesia|Eugenia|Acer	24	Ilex paraguariensis|Nectandra angustifolia|Ocotea diospyrifolia|Ocotea laxa|Platanus|Platanus orientalis|Acacia|Prosopis nigra|Quercus|Juglans|Populus|Populus nigra|Salix|Salix babylonica|Salix humboldtiana|Cydonia oblonga|Malus domestica|Prunus domestica|Prunus persica|Pyrus communis|Campomanesia xanthocarpa|Eugenia myrobalana|Acer|Ilex	10	Fabaceae|Sapindaceae|Myrtaceae|Rosaceae|Aquifoliaceae|Juglandaceae|Lauraceae|Platanaceae|Salicaceae|Fagaceae	9	Fabales|Sapindales|Myrtales|Rosales|Aquifoliales|Fagales|Laurales|Proteales|Malpighiales	3	Carpinus|Quercus|Malus	3	Carpinus betulus|Quercus ilex|Malus sp.	3	Betulaceae|Rosaceae|Fagaceae	2	Fagales|Rosales
Saturniidae	Hemileucinae	Hemileucini	Hylesia	Hylesia oratex	1	Ilex	1	Ilex paraguariensis	1	Aquifoliaceae	1	Aquifoliales
Saturniidae	Hemileucinae	Hemileucini	Hylesia	Hylesia paulex	1	Prunus	1	Prunus domestica	1	Rosaceae	1	Rosales
Saturniidae	Hemileucinae	Hemileucini	Hylesia	Hylesia remex	2	Porlieria|Gossypium	2	Porlieria microphylla|Gossypium herbaceum	2	Malvaceae|Zygophyllaceae	2	Malvales|Zygophyllales
Saturniidae	Hemileucinae	Hemileucini	Hylesia	Hylesia rubrifrons	14	Piptocarpha|Anthurium|Senna|Vismia|Myriocarpa|Urera|Hampea|Annona|Inga|Schnella|Heliocarpus|Virola|Coccoloba|Siparuna	16	Piptocarpha poeppigiana|Anthurium|Senna obtusifolia|Vismia baccifera|Myriocarpa longipes|Urera elata|Hampea appendiculata|Annona rensoniana|Anthurium obtusilobum|Inga oerstediana|Schnella guianensis|Senna papillosa|Heliocarpus appendiculatus|Virola koschnyi|Coccoloba tuerckheimii|Siparuna thecophora	10	Annonaceae|Araceae|Polygonaceae|Malvaceae|Fabaceae|Urticaceae|Asteraceae|Siparunaceae|Myristicaceae|Hypericaceae	9	Magnoliales|Alismatales|Caryophyllales|Malvales|Fabales|Rosales|Asterales|Laurales|Malpighiales
Saturniidae	Hemileucinae	Hemileucini	Hylesia	Hylesia rufipes	8	Dioclea|Alchornea|Canavalia|Inga|Mimosa|Tetrapterys|Cespedesia|Coccoloba	8	Dioclea wilsonii|Alchornea latifolia|Canavalia oxyphylla|Inga oerstediana|Mimosa watsonii|Tetrapterys styloptera|Cespedesia spathulata|Coccoloba tuerckheimii	5	Euphorbiaceae|Fabaceae|Ochnaceae|Polygonaceae|Malpighiaceae	3	Malpighiales|Fabales|Caryophyllales
Saturniidae	Hemileucinae	Hemileucini	Hylesia	Hylesia schuessleri	16	Diospyros|Myrsine|Pouteria|Aspidosperma|Chomelia|Annona|Roupala|Bauhinia|Stryphnodendron|Machaerium|Caryocar|Erythroxylum|Casearia|Kielmeyera|Ouratea|Rourea	17	Diospyros burchellii|Myrsine guianensis|Pouteria ramiflora|Aspidosperma tomentosum|Chomelia ribesiodes|Annona crassiflora|Roupala montana|Bauhinia sp.|Stryphnodendron adstringens|Machaerium acutifolium|Caryocar brasiliense|Erythroxylum deciduum|Erythroxylum tortuosum|Casearia sylvestris|Kielmeyera coriacea|Ouratea hexasperma|Rourea induta	14	Annonaceae|Apocynaceae|Fabaceae|Caryocaraceae|Salicaceae|Rubiaceae|Ebenaceae|Erythroxylaceae|Calophyllaceae|Primulaceae|Ochnaceae|Sapotaceae|Proteaceae|Connaraceae	7	Magnoliales|Gentianales|Fabales|Malpighiales|Ericales|Proteales|Oxalidales
Saturniidae	Hemileucinae	Hemileucini	Hylesia	Hylesia scortina	5	Patagonula|Ruprechtia|Alchornea|Croton|Celtis	5	Patagonula americana|Ruprechtia laxiflora|Alchornea iricurana|Croton|Celtis pubescens	4	Euphorbiaceae|Cannabaceae|Boraginaceae|Polygonaceae	4	Malpighiales|Rosales|Boraginales|Caryophyllales
Saturniidae	Hemileucinae	Hemileucini	Hylesia	Hylesia tapabex	1	Melicoccus	1	Melicoccus bijugatus	1	Sapindaceae	1	Sapindales
Saturniidae	Hemileucinae	Hemileucini	Hylesia	Hylesia umbrata	7	Annona|Zuelania|Byrsonima|Ochroma|Anacardium|Croton|Sapium	7	Annona purpurea|Zuelania guidonia|Byrsonima crassifolia|Ochroma pyramidale|Anacardium occidentale|Croton schiedeanus|Sapium laurifolium	6	Anacardiaceae|Annonaceae|Malpighiaceae|Euphorbiaceae|Malvaceae|Salicaceae	4	Sapindales|Magnoliales|Malpighiales|Malvales
Saturniidae	Hemileucinae	Hemileucini	Hyperchiria	Hyperchiria incisa	26	Platanus|Wisteria|Ficus|Clethra|Nectandra|Roupala|Berberis|Maytenus|Bauhinia|Caesalpinia|Cassia|Ateleia|Canavalia|Centrolobium|Clitoria|Erythrina|Machaerium|Myroxylon|Quercus|Celtis|Trema|Lafoensia|Acer|Sapindus|Serjania|Senna	30	Platanus orientalis|Wisteria|Ficus benjamina|Clethra scabra|Nectandra lanceolata|Platanus x hispanica|Roupala|Berberis laurina|Maytenus truncata|Bauhinia|Bauhinia forficata|Caesalpinia pluviosa|Cassia|Cassia javanica|Ateleia glazioveana|Canavalia ensiformis|Centrolobium tomentosum|Clitoria fairchildiana|Erythrina crista-galli|Machaerium opacum|Myroxylon balsamum|Quercus coccifera|Celtis iguanaea|…	12	Sapindaceae|Fabaceae|Berberidaceae|Cannabaceae|Clethraceae|Moraceae|Lythraceae|Celastraceae|Lauraceae|Platanaceae|Fagaceae|Proteaceae	10	Sapindales|Fabales|Ranunculales|Rosales|Ericales|Myrtales|Celastrales|Laurales|Proteales|Fagales	6	Laburnum|Fagus|Quercus|Salix|Betula|Prunus	8	Laburnum anagyroides|Fagus sylvatica|Quercus|Quercus ilex|Salix|Betula|Prunus avium|Prunus domestica	5	Betulaceae|Fagaceae|Fabaceae|Rosaceae|Salicaceae	4	Fagales|Fabales|Rosales|Malpighiales
Saturniidae	Hemileucinae	Hemileucini	Hyperchiria	Hyperchiria nausica	6	Senna|Inga|Anacardium|Trema|Dioclea|Mucuna	7	Senna alata|Senna papillosa|Inga oerstediana|Anacardium|Trema micrantha|Dioclea malacocarpa|Mucuna holtonii	3	Anacardiaceae|Fabaceae|Cannabaceae	3	Sapindales|Fabales|Rosales	4	Acacia|Laburnum|Robinia|Fagus	4	Acacia baileyana|Laburnum anagyroides|Robinia pseudoacacia|Fagus sylvatica	2	Fabaceae|Fagaceae	2	Fabales|Fagales
Saturniidae	Hemileucinae	Hemileucini	Hyperchiria	Hyperchiria orodina	2	Roupala|Serjania	2	Roupala montana|Serjania sp.	2	Proteaceae|Sapindaceae	2	Proteales|Sapindales	3	Acacia|Platanus|Robinia	3	Acacia baileyana|Platanus orientalis|Robinia pseudoacacia	2	Fabaceae|Platanaceae	2	Fabales|Proteales
Saturniidae	Saturniinae	Bunaeini	Imbrasia		1	Citrus	1	Citrus maxima	1	Rutaceae	1	Sapindales
Saturniidae	Saturniinae	Bunaeini	Imbrasia	Imbrasia epimethea	16	Petersianthus|Diplorhynchus|Funtumia|Holarrhena|Berlinia|Brachystegia|Burkea|Isoberlinia|Julbernardia|Acacia|Albizia|Ricinodendron|Musanga|Mangifera|Aucoumea|Maesopsis	23	Petersianthus macrocarpus|Diplorhynchus condylocarpon|Funtumia|Funtumia africana|Holarrhena floribunda|Berlinia|Brachystegia|Brachystegia glaberrima|Brachystegia spiciformis|Burkea africana|Isoberlinia angolensis|Julbernardia paniculata|Acacia auriculiformis|Acacia decurrens|Acacia lahai|Albizia|Ricinodendron heudelotii|Musanga cecropoides|Mangifera|Aucoumea klaineana|Acacia mearnsii|Maesopsis em…	8	Fabaceae|Burseraceae|Apocynaceae|Rhamnaceae|Anacardiaceae|Urticaceae|Lecythidaceae|Euphorbiaceae	6	Fabales|Sapindales|Gentianales|Rosales|Ericales|Malpighiales	1	Salix	1	Salix caprea	1	Salicaceae	1	Malpighiales
Saturniidae	Saturniinae	Bunaeini	Imbrasia	Imbrasia ertli	9	Petersianthus|Funtumia|Holarrhena|Berlinia|Brachystegia|Julbernardia|Acacia|Ricinodendron|Ekebergia	12	Petersianthus macrocarpus|Funtumia africana|Holarrhena floribunda|Berlinia|Brachystegia glaucescens|Brachystegia spiciformis|Julbernardia globiflora|Julbernardia paniculata|Acacia|Ricinodendron heudelotii|Ekebergia|Ekebergia capensis	5	Fabaceae|Meliaceae|Apocynaceae|Lecythidaceae|Euphorbiaceae	5	Fabales|Sapindales|Gentianales|Ericales|Malpighiales	3	Acacia|Laburnum|Robinia	3	Acacia auriculiformis|Laburnum anagyroides|Robinia pseudoacacia	1	Fabaceae	1	Fabales
Saturniidae	Saturniinae	Bunaeini	Imbrasia	Imbrasia longicaudata	1	Aucoumea	1	Aucoumea klaineana	1	Burseraceae	1	Sapindales
Saturniidae	Saturniinae	Bunaeini	Imbrasia	Imbrasia obscura	5	Albizia|Pentaclethra|Macaranga|Canarium|Uapaca	6	Albizia sp.|Albizia ferruginea|Pentaclethra macrophylla|Macaranga hurifolia|Canarium schweinfurthii|Uapaca kirkiana	4	Fabaceae|Burseraceae|Euphorbiaceae|Phyllanthaceae	3	Fabales|Sapindales|Malpighiales	1	Acacia	1	Acacia auriculiformis	1	Fabaceae	1	Fabales
Saturniidae	Saturniinae	Bunaeini	Imbrasia	Imbrasia truncata	1	Newtonia	1	Newtonia sp.	1	Fabaceae	1	Fabales
Saturniidae	Hemileucinae	Hemileucini	Ithomisa		1	Paepalanthus	1	Paepalanthus polyanthus	1	Eriocaulaceae	1	Poales
Saturniidae	Hemileucinae	Hemileucini	Ithomisa	Ithomisa catherina	2	Eryngium|Salix	3	Eryngium elegans|Eryngium paniculatum|Salix x blanda	2	Apiaceae|Salicaceae	2	Apiales|Malpighiales
Saturniidae	Hemileucinae	Hemileucini	Ithomisa	Ithomisa kinkelini	1	Eryngium	2	Eryngium agavifolium|Eryngium pandanifolium	1	Apiaceae	1	Apiales
Saturniidae	Saturniinae	Saturniini	Lemaireia	Lemaireia chrysopeplus									1	Liquidambar	1	Liquidambar sp.	1	Altingiaceae	1	Saxifragales
Saturniidae	Saturniinae	Saturniini	Lemaireia	Lemaireia loepoides									1	Quercus	1	Quercus sp.	1	Fagaceae	1	Fagales
Saturniidae	Saturniinae	Saturniini	Lemaireia	Lemaireia luteopeplus	3	Osmanthus|Hemiptelea|Ulmus	3	Osmanthus aquifolius|Hemiptelea davidii|Ulmus davidiana	2	Ulmaceae|Oleaceae	2	Rosales|Lamiales	3	Liquidambar|Quercus|Rhus	3	Liquidambar styraciflua|Quercus sp.|Rhus typhina	3	Altingiaceae|Fagaceae|Anacardiaceae	3	Saxifragales|Fagales|Sapindales
Saturniidae	Hemileucinae	Hemileucini	Leucanella	Leucanella acutissima									4	Ligustrum|Salix|Frangula|Malosma	4	Ligustrum vulgare|Salix sp.|Frangula alnus|Malosma laurina	4	Rhamnaceae|Oleaceae|Anacardiaceae|Salicaceae	4	Rosales|Lamiales|Sapindales|Malpighiales
Saturniidae	Hemileucinae	Hemileucini	Leucanella	Leucanella aspera	6	Tamarix|Acacia|Mimosa|Prosopis|Celtis|Schinopsis	12	Tamarix|Acacia|Acacia macracantha|Mimosa hexandra|Mimosa lorentzii|Prosopis|Prosopis affinis|Prosopis alba|Prosopis nigra|Celtis iguanaea|Celtis tala|Schinopsis quebracho-colorado	4	Fabaceae|Cannabaceae|Anacardiaceae|Tamaricaceae	4	Fabales|Rosales|Sapindales|Caryophyllales	5	Salix|Ligustrum|Laburnum|Robinia|Fagus	6	Salix caprea|Salix cinerea|Ligustrum|Laburnum anagyroides|Robinia pseudoacacia|Fagus sylvatica	4	Fagaceae|Fabaceae|Oleaceae|Salicaceae	4	Fagales|Fabales|Lamiales|Malpighiales
Saturniidae	Hemileucinae	Hemileucini	Leucanella	Leucanella contempta	2	Solanum|Prunus	2	Solanum sp.|Prunus capuli sp.	2	Rosaceae|Solanaceae	2	Rosales|Solanales	2	Ligustrum|Prunus	2	Ligustrum ovalifolium|Prunus domestica	2	Oleaceae|Rosaceae	2	Lamiales|Rosales
Saturniidae	Hemileucinae	Hemileucini	Leucanella	Leucanella gibbosus									1	Pteridium	1	Pteridium aquilinum	1	Dennstaedtiaceae	1	Polypodiales
Saturniidae	Hemileucinae	Hemileucini	Leucanella	Leucanella hosmera	10	Gonocalyx|Schwartzia|Ternstroemia|Trema|Saurauia|Weinmannia|Vaccinium|Hieronyma|Arachnothryx|Faramea	11	Gonocalyx pterocarpus|Schwartzia costaricensis|Ternstroemia tepezapote|Trema micrantha|Saurauia montana|Weinmannia pinnata|Weinmannia wercklei|Vaccinium poasanum|Hieronyma oblonga|Arachnothryx buddleioides|Faramea ovalis	8	Rubiaceae|Ericaceae|Phyllanthaceae|Actinidiaceae|Marcgraviaceae|Pentaphylacaceae|Cannabaceae|Cunoniaceae	5	Gentianales|Ericales|Malpighiales|Rosales|Oxalidales
Saturniidae	Hemileucinae	Hemileucini	Leucanella	Leucanella janeira	1	Rosa	1	Rosa sp.	1	Rosaceae	1	Rosales
Saturniidae	Hemileucinae	Hemileucini	Leucanella	Leucanella leucane	2	Ligustrum|Solanum	2	Ligustrum sp.|Solanum erianthum	2	Oleaceae|Solanaceae	2	Lamiales|Solanales	7	Syringa|Robinia|Betula|Malus|Prunus|Ligustrum|Salix	7	Syringa vulgaris|Robinia pseudoacacia|Betula|Malus pumila|Prunus domestica|Ligustrum vulgare|Salix caprea	5	Betulaceae|Oleaceae|Rosaceae|Fabaceae|Salicaceae	5	Fagales|Lamiales|Rosales|Fabales|Malpighiales
Saturniidae	Hemileucinae	Hemileucini	Leucanella	Leucanella maasseni									1	Ligustrum	1	Ligustrum vulgare	1	Oleaceae	1	Lamiales
Saturniidae	Hemileucinae	Hemileucini	Leucanella	Leucanella memusae	6	Artocarpus|Solanum|Styrax|Aspidosperma|Olea|Smilax	8	Artocarpus heterophyllus|Solanum melongena|Solanum lycocarpum|Styrax ferrugineus|Aspidosperma macrocarpon|Aspidosperma tomentosum|Olea europaea|Smilax campestris	6	Moraceae|Apocynaceae|Oleaceae|Smilacaceae|Solanaceae|Styracaceae	6	Rosales|Gentianales|Lamiales|Liliales|Solanales|Ericales	3	Salix|Ligustrum|Laburnum	6	Salix caprea|Salix cinerea|Ligustrum vulgare|Salix|Ligustrum ovalifolium|Laburnum anagyroides	3	Fabaceae|Oleaceae|Salicaceae	3	Fabales|Lamiales|Malpighiales
Saturniidae	Hemileucinae	Hemileucini	Leucanella	Leucanella nyctimene	1	Alnus	1	Alnus acuminata	1	Betulaceae	1	Fagales
Saturniidae	Hemileucinae	Hemileucini	Leucanella	Leucanella saturata	1	Platanus	1	Platanus lindeniana	1	Platanaceae	1	Proteales
Saturniidae	Hemileucinae	Hemileucini	Leucanella	Leucanella stuarti	7	Berberis|Senna|Adesmia|Anarthrophyllum|Lathyrus|Alnus|Schinus	11	Berberis flexuosa|Berberis flexuosa?|Senna birostris|Adesmia|Adesmia horrida|Anarthrophyllum elegans|Lathyrus macropus|Berberis ruscifolia|Lathyrus pubescens|Alnus jorullensis|Schinus polygamus	4	Fabaceae|Betulaceae|Berberidaceae|Anacardiaceae	4	Fabales|Fagales|Ranunculales|Sapindales
Saturniidae	Hemileucinae	Hemileucini	Leucanella	Leucanella viridescens	15	Lonicera|Erythrina|Cestrum|Cephalanthus|Olea|Solanum|Smilax|Melia|Ilex|Jacaranda|Emmotum|Acacia|Populus|Pyrus|Trema	23	Lonicera semenovii|Lonicera sempervirens|Erythrina crista-galli|Cestrum parqui|Lonicera caprifolium|Cephalanthus glabratus|Olea europaea|Solanum paniculatum|Smilax campestris|Melia azedarach|Ilex paraguariensis|Lonicera sp.|Jacaranda sp.|Solanum bonariense|Solanum tuberosum|Solanum variabile|Emmotum nitens|Acacia sp.|Erythrina sp.|Populus nigra|Pyrus communis|Trema micrantha|Lonicera japonica	13	Fabaceae|Rubiaceae|Solanaceae|Metteniusaceae|Aquifoliaceae|Bignoniaceae|Caprifoliaceae|Meliaceae|Oleaceae|Salicaceae|Rosaceae|Smilacaceae|Cannabaceae	11	Fabales|Gentianales|Solanales|Metteniusales|Aquifoliales|Lamiales|Dipsacales|Sapindales|Malpighiales|Rosales|Liliales	5	Ligustrum|Robinia|Morus|Prunus|Acer	8	Ligustrum japonicum|Ligustrum|Ligustrum vulgare|Robinia pseudoacacia|Morus alba|Prunus padus|Acer campestre|Acer pseudoplatanus	5	Sapindaceae|Oleaceae|Moraceae|Rosaceae|Fabaceae	4	Sapindales|Lamiales|Rosales|Fabales
Saturniidae	Saturniinae	Bunaeini	Leucopteryx	Leucopteryx ansorgei	1	Acacia	1	Acacia drepanolobium	1	Fabaceae	1	Fabales
Saturniidae	Saturniinae	Bunaeini	Lobobunaea		1	Brachystegia	1	Brachystegia spiciformis	1	Fabaceae	1	Fabales
Saturniidae	Saturniinae	Bunaeini	Lobobunaea	Lobobunaea acetes	1	Mangifera	1	Mangifera sp.	1	Anacardiaceae	1	Sapindales	2	Uapaca|Crataegus	2	Uapaca guineensis|Crataegus sp.	2	Rosaceae|Phyllanthaceae	2	Rosales|Malpighiales
Saturniidae	Saturniinae	Bunaeini	Lobobunaea	Lobobunaea lemairei	1	Pinus	1	Pinus sp.	1	Pinaceae	1	Pinales
Saturniidae	Saturniinae	Bunaeini	Lobobunaea	Lobobunaea phaedusa	11	Cinchona|Alchornea|Crossopteryx|Aframomum|Annona|Sapium|Musanga|Rosa|Eucalyptus|Psidium|Ozoroa	11	Cinchona sp.|Alchornea cordifolia|Crossopteryx febrifuga|Aframomum sp.|Annona senegalensis|Sapium ellipticum|Musanga cecropoides|Rosa sp.|Eucalyptus sp.|Psidium guajava|Ozoroa insignis	8	Zingiberaceae|Euphorbiaceae|Annonaceae|Rubiaceae|Myrtaceae|Urticaceae|Anacardiaceae|Rosaceae	7	Zingiberales|Malpighiales|Magnoliales|Gentianales|Myrtales|Rosales|Sapindales	3	Eucalyptus|Prunus|Sapium	3	Eucalyptus sp.|Prunus domestica|Sapium ellipticum	3	Myrtaceae|Rosaceae|Euphorbiaceae	3	Myrtales|Rosales|Malpighiales
Saturniidae	Saturniinae	Bunaeini	Lobobunaea	Lobobunaea saturnus	8	Acokanthera|Anisophyllea|Uapaca|Eugenia|Apodytes|Eucalyptus|Syzygium|Protorhus	9	Acokanthera|Anisophyllea laurina|Uapaca nitida|Eugenia|Apodytes dimidiata|Uapaca kirkiana|Eucalyptus|Syzygium cordatum|Protorhus longifolia	6	Apocynaceae|Anisophylleaceae|Metteniusaceae|Myrtaceae|Anacardiaceae|Phyllanthaceae	6	Gentianales|Cucurbitales|Metteniusales|Myrtales|Sapindales|Malpighiales
Saturniidae	Saturniinae	Saturniini	Loepa	Loepa diffundata									1	Parthenocissus	1	Parthenocissus sp.	1	Vitaceae	1	Vitales
Saturniidae	Saturniinae	Saturniini	Loepa	Loepa finnackermanni	1	Tetracera	1	Tetracera scandens	1	Dilleniaceae	1	Dilleniales	1	Ampelocissus	1	Ampelocissus martinii	1	Vitaceae	1	Vitales
Saturniidae	Saturniinae	Saturniini	Loepa	Loepa formosensis	6	Deutzia|Debregeasia|Ampelopsis|Tetrastigma|Lagerstroemia|Melastoma	6	Deutzia pulchra|Debregeasia orientalis|Ampelopsis brevipedunculata|Tetrastigma formosanum|Lagerstroemia subcostata|Melastoma candidum	5	Vitaceae|Urticaceae|Hydrangeaceae|Lythraceae|Melastomataceae	4	Vitales|Rosales|Cornales|Myrtales
Saturniidae	Saturniinae	Saturniini	Loepa	Loepa javanica	3	Leea|Cissus|Tetrastigma	5	Leea|Leea guineensis|Leea rubra|Cissus|Tetrastigma lanceolarium	1	Vitaceae	1	Vitales	1	Leea	1	Leea guineensis	1	Vitaceae	1	Vitales
Saturniidae	Saturniinae	Saturniini	Loepa	Loepa katinka	5	Impatiens|Polygonum|Parthenocissus|Dillenia|Leea	5	Impatiens|Polygonum|Parthenocissus|Dillenia pentagyna|Leea indica	4	Dilleniaceae|Balsaminaceae|Vitaceae|Polygonaceae	4	Dilleniales|Ericales|Vitales|Caryophyllales	4	Salix|Crataegus|Parthenocissus|Vitis	5	Salix babylonica|Crataegus|Parthenocissus tricuspidata|Vitis vinifera|Parthenocissus quinquefolia	3	Rosaceae|Vitaceae|Salicaceae	3	Rosales|Vitales|Malpighiales
Saturniidae	Saturniinae	Saturniini	Loepa	Loepa kuangtungensis	4	Hydrangea|Actinidia|Saurauia|Vitis	5	Hydrangea|Actinidia|Saurauia|Saurauia tristyla|Vitis	3	Actinidiaceae|Hydrangeaceae|Vitaceae	3	Ericales|Cornales|Vitales
Saturniidae	Saturniinae	Saturniini	Loepa	Loepa martinii									1	Parthenocissus	1	Parthenocissus sp.	1	Vitaceae	1	Vitales
Saturniidae	Saturniinae	Saturniini	Loepa	Loepa megacore									1	Parthenocissus	1	Parthenocissus tricuspidata	1	Vitaceae	1	Vitales
Saturniidae	Saturniinae	Saturniini	Loepa	Loepa miranda	1	Cissus	1	Cissus repens	1	Vitaceae	1	Vitales	1	Parthenocissus	1	Parthenocissus tricuspidata	1	Vitaceae	1	Vitales
Saturniidae	Saturniinae	Saturniini	Loepa	Loepa nigropupillata									1	Cissus	2	Cissus sp.|Cissus antarctica	1	Vitaceae	1	Vitales
Saturniidae	Saturniinae	Saturniini	Loepa	Loepa oberthuri	4	Fraxinus|Citrus|Ampelopsis|Vitis	5	Fraxinus mandshurica|Citrus|Citrus reticulata|Ampelopsis humulifolia|Vitis vinifera	3	Vitaceae|Rutaceae|Oleaceae	3	Vitales|Sapindales|Lamiales
Saturniidae	Saturniinae	Saturniini	Loepa	Loepa sakaei									2	Ampelopsis|Parthenocissus	2	Ampelopsis brevipedunculata|Parthenocissus tricuspidata	1	Vitaceae	1	Vitales
Saturniidae	Saturniinae	Saturniini	Loepa	Loepa siamensis									4	Leea|Tetrastigma|Parthenocissus|Prunus	4	Leea sp.|Tetrastigma sp.|Parthenocissus sp.|Prunus sp.	2	Vitaceae|Rosaceae	2	Vitales|Rosales
Saturniidae	Hemileucinae	Hemileucini	Lonomia		7	Desmopsis|Hirtella|Miconia|Tibouchina|Quassia|Cariniana|Astronium	7	Desmopsis bibracteata|Hirtella racemosa|Miconia|Tibouchina|Quassia|Cariniana estrellensis|Astronium gracile	6	Anacardiaceae|Lecythidaceae|Annonaceae|Chrysobalanaceae|Melastomataceae|Simaroubaceae	5	Sapindales|Ericales|Magnoliales|Malpighiales|Myrtales
Saturniidae	Hemileucinae	Hemileucini	Lonomia	Lonomia achelous	9	Aspidosperma|Phoebe|Rollinia|Erythrina|Machaerium|Pyrus|Tapirira|Cedrela|Hevea	9	Aspidosperma|Phoebe lanceolata|Rollinia emarginata|Erythrina crista-galli|Machaerium paraguariense|Pyrus communis|Tapirira guianensis|Cedrela fissilis|Hevea brasiliensis	8	Apocynaceae|Meliaceae|Fabaceae|Euphorbiaceae|Lauraceae|Rosaceae|Annonaceae|Anacardiaceae	7	Gentianales|Sapindales|Fabales|Malpighiales|Laurales|Rosales|Magnoliales	2	Schinus|Malosma	2	Schinus terebinthifolius|Malosma laurina	1	Anacardiaceae	1	Sapindales
Saturniidae	Hemileucinae	Hemileucini	Lonomia	Lonomia columbiana	8	Dendropanax|Tetragastris|Senna|Hampea|Carapa|Cedrela|Pseudolmedia|Hasseltia	8	Dendropanax arboreus|Tetragastris panamensis|Senna papillosa|Hampea appendiculata|Carapa guianensis|Cedrela odorata|Pseudolmedia mollis|Hasseltia floribunda	7	Meliaceae|Araliaceae|Malvaceae|Salicaceae|Moraceae|Fabaceae|Burseraceae	6	Sapindales|Apiales|Malvales|Malpighiales|Rosales|Fabales
Saturniidae	Hemileucinae	Hemileucini	Lonomia	Lonomia concordia	20	Mosquitoxylum|Geonoma|Clethra|Conceveiba|Croton|Gymnanthes|Hampea|Malvaviscus|Chionanthus|Parathesis|Prunus|Arachnothryx|Bertiera|Casearia|Hasseltia|Xylosma|Billia|Pouteria|Daphnopsis|Citharexylum	20	Mosquitoxylum jamaicense|Geonoma interrupta|Clethra lanata|Conceveiba pleiostemona|Croton schiedeanus|Gymnanthes riparia|Hampea appendiculata|Malvaviscus palmanus|Chionanthus panamensis|Parathesis glabra|Prunus annularis|Arachnothryx buddleioides|Bertiera bracteosa|Casearia tacanensis|Hasseltia floribunda|Xylosma chlorantha|Billia rosea|Pouteria exfoliata|Daphnopsis americana|Citharexylum costari…	14	Rubiaceae|Sapindaceae|Salicaceae|Oleaceae|Verbenaceae|Clethraceae|Euphorbiaceae|Thymelaeaceae|Arecaceae|Malvaceae|Anacardiaceae|Primulaceae|Sapotaceae|Rosaceae	8	Gentianales|Sapindales|Malpighiales|Lamiales|Ericales|Malvales|Arecales|Rosales
Saturniidae	Hemileucinae	Hemileucini	Lonomia	Lonomia electra	18	Clethra|Parathesis|Chrysophyllum|Pouteria|Coffea|Rondeletia|Citharexylum|Geonoma|Croton|Gymnanthes|Casearia|Xylosma|Hasseltia|Hampea|Malvaviscus|Psidium|Mosquitoxylum|Billia	18	Clethra sp.|Parathesis glabra|Chrysophyllum hirsutum|Pouteria exfoliata|Coffea arabica|Rondeletia buddleioides|Citharexylum costaricense|Geonoma interrupta|Croton schiedeanus|Gymnanthes riparia|Casearia tacanensis|Xylosma chlorantha|Hasseltia floribunda|Hampea appendiculata|Malvaviscus sp.|Psidium guajava|Mosquitoxylum jamaicense|Billia hippocastanum	12	Sapindaceae|Salicaceae|Sapotaceae|Verbenaceae|Clethraceae|Rubiaceae|Euphorbiaceae|Arecaceae|Malvaceae|Anacardiaceae|Primulaceae|Myrtaceae	8	Sapindales|Malpighiales|Ericales|Lamiales|Gentianales|Arecales|Malvales|Myrtales	7	Malosma|Rhus|Robinia|Carpinus|Fagus|Quercus|Ligustrum	7	Malosma laurina|Rhus|Robinia pseudoacacia|Carpinus betulus|Fagus sylvatica|Quercus ilex|Ligustrum ovalifolium	5	Betulaceae|Fagaceae|Oleaceae|Anacardiaceae|Fabaceae	4	Fagales|Lamiales|Sapindales|Fabales
Saturniidae	Hemileucinae	Hemileucini	Lonomia	Lonomia obliqua	5	Tabebuia|Rollinia|Ficus|Mespilus|Eucalyptus	5	Tabebuia pulcherrima|Rollinia emarginata|Ficus prinoides|Mespilus germanica|Eucalyptus	5	Myrtaceae|Moraceae|Rosaceae|Annonaceae|Bignoniaceae	4	Myrtales|Rosales|Magnoliales|Lamiales
Saturniidae	Hemileucinae	Hemileucini	Lonomia	Lonomia rufescens	4	Parathesis|Dendropanax|Senna|Hampea	5	Parathesis|Dendropanax arboreus|Senna papillosa|Hampea appendiculata|	4	Araliaceae|Malvaceae|Primulaceae|Fabaceae	4	Apiales|Malvales|Ericales|Fabales
Saturniidae	Hemileucinae	Hemileucini	Lonomia	Lonomia santarosensis	11	Dendropanax|Tabebuia|Tetragastris|Semialarium|Trichospermum|Carapa|Cedrela|Swietenia|Parathesis|Pentagonia|Quassia	11	Dendropanax arboreus|Tabebuia rosea|Tetragastris panamensis|Semialarium mexicanum|Trichospermum grewiifolium|Carapa guianensis|Cedrela odorata|Swietenia macrophylla|Parathesis trychogyne|Pentagonia donnell-smithii|Quassia amara	9	Meliaceae|Araliaceae|Primulaceae|Rubiaceae|Simaroubaceae|Celastraceae|Bignoniaceae|Burseraceae|Malvaceae	7	Sapindales|Apiales|Ericales|Gentianales|Celastrales|Lamiales|Malvales
Saturniidae	Hemileucinae	Hemileucini	Loxolomia	Loxolomia johnsoni	1	Cariniana	1	Cariniana legalis	1	Lecythidaceae	1	Ericales
Saturniidae	Saturniinae	Micragonini	Ludia	Ludia arguta	1	Vernonia	1	Vernonia sp.	1	Asteraceae	1	Asterales
Saturniidae	Saturniinae	Micragonini	Ludia	Ludia delegorguei	5	Microglossa|Senecio|Vernonia|Salvia|Uapaca	5	Microglossa mespilifolia|Senecio deltoideus|Vernonia|Salvia runcinata|Uapaca kirkiana	3	Asteraceae|Lamiaceae|Phyllanthaceae	3	Asterales|Lamiales|Malpighiales	2	Acacia|Robinia	2	Acacia sp.|Robinia pseudoacacia	1	Fabaceae	1	Fabales
Saturniidae	Saturniinae	Micragonini	Ludia	Ludia dentata	1	Vernonia	1	Vernonia sp.	1	Asteraceae	1	Asterales	2	Vernonia|Ocimum	2	Vernonia sp.|Ocimum sp.	2	Lamiaceae|Asteraceae	2	Lamiales|Asterales
Saturniidae	Saturniinae	Micragonini	Ludia	Ludia hansalii	1	Tarchonanthus	1	Tarchonanthus camphoratus	1	Asteraceae	1	Asterales
Saturniidae	Saturniinae	Micragonini	Ludia	Ludia orinoptena	10	Blumea|Bothriocline|Cynara|Gynura|Vernonia|Hoslundia|Plectranthus|Solenostemon|Tetradenia|Mikania	10	Blumea alata|Bothriocline longipes|Cynara sp.|Gynura sp.|Vernonia oligocephala|Hoslundia sp.|Plectranthus barbatus|Solenostemon scutellarioides|Tetradenia multiflora|Mikania sp.	2	Asteraceae|Lamiaceae	2	Asterales|Lamiales	3	Gynura|Lactuca|Ocimum	3	Gynura sp.|Lactuca sp.|Ocimum sp.	2	Asteraceae|Lamiaceae	2	Asterales|Lamiales
Saturniidae	Saturniinae	Urotini	Maltagorea	Maltagorea auricolor	1	Uapaca	1	Uapaca bojeri	1	Phyllanthaceae	1	Malpighiales
Saturniidae	Saturniinae	Urotini	Maltagorea	Maltagorea fusicolor	5	Uapaca|Agarista|Intsia|Terminalia|Mangifera	6	Uapaca bojeri|Agarista|Intsia|Uapaca|Terminalia catappa|Mangifera indica	5	Ericaceae|Fabaceae|Anacardiaceae|Combretaceae|Phyllanthaceae	5	Ericales|Fabales|Sapindales|Myrtales|Malpighiales
Saturniidae	Ceratocampinae		Megaceresa	Megaceresa pulchra									2	Anadenanthera|Calliandra	2	Anadenanthera peregrina|Calliandra parviflora	1	Fabaceae	1	Fabales
Saturniidae	Saturniinae	Bunaeini	Melanocera	Melanocera dargei	1	Ochna	2	Ochna arborea|Ochna natalitia	1	Ochnaceae	1	Malpighiales
Saturniidae	Saturniinae	Bunaeini	Melanocera	Melanocera menippe	5	Peltophorum|Acacia|Ochna|Ficus|Bauhinia	8	Peltophorum|Acacia mearnsii|Ochna arborea|Ochna atropurpurea|Ochna natalitia|Ochna serrulata|Ficus cordata|Bauhinia galpinii	3	Fabaceae|Moraceae|Ochnaceae	3	Fabales|Rosales|Malpighiales	9	Bauhinia|Calliandra|Dichrostachys|Quercus|Bridelia|Salix|Terminalia|Acer|Ozoroa	10	Bauhinia|Calliandra haematocephala|Dichrostachys cinerea|Quercus|Bridelia micrantha|Salix caprea|Salix cinerea|Terminalia sericea|Acer|Ozoroa obovata	7	Sapindaceae|Fabaceae|Phyllanthaceae|Anacardiaceae|Fagaceae|Salicaceae|Combretaceae	5	Sapindales|Fabales|Malpighiales|Fagales|Myrtales
Saturniidae	Saturniinae	Bunaeini	Melanocera	Melanocera parva	1	Ochna	1	Ochna schweinfurthiana	1	Ochnaceae	1	Malpighiales
Saturniidae	Saturniinae	Bunaeini	Melanocera	Melanocera sufferti	1	Ochna	1	Ochna sp.	1	Ochnaceae	1	Malpighiales
Saturniidae	Saturniinae	Bunaeini	Meroleuca	Meroleuca dargei	1	Pennisetum	1	Pennisetum clandestinum	1	Poaceae	1	Poales
Saturniidae	Saturniinae	Micragonini	Micragone		1	Allophylus	1	Allophylus africanus	1	Sapindaceae	1	Sapindales
Saturniidae	Saturniinae	Micragonini	Micragone	Micragone ansorgei	3	Cercis|Julbernardia|Brachystegia	4	Cercis|Julbernardia globiflora|Brachystegia spiciformis|Julbernardia paniculata	1	Fabaceae	1	Fabales
Saturniidae	Cercophaninae	Cercophanini	Microdulia	Microdulia mirabilis	1	Nothofagus	1	Nothofagus obliqua	1	Nothofagaceae	1	Fagales
Saturniidae	Hemileucinae	Hemileucini	Molippa	Molippa binasa	1	Schinus	1	Schinus molle	1	Anacardiaceae	1	Sapindales
Saturniidae	Hemileucinae	Hemileucini	Molippa	Molippa nibasa	11	Amphilophium|Arrabidaea|Bauhinia|Cassia|Senna|Enterolobium|Ateleia|Gliricidia|Lonchocarpus|Dalbergia|Lysiloma	13	Amphilophium paniculatum|Arrabidaea molissima|Arrabidaea patellifera|Bauhinia ungulata|Cassia grandis|Senna pallida|Enterolobium cyclocarpum|Ateleia herbert-smithii|Gliricidia sepium|Lonchocarpus minimiflorus|Arrabidaea mollissima|Dalbergia retusa|Lysiloma divaricatum	2	Bignoniaceae|Fabaceae	2	Lamiales|Fabales	1	Acacia	1	Acacia baileyana	1	Fabaceae	1	Fabales
Saturniidae	Hemileucinae	Hemileucini	Molippa	Molippa rosea									2	Platanus|Robinia	2	Platanus sp.|Robinia pseudoacacia	2	Platanaceae|Fabaceae	2	Proteales|Fabales
Saturniidae	Hemileucinae	Hemileucini	Molippa	Molippa sabina	10	Bauhinia|Caesalpinia|Acacia|Mimosa|Erythrina|Robinia|Punica|Psidium|Serjania|Senna	12	Bauhinia|Bauhinia forficata|Caesalpinia pluviosa|Acacia|Acacia decurrens|Mimosa|Erythrina|Robinia pseudoacacia|Punica granatum|Psidium guajava|Serjania|Senna occidentalis	4	Fabaceae|Myrtaceae|Lythraceae|Sapindaceae	3	Fabales|Myrtales|Sapindales	4	Bauhinia|Laburnum|Robinia|Tilia	4	Bauhinia forficata|Laburnum anagyroides|Robinia pseudoacacia|Tilia sp.	2	Fabaceae|Malvaceae	2	Fabales|Malvales
Saturniidae	Hemileucinae	Hemileucini	Molippa	Molippa simillima	6	Spathodea|Mimosa|Morus|Bauhinia|Erythrina|Trema	6	Spathodea campanulata|Mimosa|Morus alba|Bauhinia forficata|Erythrina falcata|Trema micrantha	4	Fabaceae|Moraceae|Bignoniaceae|Cannabaceae	3	Fabales|Rosales|Lamiales
Saturniidae	Hemileucinae	Hemileucini	Molippa	Molippa tusina	9	Senna|Inga|Dioclea|Pterocarpus|Hasseltia|Hampea|Croton|Lonchocarpus|Pleuranthodendron	10	Senna papillosa|Inga oerstediana|Dioclea malacocarpa|Pterocarpus rohrii|Hasseltia floribunda|Hampea appendiculata|Croton billbergianus|Lonchocarpus ferrugineus|Lonchocarpus heptaphyllus|Pleuranthodendron lindenii	4	Euphorbiaceae|Fabaceae|Malvaceae|Salicaceae	3	Malpighiales|Fabales|Malvales
Saturniidae	Cercophaninae	Cercophanini	Neocercophana	Neocercophana philippii	1	Hydrangea	1	Hydrangea scandens	1	Hydrangeaceae	1	Cornales
Saturniidae	Saturniinae	Saturniini	Neodiphthera	Neodiphthera excavus	1	Erythrophleum	1	Erythrophleum chlorostachys	1	Fabaceae	1	Fabales
Saturniidae	Saturniinae	Saturniini	Neodiphthera	Neodiphthera joiceyi	1	Alstonia	1	Alstonia brassii	1	Apocynaceae	1	Gentianales
Saturniidae	Saturniinae	Saturniini	Neodiphthera	Neodiphthera rhythmica	1	Litsea	1	Litsea reticulata	1	Lauraceae	1	Laurales	1	Doryphora	1	Doryphora sassafras	1	Atherospermataceae	1	Laurales
Saturniidae	Ceratocampinae		Neorcarnegia	Neorcarnegia basirei	3	Caesalpinia|Cassia|Machaerium	3	Caesalpinia ferrea|Cassia sp.|Machaerium acutifolium	1	Fabaceae	1	Fabales	2	Acacia|Salix	2	Acacia baileyana|Salix pentandra	2	Fabaceae|Salicaceae	2	Fabales|Malpighiales
Saturniidae	Saturniinae	Saturniini	Neoris	Neoris galeropa	2	Crataegus|Ulmus	2	Crataegus sp.|Ulmus sp.	2	Rosaceae|Ulmaceae	1	Rosales
Saturniidae	Saturniinae	Saturniini	Neoris	Neoris huttoni	2	Pyrus|Malus	2	Pyrus pashia|Malus sp.	1	Rosaceae	1	Rosales
Saturniidae	Saturniinae	Saturniini	Neoris	Neoris naessigi	5	Crataegus|Malus|Prunus|Acer|Pistacia	5	Crataegus|Malus|Prunus|Acer|Pistacia	3	Sapindaceae|Rosaceae|Anacardiaceae	2	Sapindales|Rosales
Saturniidae	Saturniinae	Saturniini	Neoris	Neoris naumanni	1	Betula	1	Betula sp.	1	Betulaceae	1	Fagales
Saturniidae	Saturniinae	Saturniini	Neoris	Neoris shadulla	17	Salix|Prunus|Ulmus|Pistacia|Lonicera|Fraxinus|Quercus|Cotoneaster|Crataegus|Cydonia|Malus|Pyrus|Rosa|Celtis|Zygophyllum|Acer|Pinus	34	Salix|Prunus dulcis|Ulmus|Pistacia vera|Lonicera korolkowii|Lonicera nummulariifolia|Fraxinus americana|Fraxinus sogdiana|Quercus robur|Cotoneaster hissaricus|Cotoneaster insignis|Cotoneaster suavis|Crataegus monogyna|Crataegus turkestanica|Cydonia oblonga|Malus domestica|Malus sieversii|Prunus armeniaca|Prunus bucharica|Prunus cerasifera|Prunus domestica|Prunus persica|Prunus prostrata|Prunus sp…	11	Sapindaceae|Cannabaceae|Rosaceae|Oleaceae|Caprifoliaceae|Pinaceae|Anacardiaceae|Fagaceae|Salicaceae|Ulmaceae|Zygophyllaceae	8	Sapindales|Rosales|Lamiales|Dipsacales|Pinales|Fagales|Malpighiales|Zygophyllales
Saturniidae	Ceratocampinae		Oiticella	Oiticella brevis	1	Mimosa	1	Mimosa sp.	1	Fabaceae	1	Fabales
Saturniidae	Saturniinae		Opodiphthera	Opodiphthera astrophela	6	Alstonia|Callicoma|Elaeocarpus|Alphitonia|Flindersia|Nageia	8	Alstonia constricta|Callicoma serratifolia|Elaeocarpus obovatus|Alphitonia excelsa|Flindersia australis|Flindersia maculosa|Flindersia schottiana|Nageia elata	6	Rhamnaceae|Apocynaceae|Cunoniaceae|Elaeocarpaceae|Rutaceae|Podocarpaceae	5	Rosales|Gentianales|Oxalidales|Sapindales|Araucariales
Saturniidae	Saturniinae		Opodiphthera	Opodiphthera fervida	2	Maesa|Rapanea	2	Maesa muelleri|Rapanea porosa	1	Primulaceae	1	Ericales	2	Maesa|Rapanea	2	Maesa muelleri|Rapanea porosa	1	Primulaceae	1	Ericales
Saturniidae	Hemileucinae	Hemileucini	Ormiscodes		1	Nothofagus	1	Nothofagus macrocarpa	1	Nothofagaceae	1	Fagales
Saturniidae	Hemileucinae	Hemileucini	Ormiscodes	Ormiscodes amphinome	3	Populus|Salix|Pinus	4	Populus|Salix|Salix babylonica|Pinus	2	Pinaceae|Salicaceae	2	Pinales|Malpighiales
Saturniidae	Hemileucinae	Hemileucini	Ormiscodes	Ormiscodes cinnamomea	4	Juglans|Populus|Salix|Pinus	4	Juglans regia|Populus|Salix|Pinus	3	Juglandaceae|Pinaceae|Salicaceae	3	Fagales|Pinales|Malpighiales	4	Capsicum|Populus|Rosa|Muehlenbeckia	4	Capsicum sp.|Populus sp.|Rosa sp.|Muehlenbeckia sagittifolia	4	Solanaceae|Polygonaceae|Salicaceae|Rosaceae	4	Solanales|Caryophyllales|Malpighiales|Rosales
Saturniidae	Hemileucinae	Hemileucini	Ormiscodes	Ormiscodes cognata									1	Quercus	1	Quercus robur	1	Fagaceae	1	Fagales
Saturniidae	Hemileucinae	Hemileucini	Ormiscodes	Ormiscodes rufosignata	1	Pinus	1	Pinus sp.	1	Pinaceae	1	Pinales	4	Juglans|Populus|Salix|Prunus	4	Juglans sp.|Populus sp.|Salix sp.|Prunus sp.	3	Juglandaceae|Salicaceae|Rosaceae	3	Fagales|Malpighiales|Rosales
Saturniidae	Hemileucinae	Hemileucini	Ormiscodes	Ormiscodes socialis	2	Cryptocarya|Ribes	2	Cryptocarya peumus|Ribes divaricatum	2	Lauraceae|Grossulariaceae	2	Laurales|Saxifragales
Saturniidae	Ceratocampinae		Othorene	Othorene bernardoespinozai	1	Quercus	1	Quercus oleoides	1	Fagaceae	1	Fagales
Saturniidae	Ceratocampinae		Othorene	Othorene hodeva	2	Sclerolobium|Caryocar	3	Sclerolobium aureum|Sclerolobium paniculatum|Caryocar brasiliense	2	Caryocaraceae|Fabaceae	2	Malpighiales|Fabales	3	Acacia|Quercus|Gleditsia	3	Acacia baileyana|Quercus virginiana|Gleditsia triacanthos	2	Fabaceae|Fagaceae	2	Fabales|Fagales
Saturniidae	Ceratocampinae		Othorene	Othorene intermedia	3	Chrysophyllum|Manilkara|Pouteria	3	Chrysophyllum brenesii|Manilkara chicle|Pouteria exfoliata	1	Sapotaceae	1	Ericales
Saturniidae	Ceratocampinae		Othorene	Othorene purpurascens	4	Manilkara|Pouteria|Terminalia|Psidium	4	Manilkara chicle|Pouteria exfoliata|Terminalia catappa|Psidium	3	Sapotaceae|Myrtaceae|Combretaceae	2	Ericales|Myrtales	1	Chrysophyllum	1	Chrysophyllum brenesii	1	Sapotaceae	1	Ericales
Saturniidae	Ceratocampinae		Othorene	Othorene verana	1	Quercus	1	Quercus oleoides	1	Fagaceae	1	Fagales	1	Quercus	1	Quercus gambelii	1	Fagaceae	1	Fagales
Saturniidae	Oxyteninae		Oxytenis		3	Genipa|Posoqueria|Warszewiczia	3	Genipa americana|Posoqueria latifolia|Warszewiczia coccinea	1	Rubiaceae	1	Gentianales
Saturniidae	Oxyteninae		Oxytenis	Oxytenis albilunulata	3	Dystovomita|Cavendishia|Satyria	3	Dystovomita paniculata|Cavendishia axillaris|Satyria panurensis	2	Ericaceae|Clusiaceae	2	Ericales|Malpighiales
Saturniidae	Oxyteninae		Oxytenis	Oxytenis beprea	12	Alibertia|Augusta|Bertiera|Chimarrhis|Genipa|Gonzalagunia|Ixora|Morinda|Pentagonia|Posoqueria|Psychotria|Randia	18	Alibertia edulis|Augusta rivalis|Bertiera bracteosa|Chimarrhis parviflora|Genipa americana|Gonzalagunia bracteosa|Ixora floribunda|Morinda panamensis|Pentagonia donnell-smithii|Posoqueria latifolia|Psychotria grandis|Randia aculeata|Randia armata|Randia genipoides|Randia grandifolia|Randia loniceroides|Randia monantha|Randia pittieri	1	Rubiaceae	1	Gentianales
Saturniidae	Oxyteninae		Oxytenis	Oxytenis gigantea	1	Calatola	1	Calatola costaricensis	1	Metteniusaceae	1	Metteniusales
Saturniidae	Oxyteninae		Oxytenis	Oxytenis modestia	3	Alibertia|Genipa|Tocoyena	4	Alibertia concolor|Alibertia edulis|Genipa americana|Tocoyena formosa	1	Rubiaceae	1	Gentianales	1	Alibertia	1	Alibertia edulis	1	Rubiaceae	1	Gentianales
Saturniidae	Oxyteninae		Oxytenis	Oxytenis modoccidentalis	6	Alibertia|Amaioua|Augusta|Genipa|Posoqueria|Randia	6	Alibertia edulis|Amaioua pedicellata|Augusta rivalis|Genipa americana|Posoqueria latifolia|Randia monantha	1	Rubiaceae	1	Gentianales
Saturniidae	Oxyteninae		Oxytenis	Oxytenis naemia	5	Isertia|Chimarrhis|Chomelia|Sabicea|Uncaria	7	Isertia haenkeana|Chimarrhis parviflora|Chomelia microloba|Isertia laevis|Sabicea panamensis|Sabicea villosa|Uncaria tomentosa	1	Rubiaceae	1	Gentianales
Saturniidae	Oxyteninae		Oxytenis	Oxytenis nubila	6	Arachnothryx|Chimarrhis|Chomelia|Cosmibuena|Randia|Sabicea	7	Arachnothryx buddleioides|Chimarrhis parviflora|Chomelia microloba|Cosmibuena grandiflora|Cosmibuena macrocarpa|Randia grandifolia|Sabicea villosa	1	Rubiaceae	1	Gentianales
Saturniidae	Oxyteninae		Oxytenis	Oxytenis paraguayensis	1	Calycophyllum	1	Calycophyllum multiflorum	1	Rubiaceae	1	Gentianales
Saturniidae	Oxyteninae		Oxytenis	Oxytenis zerbina	1	Randia	1	Randia formosa	1	Rubiaceae	1	Gentianales
Saturniidae	Arsenurinae	Arsenurini	Paradaemonia	Paradaemonia platydesmia	2	Bombax|Chorisia	2	Bombax sp.|Chorisia sp.	1	Malvaceae	1	Malvales
Saturniidae	Arsenurinae	Arsenurini	Paradaemonia	Paradaemonia thelia	1	Chrysophyllum	1	Chrysophyllum marginatum	1	Sapotaceae	1	Ericales
Saturniidae	Hemileucinae	Hemileucini	Paradirphia	Paradirphia boudinoti									3	Robinia|Malus|Prunus	3	Robinia pseudoacacia|Malus sp.|Prunus sp.	2	Rosaceae|Fabaceae	2	Rosales|Fabales
Saturniidae	Hemileucinae	Hemileucini	Paradirphia	Paradirphia semirosea									1	Robinia	1	Robinia pseudoacacia	1	Fabaceae	1	Fabales
Saturniidae	Hemileucinae	Hemileucini	Paradirphia	Paradirphia valverdei									1	Prunus	1	Prunus sp.	1	Rosaceae	1	Rosales
Saturniidae	Hemileucinae	Hemileucini	Paradirphia	Paradirphia winifredae	5	Weinmannia|Gonocalyx|Vaccinium|Blakea|Miconia	7	Weinmannia pinnata|Weinmannia wercklei|Gonocalyx pterocarpus|Vaccinium poasanum|Blakea chlorantha|Miconia lonchophylla|Miconia tonduzii	3	Melastomataceae|Ericaceae|Cunoniaceae	3	Myrtales|Ericales|Oxalidales
Saturniidae	Hemileucinae	Hemileucini	Periga	Periga circumstans	6	Coffea|Eriobotrya|Diospyros|Ilex|Psidium|Tabebuia	6	Coffea arabica|Eriobotrya japonica|Diospyros khaki|Ilex paraguariensis|Psidium guayava|Tabebuia heptaphylla	6	Rubiaceae|Ebenaceae|Rosaceae|Aquifoliaceae|Myrtaceae|Bignoniaceae	6	Gentianales|Ericales|Rosales|Aquifoliales|Myrtales|Lamiales
Saturniidae	Hemileucinae	Hemileucini	Periga	Periga cluacina	1	Coffea	1	Coffea sp.	1	Rubiaceae	1	Gentianales
Saturniidae	Hemileucinae	Hemileucini	Periga	Periga costaricana	3	Carapa|Pseudolmedia|Heisteria	3	Carapa guianensis|Pseudolmedia mollis|Heisteria scandens	3	Meliaceae|Erythropalaceae|Moraceae	3	Sapindales|Santalales|Rosales
Saturniidae	Hemileucinae	Hemileucini	Periga	Periga cynira	3	Urera|Urtica|Lithraea	4	Urera baccifera|Urera caracasana|Urtica urens|Lithraea brasiliensis	2	Anacardiaceae|Urticaceae	2	Sapindales|Rosales
Saturniidae	Hemileucinae	Hemileucini	Periga	Periga falcata	2	Diospyros|Joannesia	2	Diospyros kaki|Joannesia princeps	2	Ebenaceae|Euphorbiaceae	2	Ericales|Malpighiales
Saturniidae	Hemileucinae	Hemileucini	Periga	Periga parvibulbacea									2	Prunus|Malosma	2	Prunus capuli|Malosma laurina	2	Anacardiaceae|Rosaceae	2	Sapindales|Rosales
Saturniidae	Hemileucinae	Hemileucini	Periphoba	Periphoba arcaei	117	Acacia|Acalypha|Alchornea|Alibertia|Anacardium|Andira|Annona|Aphelandra|Ardisia|Astronium|Augusta|Bursera|Byrsonima|Calophyllum|Calycophyllum|Calyptranthes|Calyptrogyne|Carapa|Casearia|Cassia|Ceiba|Cespedesia|Chrysobalanus|Chrysophyllum|Cnestidium|Combretum|Conceveiba|Conostegia|Costus|Coussapoa|Croton|Cupania|Cydista|Davilla|Dilodendron|Dioclea|Erythrina|Eugenia|Ficus|Garcinia|Geonoma|Gouania|Gu…	150	Acacia collinsii|Acalypha diversifolia|Alchornea latifolia|Alibertia edulis|Anacardium excelsum|Anacardium occidentale|Andira inermis|Annona purpurea|Annona rensoniana|Aphelandra scabra|Ardisia compressa|Ardisia revoluta|Ardisia standleyana|Astronium graveolens|Augusta rivalis|Bursera simaruba|Byrsonima crassifolia|Calophyllum brasiliense|Calycophyllum candidissimum|Calyptranthes guanacastensis|C…	47	Acanthaceae|Anacardiaceae|Annonaceae|Arecaceae|Asteraceae|Bignoniaceae|Burseraceae|Calophyllaceae|Cannabaceae|Celastraceae|Chrysobalanaceae|Clusiaceae|Combretaceae|Connaraceae|Costaceae|Dilleniaceae|Elaeocarpaceae|Euphorbiaceae|Fabaceae|Fagaceae|Hamamelidaceae|Hypericaceae|Lacistemataceae|Lauraceae|Lythraceae|Malpighiaceae|Malvaceae|Melastomataceae|Meliaceae|Moraceae|Myristicaceae|Myrtaceae|Ochna…	21	Arecales|Asterales|Caryophyllales|Celastrales|Dilleniales|Ericales|Fabales|Fagales|Gentianales|Lamiales|Laurales|Magnoliales|Malpighiales|Malvales|Myrtales|Oxalidales|Piperales|Rosales|Sapindales|Saxifragales|Zingiberales	1	Schinus	1	Schinus terebinthifolius	1	Anacardiaceae	1	Sapindales
Saturniidae	Hemileucinae	Hemileucini	Periphoba	Periphoba hircia	13	Diospyros|Myrsine|Alibertia|Elaeis|Ocotea|Virola|Acacia|Byrsonima|Eucalyptus|Qualea|Anacardium|Simarouba|Mangifera	13	Diospyros sericea|Myrsine guianensis|Alibertia edulis|Elaeis guineensis|Ocotea spixiana|Virola sebifera|Acacia mangium|Byrsonima verbascifolia|Eucalyptus urophylla|Qualea multiflora|Anacardium humile|Simarouba amara|Mangifera indica	12	Fabaceae|Rubiaceae|Anacardiaceae|Malpighiaceae|Ebenaceae|Arecaceae|Myrtaceae|Primulaceae|Lauraceae|Vochysiaceae|Simaroubaceae|Myristicaceae	9	Fabales|Gentianales|Sapindales|Malpighiales|Ericales|Arecales|Myrtales|Laurales|Magnoliales	10	Robinia|Carpinus|Fagus|Quercus|Populus|Crataegus|Malus|Prunus|Rosa|Salix	11	Robinia pseudoacacia|Carpinus betulus|Fagus sylvatica|Quercus|Quercus ilex|Populus nigra|Crataegus monogyna|Malus|Prunus|Rosa|Salix babylonica	5	Betulaceae|Rosaceae|Fagaceae|Salicaceae|Fabaceae	4	Fagales|Rosales|Malpighiales|Fabales
Saturniidae	Hemileucinae	Hemileucini	Periphoba	Periphoba porioni									1	Malosma	1	Malosma laurina	1	Anacardiaceae	1	Sapindales
Saturniidae	Hemileucinae	Hemileucini	Periphoba	Periphoba tephra	1	Eucalyptus	1	Eucalyptus sp.	1	Myrtaceae	1	Myrtales
Saturniidae	Saturniinae	Saturniini	Perisomena	Perisomena caecigena	10	Fraxinus|Quercus|Salix|Crataegus|Prunus|Rosa|Ulmus|Acer|Carpinus|Populus	21	Fraxinus|Quercus|Quercus cerris|Quercus coccifera|Quercus ilex|Quercus petraea|Quercus pubescens|Quercus robur|Salix|Crataegus|Prunus|Prunus domestica|Prunus spinosa|Rosa|Ulmus|Acer campestre|Carpinus betulus|Quercus brantii|Quercus libani|Populus alba|Populus nigra	7	Sapindaceae|Betulaceae|Rosaceae|Oleaceae|Salicaceae|Fagaceae|Ulmaceae	5	Sapindales|Fagales|Rosales|Lamiales|Malpighiales	3	Quercus|Populus|Pyrus	5	Quercus cerris|Quercus nigra|Quercus robur|Populus x canadensis|Pyrus communis	3	Salicaceae|Rosaceae|Fagaceae	3	Malpighiales|Rosales|Fagales
Saturniidae	Hemileucinae	Polythysanini	Polythysana	Polythysana apollina	1	Cryptocarya	1	Cryptocarya rubra	1	Lauraceae	1	Laurales	3	Liquidambar|Persea|Maytenus	3	Liquidambar sp.|Persea americana|Maytenus boaria	3	Altingiaceae|Celastraceae|Lauraceae	3	Saxifragales|Celastrales|Laurales
Saturniidae	Hemileucinae	Polythysanini	Polythysana	Polythysana cinerascens	3	Cryptocarya|Rosa|Myoschilos	3	Cryptocarya peumus|Rosa sp.|Myoschilos oblungum	3	Lauraceae|Santalaceae|Rosaceae	3	Laurales|Santalales|Rosales	7	Cryptocarya|Lindera|Persea|Maytenus|Gleditsia|Rhus|Schinus	7	Cryptocarya rubra|Lindera|Persea americana|Maytenus boaria|Gleditsia|Rhus|Schinus molle	4	Lauraceae|Fabaceae|Celastraceae|Anacardiaceae	4	Laurales|Fabales|Celastrales|Sapindales
Saturniidae	Hemileucinae	Polythysanini	Polythysana	Polythysana rubrescens									2	Cryptocarya|Maytenus	2	Cryptocarya rubra|Maytenus boaria	2	Lauraceae|Celastraceae	2	Laurales|Celastrales
Saturniidae	Ceratocampinae		Procitheronia	Procitheronia principalis	1	Croton	3	Croton sp.|Croton floribunda|Croton urucurana	1	Euphorbiaceae	1	Malpighiales
Saturniidae	Saturniinae	Urotini	Pselaphelia	Pselaphelia flavivitta	2	Aframomum|Trichilia	4	Aframomum|Trichilia dregeana|Trichilia emetica|Trichilia lineata	2	Zingiberaceae|Meliaceae	2	Zingiberales|Sapindales
Saturniidae	Saturniinae	Urotini	Pselaphelia	Pselaphelia gemmifera	1	Aframomum	1	Aframomum sp.	1	Zingiberaceae	1	Zingiberales
Saturniidae	Saturniinae	Urotini	Pseudantheraea	Pseudantheraea discrepans	3	Poga|Uapaca|Mangifera	3	Poga oleosa|Uapaca guineensis|Mangifera indica	3	Anacardiaceae|Anisophylleaceae|Phyllanthaceae	3	Sapindales|Cucurbitales|Malpighiales	3	Fagus|Salix|Terminalia	4	Fagus sylvatica|Salix sp.|Salix caprea|Terminalia sp.	3	Fagaceae|Salicaceae|Combretaceae	3	Fagales|Malpighiales|Myrtales
Saturniidae	Saturniinae	Urotini	Pseudaphelia	Pseudaphelia apollinaris	1	Turraea	5	Turraea|Turraea floribunda|Turraea heterophylla|Turraea nilotica|Turraea zambesica	1	Meliaceae	1	Sapindales
Saturniidae	Hemileucinae	Hemileucini	Pseudautomeris	Pseudautomeris brasiliensis	16	Styrax|Emmotum|Roupala|Ouratea|Aspidosperma|Cordia|Cyrtopodium|Bambusa|Pterogyne|Senna|Ricinus|Ficus|Sageretia|Rosa|Celtis|Trema	16	Styrax ferrugineus|Emmotum nitens|Roupala montana|Ouratea hexasperma|Aspidosperma parvifolium|Cordia sp.|Cyrtopodium sp.|Bambusa sp.|Pterogyne sp.|Senna bicapsularis|Ricinus communis|Ficus benjamina|Sageretia sp.|Rosa sp.|Celtis sp.|Trema micrantha	14	Apocynaceae|Poaceae|Cannabaceae|Boraginaceae|Orchidaceae|Metteniusaceae|Moraceae|Ochnaceae|Fabaceae|Euphorbiaceae|Rosaceae|Proteaceae|Rhamnaceae|Styracaceae	10	Gentianales|Poales|Rosales|Boraginales|Asparagales|Metteniusales|Malpighiales|Fabales|Proteales|Ericales	2	Ligustrum|Quercus	2	Ligustrum ovalifolium|Quercus robur	2	Oleaceae|Fagaceae	2	Lamiales|Fagales
Saturniidae	Hemileucinae	Hemileucini	Pseudautomeris	Pseudautomeris erubescens	4	Coffea|Erythrina|Wisteria|Carpotroche	4	Coffea|Erythrina poepiggiana|Wisteria sinensis|Carpotroche brasiliensis	3	Achariaceae|Rubiaceae|Fabaceae	3	Malpighiales|Gentianales|Fabales
Saturniidae	Hemileucinae	Hemileucini	Pseudautomeris	Pseudautomeris grammivora	1	Hemarthria	1	Hemarthria altissima	1	Poaceae	1	Poales
Saturniidae	Hemileucinae	Hemileucini	Pseudautomeris	Pseudautomeris hubneri	3	Senna|Crotalaria|Ricinus	3	Senna corymbosa|Crotalaria sp.|Ricinus communis	2	Fabaceae|Euphorbiaceae	2	Fabales|Malpighiales
Saturniidae	Hemileucinae	Hemileucini	Pseudautomeris	Pseudautomeris irene	4	Saccharum|Erythrina|Punica|Prestoea	4	Saccharum officinarum|Erythrina poepiggiana|Punica granatum|Prestoea decurrens	4	Fabaceae|Arecaceae|Lythraceae|Poaceae	4	Fabales|Arecales|Myrtales|Poales	3	Malus|Prunus|Rosa	3	Malus domestica|Prunus domestica|Rosa sp.	1	Rosaceae	1	Rosales
Saturniidae	Hemileucinae	Hemileucini	Pseudautomeris	Pseudautomeris latus	2	Emmotum|Roupala	2	Emmotum nitens|Roupala montana	2	Metteniusaceae|Proteaceae	2	Metteniusales|Proteales	2	Ligustrum|Robinia	2	Ligustrum ovalifolium|Robinia pseudoacacia	2	Oleaceae|Fabaceae	2	Lamiales|Fabales
Saturniidae	Hemileucinae	Hemileucini	Pseudautomeris	Pseudautomeris luteata	2	Alibertia|Emmotum	2	Alibertia edulis|Emmotum nitens	2	Rubiaceae|Metteniusaceae	2	Gentianales|Metteniusales
Saturniidae	Hemileucinae	Hemileucini	Pseudautomeris	Pseudautomeris ophthalmica	1	Iris	1	Iris sp.	1	Iridaceae	1	Asparagales
Saturniidae	Hemileucinae	Hemileucini	Pseudautomeris	Pseudautomeris salmonea	3	Solanum|Punica|Citrus	3	Solanum sp.|Punica granatum|Citrus medica	3	Rutaceae|Lythraceae|Solanaceae	3	Sapindales|Myrtales|Solanales	1	Schinus	1	Schinus terebinthifolius	1	Anacardiaceae	1	Sapindales
Saturniidae	Saturniinae	Bunaeini	Pseudimbrasia	Pseudimbrasia deyrollei	3	Tamarindus|Acacia|Sapium	3	Tamarindus indica|Acacia mearnsii|Sapium ellipticum	2	Fabaceae|Euphorbiaceae	2	Fabales|Malpighiales	2	Erythrophleum|Quercus	2	Erythrophleum suaveolens|Quercus	2	Fabaceae|Fagaceae	2	Fabales|Fagales
Saturniidae	Saturniinae	Bunaeini	Pseudobunaea		1	Trema	1	Trema orientalis	1	Cannabaceae	1	Rosales
Saturniidae	Saturniinae	Bunaeini	Pseudobunaea	Pseudobunaea alinda									1	Fagus	1	Fagus sylvatica	1	Fagaceae	1	Fagales
Saturniidae	Saturniinae	Bunaeini	Pseudobunaea	Pseudobunaea callista	2	Brachystegia|Julbernardia	2	Brachystegia sp.|Julbernardia sp.	1	Fabaceae	1	Fabales
Saturniidae	Saturniinae	Bunaeini	Pseudobunaea	Pseudobunaea cleopatra	3	Alchornea|Croton|Bridelia	3	Alchornea cordifolia|Croton oligandrus|Bridelia grandis	2	Euphorbiaceae|Phyllanthaceae	1	Malpighiales
Saturniidae	Saturniinae	Bunaeini	Pseudobunaea	Pseudobunaea illustris									1	Rosa	1	Rosa sp.	1	Rosaceae	1	Rosales
Saturniidae	Saturniinae	Bunaeini	Pseudobunaea	Pseudobunaea irius	21	Bauhinia|Erythrina|Celtis|Bersama|Eucalyptus|Sclerocarya|Pinus|Diospyros|Chrysophyllum|Annona|Maytenus|Brachystegia|Julbernardia|Acacia|Pterocarpus|Quercus|Uapaca|Populus|Prunus|Deinbollia|Cupressus	33	Bauhinia thonningii|Erythrina caffra|Erythrina lysistemon|Celtis durandii|Bersama lucens|Eucalyptus fastigiata|Eucalyptus macarthurii|Eucalyptus nitens|Sclerocarya birrea|Pinus caribaea|Pinus pseudostrobus|Diospyros whyteana|Chrysophyllum viridifolium|Annona senegalensis|Maytenus|Bauhinia reticulata|Brachystegia spiciformis|Julbernardia globiflora|Julbernardia paniculata|Acacia mearnsii|Pterocarp…	16	Fabaceae|Annonaceae|Francoaceae|Cannabaceae|Sapotaceae|Cupressaceae|Sapindaceae|Ebenaceae|Myrtaceae|Celastraceae|Pinaceae|Salicaceae|Rosaceae|Fagaceae|Anacardiaceae|Phyllanthaceae	12	Fabales|Magnoliales|Geraniales|Rosales|Ericales|Cupressales|Sapindales|Myrtales|Celastrales|Pinales|Malpighiales|Fagales	12	Quercus|Pinus|Medicago|Populus|Salix|Cydonia|Malus|Prunus|Pyrus|Psidium|Schinus|Citrus	14	Quercus emoryi|Pinus patula|Medicago sativa|Quercus robur|Populus deltoides|Salix babylonica|Cydonia oblonga|Malus sylvestris|Prunus armeniaca|Prunus domestica|Pyrus communis|Psidium guajava|Schinus molle|Citrus maxima	8	Rutaceae|Rosaceae|Fabaceae|Pinaceae|Salicaceae|Myrtaceae|Fagaceae|Anacardiaceae	7	Sapindales|Rosales|Fabales|Pinales|Malpighiales|Myrtales|Fagales
Saturniidae	Saturniinae	Bunaeini	Pseudobunaea	Pseudobunaea miriakambana									1	Prunus	1	Prunus laurocerasus	1	Rosaceae	1	Rosales
Saturniidae	Saturniinae	Bunaeini	Pseudobunaea	Pseudobunaea tyrrhena	6	Psychotria|Albizia|Celtis|Trema|Ekebergia|Sclerocarya	8	Psychotria capensis|Albizia adianthifolia|Celtis|Celtis africana|Trema orientalis|Ekebergia|Ekebergia capensis|Sclerocarya birrea	5	Fabaceae|Cannabaceae|Meliaceae|Rubiaceae|Anacardiaceae	4	Fabales|Rosales|Sapindales|Gentianales	3	Fagus|Quercus|Celtis	3	Fagus sylvatica|Quercus x turneri|Celtis pallida	2	Cannabaceae|Fagaceae	2	Rosales|Fagales
Saturniidae	Hemileucinae	Hemileucini	Pseudodirphia	Pseudodirphia agis	3	Diospyros|Emmotum|Guazuma	3	Diospyros hispida|Emmotum nitens|Guazuma ulmifolia	3	Ebenaceae|Metteniusaceae|Malvaceae	3	Ericales|Metteniusales|Malvales
Saturniidae	Hemileucinae	Hemileucini	Pseudodirphia	Pseudodirphia eumedide									8	Laburnum|Robinia|Fagus|Quercus|Crataegus|Malus|Prunus|Ulmus	8	Laburnum anagyroides|Robinia pseudoacacia|Fagus sylvatica|Quercus ilex|Crataegus monogyna|Malus|Prunus domestica|Ulmus minor	4	Rosaceae|Fagaceae|Fabaceae|Ulmaceae	3	Rosales|Fagales|Fabales
Saturniidae	Hemileucinae	Hemileucini	Pseudodirphia	Pseudodirphia eumedidoides	1	Eucalyptus	1	Eucalyptus urophylla	1	Myrtaceae	1	Myrtales	2	Robinia|Salix	2	Robinia pseudoacacia|Salix babylonica	2	Fabaceae|Salicaceae	2	Fabales|Malpighiales
Saturniidae	Hemileucinae	Hemileucini	Pseudodirphia	Pseudodirphia menander	13	Philodendron|Rhodospatha|Spathiphyllum|Acalypha|Anthurium|Araceae|Monstera|Chamaedorea|Asplundia|Carludovica|Cyclanthus|Sphaeradenia|Heliconia	17	Philodendron|Rhodospatha|Spathiphyllum laeve|Acalypha diversifolia|Anthurium consobrinum|Araceae sp.|Monstera tenuis|Philodendron rhodoaxis|Philodendron sulcatum|Spathiphyllum wendlandii|Chamaedorea pinnatifrons|Asplundia utilis|Carludovica costaricensis|Cyclanthus bipartitus|Sphaeradenia occidentalis|Heliconia irrasa|Heliconia latispatha	5	Euphorbiaceae|Araceae|Cyclanthaceae|Arecaceae|Heliconiaceae	5	Malpighiales|Alismatales|Pandanales|Arecales|Zingiberales
Saturniidae	Hemileucinae	Hemileucini	Pseudodirphia	Pseudodirphia regia	7	Tetracera|Vitis|Eucalyptus|Davilla|Castilla|Coccoloba|Coussapoa	7	Tetracera hydrophila|Vitis tiliifolia|Eucalyptus tereticornis|Davilla nitida|Castilla elastica|Coccoloba tuerckheimii|Coussapoa nymphaeifolia	6	Moraceae|Polygonaceae|Urticaceae|Dilleniaceae|Myrtaceae|Vitaceae	5	Rosales|Caryophyllales|Dilleniales|Myrtales|Vitales
Saturniidae	Ceratocampinae		Psilopygida	Psilopygida crispula	2	Gleditsia|Acacia	2	Gleditsia triacanthos|Acacia farnesiana	1	Fabaceae	1	Fabales
Saturniidae	Ceratocampinae		Psilopygida	Psilopygida walkeri	2	Calliandra|Mimosa	3	Calliandra parviflora|Mimosa asperata|Mimosa obtusifolia	1	Fabaceae	1	Fabales	6	Acacia|Calliandra|Leucaena|Mimosa|Neptunia|Vigna	19	Acacia deanei|Acacia decurrens|Acacia glaucocarpa|Acacia hemsleyi|Acacia mearnsii|Acacia nilotica|Calliandra calothyrsus|Leucaena collinsi|Leucaena diversifolia|Leucaena lanceolata|Leucaena pallida|Mimosa diplotricha|Mimosa pigra|Mimosa pudica|Mimosa rixosa|Mimosa scabrella|Neptunia dimorphantha|Neptunia major|Vigna unguiculata	1	Fabaceae	1	Fabales
Saturniidae	Ceratocampinae		Ptiloscola	Ptiloscola dargei	4	Acacia|Calliandra|Senegalia|Vachellia	7	Acacia riparia|Acacia tenuifolia|Calliandra rubescens|Calliandra bijuga|Senegalia multipinnata|Senegalia tenuifolia|Vachellia riparia	1	Fabaceae	1	Fabales	1	Acacia	1	Acacia collinsii	1	Fabaceae	1	Fabales
Saturniidae	Arsenurinae	Arsenurini	Rhescyntis	Rhescyntis hippodamia	2	Virola|Otoba	5	Virola oleifera|Virola surinamensis|Virola koschnyi|Virola sebifera|Otoba novogranatensis	1	Myristicaceae	1	Magnoliales	1	Ligustrum	1	Ligustrum sp.	1	Oleaceae	1	Lamiales
Saturniidae	Arsenurinae	Arsenurini	Rhescyntis	Rhescyntis pseudomartii	1	Virola	1	Virola officinalis	1	Myristicaceae	1	Magnoliales	1	Virola	1	Virola oleifera	1	Myristicaceae	1	Magnoliales
Saturniidae	Saturniinae	Saturniini	Rhodinia	Rhodinia davidi	2	Quercus|Populus	3	Quercus aliena|Quercus dentata|Populus davidiana	2	Salicaceae|Fagaceae	2	Malpighiales|Fagales
Saturniidae	Saturniinae	Saturniini	Rhodinia	Rhodinia fugax	12	Carpinus|Fagus|Crataegus|Aesculus|Phellodendron|Castanea|Populus|Prunus|Quercus|Castanopsis|Zelkova|Acer	22	Carpinus|Fagus|Crataegus|Aesculus hippocastanum|Phellodendron|Castanea crenata|Populus maximowiczii|Prunus avium|Prunus serrulata|Castanea|Quercus|Quercus aliena|Quercus dentata|Quercus glauca|Quercus mongolica|Quercus serrata|Castanopsis cuspidata|Quercus acutissima|Quercus variabilis|Prunus|Zelkova serrata|Acer	7	Sapindaceae|Betulaceae|Fagaceae|Rosaceae|Rutaceae|Salicaceae|Ulmaceae	4	Sapindales|Fagales|Rosales|Malpighiales	11	Platanus|Alnus|Castanea|Quercus|Populus|Salix|Crataegus|Prunus|Celtis|Acer|Tilia	15	Platanus|Alnus glutinosa|Castanea|Quercus|Quercus robur|Populus|Salix|Salix babylonica|Crataegus monogyna|Prunus domestica|Prunus virginiana|Celtis|Acer|Prunus|Tilia	8	Sapindaceae|Betulaceae|Fagaceae|Cannabaceae|Rosaceae|Platanaceae|Salicaceae|Malvaceae	6	Sapindales|Fagales|Rosales|Proteales|Malpighiales|Malvales
Saturniidae	Saturniinae	Saturniini	Rhodinia	Rhodinia jankowskii	3	Platanus|Quercus|Phellodendron	4	Platanus occidentalis|Platanus x hispanica|Quercus dentata|Phellodendron amurense	3	Rutaceae|Platanaceae|Fagaceae	3	Sapindales|Proteales|Fagales
Saturniidae	Saturniinae	Saturniini	Rhodinia	Rhodinia newara	3	Juglans|Salix|Acer	4	Juglans|Salix|Salix babylonica|Acer campbellii	3	Sapindaceae|Juglandaceae|Salicaceae	3	Sapindales|Fagales|Malpighiales	6	Carpinus|Juglans|Salix|Crataegus|Acer|Caesalpinia	11	Carpinus betulus|Juglans regia|Salix|Crataegus|Acer campestre|Acer pseudoplatanus|Salix myrtilloides|Acer saccharum|Caesalpinia crista|Salix babylonica|Acer campbellii	6	Sapindaceae|Fabaceae|Betulaceae|Rosaceae|Juglandaceae|Salicaceae	5	Sapindales|Fabales|Fagales|Rosales|Malpighiales
Saturniidae	Saturniinae	Saturniini	Rhodinia	Rhodinia rudloffi									2	Prunus|Tilia	2	Prunus sp.|Tilia sp.	2	Rosaceae|Malvaceae	2	Rosales|Malvales
Saturniidae	Saturniinae	Saturniini	Rhodinia	Rhodinia silkae									2	Prunus|Tilia	2	Prunus sp.|Tilia sp.	2	Rosaceae|Malvaceae	2	Rosales|Malvales
Saturniidae	Saturniinae	Saturniini	Rhodinia	Rhodinia verecunda	2	Quercus|Celtis	4	Quercus acutissima|Quercus aliena|Quercus glauca|Celtis sinensis	2	Cannabaceae|Fagaceae	2	Rosales|Fagales
Saturniidae	Saturniinae	Saturniini	Rinaca	Rinaca bieti	2	Quercus|Juglans	2	Quercus aliena|Juglans regia	2	Juglandaceae|Fagaceae	1	Fagales
Saturniidae	Saturniinae	Saturniini	Rinaca	Rinaca boisduvalii	20	Prunus|Ulmus|Cornus|Lonicera|Fagus|Rosa|Quercus|Betula|Hippophae|Catalpa|Pyrus|Viburnum|Lespedeza|Alnus|Corylus|Juglans|Morus|Malus|Zelkova|Tilia	31	Prunus|Ulmus|Cornus controversa|Lonicera japonica|Fagus crenata|Rosa|Quercus acutissima|Quercus serrata|Quercus variabilis|Betula|Hippophae|Catalpa|Prunus domestica|Pyrus communis|Viburnum odoratissimum|Lespedeza bicolor|Alnus|Corylus heterophylla|Quercus aliena|Juglans|Juglans mandshurica|Juglans regia|Morus alba|Malus baccata|Malus pumila|Prunus mume|Prunus serrulata|Ulmus davidiana|Zelkova ser…	13	Betulaceae|Bignoniaceae|Cornaceae|Fagaceae|Elaeagnaceae|Juglandaceae|Fabaceae|Caprifoliaceae|Rosaceae|Moraceae|Malvaceae|Ulmaceae|Adoxaceae	7	Fagales|Lamiales|Cornales|Rosales|Fabales|Dipsacales|Malvales	12	Salix|Tilia|Acacia|Castanea|Quercus|Juglans|Populus|Malus|Prunus|Sorbus|Zelkova|Acer	14	Salix caprea|Salix cinerea|Tilia cordata|Acacia|Castanea|Quercus|Juglans|Populus|Salix|Malus pumila|Prunus virginiana|Sorbus|Zelkova serrata|Acer	8	Fabaceae|Sapindaceae|Fagaceae|Juglandaceae|Rosaceae|Salicaceae|Malvaceae|Ulmaceae	6	Fabales|Sapindales|Fagales|Rosales|Malpighiales|Malvales
Saturniidae	Saturniinae	Saturniini	Rinaca	Rinaca bonita									2	Salix|Tilia	2	Salix caprea|Tilia sp.	2	Salicaceae|Malvaceae	2	Malpighiales|Malvales
Saturniidae	Saturniinae	Saturniini	Rinaca	Rinaca fukudai	1	Ulmus	1	Ulmus parvifolia	1	Ulmaceae	1	Rosales
Saturniidae	Saturniinae	Saturniini	Rinaca	Rinaca jonasii	3	Castanea|Fagus|Quercus	7	Castanea crenata|Fagus crenata|Quercus acutissima|Quercus dentata|Quercus mongolica|Quercus serrata|Quercus variabilis	1	Fagaceae	1	Fagales	4	Rhododendron|Malus|Acer|Populus	4	Rhododendron sp.|Malus sp.|Acer saccharinum|Populus deltoides	4	Sapindaceae|Rosaceae|Salicaceae|Ericaceae	4	Sapindales|Rosales|Malpighiales|Ericales
Saturniidae	Saturniinae	Saturniini	Rinaca	Rinaca lesoudieri	4	Gardenia|Quercus|Pterocarya|Tilia	4	Gardenia jasminoides|Quercus aliena|Pterocarya stenoptera|Tilia tuan	4	Rubiaceae|Juglandaceae|Fagaceae|Malvaceae	3	Gentianales|Fagales|Malvales	3	Liquidambar|Salix|Acer	7	Liquidambar|Salix|Salix caprea|Salix cf. aurita|Salix cf. babylonica|Salix cf. fragilis|Acer pseudoplatanus	3	Sapindaceae|Altingiaceae|Salicaceae	3	Sapindales|Saxifragales|Malpighiales
Saturniidae	Saturniinae	Saturniini	Rinaca	Rinaca lindia	1	Hippophae	1	Hippophae sp.	1	Elaeagnaceae	1	Rosales	10	Betula|Corylus|Quercus|Juglans|Populus|Salix|Malus|Prunus|Pyrus|Acer	14	Betula pendula|Corylus avellana|Quercus|Quercus robur|Juglans regia|Populus deltoides|Salix|Malus|Prunus avium|Prunus padus|Pyrus calleryana|Acer|Prunus laurocerasus|Acer saccharinum	6	Sapindaceae|Betulaceae|Juglandaceae|Rosaceae|Salicaceae|Fagaceae	4	Sapindales|Fagales|Rosales|Malpighiales
Saturniidae	Saturniinae	Saturniini	Rinaca	Rinaca simla	10	Zingiber|Betula|Juglans|Salix|Malus|Pyrus|Lagerstroemia|Aesculus|Quercus|Boehmeria	15	Zingiber mioga|Betula|Juglans regia|Salix sp.|Salix babylonica|Malus sp.|Pyrus communis|Pyrus pashia|Lagerstroemia|Lagerstroemia indica|Aesculus indica|Quercus sp.|Malus pumila|Pyrus bretschneideri|Boehmeria nivea	9	Sapindaceae|Betulaceae|Urticaceae|Juglandaceae|Lythraceae|Rosaceae|Fagaceae|Salicaceae|Zingiberaceae	6	Sapindales|Fagales|Rosales|Myrtales|Malpighiales|Zingiberales	10	Betula|Carya|Juglans|Salix|Crataegus|Malus|Prunus|Pyrus|Ligustrum|Quercus	12	Betula|Carya|Juglans|Salix babylonica|Salix fragilis|Crataegus|Crataegus monogyna|Malus|Prunus virginiana|Pyrus communis|Ligustrum vulgare|Quercus robur	6	Betulaceae|Juglandaceae|Rosaceae|Oleaceae|Fagaceae|Salicaceae	4	Fagales|Rosales|Lamiales|Malpighiales
Saturniidae	Saturniinae	Saturniini	Rinaca	Rinaca sinanna									1	Liquidambar	1	Liquidambar styraciflua	1	Altingiaceae	1	Saxifragales
Saturniidae	Saturniinae	Saturniini	Rinaca	Rinaca thibeta	7	Lyonia|Cydonia|Pyrus|Cinnamomum|Quercus|Pterocarya|Glochidion	9	Lyonia ovalifolia|Cydonia oblonga|Pyrus pashia|Cinnamomum camphora|Quercus acutissima|Quercus aliena|Quercus variabilis|Pterocarya stenoptera|Glochidion zeylanicum	6	Lauraceae|Rosaceae|Phyllanthaceae|Ericaceae|Juglandaceae|Fagaceae	5	Laurales|Rosales|Malpighiales|Ericales|Fagales	5	Ligustrum|Persea|Prunus|Pyracantha|Malus	6	Ligustrum vulgare|Persea americana|Prunus laurocerasus|Pyracantha|Ligustrum ovalifolium|Malus Hillieri	3	Oleaceae|Rosaceae|Lauraceae	3	Lamiales|Rosales|Laurales
Saturniidae	Saturniinae	Saturniini	Rinaca	Rinaca tibetanna	3	Cinnamomum|Juglans|Sapium	3	Cinnamomum camphora|Juglans sp.|Sapium sebiferum	3	Lauraceae|Juglandaceae|Euphorbiaceae	3	Laurales|Fagales|Malpighiales
Saturniidae	Saturniinae	Saturniini	Rinaca	Rinaca tsinlingshanis									2	Alnus|Tilia	2	Alnus sp.|Tilia sp.	2	Betulaceae|Malvaceae	2	Fagales|Malvales
Saturniidae	Saturniinae	Saturniini	Rinaca	Rinaca zuleika	3	Actinodaphne|Betula|Acer	4	Actinodaphne sikkimensis|Betula|Betula utilis|Acer caudatum	3	Sapindaceae|Lauraceae|Betulaceae	3	Sapindales|Laurales|Fagales
Saturniidae	Saturniinae	Saturniini	Rinaca	Rinaca dentifasciata	1	Condalia	1	Condalia ericoides	1	Rhamnaceae	1	Rosales	1	Condalia	1	Condalia hookeri	1	Rhamnaceae	1	Rosales
Saturniidae	Saturniinae	Bunaeini	Rohaniella	Rohaniella pygmaea	2	Burkea|Ficus	2	Burkea africana|Ficus salicifolia	2	Fabaceae|Moraceae	2	Fabales|Rosales	1	Burkea	1	Burkea africana	1	Fabaceae	1	Fabales
Saturniidae	Saturniinae	Attacini	Rothschildia	Rothschildia	5	Ilex|Cassia|Ricinus|Mangifera|Citrus	5	Ilex paraguariensis|Cassia|Ricinus communis|Mangifera indica|Citrus maxima	5	Fabaceae|Rutaceae|Aquifoliaceae|Anacardiaceae|Euphorbiaceae	4	Fabales|Sapindales|Aquifoliales|Malpighiales
Saturniidae	Saturniinae	Attacini	Rothschildia	Rothschildia arethusa	21	Jatropha|Citrus|Pentapanax|Baccharis|Helianthus|Mikania|Lonicera|Rauvolfia|Cephalanthus|Jacaranda|Tabebuia|Lantana|Licania|Ricinus|Sapium|Fragaria|Prunus|Boehmeria|Anacardium|Mangifera|Eugenia	27	Jatropha gossypiifolia|Citrus maxima|Pentapanax angelicifolius|Baccharis sp.|Helianthus annuus|Mikania scandens|Lonicera caprifolium|Lonicera japonica|Rauvolfia sellowii|Cephalanthus glabratus|Jacaranda acutifolia|Jacaranda caroba|Tabebuia chrysotricha|Lantana sp.|Licania tomentosa|Ricinus communis|Sapium sp.|Sapium glandulosum|Sapium haematospermum|Fragaria vesca|Prunus domestica|Prunus dulcis|P…	14	Anacardiaceae|Asteraceae|Urticaceae|Rubiaceae|Rutaceae|Myrtaceae|Rosaceae|Bignoniaceae|Euphorbiaceae|Verbenaceae|Chrysobalanaceae|Caprifoliaceae|Araliaceae|Apocynaceae	9	Sapindales|Asterales|Rosales|Gentianales|Myrtales|Lamiales|Malpighiales|Dipsacales|Apiales	8	Lactuca|Ligustrum|Syringa|Quercus|Morus|Prunus|Ailanthus|Sapium	12	Lactuca|Ligustrum|Ligustrum ovalifolium|Syringa vulgaris|Quercus|Morus|Prunus domestica|Prunus persica|Ailanthus altissima|Sapium haematospermum|Ligustrum vulgare|Syringa	7	Simaroubaceae|Asteraceae|Oleaceae|Moraceae|Rosaceae|Fagaceae|Euphorbiaceae	6	Sapindales|Asterales|Lamiales|Rosales|Fagales|Malpighiales
Saturniidae	Saturniinae	Attacini	Rothschildia	Rothschildia aurota	20	Ilex|Lonicera|Annona|Rollinia|Ricinus|Sapium|Morus|Chorisia|Schinus|Spondias|Citrus|Zanthoxylum|Tecoma|Cephalanthus|Chiococca|Bambusa|Joannesia|Casearia|Prunus|Anacardium	30	Ilex paraguariensis|Lonicera japonica|Lonicera periclymenum|Lonicera semenovii|Annona|Rollinia mucosa|Ricinus communis|Sapium glandulosum|Morus alba|Chorisia speciosa|Schinus terebinthifolius|Spondias mombin|Citrus|Zanthoxylum caribaeum|Zanthoxylum rhoifolium|Tecoma stans|Citrus aurantium|Zanthoxylum coco|Lonicera caprifolium|Cephalanthus glabratus|Chiococca alba|Bambusa|Joannesia gomesii|Joannes…	13	Anacardiaceae|Annonaceae|Poaceae|Salicaceae|Rubiaceae|Malvaceae|Rutaceae|Aquifoliaceae|Euphorbiaceae|Caprifoliaceae|Moraceae|Rosaceae|Bignoniaceae	10	Sapindales|Magnoliales|Poales|Malpighiales|Gentianales|Malvales|Aquifoliales|Dipsacales|Rosales|Lamiales	18	Sambucus|Fraxinus|Ligustrum|Syringa|Cinnamomum|Ricinus|Salix|Prunus|Eucalyptus|Psidium|Anacardium|Citrus|Bambusa|Euonymus|Manihot|Casearia|Swietenia|Ailanthus	25	Sambucus|Fraxinus excelsior|Ligustrum ovalifolium|Syringa vulgaris|Cinnamomum|Ricinus communis|Salix caprea|Prunus laurocerasus|Eucalyptus|Psidium guajava|Anacardium occidentale|Citrus maxima|Fraxinus|Ligustrum|Ligustrum vulgare|Syringa|Bambusa|Euonymus europaeus|Manihot esculenta|Casearia ramiflora|Prunus pensylvanica|Prunus persica|Swietenia|Ailanthus|Ailanthus altissima	13	Simaroubaceae|Anacardiaceae|Poaceae|Salicaceae|Lauraceae|Rutaceae|Myrtaceae|Celastraceae|Oleaceae|Euphorbiaceae|Rosaceae|Adoxaceae|Meliaceae	9	Sapindales|Poales|Malpighiales|Laurales|Myrtales|Celastrales|Lamiales|Rosales|Dipsacales
Saturniidae	Saturniinae	Attacini	Rothschildia	Rothschildia belus	4	Citrus|Coccoloba|Croton|Dodonaea	4	Citrus|Coccoloba|Croton|Dodonaea viscosa	4	Rutaceae|Polygonaceae|Euphorbiaceae|Sapindaceae	3	Sapindales|Caryophyllales|Malpighiales
Saturniidae	Saturniinae	Attacini	Rothschildia	Rothschildia cinctus	4	Jatropha|Sapium|Schinus|Dodonaea	6	Jatropha|Sapium biloculare|Schinus molle|Dodonaea viscosa|Jatropha curcas|Dodonaea	3	Sapindaceae|Euphorbiaceae|Anacardiaceae	2	Sapindales|Malpighiales	8	Ligustrum|Syringa|Quercus|Prunus|Schinus|Citrus|Fraxinus|Salix	12	Ligustrum|Syringa vulgaris|Quercus|Prunus serotina|Schinus molle|Citrus|Fraxinus|Syringa|Salix|Prunus|Prunus cerasus|Prunus persica	6	Rutaceae|Oleaceae|Rosaceae|Fagaceae|Salicaceae|Anacardiaceae	5	Sapindales|Lamiales|Rosales|Fagales|Malpighiales
Saturniidae	Saturniinae	Attacini	Rothschildia	Rothschildia condor	1	Baccharis	4	Baccharis myrtilloides|Baccharis rubricaulis|Baccharis salicifolia|Baccharis sculpta	1	Asteraceae	1	Asterales
Saturniidae	Saturniinae	Attacini	Rothschildia	Rothschildia equatorialis									2	Ligustrum|Persea	2	Ligustrum ovalifolium|Persea americana	2	Oleaceae|Lauraceae	2	Lamiales|Laurales
Saturniidae	Saturniinae	Attacini	Rothschildia	Rothschildia erycina	9	Chiococca|Coutarea|Exostema|Antonia|Cenostigma|Casearia|Rhizophora|Coffea|Allenanthus	12	Chiococca alba|Chiococca belizensis|Coutarea hexandra|Exostema mexicanum|Antonia ovata|Cenostigma macrophyllum|Casearia grandiflora|Casearia ramiflora|Rhizophora mangle|Coffea|Exostema sanctae-luciae|Allenanthus erythrocarpus	5	Rubiaceae|Loganiaceae|Salicaceae|Fabaceae|Rhizophoraceae	3	Gentianales|Malpighiales|Fabales	7	Ligustrum|Syringa|Cinnamomum|Salix|Prunus|Psidium|Ailanthus	8	Ligustrum ovalifolium|Ligustrum vulgare|Syringa vulgaris|Cinnamomum|Salix caprea|Prunus laurocerasus|Psidium guajava|Ailanthus altissima	6	Simaroubaceae|Lauraceae|Oleaceae|Rosaceae|Myrtaceae|Salicaceae	6	Sapindales|Laurales|Lamiales|Rosales|Myrtales|Malpighiales
Saturniidae	Saturniinae	Attacini	Rothschildia	Rothschildia hesperus	11	Myroxylon|Schinus|Citrus|Lonicera|Coffea|Bambusa|Croton|Manihot|Ricinus|Eugenia|Anacardium	13	Myroxylon peruiferum|Schinus terebinthifolius|Citrus maxima|Lonicera japonica|Coffea|Bambusa|Croton|Croton hemiartyreus|Croton urucurana|Manihot esculenta|Ricinus communis|Eugenia chartacea|Anacardium occidentale	8	Anacardiaceae|Poaceae|Rutaceae|Rubiaceae|Euphorbiaceae|Myrtaceae|Caprifoliaceae|Fabaceae	7	Sapindales|Poales|Gentianales|Malpighiales|Myrtales|Dipsacales|Fabales	13	Ligustrum|Syringa|Cinnamomum|Ricinus|Salix|Prunus|Eucalyptus|Psidium|Rhus|Lonicera|Pyrus|Citrus|Ailanthus	15	Ligustrum ovalifolium|Syringa vulgaris|Cinnamomum|Ricinus communis|Salix caprea|Prunus serotina|Eucalyptus|Psidium guajava|Rhus|Lonicera caprifolium|Pyrus communis|Citrus maxima|Ligustrum|Prunus armeniaca|Ailanthus altissima	10	Simaroubaceae|Lauraceae|Rutaceae|Myrtaceae|Oleaceae|Caprifoliaceae|Rosaceae|Anacardiaceae|Euphorbiaceae|Salicaceae	7	Sapindales|Laurales|Myrtales|Lamiales|Dipsacales|Rosales|Malpighiales
Saturniidae	Saturniinae	Attacini	Rothschildia	Rothschildia hopfferi	1	Jacaranda	1	Jacaranda caroba	1	Bignoniaceae	1	Lamiales
Saturniidae	Saturniinae	Attacini	Rothschildia	Rothschildia inca	19	Allamanda|Coutarea|Exostema|Uncaria|Cestrum|Erythroxylum|Croton|Hippomane|Jatropha|Casearia|Zuelania|Rhizophora|Prunus|Trichospermum|Conocarpus|Spondias|Swietenia|Citrus|Zanthoxylum	27	Allamanda cathartica|Coutarea hexandra|Exostema|Exostema caribaeum|Exostema mexicanum|Uncaria tomentosa|Cestrum racemosum|Erythroxylum havanense|Croton schiedeanus|Hippomane mancinella|Jatropha curcas|Casearia nitida|Casearia sylvestris|Casearia tremula|Zuelania guidonia|Rhizophora mangle|Prunus annularis|Trichospermum galeottii|Conocarpus erectus|Spondias mombin|Spondias purpurea|Swietenia macro…	13	Apocynaceae|Salicaceae|Solanaceae|Rutaceae|Combretaceae|Rubiaceae|Euphorbiaceae|Erythroxylaceae|Rosaceae|Rhizophoraceae|Anacardiaceae|Meliaceae|Malvaceae	7	Gentianales|Malpighiales|Solanales|Sapindales|Myrtales|Rosales|Malvales	8	Ligustrum|Annona|Erythroxylum|Jatropha|Sapium|Salix|Prunus|Pachira	9	Ligustrum ovalifolium|Annona purpurea|Erythroxylum havanense|Jatropha curcas|Sapium macrocarpum|Salix alba|Salix daphnoides|Prunus domestica|Pachira quinata	7	Annonaceae|Erythroxylaceae|Euphorbiaceae|Oleaceae|Malvaceae|Rosaceae|Salicaceae	5	Magnoliales|Malpighiales|Lamiales|Malvales|Rosales
Saturniidae	Saturniinae	Attacini	Rothschildia	Rothschildia jacobaeae	13	Ilex|Baccharis|Senecio|Cephalanthus|Jacaranda|Tecoma|Alchornea|Manihot|Ricinus|Cydonia|Sida|Dodonaea|Pinus	22	Ilex paraguariensis|Baccharis cordifolia|Baccharis dracunculifolia|Baccharis macrodonta|Baccharis marginalis|Baccharis salicifolia|Baccharis salicina|Baccharis trimera|Senecio|Cephalanthus glabratus|Jacaranda acutifolia|Jacaranda caroba|Jacaranda mimosifolia|Tecoma stans|Alchornea iricurana|Manihot esculenta|Ricinus communis|Cydonia oblonga|Sida acuta|Sida cordifolia?|Dodonaea viscosa|Pinus radia…	9	Euphorbiaceae|Asteraceae|Rubiaceae|Rosaceae|Sapindaceae|Aquifoliaceae|Bignoniaceae|Pinaceae|Malvaceae	9	Malpighiales|Asterales|Gentianales|Rosales|Sapindales|Aquifoliales|Lamiales|Pinales|Malvales	4	Baccharis|Ligustrum|Syringa|Prunus	9	Baccharis|Ligustrum|Ligustrum ovalifolium|Syringa|Syringa vulgaris|Prunus persica|Prunus serotina|Prunus virginiana|Ligustrum vulgare	3	Asteraceae|Oleaceae|Rosaceae	3	Asterales|Lamiales|Rosales
Saturniidae	Saturniinae	Attacini	Rothschildia	Rothschildia jorulla	1	Jatropha	1	Jatropha curcas	1	Euphorbiaceae	1	Malpighiales	7	Ligustrum|Syringa|Acacia|Quercus|Prunus|Ailanthus|Salix	10	Ligustrum|Syringa vulgaris|Acacia|Quercus|Prunus|Prunus laurocerasus|Ailanthus altissima|Ligustrum vulgare|Syringa|Salix discolor	6	Fabaceae|Simaroubaceae|Oleaceae|Rosaceae|Fagaceae|Salicaceae	6	Fabales|Sapindales|Lamiales|Rosales|Fagales|Malpighiales
Saturniidae	Saturniinae	Attacini	Rothschildia	Rothschildia lebeau	32	Spondias|Gelsemium|Chiococca|Fraxinus|Acacia|Sapium|Salix|Prunus|Lagerstroemia|Citrus|Zanthoxylum|Annona|Oreopanax|Conocarpus|Erythroxylum|Croton|Hippomane|Jatropha|Lacistema|Pachira|Trichospermum|Swietenia|Hieronyma|Rhizophora|Allenanthus|Coutarea|Exostema|Isertia|Uncaria|Casearia|Zuelania|Cestrum	48	Spondias|Gelsemium sempervirens|Chiococca alba|Fraxinus|Fraxinus berlandieriana|Acacia|Sapium sebiferum|Salix|Salix humboldtiana|Prunus persica|Lagerstroemia|Citrus|Citrus maxima|Fraxinus velutina|Zanthoxylum fagara|Spondias mombin|Annona purpurea|Oreopanax capitatus|Conocarpus erectus|Erythroxylum havanense|Erythroxylum rotundifolium|Croton schiedeanus|Hippomane mancinella|Jatropha curcas|Sapium…	20	Fabaceae|Rubiaceae|Annonaceae|Salicaceae|Solanaceae|Rutaceae|Combretaceae|Euphorbiaceae|Erythroxylaceae|Oleaceae|Gelsemiaceae|Phyllanthaceae|Lacistemataceae|Lythraceae|Araliaceae|Malvaceae|Rosaceae|Rhizophoraceae|Anacardiaceae|Meliaceae	11	Fabales|Gentianales|Magnoliales|Malpighiales|Solanales|Sapindales|Myrtales|Lamiales|Apiales|Malvales|Rosales	13	Fraxinus|Ligustrum|Salix|Prunus|Rhus|Cephalanthus|Tecoma|Syringa|Ricinus|Lythrum|Malosma|Schinus|Ailanthus	24	Fraxinus excelsior|Ligustrum ovalifolium|Salix caprea|Prunus avium|Prunus laurocerasus|Rhus|Prunus serotina|Cephalanthus occidentalis|Tecoma stans|Fraxinus|Ligustrum|Syringa vulgaris|Ricinus communis|Salix|Prunus|Lythrum salicaria|Ligustrum vulgare|Syringa|Ligustrum japonicum|Salix discolor|Salix exigua|Malosma laurina|Schinus terebinthifolius|Ailanthus altissima	9	Simaroubaceae|Rubiaceae|Oleaceae|Lythraceae|Anacardiaceae|Rosaceae|Euphorbiaceae|Salicaceae|Bignoniaceae	6	Sapindales|Gentianales|Lamiales|Myrtales|Rosales|Malpighiales
Saturniidae	Saturniinae	Attacini	Rothschildia	Rothschildia lebecuatoriana									2	Syringa|Ligustrum	2	Syringa sp.|Ligustrum sp.	1	Oleaceae	1	Lamiales
Saturniidae	Saturniinae	Attacini	Rothschildia	Rothschildia maurus	1	Croton	2	Croton sp.|Croton tucumanensis	1	Euphorbiaceae	1	Malpighiales
Saturniidae	Saturniinae	Attacini	Rothschildia	Rothschildia orizaba	2	Coffea|Prunus	2	Coffea sp.|Prunus sp.	2	Rubiaceae|Rosaceae	2	Gentianales|Rosales	9	Liquidambar|Fraxinus|Ligustrum|Syringa|Sassafras|Salix|Prunus|Schinus|Malosma	21	Liquidambar styraciflua|Fraxinus|Fraxinus excelsior|Ligustrum|Ligustrum ovalifolium|Syringa vulgaris|Sassafras albidum|Salix caprea|Prunus armeniaca|Prunus avium|Prunus domestica|Prunus laurocerasus|Prunus persica|Prunus serotina|Prunus virginiana|Ligustrum vulgare|Syringa|Fraxinus americana|Ligustrum japonicum|Schinus molle|Malosma laurina	6	Oleaceae|Altingiaceae|Anacardiaceae|Rosaceae|Salicaceae|Lauraceae	6	Lamiales|Saxifragales|Sapindales|Rosales|Malpighiales|Laurales
Saturniidae	Saturniinae	Attacini	Rothschildia	Rothschildia roxana									3	Ligustrum|Syringa|Prunus	4	Ligustrum|Ligustrum ovalifolium|Syringa vulgaris|Prunus serotina	2	Oleaceae|Rosaceae	2	Lamiales|Rosales
Saturniidae	Saturniinae	Attacini	Rothschildia	Rothschildia schreiteriana	4	Vallesia|Jacaranda|Schinus|Sapium	6	Vallesia glabra|Jacaranda mimosifolia|Schinus|Jacaranda acutifolia|Sapium haematospermum|Schinus molle	4	Bignoniaceae|Euphorbiaceae|Anacardiaceae|Apocynaceae	4	Lamiales|Malpighiales|Sapindales|Gentianales	1	Ligustrum	1	Ligustrum vulgare	1	Oleaceae	1	Lamiales
Saturniidae	Saturniinae	Attacini	Rothschildia	Rothschildia triloba	40	Dendropanax|Vernonanthura|Viburnum|Chiococca|Chione|Coutarea|Exostema|Uncaria|Jatropha|Sapium|Casearia|Lacistema|Prunus|Mosquitoxylum|Tapirira|Guarea|Swietenia|Zanthoxylum|Simarouba|Picrasma|Spondias|Ilex|Oreopanax|Schefflera|Lepidaploa|Tetragastris|Croton|Gymnanthes|Lozania|Nectandra|Trichospermum|Ternstroemia|Lasiacis|Allenanthus|Chimarrhis|Cosmibuena|Guettarda|Psychotria|Meliosma|Symplocos	57	Dendropanax arboreus|Vernonanthura patens|Viburnum costaricanum|Chiococca alba|Chiococca belizensis|Chiococca pachyphylla|Chione sylvicola|Coutarea hexandra|Exostema caribaeum|Exostema mexicanum|Uncaria tomentosa|Jatropha curcas|Sapium|Sapium glandulosum|Casearia arborea|Casearia corymbosa|Lacistema aggregatum|Prunus annularis|Mosquitoxylum jamaicense|Tapirira mexicana|Guarea rhopalocarpa|Swieten…	20	Rubiaceae|Salicaceae|Euphorbiaceae|Araliaceae|Meliaceae|Aquifoliaceae|Lacistemataceae|Poaceae|Asteraceae|Sabiaceae|Anacardiaceae|Lauraceae|Simaroubaceae|Rosaceae|Symplocaceae|Pentaphylacaceae|Burseraceae|Malvaceae|Adoxaceae|Rutaceae	13	Gentianales|Malpighiales|Apiales|Sapindales|Aquifoliales|Poales|Asterales|Proteales|Laurales|Rosales|Ericales|Malvales|Dipsacales
Saturniidae	Saturniinae	Attacini	Rothschildia	Rothschildia tucumani	2	Baccharis|Eupatorium	2	Baccharis sp.|Eupatorium buniifolium	1	Asteraceae	1	Asterales
Saturniidae	Saturniinae	Attacini	Rothschildia	Rothschildia winbrechlini									2	Ligustrum|Syringa	2	Syringa sp.|Ligustrum sp.	1	Oleaceae	1	Lamiales
Saturniidae	Saturniinae	Attacini	Rothschildia	Rothschildia zacateca	1	Symplocos	1	Symplocos alstonia	1	Symplocaceae	1	Ericales	2	Ligustrum|Prunus	3	Ligustrum ovalifolium|Prunus capuli|Prunus serotina	2	Oleaceae|Rosaceae	2	Lamiales|Rosales
Saturniidae	Salassinae		Salassa										1	Prunus	1	Prunus sp.	1	Rosaceae	1	Rosales
Saturniidae	Salassinae		Salassa	Salassa iris									1	Prunus	2	Prunus sp.|Prunus padus	1	Rosaceae	1	Rosales
Saturniidae	Salassinae		Salassa	Salassa lola	2	Toxicodendron|Cissus	2	Toxicodendron vernicifluum|Cissus repens	2	Vitaceae|Anacardiaceae	2	Vitales|Sapindales
Saturniidae	Salassinae		Salassa	Salassa mesosa									1	Salix	1	Salix triandra	1	Salicaceae	1	Malpighiales
Saturniidae	Salassinae		Salassa	Salassa olivacea	2	Quercus|Ficus	2	Quercus dentata|Ficus microcarpa	2	Moraceae|Fagaceae	2	Rosales|Fagales
Saturniidae	Salassinae		Salassa	Salassa thespis	3	Cinnamomum|Alnus|Pterocarya	3	Cinnamomum camphora|Alnus cremastogyne|Pterocarya stenoptera	3	Betulaceae|Lauraceae|Juglandaceae	2	Fagales|Laurales
Saturniidae	Saturniinae	Attacini	Samia		9	Cichorium|Lactuca|Salix|Daucus|Cirsium|Taraxacum|Viburnum|Clinopodium|Jasminum	9	Cichorium intybus|Lactuca sativa|Salix|Daucus carota|Cirsium maackii|Taraxacum mongolicum|Viburnum odoratissimum|Clinopodium gracilis|Jasminum	6	Asteraceae|Lamiaceae|Apiaceae|Oleaceae|Salicaceae|Adoxaceae	5	Asterales|Lamiales|Apiales|Malpighiales|Dipsacales	17	Ligustrum|Heteropanax|Dipsacus|Fraxinus|Syringa|Gmelina|Coriaria|Jatropha|Manihot|Ricinus|Sapium|Morus|Ziziphus|Prunus|Euodia|Ailanthus|Tilia	19	Ligustrum ovalifolium|Heteropanax fragrans|Dipsacus|Fraxinus pennsylvanica|Ligustrum|Syringa vulgaris|Gmelina arborea|Coriaria nepalensis|Jatropha curcas|Manihot esculenta|Ricinus communis|Sapium sebiferum|Morus|Ziziphus mauritiana|Prunus virginiana|Euodia fraxinifolia|Ailanthus altissima|Ailanthus excelsa|Tilia cordata	12	Simaroubaceae|Coriariaceae|Caprifoliaceae|Rutaceae|Oleaceae|Lamiaceae|Araliaceae|Euphorbiaceae|Moraceae|Rosaceae|Malvaceae|Rhamnaceae	8	Sapindales|Cucurbitales|Dipsacales|Lamiales|Apiales|Malpighiales|Rosales|Malvales
Saturniidae	Saturniinae	Attacini	Samia	Samia beekei									2	Ligustrum|Salix	2	Ligustrum ovalifolium|Salix sp.	2	Oleaceae|Salicaceae	2	Lamiales|Malpighiales
Saturniidae	Saturniinae	Attacini	Samia	Samia canningi	33	Symplocos|Persea|Coriaria|Zanthoxylum|Heteropanax|Neolamarckia|Cinnamomum|Litsea|Berberis|Manihot|Ricinus|Sapium|Glochidion|Duabanga|Psidium|Canarium|Euodia|Ailanthus|Plumeria|Ligustrum|Gmelina|Cassia|Carpinus|Juglans|Jatropha|Ziziphus|Malus|Prunus|Carica|Althaea|Lagerstroemia|Lawsonia|Azadirachta	38	Symplocos sp.|Persea americana|Coriaria nepalensis|Zanthoxylum alatum|Zanthoxylum armatum|Zanthoxylum hostile|Zanthoxylum acanthopodium|Heteropanax fragrans|Neolamarckia cadamba|Cinnamomum cecidodaphne|Litsea cubeba|Litsea salicifolia|Berberis asiatica|Manihot esculenta|Ricinus communis|Sapium insigne|Glochidion leiostylum|Duabanga grandifolra|Psidium guajava|Canarium indicum|Euodia fraxinifolia|…	24	Simaroubaceae|Malvaceae|Meliaceae|Berberidaceae|Burseraceae|Caricaceae|Betulaceae|Fabaceae|Lauraceae|Coriariaceae|Lythraceae|Rutaceae|Phyllanthaceae|Lamiaceae|Araliaceae|Euphorbiaceae|Juglandaceae|Oleaceae|Rosaceae|Rubiaceae|Apocynaceae|Myrtaceae|Symplocaceae|Rhamnaceae	15	Sapindales|Malvales|Ranunculales|Brassicales|Fagales|Fabales|Laurales|Cucurbitales|Myrtales|Malpighiales|Lamiales|Apiales|Rosales|Gentianales|Ericales	6	Syringa|Ricinus|Prunus|Ailanthus|Laburnum|Tilia	7	Syringa vulgaris|Ricinus communis|Prunus serotina|Ailanthus altissima|Laburnum anagyroides|Tilia cordata|Ailanthus excelsa	6	Simaroubaceae|Fabaceae|Rosaceae|Euphorbiaceae|Oleaceae|Malvaceae	6	Sapindales|Fabales|Rosales|Malpighiales|Lamiales|Malvales
Saturniidae	Saturniinae	Attacini	Samia	Samia cynthia	49	Liquidambar|Cornus|Lysimachia|Styrax|Ilex|Ageratina|Viburnum|Fraxinus|Solanum|Lindera|Sassafras|Platanus|Celastrus|Euonymus|Quercus|Juglans|Salix|Ziziphus|Malus|Prunus|Pyrus|Sorbus|Spiraea|Tilia|Acer|Rhus|Ptelea|Zanthoxylum|Ailanthus|Picrasma|Sambucus|Syringa|Cinnamomum|Berberis|Ulmus|Apium|Stereospermum|Ipomoea|Laurus|Cananga|Magnolia|Trichilia|Euodia|Michelia|Sapium|Artocarpus|Hovenia|Firmiana|…	73	Liquidambar styraciflua|Cornus sp.|Cornus florida|Cornus sericea|Lysimachia arvensis|Styrax japonicus|Ilex sp.|Ilex integra|Ilex opaca|Ageratina ageratoides|Viburnum lentago|Fraxinus sp.|Solanum dulcamara|Lindera benzoin|Sassafras albidum|Platanus occidentalis|Celastrus scandens|Euonymus europaeus|Quercus acutissima|Juglans sp.|Juglans cinerea|Salix sp.|Ziziphus jujuba|Malus pumila|Prunus sp.|Pru…	32	Sapindaceae|Asteraceae|Simaroubaceae|Apiaceae|Moraceae|Berberidaceae|Annonaceae|Celastraceae|Lauraceae|Cornaceae|Rutaceae|Malvaceae|Oleaceae|Rhamnaceae|Aquifoliaceae|Convolvulaceae|Juglandaceae|Altingiaceae|Primulaceae|Magnoliaceae|Rosaceae|Platanaceae|Fagaceae|Anacardiaceae|Salicaceae|Adoxaceae|Euphorbiaceae|Solanaceae|Bignoniaceae|Styracaceae|Meliaceae|Ulmaceae	19	Sapindales|Asterales|Apiales|Rosales|Ranunculales|Magnoliales|Celastrales|Laurales|Cornales|Malvales|Lamiales|Aquifoliales|Solanales|Fagales|Saxifragales|Ericales|Proteales|Malpighiales|Dipsacales	17	Cornus|Sambucus|Forsythia|Fraxinus|Ligustrum|Syringa|Sassafras|Liriodendron|Ricinus|Prunus|Tilia|Lythrum|Ailanthus|Daphniphyllum|Cytisus|Salix|Rhus	22	Cornus|Sambucus|Forsythia|Fraxinus|Ligustrum|Ligustrum ovalifolium|Syringa|Syringa vulgaris|Sassafras albidum|Liriodendron tulipifera|Ricinus communis|Prunus cerasus|Prunus domestica|Prunus serotina|Tilia|Lythrum salicaria|Ailanthus altissima|Daphniphyllum oldhamii|Tilia cordata|Cytisus|Salix|Rhus typhina	14	Simaroubaceae|Cornaceae|Fabaceae|Daphniphyllaceae|Oleaceae|Magnoliaceae|Lythraceae|Rosaceae|Anacardiaceae|Euphorbiaceae|Salicaceae|Adoxaceae|Lauraceae|Malvaceae	12	Sapindales|Cornales|Fabales|Saxifragales|Lamiales|Magnoliales|Myrtales|Rosales|Malpighiales|Dipsacales|Laurales|Malvales
Saturniidae	Saturniinae	Attacini	Samia	Samia fulva	2	Heteropanax|Zanthoxylum	2	Heteropanax fragrans|Zanthoxylum rhetsa	2	Araliaceae|Rutaceae	2	Apiales|Sapindales	2	Heteropanax|Zanthoxylum	2	Heteropanax fragrans|Zanthoxylum rhetsa	2	Araliaceae|Rutaceae	2	Apiales|Sapindales
Saturniidae	Saturniinae	Attacini	Samia	Samia insularis	4	Erythrina|Camellia|Cinchona|Syzygium	7	Erythrina variegata|Camellia sinensis|Cinchona pubescens|Erythrina subumbrans|Syzygium aqueum|Cinchona|Erythrina	4	Theaceae|Rubiaceae|Fabaceae|Myrtaceae	4	Ericales|Gentianales|Fabales|Myrtales	1	Erythrina	1	Erythrina variegata	1	Fabaceae	1	Fabales
Saturniidae	Saturniinae	Attacini	Samia	Samia kikibudiamini	2	Toddalia|Zanthoxylum	2	Toddalia asiatica|Zanthoxylum armatum	1	Rutaceae	1	Sapindales	5	Ligustrum|Syringa|Quercus|Psidium|Ailanthus	5	Ligustrum ovalifolium|Syringa vulgaris|Quercus|Psidium guajava|Ailanthus altissima	4	Simaroubaceae|Oleaceae|Myrtaceae|Fagaceae	4	Sapindales|Lamiales|Myrtales|Fagales
Saturniidae	Saturniinae	Attacini	Samia	Samia luzonica	1	Cananga	1	Cananga sp.	1	Annonaceae	1	Magnoliales
Saturniidae	Saturniinae	Attacini	Samia	Samia pryeri	7	Ilex|Quercus|Ricinus|Sapium|Phellodendron|Ailanthus|Picrasma	7	Ilex rotunda|Quercus acutissima|Ricinus communis|Sapium|Phellodendron amurense|Ailanthus altissima|Picrasma	5	Simaroubaceae|Aquifoliaceae|Rutaceae|Fagaceae|Euphorbiaceae	4	Sapindales|Aquifoliales|Fagales|Malpighiales	2	Syringa|Ailanthus	2	Syringa vulgaris|Ailanthus altissima	2	Simaroubaceae|Oleaceae	2	Sapindales|Lamiales
Saturniidae	Saturniinae	Attacini	Samia	Samia vandenberghi									1	Ligustrum	2	Ligustrum japonicum|Ligustrum ovalifolium	1	Oleaceae	1	Lamiales
Saturniidae	Saturniinae	Attacini	Samia	Samia wangi	20	Lantana|Sapium|Daphniphyllum|Camptotheca|Paulownia|Cinnamomum|Lindera|Michelia|Platanus|Robinia|Pterocarya|Ricinus|Glochidion|Rhamnus|Euscaphis|Pistacia|Rhus|Citrus|Zanthoxylum|Ailanthus	21	Lantana|Sapium sebiferum|Daphniphyllum oldhamii|Camptotheca acuminata|Paulownia tomentosa|Cinnamomum camphora|Lindera megaphylla|Michelia alba|Platanus x hispanica|Robinia pseudoacacia|Pterocarya stenoptera|Ricinus communis|Sapium discolor|Glochidion zeylanicum|Rhamnus formosana|Euscaphis japonica|Pistacia chinensis|Rhus chinensis|Citrus reticulata|Zanthoxylum bungeanum|Ailanthus altissima	16	Simaroubaceae|Nyssaceae|Lauraceae|Rutaceae|Daphniphyllaceae|Staphyleaceae|Phyllanthaceae|Verbenaceae|Magnoliaceae|Paulowniaceae|Anacardiaceae|Platanaceae|Juglandaceae|Rhamnaceae|Euphorbiaceae|Fabaceae	12	Sapindales|Cornales|Laurales|Saxifragales|Crossosomatales|Malpighiales|Lamiales|Magnoliales|Proteales|Fagales|Rosales|Fabales	2	Tilia|Ailanthus	2	Tilia cordata|Ailanthus altissima	2	Simaroubaceae|Malvaceae	2	Sapindales|Malvales
Saturniidae	Saturniinae	Attacini	Samia	Samia watsoni	1	Manihot	1	Manihot esculenta	1	Euphorbiaceae	1	Malpighiales
Saturniidae	Saturniinae	Saturniini	Saturnia										2	Pyrus|Spiraea	2	Pyrus sp.|Spiraea sp.	1	Rosaceae	1	Rosales
Saturniidae	Saturniinae	Saturniini	Saturnia	Saturnia atlantica	8	Fraxinus|Olea|Syringa|Alnus|Quercus|Rhamnus|Prunus|Rosa	9	Fraxinus|Fraxinus berlandieriana|Olea europaea|Syringa vulgaris|Alnus|Quercus ilex|Rhamnus|Prunus armeniaca|Rosa	5	Betulaceae|Oleaceae|Rosaceae|Fagaceae|Rhamnaceae	3	Fagales|Lamiales|Rosales	3	Fraxinus|Malus|Prunus	3	Fraxinus excelsior|Malus domestica|Prunus domestica	2	Oleaceae|Rosaceae	2	Lamiales|Rosales
Saturniidae	Saturniinae	Saturniini	Saturnia	Saturnia cephalariae	3	Cephalaria|Knautia|Scabiosa	3	Cephalaria procera|Knautia sp.|Scabiosa sp.	1	Caprifoliaceae	1	Dipsacales	2	Knautia|Sanguisorba	2	Knautia integrifolia|Sanguisorba officinalis	2	Caprifoliaceae|Rosaceae	2	Dipsacales|Rosales
Saturniidae	Saturniinae	Saturniini	Saturnia	Saturnia josephinae	2	Halimium|Helianthemum	2	Halimium halimifolium|Helianthemum	1	Cistaceae	1	Malvales
Saturniidae	Saturniinae	Saturniini	Saturnia	Saturnia pavonia	78	Alchemilla|Alnus|Aruncus|Betula|Calluna|Carpinus|Castanea|Catalpa|Ceanothus|Cercocarpus|Cinnamomum|Citrus|Condalia|Cornus|Corylopsis|Corylus|Cotoneaster|Crataegus|Cycas|Cytisus|Diospyros|Eleutherococcus|Erica|Fagus|Filipendula|Fragaria|Frangula|Fraxinus|Fremontodendron|Genista|Geranium|Ginkgo|Helianthemum|Hippophae|Juglans|Kalopanax|Lespedeza|Liquidambar|Lotus|Lythrum|Malus|Morus|Myrica|Onobrychi…	103	Alchemilla sp.|Alnus sp.|Alnus glutinosa|Alnus incana|Aruncus sp.|Betula sp.|Betula nana|Betula pendula|Betula platyphylla|Betula pubescens|Calluna vulgaris|Carpinus betulus|Ceanothus cordulatus|Ceanothus cuneatus|Ceanothus greggii|Cercocarpus betuloides|Condalia ericoides|Cornus alba|Corylus sp.|Corylus avellana|Cotoneaster|Cotoneaster x suecicus|Crataegus sp.|Crataegus monogyna|Cytisus scopariu…	37	Adoxaceae|Altingiaceae|Anacardiaceae|Apiaceae|Araliaceae|Betulaceae|Bignoniaceae|Cistaceae|Cornaceae|Cycadaceae|Ebenaceae|Elaeagnaceae|Ericaceae|Fabaceae|Fagaceae|Geraniaceae|Ginkgoaceae|Grossulariaceae|Hamamelidaceae|Juglandaceae|Lamiaceae|Lauraceae|Lythraceae|Malvaceae|Melastomataceae|Moraceae|Myricaceae|Oleaceae|Plantaginaceae|Platanaceae|Polygonaceae|Rhamnaceae|Rosaceae|Rutaceae|Salicaceae|Ul…	21	Apiales|Caryophyllales|Cornales|Cycadales|Dipsacales|Ericales|Fabales|Fagales|Geraniales|Ginkgoales|Lamiales|Laurales|Malpighiales|Malvales|Myrtales|Proteales|Rosales|Sapindales|Saxifragales|Zingiberales|	30	Acer|Aesculus|Arbutus|Carpinus|Castanea|Cercis|Condalia|Cornus|Crataegus|Erica|Fraxinus|Humulus|Juglans|Lagerstroemia|Malus|Morus|Platanus|Populus|Prunus|Pyrus|Quercus|Rosa|Rubus|Salix|Sambucus|Schinus|Schleichera|Spiraea|Toxicodendron|Zelkova	41	Acer sp.|Aesculus hippocastanum|Arbutus unedo|Carpinus betulus|Castanea crenata|Castanea japonica|Cercis siliquastrum|Condalia hookeri|Cornus sp.|Crataegus monogyna|Crataegus sp.|Erica sp.|Fraxinus excelsior|Humulus lupulus|Juglans regia|Lagerstroemia indica|Malus pumila|Malus sp.|Morus nigra|Platanus sp.|Populus deltoides|Prunus armeniaca|Prunus cerasus|Prunus domestica|Prunus persica|Prunus ser…	17	Adoxaceae|Anacardiaceae|Betulaceae|Cannabaceae|Cornaceae|Ericaceae|Fabaceae|Fagaceae|Juglandaceae|Lythraceae|Moraceae|Oleaceae|Platanaceae|Rosaceae|Salicaceae|Sapindaceae|Ulmaceae|	11	Ericales|Cornales|Rosales|Lamiales|Fagales|Malpighiales|Dipsacales|Sapindales|Fabales|Proteales|Myrtales
Saturniidae	Saturniinae	Saturniini	Saturnia	Saturnia pavoniella	9	Vaccinium|Betula|Carpinus|Quercus|Frangula|Prunus|Rosa|Rubus|Spiraea	10	Vaccinium|Betula|Carpinus|Quercus|Frangula|Prunus spinosa|Rosa|Rubus|Rubus caesius|Spiraea	5	Betulaceae|Rhamnaceae|Rosaceae|Fagaceae|Ericaceae	3	Fagales|Rosales|Ericales
Saturniidae	Saturniinae	Saturniini	Saturnia	Saturnia pinratanai									1	Ligustrum	1	Ligustrum ovalifolium	1	Oleaceae	1	Lamiales
Saturniidae	Saturniinae	Saturniini	Saturnia	Saturnia pyretorum	21	Liquidambar|Cinnamomum|Camptotheca|Camellia|Ilex|Paulownia|Castanea|Quercus|Juglans|Pterocarya|Sapium|Populus|Eriobotrya|Pyrus|Rosa|Ulmus|Punica|Psidium|Acer|Toxicodendron|Ginkgo	23	Liquidambar formosana|Cinnamomum camphora|Camptotheca acuminata|Camellia oleifera|Ilex chinensis|Paulownia tomentosa|Castanea mollissima|Quercus|Quercus acutissima|Juglans regia|Pterocarya stenoptera|Sapium sebiferum|Populus|Eriobotrya japonica|Pyrus bretschneideri|Pyrus pyrifolia|Rosa multiflora|Ulmus davidiana|Punica granatum|Psidium guajava|Acer|Toxicodendron vernicifluum|Ginkgo biloba	17	Sapindaceae|Theaceae|Nyssaceae|Fagaceae|Lauraceae|Rosaceae|Ginkgoaceae|Aquifoliaceae|Juglandaceae|Altingiaceae|Paulowniaceae|Salicaceae|Myrtaceae|Lythraceae|Euphorbiaceae|Anacardiaceae|Ulmaceae	12	Sapindales|Ericales|Cornales|Fagales|Laurales|Rosales|Ginkgoales|Aquifoliales|Saxifragales|Lamiales|Malpighiales|Myrtales	2	Crataegus|Rosa	2	Crataegus sp.|Rosa sp.	1	Rosaceae	1	Rosales
Saturniidae	Saturniinae	Saturniini	Saturnia	Saturnia pyri	27	Liquidambar|Periploca|Fraxinus|Olea|Syringa|Platanus|Alnus|Betula|Corylus|Castanea|Quercus|Juglans|Pterocarya|Populus|Salix|Morus|Cydonia|Malus|Prunus|Pyrus|Rubus|Ulmus|Tilia|Acer|Pistacia|Aesculus|Vitis	48	Liquidambar styraciflua|Periploca aphylla|Fraxinus|Fraxinus angustifolia|Fraxinus excelsior|Fraxinus syriaca|Olea europaea|Syringa|Platanus|Alnus|Alnus glutinosa|Betula|Corylus|Castanea sativa|Quercus robur|Juglans regia|Pterocarya|Populus|Populus euphratica|Salix|Morus|Morus alba|Cydonia|Malus|Malus domestica|Prunus|Prunus arabica|Prunus avium|Prunus cerasifera|Prunus cerasus|Prunus domestica|Pr…	15	Sapindaceae|Betulaceae|Fagaceae|Rosaceae|Oleaceae|Juglandaceae|Altingiaceae|Moraceae|Apocynaceae|Anacardiaceae|Platanaceae|Salicaceae|Malvaceae|Ulmaceae|Vitaceae	10	Sapindales|Fagales|Rosales|Lamiales|Saxifragales|Gentianales|Proteales|Malpighiales|Malvales|Vitales	7	Ligustrum|Betula|Humulus|Malus|Prunus|Pyrus|Lythrum	12	Ligustrum|Betula|Humulus lupulus|Malus|Malus domestica|Prunus armeniaca|Prunus domestica|Prunus dulcis|Prunus spinosa|Prunus virginiana|Pyrus communis|Lythrum salicaria	5	Betulaceae|Cannabaceae|Oleaceae|Lythraceae|Rosaceae	4	Fagales|Rosales|Lamiales|Myrtales
Saturniidae	Saturniinae	Saturniini	Saturnia	Saturnia roseata									1	Quercus	1	Quercus x hispanica	1	Fagaceae	1	Fagales
Saturniidae	Saturniinae	Saturniini	Saturnia	Saturnia spini	7	Alnus|Populus|Crataegus|Malus|Prunus|Sanguisorba|Ulmus	10	Alnus glutinosa|Populus|Crataegus monogyna|Malus domestica|Malus sylvestris|Prunus domestica|Prunus prostrata|Prunus spinosa|Sanguisorba officinalis|Ulmus minor	4	Betulaceae|Rosaceae|Salicaceae|Ulmaceae	3	Fagales|Rosales|Malpighiales	5	Crataegus|Prunus|Rosa|Rubus|Salix	8	Crataegus|Prunus|Prunus spinosa|Rosa canina|Rubus fruticosus agg.|Salix|Rosa|Salix babylonica	2	Rosaceae|Salicaceae	2	Rosales|Malpighiales
Saturniidae	Ceratocampinae		Schausiella	Schausiella arpi	1	Hymenaea	2	Hymenaea altissima|Hymenaea courbaril	1	Fabaceae	1	Fabales
Saturniidae	Ceratocampinae		Schausiella	Schausiella santarosensis	1	Hymenaea	1	Hymenaea courbaril	1	Fabaceae	1	Fabales
Saturniidae	Ceratocampinae		Schausiella	Schausiella spitzi	2	Hymenaea|Pterodon	2	Hymenaea stigonocarpa|Pterodon emarginatus	1	Fabaceae	1	Fabales	1	Hymenaea	1	Hymenaea courbaril	1	Fabaceae	1	Fabales
Saturniidae	Ceratocampinae		Scolesa	Scolesa totoma	1	Mimosa	1	Mimosa scabrella	1	Fabaceae	1	Fabales
Saturniidae	Saturniinae	Saturniini	Solus	Solus parvifenestrata	3	Malus|Prunus|Ulmus	4	Malus pumila|Prunus mume|Prunus pseudocerasus|Ulmus davidiana	2	Rosaceae|Ulmaceae	1	Rosales
Saturniidae	Saturniinae	Saturniini	Syntherata	Syntherata	1	Eucalyptus	1	Eucalyptus deglupta	1	Myrtaceae	1	Myrtales
Saturniidae	Saturniinae	Saturniini	Syntherata	Syntherata escarlata	5	Planchonia|Neolitsea|Alphitonia|Terminalia|Lophostemon	5	Planchonia careya|Neolitsea australiensis|Alphitonia philippinensis|Terminalia|Lophostemon suaveolens	5	Rhamnaceae|Myrtaceae|Lauraceae|Lecythidaceae|Combretaceae	4	Rosales|Myrtales|Laurales|Ericales
Saturniidae	Saturniinae	Saturniini	Syntherata	Syntherata janetta	16	Aegiceras|Neolitsea|Timonius|Olea|Sassafras|Ricinus|Glochidion|Petalostigma|Ceriops|Terminalia|Psidium|Schinus|Citrus|Geijera|Melicope|Podocarpus	18	Aegiceras corniculatum|Neolitsea australiensis|Neolitsea dealbata|Aegiceras|Timonius timon|Olea europaea|Sassafras|Ricinus communis|Glochidion ferdinandi|Petalostigma quadriloculare|Ceriops tagal|Terminalia|Psidium guajava|Schinus molle|Citrus|Geijera salicifolia|Melicope elleryana|Podocarpus spinulosus	13	Primulaceae|Rhizophoraceae|Rutaceae|Phyllanthaceae|Lauraceae|Oleaceae|Picrodendraceae|Podocarpaceae|Myrtaceae|Euphorbiaceae|Anacardiaceae|Combretaceae|Rubiaceae	8	Ericales|Malpighiales|Sapindales|Laurales|Lamiales|Araucariales|Myrtales|Gentianales	1	Eucalyptus	1	Eucalyptus torelliana	1	Myrtaceae	1	Myrtales
Saturniidae	Saturniinae	Saturniini	Syntherata	Syntherata leonae	12	Polyscias|Cinnamomum|Neolitsea|Darlingia|Ceriops|Rhizophora|Alphitonia|Xanthostemon|Flindersia|Melicope|Zanthoxylum|Dendrophthoe	15	Polyscias elegans|Cinnamomum camphora|Neolitsea brassii|Neolitsea dealbata|Darlingia darlingiana|Ceriops tagal|Rhizophora stylosa|Alphitonia philippinensis|Xanthostemon whitei|Flindersia australis|Flindersia pimenteliana|Flindersia schottiana|Melicope elleryana|Zanthoxylum brachyacanthum|Dendrophthoe	8	Rhamnaceae|Rhizophoraceae|Lauraceae|Proteaceae|Loranthaceae|Rutaceae|Araliaceae|Myrtaceae	8	Rosales|Malpighiales|Laurales|Proteales|Santalales|Sapindales|Apiales|Myrtales	1	Prunus	1	Prunus laurocerasus	1	Rosaceae	1	Rosales
Saturniidae	Saturniinae	Saturniini	Syntherata	Syntherata melvilla	5	Planchonia|Bruguiera|Rhizophora|Flindersia|Ceriops	5	Planchonia careya|Bruguiera|Rhizophora stylosa|Flindersia|Ceriops tagal	3	Rhizophoraceae|Rutaceae|Lecythidaceae	3	Malpighiales|Sapindales|Ericales	1	Planchonia	1	Planchonia careya	1	Lecythidaceae	1	Ericales
Saturniidae	Saturniinae	Saturniini	Syntherata	Syntherata mirata	1	Excoecaria	2	Excoecaria agallocha|Excoecaria parvifolia	1	Euphorbiaceae	1	Malpighiales
Saturniidae	Saturniinae	Saturniini	Syntherata	Syntherata pseudescarlata	3	Planchonia|Alphitonia|Ziziphus	3	Planchonia careya|Alphitonia pomaderroides|Ziziphus timoriensis	2	Rhamnaceae|Lecythidaceae	2	Rosales|Ericales
Saturniidae	Ceratocampinae		Syssphinx		1	Acacia	1	Acacia sp.	1	Fabaceae	1	Fabales
Saturniidae	Ceratocampinae		Syssphinx	Syssphinx albolineata									3	Acacia|Leucaena|Robinia	3	Acacia baileyana|Leucaena pulverulenta|Robinia pseudoacacia	1	Fabaceae	1	Fabales
Saturniidae	Ceratocampinae		Syssphinx	Syssphinx bicolor	2	Gleditsia|Gymnocladus	2	Gleditsia triacanthos|Gymnocladus dioica	1	Fabaceae	1	Fabales	4	Ligustrum|Gleditsia|Robinia|Quercus	4	Ligustrum sp.|Gleditsia triacanthos|Robinia pseudoacacia|Quercus sp.	3	Fabaceae|Oleaceae|Fagaceae	3	Fabales|Lamiales|Fagales
Saturniidae	Ceratocampinae		Syssphinx	Syssphinx bidens									1	Gleditsia	1	Gleditsia triacanthos	1	Fabaceae	1	Fabales
Saturniidae	Ceratocampinae		Syssphinx	Syssphinx bisecta	2	Gleditsia|Gymnocladus	2	Gleditsia triacanthos|Gymnocladus dioica	1	Fabaceae	1	Fabales	1	Gleditsia	1	Gleditsia triacanthos	1	Fabaceae	1	Fabales
Saturniidae	Ceratocampinae		Syssphinx	Syssphinx blanchardi	1	Chloroleucon	1	Chloroleucon ebano	1	Fabaceae	1	Fabales	3	Gleditsia|Acacia|Leucaena	4	Gleditsia triacanthos|Acacia angustissima|Acacia farnesiana|Leucaena pulverulenta	1	Fabaceae	1	Fabales
Saturniidae	Ceratocampinae		Syssphinx	Syssphinx colla	3	Albizia|Samanea|Coulteria	3	Albizia adinocephala|Samanea saman|Coulteria platyloba	1	Fabaceae	1	Fabales	2	Gleditsia|Zapoteca	2	Gleditsia triacanthos|Zapoteca formosa	1	Fabaceae	1	Fabales
Saturniidae	Ceratocampinae		Syssphinx	Syssphinx colla	5	Albizia|Leucaena|Samanea|Senna|Stryphnodendron	5	Albizia adinocephala|Leucaena multicapitula|Samanea saman|Senna pallida|Stryphnodendron microstachyum	1	Fabaceae	1	Fabales
Saturniidae	Ceratocampinae		Syssphinx	Syssphinx digueti									2	Gleditsia|Acacia	2	Gleditsia triacanthos|Acacia baileyana	1	Fabaceae	1	Fabales
Saturniidae	Ceratocampinae		Syssphinx	Syssphinx gomezi									2	Acacia|Robinia	2	Acacia baileyana|Robinia pseudoacacia	1	Fabaceae	1	Fabales
Saturniidae	Ceratocampinae		Syssphinx	Syssphinx heiligbrodti	4	Sarcobatus|Parkinsonia|Prosopis|Larrea	5	Sarcobatus vermiculatus|Parkinsonia florida|Parkinsonia microphylla|Prosopis glandulosa|Larrea divaricata	3	Zygophyllaceae|Fabaceae|Sarcobataceae	3	Zygophyllales|Fabales|Caryophyllales	3	Acacia|Prosopis|Gleditsia	4	Acacia farnesiana|Acacia rigidula|Prosopis sp.|Gleditsia triacanthos	1	Fabaceae	1	Fabales
Saturniidae	Ceratocampinae		Syssphinx	Syssphinx hubbardi	4	Acacia|Prosopis|Parkinsonia|Lysiloma	5	Acacia greggii|Prosopis|Parkinsonia microphylla|Lysiloma microphyllum|Prosopis juliflora	1	Fabaceae	1	Fabales	5	Gleditsia|Acacia|Parkinsonia|Prosopis|Robinia	8	Gleditsia triacanthos|Acacia baileyana|Parkinsonia florida|Parkinsonia microphylla|Prosopis|Acacia|Prosopis juliflora|Robinia pseudoacacia	1	Fabaceae	1	Fabales
Saturniidae	Ceratocampinae		Syssphinx	Syssphinx jennyphillipsae	1	Vachellia	1	Vachellia collinsii	1	Fabaceae	1	Fabales
Saturniidae	Ceratocampinae		Syssphinx	Syssphinx mexicana	1	Acacia	4	Acacia collinsii|Acacia cornigera|Acacia cornigera?|Acacia hindsii	1	Fabaceae	1	Fabales
Saturniidae	Ceratocampinae		Syssphinx	Syssphinx molina	17	Diospyros|Cassia|Senna|Acacia|Albizia|Inga|Pseudosamanea|Samanea|Acosmium|Dalbergia|Erythrina|Gliricidia|Ficus|Schinus|Mimosa|Scutia|Leptolobium	29	Diospyros kaki|Cassia|Cassia fistula|Cassia grandis|Cassia javanica|Senna corymbosa|Acacia|Albizia adinocephala|Albizia lebbeck|Inga|Inga bahiensis|Inga sessilis|Inga uraguensis|Inga vera|Pseudosamanea guachepele|Samanea saman|Acosmium panamense|Dalbergia retusa|Erythrina crista-galli|Gliricidia sepium|Ficus retusa|Schinus|Schinus polygamus|Mimosa|Scutia buxifolia|Inga punctata|Leptolobium paname…	5	Fabaceae|Ebenaceae|Moraceae|Anacardiaceae|Rhamnaceae	4	Fabales|Ericales|Rosales|Sapindales	8	Gleditsia|Senna|Acacia|Inga|Mimosa|Robinia|Salix|Erythrina	11	Gleditsia triacanthos|Senna occidentalis|Senna uniflora|Acacia baileyana|Acacia collinsii|Inga|Inga vera|Mimosa xanti|Robinia pseudoacacia|Salix caprea|Erythrina crista-galli	2	Fabaceae|Salicaceae	2	Fabales|Malpighiales
Saturniidae	Ceratocampinae		Syssphinx	Syssphinx montana	4	Haematoxylum|Senna|Acacia|Mimosa	6	Haematoxylum brasiletto|Senna bicapsularis|Acacia farnesiana|Mimosa dysocarpa|Acacia angustissima|Mimosa aculeaticarpa	1	Fabaceae	1	Fabales	6	Gleditsia|Paraserianthes|Parkinsonia|Acacia|Robinia|Albizia	7	Gleditsia triacanthos|Paraserianthes lophantha|Parkinsonia aculeata|Acacia baileyana|Acacia farnesiana|Robinia pseudoacacia|Albizia	1	Fabaceae	1	Fabales
Saturniidae	Ceratocampinae		Syssphinx	Syssphinx quadrilineata	14	Haematoxylum|Senna|Acacia|Albizia|Calliandra|Leucaena|Lysiloma|Mimosa|Samanea|Sphinga|Senegalia|Entada|Pithecellobium|Schizolobium	21	Haematoxylum brasiletto|Senna pallida|Senna papillosa|Acacia tenuifolia|Albizia adinocephala|Calliandra calothyrsus|Calliandra rubescens|Leucaena multicapitula|Lysiloma aurita|Mimosa pigra|Mimosa xanti|Samanea saman|Sphinga platyloba|Calliandra bijuga|Leucaena multiflora|Senegalia multipinnata|Senna atomaria|Entada gigas|Pithecellobium platylobum|Schizolobium parahyba|Senna reticulata	1	Fabaceae	1	Fabales	2	Acacia|Mimosa	4	Acacia collinsii|Mimosa xanti|Acacia baileyana|Acacia dealbata	1	Fabaceae	1	Fabales
Saturniidae	Ceratocampinae		Syssphinx	Syssphinx raspa	1	Acacia	1	Acacia angustissima	1	Fabaceae	1	Fabales	2	Paraserianthes|Acacia	2	Paraserianthes lophantha|Acacia angustissima	1	Fabaceae	1	Fabales
Saturniidae	Saturniinae	Urotini	Tagoropsis	Tagoropsis flavinata	1	Allophylus	4	Allophylus africanus|Allophylus dregeanus|Allophylus natalensis|Allophylus subcoreaceus	1	Sapindaceae	1	Sapindales	1	Allophylus	2	Allophylus africanus|Allophylus natalensis	1	Sapindaceae	1	Sapindales
Saturniidae	Saturniinae	Urotini	Tagoropsis	Tagoropsis hanningtoni	1	Allophylus	1	Allophylus africanus	1	Sapindaceae	1	Sapindales
Saturniidae	Saturniinae	Urotini	Tagoropsiella	Tagoropsiella ikondae	1	Allophylus	1	Allophylus sp.	1	Sapindaceae	1	Sapindales
Saturniidae	Oxyteninae		Therinia	Therinia geometraria	1	Uncaria	1	Uncaria guianensis	1	Rubiaceae	1	Gentianales
Saturniidae	Oxyteninae		Therinia	Therinia transversaria	10	Calycophyllum|Warszewiczia|Arachnothryx|Chimarrhis|Chione|Guettarda|Pentagonia|Randia|Sabicea|Uncaria	11	Calycophyllum candidissimum|Warszewiczia coccinea|Arachnothryx costaricensis|Chimarrhis parviflora|Chione venosa|Guettarda foliacea|Guettarda macrosperma|Pentagonia donnell-smithii|Randia genipoides|Sabicea panamensis|Uncaria tomentosa	1	Rubiaceae	1	Gentianales
Saturniidae	Arsenurinae	Arsenurini	Titaea	Titaea lemoulti									2	Chorisia|Brachychiton	2	Chorisia speciosa|Brachychiton populneus	1	Malvaceae	1	Malvales
Saturniidae	Arsenurinae	Arsenurini	Titaea	Titaea orsinome	1	Eriotheca	1	Eriotheca gracilipes	1	Malvaceae	1	Malvales
Saturniidae	Arsenurinae	Arsenurini	Titaea	Titaea tamerlan	3	Bombax|Pachira|Goethalsia	4	Bombax|Pachira aquatica|Pachira quinata|Goethalsia meiantha	1	Malvaceae	1	Malvales	4	Chorisia|Brachychiton|Ceiba|Tilia	5	Chorisia speciosa|Brachychiton populneus|Ceiba pentandra|Chorisia|Tilia platyphyllos	1	Malvaceae	1	Malvales
Saturniidae	Hemileucinae	Hemileucini	Travassosula	Travassosula subfumata	1	Psidium	1	Psidium guajava	1	Myrtaceae	1	Myrtales
Saturniidae	Saturniinae	Urotini	Urota	Urota sinope	3	Erythrina|Eucalyptus|Sclerocarya	5	Erythrina abyssinica|Erythrina caffra|Erythrina lysistemon|Eucalyptus|Sclerocarya birrea	3	Fabaceae|Myrtaceae|Anacardiaceae	3	Fabales|Myrtales|Sapindales	2	Laburnum|Robinia	2	Laburnum anagyroides|Robinia pseudoacacia	1	Fabaceae	1	Fabales
Saturniidae	Saturniinae	Urotini	Usta	Usta terpsichore	4	Sclerocarya|Commiphora|Melia|Schinus	5	Sclerocarya birrea|Commiphora|Commiphora woodii|Melia azedarach|Schinus molle	3	Burseraceae|Meliaceae|Anacardiaceae	1	Sapindales	2	Schinus|Melia	2	Schinus terebinthifolius|Melia azedarach	2	Meliaceae|Anacardiaceae	1	Sapindales
Saturniidae	Saturniinae	Urotini	Usta	Usta wallengrenii	2	Schotia|Commiphora	8	Schotia brachypetala|Commiphora africana|Commiphora angolensis|Commiphora glandulosa|Commiphora glaucescens|Commiphora saxicola|Commiphora tenuipetiolata|Commiphora virgata	2	Burseraceae|Fabaceae	2	Sapindales|Fabales
Saturniidae	Saturniinae	Micragonini	Vegetia	Vegetia ducalis	2	Eriocephalus|Eriosema	3	Eriocephalus africanus|Eriocephalus microcephalus|Eriosema sp.	2	Asteraceae|Fabaceae	2	Asterales|Fabales\Family\""	1	Artemisia	1	Artemisia californica	1	Asteraceae	1	Asterales
Sphingidae	Sphinginae	Sphingini	Acherontia		2	Olea|Debregeasia	2	Olea sp.|Debregeasia orientalis	2	Urticaceae|Oleaceae	2	Rosales|Lamiales
Sphingidae	Sphinginae	Sphingini	Acherontia	Acherontia atropos	102	Cornus|Philadelphus|Cussonia|Anethum|Daucus|Acanthospermum|Blumea|Cynara|Erigeron|Vernonia|Xanthium|Sambucus|Lonicera|Symphoricarpos|Nerium|Coptosperma|Rubia|Asystasia|Barleria|Bignonia|Catalpa|Jacaranda|Kigelia|Millingtonia|Newbouldia|Pandorea|Podranea|Spathodea|Tabebuia|Tecoma|Buddleja|Nuxia|Hoslundia|Pogostemon|Salvia|Solenostemon|Teucrium|Fraxinus|Jasminum|Ligustrum|Olea|Phillyrea|Schrebera|S…	208	Cornus sanguinea|Philadelphus|Philadelphus coronarius|Cussonia djalonensis|Cussonia spicata|Anethum|Daucus carota|Acanthospermum hispidum|Blumea alata|Cynara scolymus|Erigeron canadensis|Vernonia glabra|Xanthium spinosum|Sambucus nigra|Lonicera caprifolium|Lonicera xylosteum|Symphoricarpos racemosus|Nerium|Nerium oleander|Coptosperma borbonicum|Rubia tinctorum|Asystasia gangetica|Barleria lupulin…	40	Asteraceae|Zingiberaceae|Verbenaceae|Apiaceae|Acanthaceae|Solanaceae|Amaranthaceae|Bignoniaceae|Brassicaceae|Scrophulariaceae|Annonaceae|Cannabaceae|Sapindaceae|Rutaceae|Lamiaceae|Rubiaceae|Boraginaceae|Cornaceae|Cucurbitaceae|Araliaceae|Fabaceae|Boraginaceae |Celastraceae|Rosaceae|Oleaceae|Malvaceae|Convolvulaceae|Juglandaceae|Caprifoliaceae|Moraceae|Apocynaceae|Stilbaceae|Paulowniaceae|Hydrange…	21	Asterales|Zingiberales|Lamiales|Apiales|Solanales|Caryophyllales|Brassicales|Magnoliales|Rosales|Sapindales|Gentianales|Boraginales|Cornales|Cucurbitales|Fabales|Celastrales|Malvales|Fagales|Dipsacales|Vitales|Zygophyllales	11	Jasminum|Ligustrum|Syringa|Verbena|Ipomoea|Capsicum|Lycium|Nicotiana|Solanum|Euonymus|Cannabis	18	Jasminum officinale|Ligustrum ovalifolium|Ligustrum vulgare|Syringa vulgaris|Verbena|Ipomoea batatas|Capsicum annuum|Lycium|Lycium barbarum|Nicotiana glauca|Solanum capsicastrum|Solanum lycopersicum|Solanum melongena|Solanum nigrum|Solanum pseudocapsicum|Solanum tuberosum|Euonymus europaeus|Cannabis sativa	6	Cannabaceae|Solanaceae|Celastraceae|Convolvulaceae|Oleaceae|Verbenaceae	4	Rosales|Solanales|Celastrales|Lamiales
Sphingidae	Sphinginae	Sphingini	Acherontia	Acherontia lachesis	76	Helianthus|Sigesbeckia|Scaevola|Viburnum|Gardenia|Mussaenda|Barleria|Sanchezia|Strobilanthes|Thunbergia|Campsis|Catalpa|Crescentia|Podranea|Spathodea|Stereospermum|Buddleja|Anisomeles|Colebrookea|Pogostemon|Solenostemon|Jasminum|Ligustrum|Osmanthus|Sesamum|Scrophularia|Callicarpa|Clerodendrum|Duranta|Gmelina|Lantana|Nyctanthes|Stachytarpheta|Tectona|Verbena|Vitex|Ipomoea|Merremia|Capsicum|Datura|…	150	Helianthus|Helianthus annuus|Helianthus tuberosus|Sigesbeckia orientalis|Scaevola sericea|Viburnum|Gardenia jasminoides|Mussaenda|Mussaenda frondosa|Mussaenda parviflora|Barleria cristata|Barleria prionitis|Sanchezia oblonga|Strobilanthes callosus|Thunbergia laurifolia|Campsis grandiflora|Catalpa ovata|Crescentia cujete|Podranea ricasoliana|Spathodea campanulata|Stereospermum|Buddleja asiatica|An…	29	Lamiaceae|Annonaceae|Phyllanthaceae|Acanthaceae|Urticaceae|Scrophulariaceae|Fabaceae|Bignoniaceae|Cannaceae|Cannabaceae|Solanaceae|Boraginaceae|Verbenaceae|Boraginaceae |Zingiberaceae|Malvaceae|Rubiaceae|Asteraceae|Convolvulaceae|Oleaceae|Lythraceae|Cucurbitaceae|Meliaceae|Moraceae|Achariaceae|Asparagaceae|Goodeniaceae|Pedaliaceae|Adoxaceae	16	Lamiales|Magnoliales|Malpighiales|Rosales|Fabales|Zingiberales|Solanales|Boraginales|Malvales|Gentianales|Asterales|Myrtales|Cucurbitales|Sapindales|Asparagales|Dipsacales
Sphingidae	Sphinginae	Sphingini	Acherontia	Acherontia styx	48	Pluchea|Nerium|Rauvolfia|Gardenia|Barleria|Colea|Millingtonia|Pyrostegia|Spathodea|Stereospermum|Tecoma|Anisomeles|Solenostemon|Jasminum|Syringa|Nyctanthes|Sesamum|Citharexylum|Clerodendrum|Duranta|Lantana|Stachytarpheta|Tectona|Vitex|Ipomoea|Porana|Datura|Nicotiana|Solanum|Withania|Coccinia|Cucurbita|Erythrina|Lablab|Phaseolus|Pisum|Psophocarpus|Vigna|Syzygium|Ligustrum|Paulownia|Capsicum|Physal…	94	Pluchea indica|Nerium oleander|Rauvolfia serpentina|Gardenia jasminoides|Barleria lupulina|Colea|Millingtonia hortensis|Pyrostegia venusta|Spathodea|Spathodea campanulata|Stereospermum chelonoides|Tecoma capensis|Tecoma stans|Anisomeles indica|Solenostemon esquirolii|Jasminum|Jasminum arborescens|Jasminum flexile|Jasminum sambac|Syringa|Syringa persica|Nyctanthes arbor-tristis|Sesamum indicum|Cit…	15	Lamiaceae|Acanthaceae|Bignoniaceae|Solanaceae|Verbenaceae|Cucurbitaceae|Fabaceae|Myrtaceae|Rubiaceae|Convolvulaceae|Oleaceae|Apocynaceae|Paulowniaceae|Asteraceae|Pedaliaceae	7	Lamiales|Solanales|Cucurbitales|Fabales|Myrtales|Gentianales|Asterales	2	Ligustrum|Sesamum	4	Ligustrum sp.|Ligustrum ovalifolium|Ligustrum vulgare|Sesamum indicum	2	Oleaceae|Pedaliaceae	1	Lamiales
Sphingidae	Macroglossinae	Macroglossini	Acosmerycoides	Acosmerycoides harterti	2	Ampelopsis|Vitis	4	Ampelopsis cantoniensis|Vitis|Vitis vinifera|Vitis cantoniensis	1	Vitaceae	1	Vitales
Sphingidae	Macroglossinae	Macroglossini	Acosmeryx	Acosmeryx akanshi	3	Dillenia|Leea|Vitis	3	Dillenia pentagyna|Leea sp.|Vitis sp.	3	Dilleniaceae|Vitaceae|Vitaceae	2	Dilleniales|Vitales
Sphingidae	Macroglossinae	Macroglossini	Acosmeryx	Acosmeryx anceus	6	Cayratia|Cissus|Vitis|Leea|Ampelocissus|Parthenocissus	12	Cayratia clematidea|Cissus antarctica|Cissus oblonga|Vitis vinifera|Leea guineensis|Ampelocissus indica|Cissus|Parthenocissus|Vitis|Vitis lanceolaria|Leea sp.|Vitis spp.	2	Vitaceae|Vitaceae	1	Vitales
Sphingidae	Macroglossinae	Macroglossini	Acosmeryx	Acosmeryx castanea	6	Hydrangea|Actinidia|Ampelopsis|Cayratia|Parthenocissus|Vitis	8	Hydrangea paniculata|Actinidia callosa|Actinidia fulvicoma|Ampelopsis brevipedunculata|Cayratia japonica|Parthenocissus tricuspidata|Vitis|Vitis vinifera	3	Actinidiaceae|Vitaceae|Hydrangeaceae	3	Ericales|Vitales|Cornales
Sphingidae	Macroglossinae	Macroglossini	Acosmeryx	Acosmeryx formosana	1	Vitis	1	Vitis sp.	1	Vitaceae	1	Vitales
Sphingidae	Macroglossinae	Macroglossini	Acosmeryx	Acosmeryx miskini	1	Cayratia	1	Cayratia clematidea	1	Vitaceae	1	Vitales
Sphingidae	Macroglossinae	Macroglossini	Acosmeryx	Acosmeryx naga	6	Ampelopsis|Vitis|Actinidia|Saurauia|Cayratia|Parthenocissus	17	Ampelopsis vitifolia|Vitis hissarica|Vitis vinifera|Actinidia|Actinidia fulvicoma|Saurauia|Saurauia tristyla|Ampelopsis brevipedunculata|Cayratia japonica|Parthenocissus quinquefolia|Vitis|Vitis himalayana|Actinidia arguta|Ampelopsis humulifolia|Parthenocissus tricuspidata|Vitis spp.|Saurauia spp.	2	Actinidiaceae|Vitaceae	2	Ericales|Vitales
Sphingidae	Macroglossinae	Macroglossini	Acosmeryx	Acosmeryx pseudomissa	2	Actinidia|Ampelopsis	2	Actinidia sp.|Ampelopsis cantoniensis	2	Actinidiaceae|Vitaceae	2	Ericales|Vitales
Sphingidae	Macroglossinae	Macroglossini	Acosmeryx	Acosmeryx pseudonaga	5	Leea|Cayratia|Cissus|Vitis|Tetrastigma	6	Leea guineensis|Leea indica|Cayratia trifolia|Cissus verticillata|Vitis sp.|Tetrastigma sp.	2	Vitaceae|Vitaceae	1	Vitales
Sphingidae	Macroglossinae	Macroglossini	Acosmeryx	Acosmeryx sericeus	4	Actinidia|Leea|Vitis|Ampelopsis	8	Actinidia arguta|Leea indica|Vitis vinifera|Actinidia callosa|Actinidia fulvicoma|Ampelopsis cantoniensis|Ampelopsis heterophylla|Vitis cantoniensis	3	Actinidiaceae|Vitaceae|Vitaceae	2	Ericales|Vitales
Sphingidae	Macroglossinae	Macroglossini	Acosmeryx	Acosmeryx shervillii	9	Cissus|Parthenocissus|Vitis|Dillenia|Actinidia|Leea|Cayratia|Tetrastigma|Columella	13	Cissus sp.|Parthenocissus sp.|Vitis sp.|Dillenia sp.|Actinidia arguta|Leea guineensis|Leea indica|Cayratia trifolia|Cissus verticillata|Tetrastigma lanceolarium|Vitis vinifera|Cissus sycioides|Leea sambucina	3	Actinidiaceae|Vitaceae|Dilleniaceae	3	Ericales|Vitales|Dilleniales
Sphingidae	Macroglossinae	Macroglossini	Acosmeryx	Acosmeryx socrates	4	Cissus|Dillenia|Leea|Vitis	5	Cissus acida|Cissus pedata|Dillenia pentagyna|Leea sp.|Vitis spp.	3	Vitaceae|Dilleniaceae|Vitaceae	2	Vitales|Dilleniales
Sphingidae	Smerinthinae	Ambulycini	Adhemarius	Adhemarius daphne	5	Ocotea|Persea|Nectandra|Cinnamomum|Licaria	20	Ocotea|Ocotea veraguensis|Persea americana|Persea povedae|Ocotea dendrodaphne|Ocotea whitei|Ocotea hartshorniana|Ocotea atirrensis|Ocotea leucoxylon|Ocotea nicaraguensis|Ocotea paulii|Ocotea insularis|Ocotea tenera|Ocotea mollifolia|Ocotea cernua|Nectandra salicifoia|Nectandra smithii|Cinnamomum triplinerve|Licaria brenesii|Nectandra salicifolia	1	Lauraceae	1	Laurales
Sphingidae	Smerinthinae	Ambulycini	Adhemarius	Adhemarius fulvescens	3	Nectandra|Ocotea|Persea	7	Nectandra salicina|Ocotea dendrodaphne|Ocotea veraguensis|Persea americana|Nectandra salicifolia|Ocotea hartshorniana|Ocotea mollifolia	1	Lauraceae	1	Laurales
Sphingidae	Smerinthinae	Ambulycini	Adhemarius	Adhemarius gannascus	1	Ocotea	1	Ocotea sp.	1	Lauraceae	1	Laurales	2	Persea|Ulmus	2	Persea americana|Ulmus pumila	2	Lauraceae|Ulmaceae	2	Laurales|Rosales
Sphingidae	Smerinthinae	Ambulycini	Adhemarius	Adhemarius palmeri									1	Ulmus	1	Ulmus pumila	1	Ulmaceae	1	Rosales
Sphingidae	Smerinthinae	Ambulycini	Adhemarius	Adhemarius ypsilon	5	Cinnamomum|Licaria|Nectandra|Ocotea|Persea	25	Cinnamomum triplinerve|Licaria|Licaria brenesii|Nectandra salicifolia|Ocotea|Ocotea atirrensis|Ocotea cernua|Ocotea dendrodaphne|Ocotea insularis|Ocotea mollifolia|Ocotea nicaraguensis|Ocotea tenera|Ocotea veraguensis|Persea americana|Nectandra salicina|Ocotea whitei|Ocoea nicaraguensis|Ocoea hartshorniana|Nectandra smithii|Nectandra umbrosa|Ocotea hartshorniana|Ocotea leucoxylon|Ocotea paulii|Oc…	1	Lauraceae	1	Laurales
Sphingidae	Macroglossinae	Dilophonotini	Aellopos	Aellopos ceculus	2	Sabicea|Uncaria	5	Sabicea aspera|Sabicea panamensis|Sabicea villosa|Uncaria guianensis|Sabicea brasiliensis	1	Rubiaceae	1	Gentianales
Sphingidae	Macroglossinae	Dilophonotini	Aellopos	Aellopos clavipes	3	Genipa|Guettarda|Randia	8	Genipa americana|Guettarda macrosperma|Randia aculeata|Randia monantha|Randia rhagocarpa|Randia micracantha|Randia obchordata|Randia genipoides	1	Rubiaceae	1	Gentianales
Sphingidae	Macroglossinae	Dilophonotini	Aellopos	Aellopos fadus	7	Genipa|Alibertia|Augusta|Randia|Amaioua|Calycophyllum|Guettarda	10	Genipa americana|Alibertia edulis|Augusta rivalis|Randia|Randia grandifolia|Genipa sp.|Amaioua pedicellata|Calycophyllum candidissimum|Guettarda macrosperma|Randia monantha	1	Rubiaceae	1	Gentianales
Sphingidae	Macroglossinae	Dilophonotini	Aellopos	Aellopos tantalus	4	Ixora|Casasia|Randia|Conocarpus	5	Ixora venulosa|Casasia clusiifolia|Randia aculeata|Conocarpus erectus|Conocarpus erecta	2	Rubiaceae|Combretaceae	2	Gentianales|Myrtales
Sphingidae	Macroglossinae	Dilophonotini	Aellopos	Aellopos titan	7	Alibertia|Genipa|Randia|Chomelia|Guettarda|Ixora|Buddleja	17	Alibertia|Genipa|Genipa americana|Randia|Alibertia edulis|Chomelia spinosa|Guettarda macrosperma|Ixora venulosa|Randia aculeata|Randia formosa|Randia grandifolia|Randia monantha|Buddleja davidii|Randia rhagocarpa|Randia armata|Randia pittieri|Randia thurberi	2	Rubiaceae|Scrophulariaceae	2	Gentianales|Lamiales	1	Cephalanthus	1	Cephalanthus occidentalis	1	Rubiaceae	1	Gentianales
Sphingidae	Smerinthinae	Leucophlebiini	Afroclanis	Afroclanis calcareus	1	Pterocarpus	1	Pterocarpus rotundifolius	1	Fabaceae	1	Fabales
Sphingidae	Smerinthinae	Incertae Sedis	Agnosia	Agnosia microta	1	Anogeissus	1	Anogeissus latifolia	1	Combretaceae	1	Myrtales
Sphingidae	Smerinthinae	Incertae Sedis	Agnosia	Agnosia orneus	1	Grewia	2	Grewia asiatica|Grewia tiliaefolia	1	Malvaceae	1	Malvales
Sphingidae	Sphinginae	Sphingini	Agrius	Agrius cingulata	11	Helianthus|Xanthium|Convolvulus|Ipomoea|Merremia|Stictocardia|Datura|Nicotiana|Solanum|Asimina|Turbina	34	Helianthus annuus|Xanthium|Convolvulus|Convolvulus nodiflorus|Ipomoea|Ipomoea alba|Ipomoea batatas|Ipomoea batatoides|Ipomoea carnea|Ipomoea habeliana|Ipomoea indica|Ipomoea nil|Ipomoea pes-caprae|Ipomoea purpurea|Ipomoea speciosa|Ipomoea trifida|Ipomoea triloba|Ipomoea tuberculata|Ipomoea x leucantha|Merremia cissoides|Merremia dissecta|Merremia tuberosa|Merremia umbellata|Stictocardia tiliifoli…	4	Annonaceae|Convolvulaceae|Solanaceae|Asteraceae	3	Magnoliales|Solanales|Asterales	1	Ipomoea	1	Ipomoea batatas	1	Convolvulaceae	1	Solanales
Sphingidae	Sphinginae	Sphingini	Agrius	Agrius convolvuli	51	Chrysanthemum|Helianthus|Sarcocephalus|Tabebuia|Basilicum|Hoslundia|Ocimum|Antirrhinum|Clerodendrum|Duranta|Tectona|Vitex|Calystegia|Convolvulus|Ipomoea|Jacquemontia|Lepistemon|Merremia|Porana|Stictocardia|Turbina|Xenostegia|Petunia|Solanum|Tetragonia|Mirabilis|Polygonum|Rumex|Portulaca|Alocasia|Colocasia|Arachis|Canavalia|Clitoria|Glycine|Lablab|Phaseolus|Vigna|Euphorbia|Linum|Passiflora|Kerria|…	110	Chrysanthemum|Helianthus|Helianthus annuus|Helianthus tuberosus|Sarcocephalus latifolius|Tabebuia pallida|Basilicum polystachyon|Hoslundia opposita|Ocimum basilicum|Ocimum gratissimum|Antirrhinum|Clerodendrum japonicum|Duranta erecta|Tectona grandis|Vitex doniana|Calystegia hederacea|Calystegia pubescens|Calystegia sepium|Convolvulus|Convolvulus althaeoides|Convolvulus arvensis|Convolvulus tricol…	23	Malvaceae|Araceae|Plantaginaceae|Fabaceae|Lamiaceae|Convolvulaceae|Asteraceae|Melastomataceae|Verbenaceae|Euphorbiaceae|Balsaminaceae|Rosaceae|Linaceae|Nyctaginaceae|Rubiaceae|Bignoniaceae|Passifloraceae|Solanaceae|Polygonaceae|Portulacaceae|Aizoaceae|Vitaceae|Zygophyllaceae	14	Malvales|Alismatales|Lamiales|Fabales|Solanales|Asterales|Myrtales|Malpighiales|Ericales|Rosales|Caryophyllales|Gentianales|Vitales|Zygophyllales	8	Newbouldia|Calystegia|Convolvulus|Ipomoea|Aristolochia|Urena|Citrus|Cichorium	14	Newbouldia laevis|Calystegia|Convolvulus arvensis|Ipomoea aquatica|Ipomoea batatas|Ipomoea cairica|Ipomoea carnea|Ipomoea indica|Aristolochia acuminata|Urena lobata|Citrus medica|Cichorium endivia|Calystegia sepium|Ipomoea	6	Aristolochiaceae|Convolvulaceae|Asteraceae|Rutaceae|Bignoniaceae|Malvaceae	6	Piperales|Solanales|Asterales|Sapindales|Lamiales|Malvales
Sphingidae	Sphinginae	Sphingini	Agrius	Agrius cordiae	1	Cordia	1	Cordia sp.	1	Boraginaceae	1	Boraginales
Sphingidae	Sphinginae	Sphingini	Agrius	Agrius godarti	1	Ipomoea	1	Ipomoea batatas	1	Convolvulaceae	1	Solanales	1	Ipomoea	1	Ipomoea batatas	1	Convolvulaceae	1	Solanales
Sphingidae	Smerinthinae	Ambulycini	Akbesia	Akbesia davidi	1	Pistacia	3	Pistacia sp.|Pistacia atlantica|Pistacia terebinthus	1	Anacardiaceae	1	Sapindales	3	Cotinus|Pistacia|Rhus	3	Cotinus coggygria|Pistacia sp.|Rhus coriaria	1	Anacardiaceae	1	Sapindales
Sphingidae	Macroglossinae	Dilophonotini	Aleuron	Aleuron carinata	2	Doliocarpus|Davilla	3	Doliocarpus dentatus|Doliocarpus multiflorus|Davilla nitida	1	Dilleniaceae	1	Dilleniales
Sphingidae	Macroglossinae	Dilophonotini	Aleuron	Aleuron chloroptera	5	Curatella|Davilla|Doliocarpus|Tetracera|Palicourea	9	Curatella americana|Davilla kunthii|Davilla nitida|Doliocarpus dentatus|Tetracera hydrophila|Tetracera volubilis|Doliocarpus multiflorus|Palicourea guianensis|Palicourea guianensis	2	Dilleniaceae|Rubiaceae	2	Dilleniales|Gentianales	1	Davilla	1	Davilla nitida	1	Dilleniaceae	1	Dilleniales
Sphingidae	Macroglossinae	Dilophonotini	Aleuron	Aleuron iphis	4	Curatella|Davilla|Doliocarpus|Tetracera	9	Curatella americana|Davilla|Davilla kunthii|Davilla nitida|Doliocarpus dentatus|Tetracera hydrophila|Tetracera volubilis|Davilla sp.|Doliocarpus multiflorus	1	Dilleniaceae	1	Dilleniales
Sphingidae	Macroglossinae	Dilophonotini	Aleuron	Aleuron neglectum	3	Davilla|Tetracera|Doliocarpus	8	Davilla|Davilla kunthii|Tetracera volubilis|Davilla nitida|Davilla sp.|Davilla rugosa|Doliocarpus multiflorus|Tetracera hydrophila	1	Dilleniaceae	1	Dilleniales	1	Davilla	2	Davilla nitida|Davilla rugosa	1	Dilleniaceae	1	Dilleniales
Sphingidae	Smerinthinae	Ambulycini	Ambulyx		2	Liquidambar|Shorea	2	Liquidambar sp.|Shorea robusta	2	Altingiaceae|Dipterocarpaceae	2	Saxifragales|Malvales
Sphingidae	Smerinthinae	Ambulycini	Ambulyx	Ambulyx aglaia	1	Aglaia	1	Aglaia littoralis	1	Meliaceae	1	Sapindales
Sphingidae	Smerinthinae	Ambulycini	Ambulyx	Ambulyx auripennis	1	Dipterocarpus	1	Dipterocarpus	1	Dipterocarpaceae	1	Malvales
Sphingidae	Smerinthinae	Ambulycini	Ambulyx	Ambulyx belli	1	Xylia	1	Xylia xylocarpa	1	Fabaceae	1	Fabales
Sphingidae	Smerinthinae	Ambulycini	Ambulyx	Ambulyx canescens	3	Dipterocarpus|Dryobalanops|Shorea	4	Dipterocarpus|Dryobalanops lanceolata|Shorea lepidota|Shorea macroptera	1	Dipterocarpaceae	1	Malvales
Sphingidae	Smerinthinae	Ambulycini	Ambulyx	Ambulyx cyclasticta	1	Shorea	1	Shorea siamensis	1	Dipterocarpaceae	1	Malvales
Sphingidae	Smerinthinae	Ambulycini	Ambulyx	Ambulyx japonica	3	Carpinus|Acer|Juglans	4	Carpinus japonica|Acer|Juglans|Acer palmatum	3	Sapindaceae|Betulaceae|Juglandaceae	2	Sapindales|Fagales	1	Carpinus	2	Carpinus laxiflora|Carpinus tschonoskii	1	Betulaceae	1	Fagales
Sphingidae	Smerinthinae	Ambulycini	Ambulyx	Ambulyx kuangtungensis	1	Choerospondias	1	Choerospondias axillaris	1	Anacardiaceae	1	Sapindales
Sphingidae	Smerinthinae	Ambulycini	Ambulyx	Ambulyx liturata	10	Castanea|Castanopsis|Quercus|Juglans|Shorea|Choerospondias|Canarium|Aphanamixis|Poupartia|Spondias	17	Castanea mollissima|Castanopsis concinna|Castanopsis hystrix|Castanopsis jucunda|Castanopsis tribuloides|Quercus acutissima|Quercus cuspidata|Quercus glauca|Juglans regia|Shorea robusta|Choerospondias axillaris|Canarium album|Aphanamixis polystachya|Poupartia fordii|Spondias axillaris|Quercus castanopsis|Castanopsis sp.	6	Meliaceae|Burseraceae|Fagaceae|Anacardiaceae|Juglandaceae|Dipterocarpaceae	3	Sapindales|Fagales|Malvales
Sphingidae	Smerinthinae	Ambulycini	Ambulyx	Ambulyx matti	1	Terminalia	1	Terminalia tomentosa	1	Combretaceae	1	Myrtales
Sphingidae	Smerinthinae	Ambulycini	Ambulyx	Ambulyx moorei	5	Myrica|Buchanania|Lannea|Mangifera|Canarium	11	Myrica rubra|Buchanania latifolia|Lannea coromandelica|Mangifera|Canarium album|Canarium indicum|Canarium pimela|Lannea coromandelica |Lannea grandis|Canarium commune|Canarium sp.	3	Anacardiaceae|Burseraceae|Myricaceae	2	Sapindales|Fagales
Sphingidae	Smerinthinae	Ambulycini	Ambulyx	Ambulyx ochracea	9	Quercus|Juglans|Acer|Choerospondias|Rhus|Boswellia|Melia|Poupartia|Spondias	11	Quercus acutissima|Juglans ailanthifolia|Juglans regia|Acer palmatum|Choerospondias axillaris|Rhus chinensis|Rhus javanica|Boswellia|Melia|Poupartia fordii|Spondias axillaris	6	Sapindaceae|Burseraceae|Anacardiaceae|Juglandaceae|Meliaceae|Fagaceae	2	Sapindales|Fagales
Sphingidae	Smerinthinae	Ambulycini	Ambulyx	Ambulyx pryeri	1	Lagerstroemia	1	Lagerstroemia floribunda	1	Lythraceae	1	Myrtales
Sphingidae	Smerinthinae	Ambulycini	Ambulyx	Ambulyx schauffelbergeri	6	Castanea|Quercus|Juglans|Pterocarya|Salix|Acer	8	Castanea mollissima|Quercus acutissima|Juglans mandshurica|Pterocarya rhoifolia|Pterocarya stenoptera|Salix babylonica|Acer palmatum|Juglans regia	4	Sapindaceae|Fagaceae|Juglandaceae|Salicaceae	3	Sapindales|Fagales|Malpighiales
Sphingidae	Smerinthinae	Ambulycini	Ambulyx	Ambulyx sericeipennis	13	Xylia|Buchanania|Myrica|Schima|Quercus|Juglans|Elaeocarpus|Alnus|Betula|Engelhardtia|Toxicodendron|Nageia|Rhus	18	Xylia xylocarpa|Buchanania latifolia|Myrica|Schima noronhae|Quercus glauca|Juglans regia|Myrica rubra|Elaeocarpus chinensis|Alnus japonica|Betula alnoides|Engelhardtia spicata|Juglans ailanthifolia|Toxicodendron hookeri|Toxicodendron vernicifluum|Nageia nagi|Rhus insignis|Myrica nagi|Quercus sp.	9	Betulaceae|Anacardiaceae|Elaeocarpaceae|Juglandaceae|Myricaceae|Podocarpaceae|Fagaceae|Theaceae|Fabaceae	6	Fagales|Sapindales|Oxalidales|Araucariales|Ericales|Fabales	1	Juglans	1	Juglans regia	1	Juglandaceae	1	Fagales
Sphingidae	Smerinthinae	Ambulycini	Ambulyx	Ambulyx siamensis	1	Shorea	1	Shorea obtusa	1	Dipterocarpaceae	1	Malvales
Sphingidae	Smerinthinae	Ambulycini	Ambulyx	Ambulyx substrigilis	2	Dipterocarpus|Aglaia	2	Dipterocarpus tuberculatus|Aglaia littoralis	2	Meliaceae|Dipterocarpaceae	2	Sapindales|Malvales
Sphingidae	Smerinthinae	Ambulycini	Ambulyx	Ambulyx tenimberi									2	Tilia|Acer	2	Tilia sp.|Acer palmatum	2	Sapindaceae|Malvaceae	2	Sapindales|Malvales
Sphingidae	Smerinthinae	Ambulycini	Ambulyx	Ambulyx tobii	3	Juglans|Choerospondias|Toxicodendron	3	Juglans mandshurica|Choerospondias axillaris|Toxicodendron orientale	2	Anacardiaceae|Juglandaceae	2	Sapindales|Fagales
Sphingidae	Smerinthinae	Mimatini	Amorpha	Amorpha juglandis	7	Ostrya|Fagus|Carya|Juglans|Betula|Corylus|Alnus	18	Ostrya virginiana|Fagus|Fagus grandifolia|Carya|Carya alba|Carya cordiformis|Carya illinoinensis|Carya tomentosa|Juglans alba|Juglans cinerea|Juglans nigra|Betula|Juglans sp.|Carya sp.|Betula sp.|Corylus sp.|Alnus sp.|Fagus sp.	3	Betulaceae|Juglandaceae|Fagaceae	1	Fagales	6	Alnus|Carpinus|Corylus|Ostrya|Fagus|Juglans	8	Alnus|Carpinus|Corylus|Ostrya|Ostrya virginiana|Fagus|Juglans cinerea|Juglans regia	3	Betulaceae|Fagaceae|Juglandaceae	1	Fagales
Sphingidae	Macroglossinae	Macroglossini	Ampelophaga	Ampelophaga khasiana	2	Saurauia|Vitis	4	Saurauia napaulensis|Vitis|Saurauia nepalensis|Vitis spp.	2	Actinidiaceae|Vitaceae	2	Ericales|Vitales
Sphingidae	Macroglossinae	Macroglossini	Ampelophaga	Ampelophaga rubiginosa	7	Hydrangea|Ampelopsis|Parthenocissus|Vitis|Actinidia|Saurauia|Cayratia	17	Hydrangea involucrata|Ampelopsis|Ampelopsis brevipedunculata|Parthenocissus|Parthenocissus tricuspidata|Vitis|Vitis amurensis|Vitis coignetiae|Vitis flexuosa|Vitis vinifera|Hydrangea paniculata|Actinidia arguta|Saurauia|Ampelopsis humulifolia|Cayratia japonica|Vitis spp.|Saurauia spp.	3	Actinidiaceae|Vitaceae|Hydrangeaceae	3	Ericales|Vitales|Cornales
Sphingidae	Sphinginae	Sphingini	Amphimoea	Amphimoea walkeri	1	Anaxagorea	2	Anaxagorea crassipetala|Anaxagorea phaeocarpa	1	Annonaceae	1	Magnoliales
Sphingidae	Macroglossinae	Dilophonotini	Amphion	Amphion floridensis	8	Oenothera|Chamerion|Epilobium|Fuchsia|Citrus|Parthenocissus|Vitis|Ampelopsis	13	Oenothera biennis|Chamerion angustifolium|Epilobium coloratum|Fuchsia|Citrus|Parthenocissus quinquefolia|Parthenocissus tricuspidata|Vitis riparia|Vitis vinifera|Vitis sp.|Ampelopsis sp.|Parthenocissus vitacea|Epilobium angustifolia	3	Vitaceae|Onagraceae|Rutaceae	3	Vitales|Myrtales|Sapindales	4	Circaea|Ampelopsis|Parthenocissus|Vitis	5	Circaea lutetiana|Ampelopsis brevipedunculata|Parthenocissus quinquefolia|Vitis labrusca|Vitis novae-angliae	2	Vitaceae|Onagraceae	2	Vitales|Myrtales
Sphingidae	Smerinthinae	Ambulycini	Amplypterus	Amplypterus panopus	7	Calophyllum|Mangifera|Quercus|Garcinia|Dracontomelon|Toxicodendron|Rhus	12	Calophyllum inophyllum|Mangifera indica|Mangifera|Quercus|Garcinia oblongifolia|Dracontomelon dao|Mangifera caesia|Toxicodendron vernicifluum|Garcinia sp.|Rhus vernicifera|Dracontomelon mangiferum|Mangifera sp.	4	Calophyllaceae|Anacardiaceae|Clusiaceae|Fagaceae	3	Malpighiales|Sapindales|Fagales	1	Mangifera	1	Mangifera indica	1	Anacardiaceae	1	Sapindales
Sphingidae	Smerinthinae	Polyptychus Genus-Group	Andriasa	Andriasa contraria	8	Markhamia|Newbouldia|Spathodea|Jasminum|Vitex|Dichapetalum|Celtis|Chaetachme	13	Markhamia|Markhamia lutea|Newbouldia laevis|Spathodea campanulata|Jasminum dichotomum|Vitex doniana|Dichapetalum madagascariense|Celtis zenkeri|Chaetachme aristata|Dichapetalum guineense|Chaetacme aristata|Newbouldia imperialis|Markhamia napoleoni	6	Cannabaceae|Ulmaceae|Dichapetalaceae|Oleaceae|Bignoniaceae|Lamiaceae	3	Rosales|Malpighiales|Lamiales	1	Markhamia	1	Markhamia zanzibarica	1	Bignoniaceae	1	Lamiales
Sphingidae	Macroglossinae	Macroglossini	Angonyx	Angonyx krishna	1	Strychnos	1	Strychnos nux-vomica	1	Loganiaceae	1	Gentianales
Sphingidae	Macroglossinae	Macroglossini	Angonyx	Angonyx testacea	1	Strychnos	1	Strychnos nux-vomica	1	Loganiaceae	1	Gentianales
Sphingidae	Macroglossinae	Macroglossini	Antinephele	Antinephele achlora	1	Chassalia	1	Chassalia kolly	1	Rubiaceae	1	Gentianales
Sphingidae	Macroglossinae	Macroglossini	Antinephele	Antinephele anomala	2	Chassalia|Psychotria	2	Chassalia kolly|Psychotria calva	1	Rubiaceae	1	Gentianales
Sphingidae	Sphinginae	Sphingini	Apocalypsis	Apocalypsis velox	2	Fraxinus|Callicarpa	2	Fraxinus chinensis|Callicarpa arborea	2	Lamiaceae|Oleaceae	1	Lamiales
Sphingidae	Macroglossinae	Macroglossini	Atemnora	Atemnora westermannii	4	Strychnos|Morinda|Psychotria|Terminalia	6	Strychnos henningsii|Morinda lucida|Morinda morindoides|Psychotria|Terminalia ivorensis|Strychnos sp.	3	Rubiaceae|Loganiaceae|Combretaceae	2	Gentianales|Myrtales
Sphingidae	Macroglossinae	Macroglossini	Basiothia	Basiothia aureata	1	Impatiens	1	Impatiens sp.	1	Balsaminaceae	1	Ericales
Sphingidae	Macroglossinae	Macroglossini	Basiothia	Basiothia charis	4	Vernonia|Spermacoce|Gossypium|Borreria	5	Vernonia|Spermacoce octodon|Gossypium|Vernonia sp.|Borreria octodon	3	Rubiaceae|Malvaceae|Asteraceae	3	Gentianales|Malvales|Asterales
Sphingidae	Macroglossinae	Macroglossini	Basiothia	Basiothia medea	11	Hedyotis|Pentanisia|Pentas|Richardia|Spermacoce|Lindernia|Verbena|Ipomoea|Linderniella|Borreria|Oldenlandia	25	Hedyotis|Hedyotis corymbosa|Hedyotis lancifolia|Pentanisia schweinfurthii|Pentas|Richardia scabra|Spermacoce|Spermacoce latifolia|Spermacoce octodon|Spermacoce scabra|Spermacoce verticillata|Lindernia gracilis|Verbena|Ipomoea batatas|Spermacoce natalensis|Pentas sp.|Spermacoce sp.|Richardia sp.|Linderniella gracilis|Borreria latifolia|Borreria octodon|Borreria scabra|Borreria verticillata|Oldenla…	4	Rubiaceae|Convolvulaceae|Linderniaceae|Verbenaceae	3	Gentianales|Solanales|Lamiales	7	Galium|Hedyotis|Pentas|Chamerion|Epilobium|Fuchsia|Vitis	7	Galium|Hedyotis|Pentas coccinea|Chamerion angustifolium|Epilobium hirsutum|Fuchsia|Vitis vinifera	3	Onagraceae|Rubiaceae|Vitaceae	3	Myrtales|Gentianales|Vitales
Sphingidae	Macroglossinae	Macroglossini	Basiothia	Basiothia schenki	4	Anthospermum|Pentanisia|Zantedeschia|Vernonia	4	Anthospermum|Pentanisia angustifolia|Zantedeschia aethiopica|Vernonia sp.	3	Rubiaceae|Asteraceae|Araceae	3	Gentianales|Asterales|Alismatales
Sphingidae	Smerinthinae	Ambulycini	Batocnema	Batocnema africanus	2	Mangifera|Sclerocarya	3	Mangifera indica|Sclerocarya caffra|Sclerocarya birrea	1	Anacardiaceae	1	Sapindales
Sphingidae	Smerinthinae	Ambulycini	Batocnema	Batocnema coquerelii	1	Anacardium	1	Anacardium occidentale	1	Anacardiaceae	1	Sapindales
Sphingidae	Smerinthinae	Incertae Sedis	Callambulyx	Callambulyx junonia	2	Salix|Ulmus	2	Salix babylonica|Ulmus davidiana	2	Salicaceae|Ulmaceae	2	Malpighiales|Rosales
Sphingidae	Smerinthinae	Incertae Sedis	Callambulyx	Callambulyx kitchingi	5	Salix|Malus|Prunus|Hemiptelea|Ulmus	5	Salix|Malus pumila|Prunus mume|Hemiptelea davidii|Ulmus davidiana	3	Ulmaceae|Rosaceae|Salicaceae	2	Rosales|Malpighiales
Sphingidae	Smerinthinae	Incertae Sedis	Callambulyx	Callambulyx rubricosa									1	Salix	1	Salix caprea	1	Salicaceae	1	Malpighiales
Sphingidae	Smerinthinae	Incertae Sedis	Callambulyx	Callambulyx tatarinovii	10	Ulmus|Betula|Prunus|Aphananthe|Zelkova|Populus|Salix|Hemiptelea|Euonymus|Tilia	15	Ulmus pumila|Betula|Prunus persica|Aphananthe aspera|Zelkova serrata|Populus|Salix babylonica|Hemiptelea davidii|Ulmus|Ulmus davidiana|Ulmus minor|Ulmus parvifolia|Euonymus alatus|Euonymus sieboldianus|Tilia amurensis	7	Cannabaceae|Betulaceae|Celastraceae|Ulmaceae|Salicaceae|Rosaceae|Malvaceae	5	Rosales|Fagales|Celastrales|Malpighiales|Malvales	1	Ulmus	1	Ulmus pumila	1	Ulmaceae	1	Rosales
Sphingidae	Macroglossinae	Dilophonotini	Callionima		1	Stemmadenia	1	Stemmadenia sp.	1	Apocynaceae	1	Gentianales
Sphingidae	Macroglossinae	Dilophonotini	Callionima	Callionima denticulata	2	Stemmadenia|Tabernaemontana	7	Stemmadenia|Stemmadenia alfari|Stemmadenia donnellsmithii|Stemmadenia robinsonii|Tabernaemontana alba|Stemmadenia obovata|Tabernaemontana longipes	1	Apocynaceae	1	Gentianales
Sphingidae	Macroglossinae	Dilophonotini	Callionima	Callionima falcifera	3	Rauvolfia|Stemmadenia|Tabernaemontana	9	Rauvolfia ligustrina|Rauvolfia tetraphylla|Stemmadenia|Stemmadenia obovata|Tabernaemontana alba|Stemmadenia sp.|Rauvolfia sp.|Tabernaemontana sp.|Stemmadenia donnellsmithii	1	Apocynaceae	1	Gentianales
Sphingidae	Macroglossinae	Dilophonotini	Callionima	Callionima grisescens	2	Aspidosperma|Cestrum	2	Aspidosperma quebracho-blanco|Cestrum sp.	2	Apocynaceae|Solanaceae	2	Gentianales|Solanales
Sphingidae	Macroglossinae	Dilophonotini	Callionima	Callionima inuus	2	Ambelania|Stemmadenia	6	Ambelania acida|Ambelania tenuiflora|Stemmadenia donnellsmithii|Stemmadenia obovata|Stemmadenia sp.|Ambelania sp.	1	Apocynaceae	1	Gentianales
Sphingidae	Macroglossinae	Dilophonotini	Callionima	Callionima nomius	1	Aspidosperma	1	Aspidosperma macrocarpon	1	Apocynaceae	1	Gentianales
Sphingidae	Macroglossinae	Dilophonotini	Callionima	Callionima parce	1	Tabernaemontana	1	Tabernaemontana australis	1	Apocynaceae	1	Gentianales
Sphingidae	Macroglossinae	Dilophonotini	Cautethia	Cautethia exuma	1	Erithalis	1	Erithalis fruticosa	1	Rubiaceae	1	Gentianales
Sphingidae	Macroglossinae	Dilophonotini	Cautethia	Cautethia grotei	3	Chiococca|Exostema|Erithalis	3	Chiococca alba|Exostema sp.|Erithalis fruticosa	1	Rubiaceae	1	Gentianales
Sphingidae	Macroglossinae	Dilophonotini	Cautethia	Cautethia spuria	4	Chiococca|Coutarea|Exostema|Allenanthus	7	Chiococca|Chiococca alba|Chiococca pachyphylla|Coutarea hexandra|Exostema mexicanum|Allenanthus erythrocarpus|Chiococca belizensis	1	Rubiaceae	1	Gentianales
Sphingidae	Macroglossinae	Dilophonotini	Cautethia	Cautethia yucatana	3	Chiococca|Exostema|Coutarea	4	Chiococca alba|Exostema caribaeum|Exostema mexicanum|Coutarea hexandra	1	Rubiaceae	1	Gentianales
Sphingidae	Macroglossinae	Macroglossini	Cechenena	Cechenena aegrota	1	Psychotria	2	Psychotria rubra|Psychotria viridiflora	1	Rubiaceae	1	Gentianales
Sphingidae	Macroglossinae	Macroglossini	Cechenena	Cechenena chimaera	1	Psychotria	2	Psychotria sp.|Psychotria viridiflora	1	Rubiaceae	1	Gentianales
Sphingidae	Macroglossinae	Macroglossini	Cechenena	Cechenena helops	1	Tetrastigma	1	Tetrastigma sp.	1	Vitaceae	1	Vitales
Sphingidae	Macroglossinae	Macroglossini	Cechenena	Cechenena mirabilis	1	Vitis	2	Vitis sp.|Vitis himalayana	1	Vitaceae	1	Vitales
Sphingidae	Macroglossinae	Macroglossini	Cechetra	Cechetra pollux	1	Saurauia	1	Saurauia sp.	1	Actinidiaceae	1	Ericales
Sphingidae	Macroglossinae	Macroglossini	Cechetra	Cechetra subangustata	1	Vitis	1	Vitis sp.	1	Vitaceae	1	Vitales
Sphingidae	Macroglossinae	Macroglossini	Cechetra	Cechetra lineosa	5	Actinidia|Saurauia|Impatiens|Polygonum|Vitis	8	Actinidia fulvicoma|Saurauia tristyla|Impatiens|Impatiens balsamina|Polygonum|Polygonum chinense|Vitis|Vitis vinifera	4	Actinidiaceae|Balsaminaceae|Polygonaceae|Vitaceae	3	Ericales|Caryophyllales|Vitales
Sphingidae	Macroglossinae	Macroglossini	Cechetra	Cechetra minor	9	Actinidia|Saurauia|Fallopia|Polygonum|Amorphophallus|Leea|Ampelopsis|Cayratia|Vitis	9	Actinidia fulvicoma|Saurauia punduana|Fallopia multiflora|Polygonum|Amorphophallus variabilis|Leea|Ampelopsis heterophylla|Cayratia corniculata|Vitis	5	Actinidiaceae|Araceae|Vitaceae|Polygonaceae|Vitaceae	4	Ericales|Alismatales|Vitales|Caryophyllales
Sphingidae	Macroglossinae	Macroglossini	Cechetra	Cechetra scotti	2	Impatiens|Vitis	2	Impatiens sp.|Vitis sp.	2	Balsaminaceae|Vitaceae	2	Ericales|Vitales
Sphingidae	Macroglossinae	Macroglossini	Centroctena	Centroctena imitans	2	Cissus|Rhoicissus	3	Cissus quadrangularis|Cissus rotundifolia|Rhoicissus sp.	1	Vitaceae	1	Vitales
Sphingidae	Macroglossinae	Macroglossini	Centroctena	Centroctena rutherfordi	5	Ipomoea|Leea|Ampelocissus|Cissus|Vitis	6	Ipomoea cairica|Leea guineensis|Ampelocissus multistriata|Cissus|Cissus petiolata|Vitis arguta	3	Vitaceae|Convolvulaceae|Vitaceae	2	Vitales|Solanales
Sphingidae	Macroglossinae	Hemarini	Cephonodes		5	Gardenia|Xylia|Hymenodictyon|Mitragyna|Tectona	6	Gardenia resinifera|Xylia xylocarpa|Hymenodictyon obovatum|Mitragyna diversifolia|Mitragyna parvifolia|Tectona grandis	3	Rubiaceae|Lamiaceae|Fabaceae	3	Gentianales|Lamiales|Fabales
Sphingidae	Macroglossinae	Hemarini	Cephonodes	Cephonodes apus	2	Antirhea|Coffea	2	Antirhea borbonica|Coffea mauritiana	1	Rubiaceae	1	Gentianales
Sphingidae	Macroglossinae	Hemarini	Cephonodes	Cephonodes armatus	3	Gardenia|Guettarda|Morinda	4	Gardenia|Gardenia jasminoides|Guettarda speciosa|Morinda citrifolia	1	Rubiaceae	1	Gentianales
Sphingidae	Macroglossinae	Hemarini	Cephonodes	Cephonodes hylas	45	Oxyanthus|Pavetta|Wendlandia|Gardenia|Tabernaemontana|Canthium|Cornus|Camellia|Lonicera|Adina|Aidia|Catunaregam|Cinchona|Coffea|Haldina|Hymenodictyon|Ixora|Mitragyna|Mussaenda|Psychotria|Randia|Tricalysia|Ziziphus|Theobroma|Litchi|Chassalia|Argocoffeopsis|Breonadia|Burchellia|Crossopteryx|Genipa|Guettarda|Morelia|Nauclea|Polysphaeria|Porterandia|Pyrostria|Sarcocephalus|Vangueria|Spathodea|Vitex|C…	93	Oxyanthus formosus|Pavetta tomentosa|Wendlandia exserta|Gardenia jasminoides|Tabernaemontana orientalis|Canthium odoratum|Pavetta australiensis|Cornus paucinervis|Camellia sinensis|Lonicera sempervirens|Tabernaemontana divaricata|Tabernaemontana rostrata|Adina pilulifera|Adina rubella|Aidia canthioides|Catunaregam spinosa|Cinchona ledgeriana|Coffea|Coffea arabica|Coffea bengalensis|Coffea canepho…	11	Rubiaceae|Theaceae|Meliaceae|Cornaceae|Apocynaceae|Sapindaceae|Caprifoliaceae|Bignoniaceae|Malvaceae|Lamiaceae|Rhamnaceae	8	Gentianales|Ericales|Sapindales|Cornales|Dipsacales|Lamiales|Malvales|Rosales	3	Cephalanthus|Gardenia|Tarenna	3	Cephalanthus occidentalis|Gardenia|Tarenna attenuata	1	Rubiaceae	1	Gentianales
Sphingidae	Macroglossinae	Hemarini	Cephonodes	Cephonodes janus	1	Gardenia	1	Gardenia sp.	1	Rubiaceae	1	Gentianales
Sphingidae	Macroglossinae	Hemarini	Cephonodes	Cephonodes kingii	6	Canthium|Gardenia|Kailarsenia|Tarenna|Medicago|Citrus	15	Canthium attenuatum|Canthium coprosmoides|Canthium odoratum|Canthium oleifolium|Gardenia|Gardenia jasminoides|Gardenia ovularis|Kailarsenia ochreata|Tarenna|Medicago sativa|Citrus medica|Gardenia augusta|Citrus lemon|Gardenia ochreata|Tarenna sp.	3	Rubiaceae|Rutaceae|Fabaceae	3	Gentianales|Sapindales|Fabales
Sphingidae	Macroglossinae	Hemarini	Cephonodes	Cephonodes lifuensis	1	Gardenia	1	Gardenia sp.	1	Rubiaceae	1	Gentianales
Sphingidae	Macroglossinae	Hemarini	Cephonodes	Cephonodes picus	15	Aidia|Catunaregam|Coffea|Gardenia|Guettarda|Haldina|Morinda|Pavetta|Tarenna|Uncaria|Wendlandia|Jasminum|Litchi|Adina|Randia	21	Aidia racemosa|Catunaregam spinosa|Coffea|Coffea canephora|Coffea liberica|Gardenia|Gardenia jasminoides|Guettarda speciosa|Haldina cordifolia|Morinda tinctoria|Pavetta indica|Tarenna incerta|Uncaria gambir|Wendlandia|Jasminum sambac|Litchi chinensis|Adina cordifolia|Randia dumetorum|Gardenia sp.|Coffea sp.|Tarenne incerta	3	Rubiaceae|Oleaceae|Sapindaceae	3	Gentianales|Lamiales|Sapindales
Sphingidae	Macroglossinae	Hemarini	Cephonodes	Cephonodes tamsi	1	Keetia	1	Keetia acuminata	1	Rubiaceae	1	Gentianales
Sphingidae	Macroglossinae	Hemarini	Cephonodes	Cephonodes xanthus	4	Lonicera|Adina|Gardenia|Tarenna	4	Lonicera sempervirens|Adina pilulifera|Gardenia jasminoides|Tarenna gracilipes	2	Rubiaceae|Caprifoliaceae	2	Gentianales|Dipsacales	3	Ixora|Mussaenda|Wendlandia	3	Ixora sp.|Mussaenda parviflora|Wendlandia formosana	1	Rubiaceae	1	Gentianales
Sphingidae	Sphinginae	Sphingini	Ceratomia	Ceratomia amyntor	6	Betula|Fagus|Quercus|Prunus|Ulmus|Tilia	14	Betula|Betula nigra|Betula pubescens|Fagus|Quercus macrocarpa|Prunus|Ulmus|Ulmus americana|Ulmus pumila|Tilia|Tilia americana|Ulmus sp.|Tilia sp.|Betula sp.	5	Betulaceae|Fagaceae|Rosaceae|Malvaceae|Ulmaceae	3	Fagales|Rosales|Malvales	3	Fraxinus|Robinia|Ulmus	4	Fraxinus sp.|Robinia pseudoacacia|Ulmus sp.|Ulmus americana	3	Oleaceae|Fabaceae|Ulmaceae	3	Lamiales|Fabales|Rosales
Sphingidae	Sphinginae	Sphingini	Ceratomia	Ceratomia catalpae	2	Catalpa|Manaosella	7	Catalpa|Catalpa bignonioides|Catalpa bungei|Catalpa ovata|Catalpa speciosa|Manaosella cordifolia|Catalpa sp.	1	Bignoniaceae	1	Lamiales
Sphingidae	Sphinginae	Sphingini	Ceratomia	Ceratomia hageni	1	Maclura	1	Maclura pomifera	1	Moraceae	1	Rosales
Sphingidae	Sphinginae	Sphingini	Ceratomia	Ceratomia sonorensis	1	Fraxinus	3	Fraxinus sp.|Fraxinus velutina|Fraxinus arizonensis	1	Oleaceae	1	Lamiales
Sphingidae	Sphinginae	Sphingini	Ceratomia	Ceratomia undulosa	7	Campsis|Chionanthus|Fraxinus|Ligustrum|Syringa|Quercus|Crataegus	17	Campsis radicans|Chionanthus virginicus|Fraxinus|Fraxinus americana|Fraxinus nigra|Fraxinus pennsylvanica|Fraxinus texensis|Ligustrum|Syringa|Quercus alba|Quercus rubra|Crataegus|Fraxinus excelsior|Fraxinus platycarpa|Ligustrum vulgare|Fraxinus sp.|Ligustrum sp.	4	Bignoniaceae|Oleaceae|Rosaceae|Fagaceae	3	Lamiales|Rosales|Fagales	4	Fraxinus|Ligustrum|Syringa|Robinia	4	Fraxinus sp.|Ligustrum sp.|Syringa vulgaris|Robinia pseudoacacia	2	Oleaceae|Fabaceae	2	Lamiales|Fabales
Sphingidae	Sphinginae	Sphingini	Cerberonoton	Cerberonoton rubescens	6	Fissistigma|Kigelia|Spathodea|Annona|Desmos|Melodorum	6	Melodorum oldhami|Fissistigma oldhami|Kigelia africana|Spathodea campanulata|Annona muricata|Desmos lawii	2	Annonaceae|Bignoniaceae	2	Magnoliales|Lamiales
Sphingidae	Smerinthinae	Polyptychus Genus-Group	Chloroclanis	Chloroclanis virescens	3	Celtis|Chaetachme|Trema	5	Celtis zenkeri|Chaetachme aristata|Trema orientalis|Chaetacme aristata|Trema guineensis	2	Cannabaceae|Ulmaceae	1	Rosales
Sphingidae	Macroglossinae	Macroglossini	Cizara	Cizara ardeniae	6	Coprosma|Morinda|Myrmecodia|Oreocallis|Cissus|Grevillea	8	Coprosma lucida|Coprosma quadrifida|Coprosma repens|Morinda jasminoides|Myrmecodia beccarii|Oreocallis|Cissus sp.|Grevillea sericea	3	Vitaceae|Rubiaceae|Proteaceae	3	Vitales|Gentianales|Proteales
Sphingidae	Macroglossinae	Macroglossini	Cizara	Cizara sculpta	4	Catunaregam|Gardenia|Clerodendrum|Randia	6	Catunaregam spinosa|Gardenia campanulata|Gardenia jasminoides|Gardenia sessiliflora|Clerodendrum infortunatum|Randia dumetorum	2	Rubiaceae|Lamiaceae	2	Gentianales|Lamiales
Sphingidae	Smerinthinae	Leucophlebiini	Clanidopsis	Clanidopsis exusta	3	Indigofera|Populus|Tilia	5	Indigofera|Populus|Tilia tuan|Indigofera sp.|Populis sp.	3	Fabaceae|Salicaceae|Malvaceae	3	Fabales|Malpighiales|Malvales
Sphingidae	Smerinthinae	Leucophlebiini	Clanis		1	Millettia	1	Millettia extensa	1	Fabaceae	1	Fabales
Sphingidae	Smerinthinae	Leucophlebiini	Clanis	Clanis bilineata	11	Glycine|Lespedeza|Pueraria|Robinia|Wisteria|Cassia|Acacia|Millettia|Mucuna|Pongamia|Pterocarpus	22	Glycine max|Lespedeza bicolor|Lespedeza cyrtobotrya|Pueraria lobata|Robinia pseudoacacia|Wisteria sinensis|Cassia|Acacia mearnsii|Lespedeza|Millettia atropurpurea|Millettia championii|Millettia dielsiana|Millettia pachycarpa|Millettia reticulata|Mucuna birdwoodiana|Pongamia pinnata|Pterocarpus marsupium|Wisteria brachybotrys|Wisteria floribunda|Pongamia glabra|Mucuna sp.|Pueraria sp.	1	Fabaceae	1	Fabales	2	Glycine|Robinia	2	Glycine max|Robinia pseudoacacia	1	Fabaceae	1	Fabales
Sphingidae	Smerinthinae	Leucophlebiini	Clanis	Clanis deucalion	1	Robinia	2	Robinia pseudoacacia|Robinia pseudo-accacia	1	Fabaceae	1	Fabales
Sphingidae	Smerinthinae	Leucophlebiini	Clanis	Clanis phalaris	9	Cassia|Xylia|Dalbergia|Millettia|Mucuna|Pongamia|Pterocarpus|Pueraria|Butea	13	Cassia fistula|Xylia xylocarpa|Dalbergia lanceolaria|Dalbergia latifolia|Dalbergia monetaria|Millettia atropurpurea|Mucuna pruriens|Pongamia pinnata|Pterocarpus marsupium|Pueraria tuberosa|Butea monosperma|Pongamia glabra|Cassia stula	1	Fabaceae	1	Fabales
Sphingidae	Smerinthinae	Leucophlebiini	Clanis	Clanis titan	5	Xylia|Dalbergia|Derris|Millettia|Pterocarpus	7	Xylia xylocarpa|Dalbergia cochinchinensis|Dalbergia latifolia|Dalbergia oliveri|Derris platyptera|Millettia atropurpurea|Pterocarpus marsupium	1	Fabaceae	1	Fabales
Sphingidae	Smerinthinae	Leucophlebiini	Clanis	Clanis undulosa	1	Lespedeza	4	Lespedeza formosa|Lespedeza viatorum|Lespedeza thomsoni|Lespedeza spp.	1	Fabaceae	1	Fabales	2	Caragana|Robinia	2	Caragana arborescens|Robinia pseudoacacia	1	Fabaceae	1	Fabales
Sphingidae	Macroglossinae	Macroglossini	Clarina	Clarina kotschyi	3	Ampelopsis|Parthenocissus|Vitis	3	Ampelopsis sp.|Parthenocissus sp.|Vitis vinifera	1	Vitaceae	1	Vitales
Sphingidae	Macroglossinae	Macroglossini	Clarina	Clarina syriaca	2	Parthenocissus|Vitis	3	Parthenocissus sp.|Vitis sp.|Vitis vinifera	1	Vitaceae	1	Vitales
Sphingidae	Sphinginae	Sphingini	Cocytius	Cocytius antaeus	7	Annona|Guatteria|Oxandra|Rollinia|Sapranthus|Xylopia|Unonopsis	27	Annona|Annona cherimola|Annona glabra|Annona holosericea|Annona montana|Annona muricata|Annona purpurea|Annona reticulata|Annona squamosa|Guatteria diospyroides|Oxandra venezuelana|Rollinia membranacea|Rollinia muscosa|Sapranthus palanga|Xylopia frutescens|Rollinia|Rollinia emarginata|Rollinia laurifolia|Annona cherimolia|Rollinia orthopetala|Annona papilionella|Annona pruinosa|Annona rensoniana|…	1	Annonaceae	1	Magnoliales
Sphingidae	Sphinginae	Sphingini	Cocytius	Cocytius beelzebuth	1	Guatteria	1	Guatteria diospyroides	1	Annonaceae	1	Magnoliales
Sphingidae	Sphinginae	Sphingini	Cocytius	Cocytius duponchel	7	Annona|Desmopsis|Guatteria|Oxandra|Rollinia|Xylopia|Unonopsis	22	Annona glabra|Annona holosericea|Annona muricata|Annona purpurea|Annona reticulata|Annona squamosa|Desmopsis|Guatteria aeruginosa|Guatteria diospyroides|Guatteria tonduzii|Oxandra virgata|Rollinia membranacea|Rollinia muscosa|Xylopia frutescens|Rollinia orthopetala|Annona papilionella|Annona pruinosa|Annona rensoniana|Guatteria amplifolia|Guatteria verrucosa|Rollinia rensoniana|Unonopsis stevensii	1	Annonaceae	1	Magnoliales
Sphingidae	Sphinginae	Sphingini	Cocytius	Cocytius lucifer	6	Annona|Rollinia|Sapranthus|Xylopia|Desmopsis|Guatteria	12	Annona purpurea|Annona reticulata|Rollinia membranacea|Sapranthus palanga|Xylopia frutescens|Desmopsis|Desmopsis schippii|Annona rensoniana|Guatteria amplifolia|Guatteria diospyroides|Guatteria tonduzii|Guatteria aeruginosa	1	Annonaceae	1	Magnoliales
Sphingidae	Sphinginae	Sphingini	Coelonia		1	Bougainvillea	1	Bougainvillea sp.	1	Nyctaginaceae	1	Caryophyllales
Sphingidae	Sphinginae	Sphingini	Coelonia	Coelonia fulvinotata	41	Dahlia|Acanthus|Bignonia|Fernandoa|Kigelia|Millingtonia|Podranea|Spathodea|Tecoma|Buddleja|Nuxia|Aeschynanthus|Pycnostachys|Salvia|Solenostemon|Fraxinus|Jasminum|Veronica|Oftia|Halleria|Clerodendrum|Duranta|Gmelina|Lantana|Stachytarpheta|Tectona|Convolvulus|Ipomoea|Nicotiana|Solanum|Cordia|Ehretia|Cissus|Markhamia|Newbouldia|Ricinus|Lycopersicum|Lachnopyhyllum|Tecomaria|Coleus|Sabicea	71	Dahlia variabilis|Acanthus mollis|Acanthus pubescens|Bignonia|Fernandoa|Fernandoa magnifica|Kigelia africana|Millingtonia hortensis|Podranea brycei|Spathodea campanulata|Tecoma capensis|Buddleja|Nuxia|Nuxia sambesina|Nuxia verticillata|Aeschynanthus marmoratus|Pycnostachys urticifolia|Salvia|Solenostemon|Fraxinus floribunda|Jasminum|Veronica speciosa|Oftia africana|Halleria lucida|Clerodendrum bu…	17	Acanthaceae|Gesneriaceae|Bignoniaceae|Scrophulariaceae|Vitaceae|Lamiaceae|Convolvulaceae|Boraginaceae|Asteraceae|Verbenaceae|Boraginaceae |Oleaceae|Stilbaceae|Solanaceae|Euphorbiaceae|Rubiaceae|Plantaginaceae	7	Lamiales|Vitales|Solanales|Boraginales|Asterales|Malpighiales|Gentianales	1	Spathodea	1	Spathodea campanulata	1	Bignoniaceae	1	Lamiales
Sphingidae	Sphinginae	Sphingini	Coelonia	Coelonia solani	3	Clerodendrum|Duranta|Solanum	4	Clerodendrum heterophyllum|Duranta|Solanum|Solanum lycopersicum	3	Lamiaceae|Verbenaceae|Solanaceae	2	Lamiales|Solanales
Sphingidae	Sphinginae	Australian Sphingulini	Coenotes	Coenotes eremophilae	20	Carissa|Mussaenda|Barleria|Prostanthera|Bontia|Eremophila|Myoporum|Josephinia|Sesamum|Clerodendrum|Newcastelia|Stachytarpheta|Vitex|Duboisia|Gyrocarpus|Acacia|Archidendropsis|Hibiscus|Santalum|Albizia	32	Carissa lanceolata|Mussaenda|Barleria cristata|Prostanthera|Prostanthera striatifolia|Bontia bowmanii|Bontia sturtii|Eremophila freelingii|Eremophila gilesii|Eremophila latrobei|Eremophila longifolia|Eremophila mitchellii|Myoporum tenuifolium|Josephinia eugeniae|Sesamum indicum|Clerodendrum floribundum|Newcastelia spodiotricha|Stachytarpheta urticifolia|Vitex glabrata|Duboisia leichhardtii|Dubois…	12	Fabaceae|Acanthaceae|Scrophulariaceae|Apocynaceae|Lamiaceae|Solanaceae|Hernandiaceae|Malvaceae|Pedaliaceae|Rubiaceae|Santalaceae|Verbenaceae	7	Fabales|Lamiales|Gentianales|Solanales|Laurales|Malvales|Santalales
Sphingidae	Smerinthinae	Incertae Sedis	Coequosa	Coequosa australasiae	2	Eucalyptus|Banksia	6	Eucalyptus elata|Eucalyptus saligna|Eucalyptus|Eucalyptus citriodora|Eucalyptus citriodorata|Banksia sp.	2	Proteaceae|Myrtaceae	2	Proteales|Myrtales	1	Eucalyptus	1	Eucalyptus tereticornis	1	Myrtaceae	1	Myrtales
Sphingidae	Smerinthinae	Incertae Sedis	Coequosa	Coequosa triangularis	7	Banksia|Grevillea|Macadamia|Persoonia|Stenocarpus|Hakea|Eucalyptus	19	Banksia|Banksia ericifolia|Banksia integrifolia|Banksia marginata|Banksia serrata|Banksia spinulosa|Grevillea|Grevillea asplenifolia|Grevillea robusta|Macadamia integrifolia|Persoonia|Persoonia laevis|Persoonia sp.|Persoonia lanceolata|Stenocarpus sinuatus|Grevillea asplenifolia/caleyi|Hakea spp.|Persoonia levis|Eucalyptus citriodorata	2	Proteaceae|Myrtaceae	2	Proteales|Myrtales
Sphingidae	Smerinthinae	Ambulycini	Compsulyx	Compsulyx cochereaui	1	Tristaniopsis	2	Tristaniopsis reticulata|Tristaniopsis sp.	1	Myrtaceae	1	Myrtales
Sphingidae	Smerinthinae	Incertae Sedis	Craspedortha	Craspedortha porphyria	2	Vitex|Morus	2	Vitex canescens|Morus alba	2	Moraceae|Lamiaceae	2	Rosales|Lamiales
Sphingidae	Smerinthinae	Cypa Genus-Group	Cypa	Cypa decolor	2	Dipterocarpus|Dryobalanops	2	Dipterocarpus tuberculatus|Dryobalanops lanceolata	1	Dipterocarpaceae	1	Malvales
Sphingidae	Smerinthinae	Cypa Genus-Group	Cypa	Cypa enodis	2	Betula|Lithocarpus	2	Betula alnoides|Lithocarpus fenestratus	2	Betulaceae|Fagaceae	1	Fagales
Sphingidae	Smerinthinae	Cypa Genus-Group	Cypa	Cypa latericia	1	Shorea	1	Shorea obtusa	1	Dipterocarpaceae	1	Malvales
Sphingidae	Smerinthinae	Cypa Genus-Group	Cypa	Cypa pallens	2	Betula|Quercus	2	Betula alnoides|Quercus fenestrata	2	Betulaceae|Fagaceae	1	Fagales
Sphingidae	Smerinthinae	Cypa Genus-Group	Cypa	Cypa uniformis	2	Castanopsis|Quercus	3	Castanopsis fissa|Castanopsis lamontii|Quercus cuspidata	1	Fagaceae	1	Fagales
Sphingidae	Smerinthinae	Cypa Genus-Group	Cypoides	Cypoides chinensis	4	Prunus|Liquidambar|Quercus|Broussonetia	4	Prunus|Liquidambar formosana|Quercus acutissima|Broussonetia papyrifera	4	Moraceae|Altingiaceae|Rosaceae|Fagaceae	3	Rosales|Saxifragales|Fagales
Sphingidae	Macroglossinae	Macroglossini	Dahira	Dahira hoenei	1	Vitis	1	Vitis sp.	1	Vitaceae	1	Vitales
Sphingidae	Macroglossinae	Macroglossini	Dahira	Dahira rubiginosa	1	Ilex	1	Ilex rotunda	1	Aquifoliaceae	1	Aquifoliales
Sphingidae	Macroglossinae	Macroglossini	Daphnis	Daphnis hypothous	18	Dyera|Mitragyna|Neolamarckia|Alstonia|Nerium|Tabernaemontana|Cinchona|Gardenia|Guettarda|Ixora|Pavetta|Rubia|Spermacoce|Uncaria|Wendlandia|Acacia|Anthocephalus|Nauclea	28	Dyera costulata|Mitragyna|Neolamarckia cadamba|Alstonia angustiloba|Alstonia scholaris|Nerium oleander|Tabernaemontana malaccensis|Cinchona|Cinchona pubescens|Gardenia|Guettarda speciosa|Ixora|Pavetta|Rubia cordifolia|Spermacoce|Uncaria|Uncaria gambir|Uncaria rhynchophylla|Wendlandia formosana|Wendlandia paniculata|Acacia catechu|Uncaria sp.|Cinchona sp.|Alstonia actinophylla|Alstonia constricta|…	3	Fabaceae|Apocynaceae|Rubiaceae	2	Fabales|Gentianales
Sphingidae	Macroglossinae	Macroglossini	Daphnis	Daphnis minima	1	Alangium	2	Alangium salviifolium|Alangium lamarckii	1	Cornaceae	1	Cornales
Sphingidae	Macroglossinae	Macroglossini	Daphnis	Daphnis moorei	3	Alstonia|Nauclea|Neolamarckia	6	Alstonia actinophylla|Alstonia constricta|Alstonia muelleriana|Alstonia scholaris|Nauclea orientalis|Neolamarckia cadamba	2	Apocynaceae|Rubiaceae	1	Gentianales
Sphingidae	Macroglossinae	Macroglossini	Daphnis	Daphnis nerii	56	Acokanthera|Adenium|Allamanda|Alstonia|Amsonia|Carissa|Catharanthus|Cerbera|Funtumia|Holarrhena|Hunteria|Nerium|Ochrosia|Pachypodium|Picralima|Plumeria|Rauvolfia|Rhazya|Strophanthus|Tabernaemontana|Thevetia|Vinca|Voacanga|Asclepias|Strychnos|Burttdavya|Cinchona|Gardenia|Hallea|Mussaenda|Nauclea|Sarcocephalus|Jasminum|Ligustrum|Syringa|Tectona|Ipomoea|Solanum|Nonea|Senna|Xylia|Lonchocarpus|Juglans…	97	Acokanthera|Adenium|Adenium coetaneum|Adenium multiflorum|Adenium obesum|Allamanda|Alstonia boonei|Alstonia scholaris|Amsonia|Carissa macrocarpa|Catharanthus roseus|Cerbera manghas|Funtumia elastica|Holarrhena densiflora|Holarrhena floribunda|Holarrhena pubescens|Hunteria eburnea|Nerium|Nerium oleander|Ochrosia borbonica|Pachypodium|Picralima nitida|Plumeria|Plumeria rubra|Rauvolfia|Rauvolfia caf…	18	Apocynaceae|Rubiaceae|Sapindaceae|Cornaceae|Moraceae|Onagraceae|Malvaceae|Convolvulaceae|Oleaceae|Juglandaceae|Fabaceae|Anacardiaceae|Boraginaceae|Violaceae|Solanaceae|Loganiaceae|Lamiaceae|Vitaceae	13	Gentianales|Sapindales|Cornales|Rosales|Myrtales|Malvales|Solanales|Lamiales|Fagales|Fabales|Boraginales|Malpighiales|Vitales	12	Scabiosa|Adenium|Catharanthus|Nerium|Rauvolfia|Tabernaemontana|Vinca|Gardenia|Fraxinus|Ligustrum|Ipomoea|Caladium	14	Scabiosa atropurpurea|Adenium obesum|Catharanthus roseus|Nerium oleander|Rauvolfia verticillata|Tabernaemontana divaricata|Vinca|Vinca major|Vinca minor|Gardenia jasminoides|Fraxinus floribunda|Ligustrum ovalifolium|Ipomoea batatas|Caladium	6	Apocynaceae|Araceae|Oleaceae|Rubiaceae|Convolvulaceae|Caprifoliaceae	5	Gentianales|Alismatales|Lamiales|Solanales|Dipsacales
Sphingidae	Macroglossinae	Macroglossini	Daphnis	Daphnis placida	8	Alangium|Alstonia|Apocynum|Ochrosia|Plumeria|Tabernaemontana|Ipomoea|Guettarda	16	Alangium salviifolium|Alangium villosum|Alstonia actinophylla|Alstonia constricta|Alstonia muelleriana|Alstonia scholaris|Apocynum|Ochrosia elliptica|Plumeria|Tabernaemontana angustisepala|Tabernaemontana divaricata|Tabernaemontana orientalis|Ipomoea batatas|Tabernaemontana|Guettarda microphylla|Tabernaemontana sp.	4	Cornaceae|Apocynaceae|Rubiaceae|Convolvulaceae	3	Cornales|Gentianales|Solanales
Sphingidae	Macroglossinae	Macroglossini	Daphnis	Daphnis protrudens	2	Nerium|Timonius	2	Nerium sp.|Timonius timon	2	Apocynaceae|Rubiaceae	1	Gentianales
Sphingidae	Macroglossinae	Macroglossini	Daphnis	Daphnis torenia	1	Alstonia	1	Alstonia sp.	1	Apocynaceae	1	Gentianales
Sphingidae	Smerinthinae	Sichiini	Daphnusa	Daphnusa fruhstorferi	1	Durio	1	Durio zibethinus	1	Malvaceae	1	Malvales
Sphingidae	Smerinthinae	Sichiini	Daphnusa	Daphnusa ocellaris	2	Nephelium|Durio	2	Nephelium lappaceum|Durio zibethinus	2	Malvaceae|Sapindaceae	2	Malvales|Sapindales
Sphingidae	Smerinthinae	Sichiini	Daphnusa	Daphnusa sinocontinentalis	2	Durio|Brucea	2	Durio zibethinus|Brucea javanica	2	Simaroubaceae|Malvaceae	2	Sapindales|Malvales
Sphingidae	Macroglossinae	Macroglossini	Darapsa	Darapsa choerilus	7	Gaylussacia|Rhododendron|Viburnum|Nyssa|Kalmia|Vaccinium|Lonicera	17	Gaylussacia|Rhododendron viscosum|Viburnum dentatum|Viburnum lentago|Viburnum opulus|Nyssa multiflora|Nyssa sylvatica|Kalmia angustifolia|Rhododendron|Rhododendron periclymenoidees|Vaccinium|Viburnum|Viburnum nudum|Rhododendron sp.|Viburnum sp.|Vaccinium sp.|Lonicera sp.	4	Ericaceae|Caprifoliaceae|Nyssaceae|Adoxaceae	3	Ericales|Dipsacales|Cornales	1	Viburnum	2	Viburnum nudum|Viburnum opulus	1	Adoxaceae	1	Dipsacales
Sphingidae	Macroglossinae	Macroglossini	Darapsa	Darapsa myron	4	Viburnum|Polyalthia|Parthenocissus|Vitis	6	Viburnum|Polyalthia longifolia|Parthenocissus quinquefolia|Vitis riparia|Vitis vinifera|Vitis labrusca	3	Vitaceae|Annonaceae|Adoxaceae	3	Vitales|Magnoliales|Dipsacales	3	Chamerion|Parthenocissus|Vitis	4	Chamerion angustifolium|Parthenocissus quinquefolia|Vitis vinifera|Vitis sp.	2	Onagraceae|Vitaceae	2	Myrtales|Vitales
Sphingidae	Macroglossinae	Macroglossini	Darapsa	Darapsa versicolor	4	Hydrangea|Rhododendron|Cephalanthus|Decodon	5	Hydrangea arborescens|Rhododendron periclymenoidees|Rhododendron viscosum|Cephalanthus occidentalis|Decodon verticillatus	4	Rubiaceae|Lythraceae|Hydrangeaceae|Ericaceae	4	Gentianales|Myrtales|Cornales|Ericales
Sphingidae	Macroglossinae	Macroglossini	Deidamia	Deidamia inscriptum	4	Oxydendrum|Ampelopsis|Parthenocissus|Vitis	10	Oxydendrum arboreum|Ampelopsis|Parthenocissus|Parthenocissus quinquefolia|Parthenocissus tricuspidata|Vitis|Vitis vinifera|Vitis sp.|Ampelopsis sp.|Parthenocissus vitacea	2	Vitaceae|Ericaceae	2	Vitales|Ericales	1	Ampelopsis	1	Ampelopsis brevipedunculata	1	Vitaceae	1	Vitales
Sphingidae	Macroglossinae	Macroglossini	Deilephila	Deilephila askoldensis	7	Philadelphus|Galium|Fraxinus|Syringa|Corylus|Rhamnus|Vitis	10	Philadelphus incanus|Galium verum|Fraxinus bungeana|Fraxinus chinensis|Syringa oblata|Syringa reticulata|Corylus heterophylla|Rhamnus parvifolia|Vitis vinifera|Vitis amurensis	6	Betulaceae|Oleaceae|Rubiaceae|Hydrangeaceae|Rhamnaceae|Vitaceae	6	Fagales|Lamiales|Gentianales|Cornales|Rosales|Vitales
Sphingidae	Macroglossinae	Macroglossini	Deilephila	Deilephila elpenor	34	Impatiens|Lysimachia|Daucus|Menyanthes|Lonicera|Galium|Rubia|Linaria|Calystegia|Convolvulus|Saponaria|Polygonum|Rumex|Calla|Colocasia|Pinellia|Lespedeza|Trifolium|Salix|Malus|Rosa|Lythrum|Chamerion|Circaea|Clarkia|Epilobium|Fuchsia|Oenothera|Ampelopsis|Parthenocissus|Vitis|Arisaema|Astragalus|Amorphophallus	76	Impatiens|Impatiens balsamina|Impatiens glandulifera|Impatiens noli-tangere|Impatiens parviflora|Impatiens repens|Impatiens textori|Impatiens walleriana|Lysimachia|Daucus carota|Menyanthes trifoliata|Lonicera|Lonicera japonica|Lonicera periclymenum|Galium|Galium aparine|Galium boreale|Galium mollugo|Galium palustre|Galium saxatile|Galium spurium|Galium uliginosum|Galium verum|Rubia tinctorum|Lina…	17	Araceae|Vitaceae|Fabaceae|Convolvulaceae|Onagraceae|Apiaceae|Rubiaceae|Balsaminaceae|Plantaginaceae|Caprifoliaceae|Primulaceae|Lythraceae|Rosaceae|Menyanthaceae|Polygonaceae|Salicaceae|Caryophyllaceae	14	Alismatales|Vitales|Fabales|Solanales|Myrtales|Apiales|Gentianales|Ericales|Lamiales|Dipsacales|Rosales|Asterales|Caryophyllales|Malpighiales	9	Impatiens|Taraxacum|Pentas|Euphorbia|Fuchsia|Vitis|Galium|Epilobium|Parthenocissus	12	Impatiens balsamina|Taraxacum|Pentas lanceolata|Euphorbia|Fuchsia magellanica|Vitis vinifera|Impatiens textori|Galium|Galium mollugo|Epilobium|Fuchsia|Parthenocissus quinquefolia	6	Onagraceae|Euphorbiaceae|Rubiaceae|Balsaminaceae|Vitaceae|Asteraceae	6	Myrtales|Malpighiales|Gentianales|Ericales|Vitales|Asterales
Sphingidae	Macroglossinae	Macroglossini	Deilephila	Deilephila porcellus	12	Impatiens|Vaccinium|Lysimachia|Asperula|Galium|Genista|Lythrum|Chamerion|Epilobium|Oenothera|Parthenocissus|Vitis	27	Impatiens noli-tangere|Vaccinium uliginosum|Lysimachia|Asperula|Galium|Galium aparine|Galium boreale|Galium glaucum|Galium mollugo|Galium palustre|Galium saxatile|Galium sylvaticum|Galium verum|Genista tinctoria|Lythrum salicaria|Chamerion angustifolium|Chamerion dodonaei|Chamerion fleischeri|Epilobium|Epilobium montanum|Oenothera biennis|Parthenocissus|Vitis vinifera|Impatiens|Galium bullatum|Ga…	8	Rubiaceae|Onagraceae|Fabaceae|Balsaminaceae|Primulaceae|Lythraceae|Vitaceae|Ericaceae	5	Gentianales|Myrtales|Fabales|Ericales|Vitales	1	Galium	3	Galium mollugo|Galium sp.|Galium pamiroalaicum	1	Rubiaceae	1	Gentianales
Sphingidae	Macroglossinae	Macroglossini	Deilephila	Deilephila rivularis	2	Arisaema|Vitis	3	Arisaema tortuosum|Vitis sp.|Arisaema curvatum	2	Araceae|Vitaceae	2	Alismatales|Vitales
Sphingidae	Sphinginae	Sphingini	Dolba	Dolba hyloeus	6	Vaccinium|Ilex|Ligustrum|Nicotiana|Asimina|Comptonia	11	Vaccinium|Vaccinium angustifolium|Vaccinium myrtillus|Vaccinium uliginosum|Ilex decidua|Ilex glabra|Ilex verticillata|Ligustrum|Nicotiana tabacum|Asimina triloba|Comptonia peregrina	6	Annonaceae|Myricaceae|Aquifoliaceae|Oleaceae|Solanaceae|Ericaceae	6	Magnoliales|Fagales|Aquifoliales|Lamiales|Solanales|Ericales	1	Ilex	3	Ilex sp.|Ilex glabra|Ilex verticillata	1	Aquifoliaceae	1	Aquifoliales
Sphingidae	Sphinginae	Sphingulini	Dolbina		1	Fraxinus	1	Fraxinus sp.	1	Oleaceae	1	Lamiales
Sphingidae	Sphinginae	Sphingulini	Dolbina	Dolbina elegans	1	Fraxinus	1	Fraxinus sp.	1	Oleaceae	1	Lamiales	1	Ligustrum	2	Ligustrum sp.|Ligustrum ovalifolium	1	Oleaceae	1	Lamiales
Sphingidae	Sphinginae	Sphingulini	Dolbina	Dolbina exacta	5	Fraxinus|Ligustrum|Osmanthus|Syringa|Solanum	8	Fraxinus|Fraxinus chinensis|Fraxinus lanuginosa|Fraxinus mandshurica|Ligustrum obtusifolium|Osmanthus fragrans|Syringa reticulata|Solanum lycopersicum	2	Oleaceae|Solanaceae	2	Lamiales|Solanales
Sphingidae	Sphinginae	Sphingulini	Dolbina	Dolbina formosana	2	Fraxinus|Ligustrum	2	Fraxinus griffithii|Ligustrum obtusifolium	1	Oleaceae	1	Lamiales
Sphingidae	Sphinginae	Sphingulini	Dolbina	Dolbina grisea	1	Fraxinus	1	Fraxinus sogdiana	1	Oleaceae	1	Lamiales
Sphingidae	Sphinginae	Sphingulini	Dolbina	Dolbina inexacta	6	Chionanthus|Fraxinus|Ligustrum|Olea|Osmanthus|Syringa	12	Chionanthus malabarica|Fraxinus chinensis|Ligustrum lucidum|Ligustrum robustum|Olea dioica|Olea glandulifera|Osmanthus fragrans|Ligustrum japonicum|Ligustrum sinense|Osmanthus ilicifolius|Syringa|Fraxinus formosana	1	Oleaceae	1	Lamiales	2	Ligustrum|Syringa	2	Syringa sp.|Ligustrum sp.	1	Oleaceae	1	Lamiales
Sphingidae	Sphinginae	Sphingulini	Dolbina	Dolbina tancrei	4	Fraxinus|Ligustrum|Osmanthus|Syringa	8	Fraxinus|Fraxinus chinensis|Ligustrum japonicum|Ligustrum lucidum|Ligustrum obtusifolium|Osmanthus aquifolius|Osmanthus asiaticus|Syringa	1	Oleaceae	1	Lamiales
Sphingidae	Sphinginae	Sphingini	Dolbogene	Dolbogene hartwegii	1	Tecoma	1	Tecoma stans	1	Bignoniaceae	1	Lamiales	1	Tecoma	1	Tecoma stans	1	Bignoniaceae	1	Lamiales
Sphingidae	Sphinginae	Sphingini	Dovania	Dovania poecila	1	Acanthus	1	Acanthus arboreus	1	Acanthaceae	1	Lamiales
Sphingidae	Macroglossinae	Macroglossini	Elibia	Elibia dolichus	6	Saurauia|Leea|Cayratia|Tetrastigma|Vitis|Columella	5	Saurauia sp.|Leea indica|Cayratia trifolia|Vitis sp.|Tetrastigma sp.	2	Vitaceae|Actinidiaceae	2	Vitales|Ericales
Sphingidae	Macroglossinae	Macroglossini	Enpinanga	Enpinanga assamensis	1	Tetracera	1	Tetracera indica	1	Dilleniaceae	1	Dilleniales
Sphingidae	Macroglossinae	Macroglossini	Enpinanga	Enpinanga borneensis	2	Dillenia|Tetracera	2	Dillenia suffruticosa|Tetracera indica	1	Dilleniaceae	1	Dilleniales
Sphingidae	Macroglossinae	Macroglossini	Enpinanga	Enpinanga vigens	1	Tetracera	1	Tetracera indica	1	Dilleniaceae	1	Dilleniales
Sphingidae	Macroglossinae	Dilophonotini	Enyo	Enyo boisduvali	1	Cissus	1	Cissus verticillata	1	Vitaceae	1	Vitales
Sphingidae	Macroglossinae	Dilophonotini	Enyo	Enyo cavifer	2	Cissus|Vitis	11	Cissus|Cissus erosa|Cissus verticillata|Vitis|Cissus sicyoides|Cissus erosus|Cissus biformifolia|Cissus alata|Cissus pseudosicyioides|Cissus fuliginea|Cissus pseudosicyoides	1	Vitaceae	1	Vitales
Sphingidae	Macroglossinae	Dilophonotini	Enyo	Enyo gorgon	5	Dillenia|Tetracera|Cissus|Vitis|Doliocarpus	13	Dillenia indica|Tetracera volubilis|Cissus|Cissus alata|Cissus verticillata|Vitis|Vitis tiliifolia|Vitis vinifera|Cissus sicyoides|Cissus biformifolia|Cissus fuliginea|Doliocarpus multiflorus|Tetracera hydrophila	2	Vitaceae|Dilleniaceae	2	Vitales|Dilleniales
Sphingidae	Macroglossinae	Dilophonotini	Enyo	Enyo lugubris	11	Cissus|Curatella|Davilla|Doliocarpus|Tetracera|Rosa|Ampelopsis|Parthenocissus|Vitis|Randia|Spermacoce	27	Cissus verticillata|Curatella americana|Davilla nitida|Doliocarpus dentatus|Doliocarpus multiflorus|Tetracera volubilis|Rosa|Ampelopsis|Ampelopsis hederacea|Cissus|Cissus erosa|Cissus fuliginea|Parthenocissus quinquefolia|Vitis|Vitis vinifera|Randia aculeata|Cissus sicyoides|Spermacoce sp.|Ampelopsis sp.|Cissus sp.|Ampelopsis arborea|Doliocarpus sp.|Davilla sp.|Tetracera sp.|Tetracera hydrophila|…	4	Vitaceae|Dilleniaceae|Rubiaceae|Rosaceae	4	Vitales|Dilleniales|Gentianales|Rosales	1	Spermacoce	1	Spermacoce sp.	1	Rubiaceae	1	Gentianales
Sphingidae	Macroglossinae	Dilophonotini	Enyo	Enyo ocypete	10	Curatella|Davilla|Doliocarpus|Tetracera|Saurauia|Buddleja|Ludwigia|Cissus|Vitis|Pinzona	31	Curatella americana|Davilla kunthii|Davilla nitida|Davilla rugosa|Doliocarpus dentatus|Doliocarpus multiflorus|Tetracera|Tetracera hydrophila|Tetracera volubilis|Saurauia montana|Buddleja davidii|Ludwigia|Ludwigia foliobracteolata|Ludwigia leptocarpa|Ludwigia octovalvis|Cissus|Cissus alata|Cissus erosa|Cissus fuliginea|Cissus verticillata|Vitis vinifera|Vitis|Davilla sp.|Cissus sp.|Pinzona coriac…	5	Scrophulariaceae|Vitaceae|Dilleniaceae|Onagraceae|Actinidiaceae	5	Lamiales|Vitales|Dilleniales|Myrtales|Ericales
Sphingidae	Macroglossinae	Dilophonotini	Erinnyis		1	Sapium	1	Sapium laurifolium	1	Euphorbiaceae	1	Malpighiales
Sphingidae	Macroglossinae	Dilophonotini	Erinnyis	Erinnyis alope	11	Allamanda|Eschscholzia|Hevea|Jatropha|Manihot|Carica|Jacaratia|Thevetia|Chamaesyce|Euphorbia|Hura	18	Allamanda|Eschscholzia californica|Hevea brasiliensis|Jatropha|Jatropha curcas|Manihot aesculifolia|Manihot esculenta|Carica microcarpa|Carica papaya|Jacaratia dolichaula|Manihot utilissima|Jatropha sp.|Allamanda sp.|Thevetia ovata|Jacaratia spinosa|Chamaesyce hyssopifolia|Euphorbia pulcherrima|Hura crepitans	4	Apocynaceae|Caricaceae|Euphorbiaceae|Papaveraceae	4	Gentianales|Brassicales|Malpighiales|Ranunculales
Sphingidae	Macroglossinae	Dilophonotini	Erinnyis	Erinnyis crameri	5	Rauvolfia|Stemmadenia|Tabernaemontana|Manihot|Macropharynx	12	Rauvolfia ligustrina|Rauvolfia tetraphylla|Stemmadenia|Stemmadenia obovata|Tabernaemontana|Tabernaemontana alba|Tabernaemontana oppositifolia|Manihot esculenta|Tabernaemontana spp.|Macropharynx renteriae|Stemmadenia donnellsmithii|Stemmadenia robinsonii	2	Apocynaceae|Euphorbiaceae	2	Gentianales|Malpighiales
Sphingidae	Macroglossinae	Dilophonotini	Erinnyis	Erinnyis ello	39	Chrysophyllum|Manilkara|Pouteria|Sideroxylon|Forsteronia|Thevetia|Araujia|Morrenia|Sesamum|Nicotiana|Solanum|Allium|Licania|Aleurites|Cnidoscolus|Codiaeum|Euphorbia|Hevea|Hippomane|Hura|Jatropha|Mabea|Manihot|Pedilanthus|Sapium|Sebastiania|Ficus|Urera|Carica|Gossypium|Heliocarpus|Conocarpus|Vitis|Ricinus|Psidium|Poinsettia|Chamaesyce|Jacaratia|Euphorbiaceae	73	Chrysophyllum brenesii|Chrysophyllum oliviforme|Manilkara chicle|Pouteria caimito|Sideroxylon celastrinum|Sideroxylon obtusifolium|Sideroxylon salicifolium|Forsteronia spicata|Thevetia|Araujia sericifera|Morrenia|Sesamum indicum|Nicotiana tabacum|Solanum|Solanum lycopersicum|Allium cepa|Licania arborea|Aleurites moluccana|Cnidoscolus|Cnidoscolus angustidens|Cnidoscolus fragrans|Cnidoscolus urens|…	14	Euphorbiaceae|Amaryllidaceae|Apocynaceae|Caricaceae|Sapotaceae|Combretaceae|Moraceae|Malvaceae|Chrysobalanaceae|Solanaceae|Myrtaceae|Pedaliaceae|Urticaceae|Vitaceae	11	Malpighiales|Asparagales|Gentianales|Brassicales|Ericales|Myrtales|Rosales|Malvales|Solanales|Lamiales|Vitales	2	Euphorbia|Ricinus	2	Euphorbia pulcherrima|Ricinus communis	1	Euphorbiaceae	1	Malpighiales
Sphingidae	Macroglossinae	Dilophonotini	Erinnyis	Erinnyis impunctata	1	Morrenia	1	Morrenia sp.	1	Apocynaceae	1	Gentianales
Sphingidae	Macroglossinae	Dilophonotini	Erinnyis	Erinnyis lassauxii	13	Amblyopetalum|Araujia|Asclepias|Gonolobus|Macroscepis|Marsdenia|Matelea|Morrenia|Sarcostemma|Carica|Omphalea|Angelica|Blepharodon	17	Amblyopetalum coccineum|Araujia sericifera|Asclepias curassavica|Gonolobus barbatus|Macroscepis hirsuta|Macroscepis obovata|Marsdenia engleriana|Matelea|Morrenia|Sarcostemma cynanchoides|Carica papaya|Omphalea|Morrenia sp.|Angelica doar|Matelea reticulata|Gonobolus barbatus|Blepharodon mucronatum	4	Apocynaceae|Apiaceae|Caricaceae|Euphorbiaceae	4	Gentianales|Apiales|Brassicales|Malpighiales
Sphingidae	Macroglossinae	Dilophonotini	Erinnyis	Erinnyis obscura	13	Sarcostemma|Mesechites|Araujia|Blepharodon|Cynanchum|Gonolobus|Morrenia|Philibertia|Euphorbia|Hevea|Manihot|Nerium|Tabernaemontana	23	Sarcostemma angustissimum|Mesechites|Araujia sericifera|Blepharodon mucronatum|Cynanchum angustifolium|Cynanchum barbigerum|Gonolobus|Morrenia|Morrenia brachystephana|Philibertia|Sarcostemma clausum|Sarcostemma cynanchoides|Sarcostemma heterophyllum|Euphorbia pulcherrima|Hevea brasiliensis|Manihot esculenta|Nerium oleander|Tabernaemontana australis|Cynanchum parviflorum|Gonolobus sp.|Sarcostemma …	2	Apocynaceae|Euphorbiaceae	2	Gentianales|Malpighiales
Sphingidae	Macroglossinae	Dilophonotini	Erinnyis	Erinnyis oenotrus	17	Amblyopetalum|Araujia|Asclepias|Echites|Euphorbia|Forsteronia|Hevea|Lacmellea|Mandevilla|Manihot|Mesechites|Morrenia|Nerium|Stemmadenia|Tabernaemontana|Thevetia|Zschokkea	18	Amblyopetalum coccineum|Araujia sericifera|Asclepias curassavica|Echites sp.|Euphorbia ovalifolia|Forsteronia spicata|Hevea brasiliensis|Lacmellea sp.|Lacmellea panamensis|Mandevilla villosa|Manihot esculenta|Mesechites trifida|Morrenia sp.|Nerium oleander|Stemmadenia obovata|Tabernaemontana|Thevetia ovata|Zschokkea sp.	2	Apocynaceae|Euphorbiaceae	2	Gentianales|Malpighiales
Sphingidae	Macroglossinae	Macroglossini	Euchloron	Euchloron megaera	5	Vitis|Cissus|Parthenocissus|Rhoicissus|Ampelopsis	11	Vitis|Cissus|Cissus petiolata|Cissus trothae|Parthenocissus quinquefolia|Rhoicissus tridentata|Vitis arguta|Vitis vinifera|Vitis sp.|Ampelopsis sp.|Cissus arguta	1	Vitaceae	1	Vitales
Sphingidae	Macroglossinae	Dilophonotini	Eumorpha	Eumorpha achemon	5	Solanum|Ampelopsis|Parthenocissus|Vitis|Cissus	12	Solanum lycopersicum|Ampelopsis brevipedunculata|Parthenocissus|Parthenocissus quinquefolia|Vitis|Vitis arizonica|Vitis vinifera|Vitis vulpina|Vitis sp.|Ampelopsis sp.|Cyssus sp.|Parthenocissus sp.	2	Vitaceae|Solanaceae	2	Vitales|Solanales	1	Vitis	1	Vitis sp.	1	Vitaceae	1	Vitales
Sphingidae	Macroglossinae	Dilophonotini	Eumorpha	Eumorpha adamsi	1	Cissus	1	Cissus erosa	1	Vitaceae	1	Vitales
Sphingidae	Macroglossinae	Dilophonotini	Eumorpha	Eumorpha analis	2	Vitis|Cissus	4	Vitis|Cissus|Cissus verticillata|Vitis vinifera	1	Vitaceae	1	Vitales
Sphingidae	Macroglossinae	Dilophonotini	Eumorpha	Eumorpha anchemolus	10	Davilla|Doliocarpus|Tetracera|Saurauia|Cissus|Parthenocissus|Vitis|Ampelopsis|Pinzona|Marcgravia	24	Davilla kunthii|Davilla nitida|Doliocarpus multiflorus|Tetracera hydrophila|Saurauia yasicae|Cissus|Cissus alata|Cissus erosa|Cissus fuliginea|Cissus verticillata|Parthenocissus|Vitis|Vitis tiliifolia|Vitis vinifera|Ampelopsis sp.|Cissus sicyoides|Cissus erosus|Cissus sp.|Doliocarpus dentatus|Pinzona coriacea|Cissus biformifolia|Cissus pseudosicyoides|Cissus microcarpa|Marcgravia nepenthoides	4	Vitaceae|Dilleniaceae|Marcgraviaceae|Actinidiaceae	3	Vitales|Dilleniales|Ericales
Sphingidae	Macroglossinae	Dilophonotini	Eumorpha	Eumorpha fasciatus	5	Punica|Epilobium|Fuchsia|Ludwigia|Oenothera	23	Punica granatum|Epilobium|Fuchsia magellanica|Ludwigia|Ludwigia affinis|Ludwigia decurrens|Ludwigia latifolia|Ludwigia leptocarpa|Ludwigia linearis|Ludwigia linifolia|Ludwigia nervosa|Ludwigia octovalvis|Ludwigia peploides|Ludwigia peruviana|Ludwigia spp.|Oenothera|Ludwigia erecta|Ludwigia longifolia|Ludwigia rigida|Ludwigia hyssopifolia|Ludwigia repens|Ludwigia foliobracteolata|Ludwigia octovalv…	2	Onagraceae|Lythraceae	1	Myrtales	3	Fuchsia|Parthenocissus|Vitis	3	Fuchsia hybrida|Parthenocissus|Vitis sp.	2	Onagraceae|Vitaceae	2	Myrtales|Vitales
Sphingidae	Macroglossinae	Dilophonotini	Eumorpha	Eumorpha intermedia	1	Ampelopsis	1	Ampelopsis arborea	1	Vitaceae	1	Vitales
Sphingidae	Macroglossinae	Dilophonotini	Eumorpha	Eumorpha labruscae	8	Vitis|Eupatorium|Magnolia|Ludwigia|Oenothera|Cissus|Parthenocissus|Ampelopsis	22	Vitis|Vitis vinifera|Eupatorium odoratum|Magnolia|Ludwigia|Oenothera|Cissus|Cissus alata|Cissus erosa|Cissus fuliginea|Cissus incisa|Cissus verticillata|Parthenocissus|Vitis labrusca|Vitis tiliifolia|Ampelopsis sp.|Cissus erosus|Cissus sicyoides|Parthenocissus sp.|Vitis sp.|Cissus biformifolia|Cissus pseudosicyoides	4	Vitaceae|Asteraceae|Onagraceae|Magnoliaceae	4	Vitales|Asterales|Myrtales|Magnoliales
Sphingidae	Macroglossinae	Dilophonotini	Eumorpha	Eumorpha megaeacus	2	Doliocarpus|Ludwigia	9	Doliocarpus multiflorus|Ludwigia|Ludwigia leptocarpa|Ludwigia octovalvis|Ludwigia suffruticosa|Ludwigia stenorraphe|Ludwigia affinis|Ludwigia foliobracteolata|Ludwigia nervosa	2	Dilleniaceae|Onagraceae	2	Dilleniales|Myrtales
Sphingidae	Macroglossinae	Dilophonotini	Eumorpha	Eumorpha obliquus	3	Cissus|Sarcopera|Schwartzia	4	Cissus verticillata|Cissus sicyoides|Sarcopera sessiliflora|Schwartzia costaricensis	2	Vitaceae|Marcgraviaceae	2	Vitales|Ericales
Sphingidae	Macroglossinae	Dilophonotini	Eumorpha	Eumorpha pandorus	3	Ampelopsis|Parthenocissus|Vitis	8	Ampelopsis|Parthenocissus|Parthenocissus quinquefolia|Vitis riparia|Vitis vinifera|Vitis|Vitis sp.|Ampelopsis sp.	1	Vitaceae	1	Vitales
Sphingidae	Macroglossinae	Dilophonotini	Eumorpha	Eumorpha phorbas	3	Sarcopera|Marcgravia|Schwartzia	3	Sarcopera sessiliflora|Marcgravia nepenthoides|Schwartzia costaricensis	1	Marcgraviaceae	1	Ericales
Sphingidae	Macroglossinae	Dilophonotini	Eumorpha	Eumorpha satellitia	7	Parthenocissus|Tetracera|Ampelopsis|Cissus|Vitis|Davilla|Doliocarpus	20	Parthenocissus|Tetracera|Ampelopsis|Cissus|Cissus alata|Cissus fuliginea|Cissus verticillata|Vitis|Vitis labrusca|Vitis tiliifolia|Vitis vinifera|Vitis sp.|Ampelopsis sp.|Cissus sicyoides|Ampelopsis arborea|Cissus sp.|Cissus rhombifolia|Davilla kunthii|Doliocarpus multiflorus|Cissus pseudosicyoides	2	Vitaceae|Dilleniaceae	2	Vitales|Dilleniales
Sphingidae	Macroglossinae	Dilophonotini	Eumorpha	Eumorpha triangulum	3	Doliocarpus|Tetracera|Saurauia	5	Doliocarpus multiflorus|Tetracera hydrophila|Saurauia aequatoriensis|Saurauia montana|Saurauia yasicae	2	Dilleniaceae|Actinidiaceae	2	Dilleniales|Ericales
Sphingidae	Macroglossinae	Dilophonotini	Eumorpha	Eumorpha typhon	3	Vitis|Parthenocissus|Cissus	4	Vitis arizonica|Parthenocissus quinquefolia|Cyssus sp.|Parthenocissus sp.	1	Vitaceae	1	Vitales
Sphingidae	Macroglossinae	Dilophonotini	Eumorpha	Eumorpha vitis	6	Cissus|Ludwigia|Parthenocissus|Vitis|Ampelopsis|Tetracera	18	Cissus|Ludwigia peruviana|Cissus alata|Cissus erosa|Cissus fuliginea|Cissus incisa|Cissus verticillata|Parthenocissus|Parthenocissus quinquefolia|Parthenocissus tricuspidata|Vitis|Vitis vinifera|Vitis sp.|Cissus sicyoides|Cissus trifoliata|Ampelopsis arborea|Tetracera hydrophila|Cissus biformifolia	3	Vitaceae|Onagraceae|Dilleniaceae	3	Vitales|Myrtales|Dilleniales	2	Vitis|Parthenocissus	3	Vitis vinifera|Parthenocissus|Vitis sp.	1	Vitaceae	1	Vitales
Sphingidae	Macroglossinae	Macroglossini	Eupanacra	Eupanacra automedon	1	Lasia	1	Lasia spinosa	1	Araceae	1	Alismatales
Sphingidae	Macroglossinae	Macroglossini	Eupanacra	Eupanacra busiris	2	Pothos|Lasia	4	Pothos scandens|Lasia spinosa|Pothos chinensis|Pothos sp.	1	Araceae	1	Alismatales
Sphingidae	Macroglossinae	Macroglossini	Eupanacra	Eupanacra elegantulus	8	Aglaonema|Alocasia|Amorphophallus|Caladium|Colocasia|Homalomena|Lasia|Dieffenbachia	13	Aglaonema pictum|Alocasia crassifolia|Alocasia robusta|Amorphophallus variabilis|Caladium bicolor|Colocasia esculenta|Homalomena alba|Lasia|Caladium|Dieffenbachia|Homalomena propinqua|Homalonema alba|Caladium sp.	1	Araceae	1	Alismatales
Sphingidae	Macroglossinae	Macroglossini	Eupanacra	Eupanacra hollowayi	1	Scindapsus	1	Scindapsus	1	Araceae	1	Alismatales
Sphingidae	Macroglossinae	Macroglossini	Eupanacra	Eupanacra malayana	1	Curculigo	2	Curculigo sp.|Curculigo latifolia	1	Hypoxidaceae	1	Asparagales
Sphingidae	Macroglossinae	Macroglossini	Eupanacra	Eupanacra metallica	1	Arisaema	2	Arisaema tortuosum|Arisaema curvatum	1	Araceae	1	Alismatales
Sphingidae	Macroglossinae	Macroglossini	Eupanacra	Eupanacra micholitzi									1	Epipremnum	1	Epipremnum pinnatum	1	Araceae	1	Alismatales
Sphingidae	Macroglossinae	Macroglossini	Eupanacra	Eupanacra mydon	10	Alocasia|Amorphophallus|Arisaema|Caladium|Colocasia|Scindapsus|Syngonium|Pothos|Cayratia|Vitis	17	Alocasia cucullata|Alocasia macrorrhizos|Amorphophallus|Arisaema erubescens|Caladium|Colocasia esculenta|Scindapsus pictus|Syngonium podophyllum|Amorphophallus variabilis|Pothos chinensis|Pothos scandens|Cayratia japonica|Arisaema consanguineum|Amorphophallus spp.|Colocasia spp.|Pothos sp.|Vitis tenuifolia	2	Araceae|Vitaceae	2	Alismatales|Vitales
Sphingidae	Macroglossinae	Macroglossini	Eupanacra	Eupanacra pulchella									1	Epipremnum	1	Epipremnum pinnatum	1	Araceae	1	Alismatales
Sphingidae	Macroglossinae	Macroglossini	Eupanacra	Eupanacra regularis	1	Scindapsus	1	Scindapsus sp	1	Araceae	1	Alismatales
Sphingidae	Macroglossinae	Macroglossini	Eupanacra	Eupanacra splendens	3	Epipremnum|Monstera|Rhaphidophora	3	Epipremnum pinnatum|Monstera deliciosa|Rhaphidophora australasica	1	Araceae	1	Alismatales
Sphingidae	Macroglossinae	Macroglossini	Eupanacra	Eupanacra tiridates	2	Hedyotis|Epipremnum	2	Hedyotis sp.|Epipremnum pinnatum	2	Araceae|Rubiaceae	2	Alismatales|Gentianales
Sphingidae	Macroglossinae	Macroglossini	Eupanacra	Eupanacra variegata	7	Alocasia|Epipremnum|Homalomena|Philodendron|Rhaphidophora|Scindapsus|Caladium	10	Alocasia macrorrhizos|Alocasia sanderiana|Epipremnum|Epipremnum pinnatum|Homalomena philippinensis|Philodendron plowmanii|Rhaphidophora|Scindapsus|Caladium|Philodendron	1	Araceae	1	Alismatales
Sphingidae	Macroglossinae	Macroglossini	Eupanacra	Eupanacra variolosa	2	Epipremnum|Scindapsus	4	Epipremnum aureum|Scindapsus hederaceus|Scindapsus pictus|Scindapsus sp	1	Araceae	1	Alismatales	1	Scindapsus	1	Scindapsus sp.	1	Araceae	1	Alismatales
Sphingidae	Macroglossinae	Dilophonotini	Euproserpinus	Euproserpinus euterpe	1	Camissonia	3	Camissonia campestris|Camissonia strigulosa|Camissonia contorta	1	Onagraceae	1	Myrtales
Sphingidae	Macroglossinae	Dilophonotini	Euproserpinus	Euproserpinus phaeton	3	Camissonia|Oenothera|Coreopsis	6	Camissonia bistorta|Oenothera deltoides|Coreopsis bigelovii|Camissonia dentata|Oenothera|Camissonia contorta	2	Onagraceae|Asteraceae	2	Myrtales|Asterales	1	Oenothera	1	Oenothera elata	1	Onagraceae	1	Myrtales
Sphingidae	Macroglossinae	Dilophonotini	Euproserpinus	Euproserpinus wiesti	1	Oenothera	2	Oenothera lartifolia|Oenothera deltoides	1	Onagraceae	1	Myrtales
Sphingidae	Macroglossinae	Dilophonotini	Eupyrrhoglossum	Eupyrrhoglossum sagra	6	Chomelia|Gonzalagunia|Guettarda|Randia|Sabicea|Arachnothryx	17	Chomelia microloba|Chomelia ribesioides|Chomelia spinosa|Gonzalagunia|Guettarda|Guettarda foliacea|Guettarda macrosperma|Guettarda scabra|Randia|Sabicea panamensis|Sabicea villosa|Sabicea aspera|Guettarda macrocarpa|Arachnothryx buddleioides|Guettarda crispiflora|Randia armata|Randia monantha	1	Rubiaceae	1	Gentianales	1	Sabicea	1	Sabicea aspera	1	Rubiaceae	1	Gentianales
Sphingidae	Sphinginae	Sphingini	Euryglottis		1	Citharexylum	1	Citharexylum sp.	1	Verbenaceae	1	Lamiales
Sphingidae	Sphinginae	Sphingini	Euryglottis	Euryglottis davidianus	1	Bignonia	1	Bignonia sp.	1	Bignoniaceae	1	Lamiales
Sphingidae	Sphinginae	Sphingini	Euryglottis	Euryglottis oliver	1	Bignonia	1	Bignonia sp.	1	Bignoniaceae	1	Lamiales
Sphingidae	Macroglossinae	Macroglossini	Eurypteryx	Eurypteryx bhaga	1	Alstonia	1	Alstonia scholaris	1	Apocynaceae	1	Gentianales
Sphingidae	Smerinthinae	Incertae Sedis	Falcatula	Falcatula falcatus	2	Erythrina|Sclerocarya	4	Erythrina abyssinica|Erythrina excelsa|Sclerocarya caffra|Sclerocaraya caffra	2	Fabaceae|Anacardiaceae	2	Fabales|Sapindales
Sphingidae	Macroglossinae	Macroglossini	Gnathothlibus	Gnathothlibus eras	12	Dillenia|Hibbertia|Escallonia|Morinda|Pavetta|Pentas|Ipomoea|Melastoma|Cayratia|Cissus|Parthenocissus|Vitis	23	Dillenia alata|Hibbertia scandens|Escallonia rubra|Morinda citrifolia|Pavetta australiensis|Pentas lanceolata|Ipomoea batatas|Melastoma affine|Cayratia|Cayratia acris|Cayratia clematidea|Cayratia trifolia|Cissus|Cissus alata|Cissus antarctica|Cissus oblonga|Cissus opaca|Cissus repens|Parthenocissus quinquefolia|Parthenocissus tricuspidata|Vitis|Vitis vinifera|Ipomoea alba	6	Vitaceae|Dilleniaceae|Escalloniaceae|Convolvulaceae|Melastomataceae|Rubiaceae	6	Vitales|Dilleniales|Escalloniales|Solanales|Myrtales|Gentianales
Sphingidae	Macroglossinae	Macroglossini	Gnathothlibus	Gnathothlibus erotus	11	Vitis|Ipomoea|Dillenia|Hibbertia|Escallonia|Melastoma|Pentas|Cayratia|Cissus|Parthenocissus|Geissois	19	Vitis sp.|Ipomoea batatas|Dillenia alata|Hibbertia scandens|Escallonia macrantha|Melastoma affine|Pentas lanceolata|Cayratia acris|Cayratia clematidea|Cayratia trifolia|Cissus antarctica|Cissus oblonga|Cissus opacea|Cissus repens|Cissus rhombifolia|Parthenocissus quinquefolia|Parthenocissus tricuspidata|Vitis vinifera|Geissois racemosa	7	Vitaceae|Dilleniaceae|Escalloniaceae|Cunoniaceae|Convolvulaceae|Melastomataceae|Rubiaceae	7	Vitales|Dilleniales|Escalloniales|Oxalidales|Solanales|Myrtales|Gentianales
Sphingidae	Macroglossinae	Macroglossini	Gnathothlibus	Gnathothlibus salesnei	10	Hibbertia|Tetracera|Morinda|Pentas|Ipomoea|Garcinia|Geissois|Cissus|Ochrosia|Vitis	10	Hibbertia scandens|Tetracera billardieri|Morinda citrifolia|Pentas lanceolata|Ipomoea batatas|Garcinia balansae|Geissois racemosa|Cissus repens|Ochrosia oppositifolia|Vitis vinifera	7	Vitaceae|Clusiaceae|Cunoniaceae|Dilleniaceae|Convolvulaceae|Rubiaceae|Apocynaceae	6	Vitales|Malpighiales|Oxalidales|Dilleniales|Solanales|Gentianales
Sphingidae	Macroglossinae	Macroglossini	Hayesiana	Hayesiana triopus	1	Adina	2	Adina pilulifera|Adina globifera	1	Rubiaceae	1	Gentianales
Sphingidae	Macroglossinae	Hemarini	Hemaris	Hemaris affinis	8	Diervilla|Lonicera|Weigela|Patrinia|Galium|Randia|Rubia|Lychnis	12	Diervilla|Lonicera|Lonicera japonica|Lonicera maackii|Weigela coraeensis|Weigela hortensis|Patrinia scabiosaefolia|Galium aparine|Galium kinuta|Randia|Rubia|Lychnis senno	3	Caprifoliaceae|Rubiaceae|Caryophyllaceae	3	Dipsacales|Gentianales|Caryophyllales	2	Lonicera|Symphoricarpos	4	Lonicera caprifolium|Lonicera periclymenum|Lonicera xylosteum|Symphoricarpos albus	1	Caprifoliaceae	1	Dipsacales
Sphingidae	Macroglossinae	Hemarini	Hemaris	Hemaris aksana	1	Scabiosa	1	Scabiosa sp.	1	Caprifoliaceae	1	Dipsacales
Sphingidae	Macroglossinae	Hemarini	Hemaris	Hemaris croatica	5	Lonicera|Cephalaria|Scabiosa|Asperula|Plocama	8	Lonicera|Cephalaria coriacea|Cephalaria leucantha|Cephalaria uralensis|Scabiosa argentea|Scabiosa ochroleuca|Asperula|Plocama calabrica	2	Rubiaceae|Caprifoliaceae	2	Gentianales|Dipsacales	3	Cephalaria|Dipsacus|Plocama	4	Cephalaria leucantha|Dipsacus dipsacoides|Dipsacus fullonum|Plocama calabrica	2	Caprifoliaceae|Rubiaceae	2	Dipsacales|Gentianales
Sphingidae	Macroglossinae	Hemarini	Hemaris	Hemaris diffinis	10	Vaccinium|Lonicera|Symphoricarpos|Triosteum|Amsonia|Apocynum|Clarkia|Gayophytum|Viburnum|Diervilla	22	Vaccinium stamineum|Lonicera|Lonicera ligustrina|Lonicera sempervirens|Symphoricarpos|Symphoricarpos albus|Symphoricarpos orbiculatus|Symphoricarpos racemosus|Triosteum perfoliatum|Amsonia angustifolia|Amsonia latifolia|Apocynum androsaemifolium|Apocynum cannabinum|Clarkia rhomboidea|Gayophytum diffusum|Viburnum|Diervilla lonicera|Diervilla trifida|Lonicera subspicata|Amsonia tabernaemontana|Loni…	5	Apocynaceae|Onagraceae|Caprifoliaceae|Ericaceae|Adoxaceae	4	Gentianales|Myrtales|Dipsacales|Ericales	2	Lonicera|Symphoricarpos	3	Lonicera tatarica|Symphoricarpos racemosus|Lonicera sempervirens	1	Caprifoliaceae	1	Dipsacales
Sphingidae	Macroglossinae	Hemarini	Hemaris	Hemaris ducalis	1	Lonicera	5	Lonicera|Lonicera caerulea|Lonicera korolkowii|Lonicera nummulariifolia|Lonicera seravschanica	1	Caprifoliaceae	1	Dipsacales
Sphingidae	Macroglossinae	Hemarini	Hemaris	Hemaris fuciformis	9	Deutzia|Lonicera|Symphoricarpos|Cephalaria|Knautia|Galium|Rubia|Lychnis|Silene	28	Deutzia|Lonicera|Lonicera acuminata|Lonicera alpigena|Lonicera caerulea|Lonicera caprifolium|Lonicera nigra|Lonicera pallasii|Lonicera periclymenum|Lonicera tatarica|Lonicera xylosteum|Symphoricarpos albus|Symphoricarpos racemosus|Symphoricarpos rivularis|Cephalaria procera|Knautia|Knautia arvensis|Galium|Galium mollugo|Galium verum|Rubia peregrina|Galium aparine|Lychnis flos-cuculi|Silene dioica…	4	Caprifoliaceae|Hydrangeaceae|Rubiaceae|Caryophyllaceae	4	Dipsacales|Cornales|Gentianales|Caryophyllales	2	Viburnum|Lonicera	2	Viburnum sp.|Lonicera caprifolium	2	Caprifoliaceae|Adoxaceae	1	Dipsacales
Sphingidae	Macroglossinae	Hemarini	Hemaris	Hemaris gracilis	1	Vaccinium	3	Vaccinium sp.|Vaccinium pallidum|Vaccinium angustifolium	1	Ericaceae	1	Ericales	1	Vaccinium	2	Vaccinium corymbosum|Vaccinium pallidum	1	Ericaceae	1	Ericales
Sphingidae	Macroglossinae	Hemarini	Hemaris	Hemaris ottonis	1	Lonicera	1	Lonicera japonica	1	Caprifoliaceae	1	Dipsacales
Sphingidae	Macroglossinae	Hemarini	Hemaris	Hemaris radians	3	Lonicera|Patrinia|Rubia	4	Lonicera japonica|Patrinia scabiosaefolia|Patrinia villosa|Rubia cordifolia	2	Caprifoliaceae|Rubiaceae	2	Dipsacales|Gentianales
Sphingidae	Macroglossinae	Hemarini	Hemaris	Hemaris saundersii	1	Lonicera	1	Lonicera quinquelocularis	1	Caprifoliaceae	1	Dipsacales
Sphingidae	Macroglossinae	Hemarini	Hemaris	Hemaris staudingeri	1	Lonicera	1	Lonicera japonica	1	Caprifoliaceae	1	Dipsacales
Sphingidae	Macroglossinae	Hemarini	Hemaris	Hemaris thetis	3	Gaultheria|Lonicera|Symphoricarpos	5	Gaultheria hispidula|Lonicera ligustrina|Symphoricarpos|Symphoricarpos mollis|Symphoricarpos racemosus	2	Ericaceae|Caprifoliaceae	2	Ericales|Dipsacales
Sphingidae	Macroglossinae	Hemarini	Hemaris	Hemaris thysbe	7	Viburnum|Abelia|Lonicera|Symphoricarpos|Crataegus|Prunus|Vaccinium	15	Viburnum|Viburnum nudum|Abelia|Lonicera|Symphoricarpos|Symphoricarpos racemosus|Crataegus|Prunus|Viburnum dentatum|Viburnum opulus|Viburnum sp.|Vaccinium sp.|Lonicera sp.|Symphoricarpos sp.|Crataegus sp.	4	Caprifoliaceae|Rosaceae|Ericaceae|Adoxaceae	3	Dipsacales|Rosales|Ericales	1	Viburnum	2	Viburnum lentago|Viburnum nudum	1	Adoxaceae	1	Dipsacales
Sphingidae	Macroglossinae	Hemarini	Hemaris	Hemaris tityus	8	Lonicera|Symphoricarpos|Dipsacus|Knautia|Scabiosa|Succisa|Galium|Lychnis	18	Lonicera|Lonicera periclymenum|Lonicera xylosteum|Symphoricarpos racemosus|Dipsacus fullonum|Knautia arvensis|Knautia drymeia|Scabiosa|Scabiosa atropurpurea|Scabiosa columbaria|Scabiosa ochroleuca|Scabiosa tatarica|Scabiosa turolensis|Succisa pratensis|Galium|Galium mollugo|Galium verum|Lychnis	3	Caprifoliaceae|Rubiaceae|Caryophyllaceae	3	Dipsacales|Gentianales|Caryophyllales	2	Cephalaria|Scabiosa	3	Cephalaria gigantea|Scabiosa sp.|Scabiosa caucasica	1	Caprifoliaceae	1	Dipsacales
Sphingidae	Macroglossinae	Dilophonotini	Hemeroplanes	Hemeroplanes	1	Lacmellea	1	Lacmellea sp.	1	Apocynaceae	1	Gentianales
Sphingidae	Macroglossinae	Dilophonotini	Hemeroplanes	Hemeroplanes ornatus	7	Echites|Forsteronia|Lacmellea|Mandevilla|Zschokkea|Amblianthera|Tassadia	8	Forsteronia spicata|Lacmellea sp.|Mandevilla versicolor|Echites sp.|Amblianthera versicolor|Zschokkea sp.|Lacmellea panamensis|Tassadia obovata	1	Apocynaceae	1	Gentianales
Sphingidae	Macroglossinae	Dilophonotini	Hemeroplanes	Hemeroplanes triptolemus	11	Condylocarpon|Echites|Lacmellea|Mandevilla|Mesechites|Prestonia|Fischeria|Zschokkea|Amblianthera|Forsteronia|Tassadia	17	Condylocarpon sp.|Lacmellea sp.|Mandevilla sp.|Mandevilla subsagittata|Mandevilla versicolor|Mesechites trifida|Prestonia quinquangularis|Fischeria sp.|Zschokkea sp|Echites sp.|Amblianthera versicolor|Prestonia quadrangularis|Fischeria panamensis|Forsteronia spicata|Mandevilla villosa|Mandevilla hirsuta|Tassadia obovata	1	Apocynaceae	1	Gentianales
Sphingidae	Macroglossinae	Macroglossini	Hippotion	Hippotion aurora	1	Pisonia	1	Pisonia calpidia	1	Nyctaginaceae	1	Caryophyllales
Sphingidae	Macroglossinae	Macroglossini	Hippotion	Hippotion balsaminae	5	Impatiens|Ipomoea|Anchomanes|Typhonodorum|Ludwigia	13	Impatiens|Ipomoea cairica|Ipomoea involucrata|Anchomanes difformis|Typhonodorum lindleyanum|Ludwigia affinis|Ludwigia erecta|Ludwigia repens|Ludwigia stenorraphe|Ludwigia suffruticosa|Ludwigia _adscendens|Impatiens sp.|Ludwigia octovalvis	4	Araceae|Balsaminaceae|Convolvulaceae|Onagraceae	4	Alismatales|Ericales|Solanales|Myrtales
Sphingidae	Macroglossinae	Macroglossini	Hippotion	Hippotion boerhaviae	21	Hedyotis|Boerhavia|Impatiens|Camellia|Knoxia|Morinda|Ophiorrhiza|Pentas|Spermacoce|Microcarpaea|Ipomoea|Amaranthus|Mirabilis|Portulaca|Colocasia|Dioscorea|Citrullus|Arachis|Cissus|Glossostigma|Oldenlandia	29	Hedyotis|Hedyotis auricularia|Boerhavia diffusa|Impatiens balsamina|Camellia sinensis|Knoxia mollis|Morinda|Ophiorrhiza|Pentas lanceolata|Spermacoce articularis|Spermacoce ocymoides|Spermacoce stricta|Microcarpaea spathulatum|Ipomoea|Amaranthus spinosus|Boerhavia repens|Mirabilis jalapa|Portulaca oleracea|Colocasia esculenta|Dioscorea alata|Citrullus lanatus|Arachis hypogaea|Cissus|Spermacoce spp…	14	Amaranthaceae|Fabaceae|Nyctaginaceae|Theaceae|Vitaceae|Cucurbitaceae|Araceae|Dioscoreaceae|Phrymaceae|Rubiaceae|Balsaminaceae|Convolvulaceae|Plantaginaceae|Portulacaceae	10	Caryophyllales|Fabales|Ericales|Vitales|Cucurbitales|Alismatales|Dioscoreales|Lamiales|Gentianales|Solanales	1	Pentas	1	Pentas lanceolata	1	Rubiaceae	1	Gentianales
Sphingidae	Macroglossinae	Macroglossini	Hippotion	Hippotion brennus	7	Hibbertia|Coelospermum|Pentas|Colocasia|Epipremnum|Sorghum|Pogonolobus	7	Hibbertia scandens|Coelospermum reticulatum|Pentas lanceolata|Colocasia|Epipremnum pinnatum|Sorghum bicolor|Pogonolobus reticulatus	4	Rubiaceae|Araceae|Dilleniaceae|Poaceae	4	Gentianales|Alismatales|Dilleniales|Poales
Sphingidae	Macroglossinae	Macroglossini	Hippotion	Hippotion brunnea									1	Impatiens	1	Impatiens sp.	1	Balsaminaceae	1	Ericales
Sphingidae	Macroglossinae	Macroglossini	Hippotion	Hippotion celerio	72	Hibbertia|Impatiens|Hedera|Lonicera|Plumeria|Galium|Hamelia|Hedyotis|Morinda|Paederia|Pentas|Rubia|Spermacoce|Podranea|Syringa|Linaria|Scrophularia|Verbascum|Ipomoea|Nicotiana|Solanum|Beta|Boerhavia|Commicarpus|Mirabilis|Emex|Oxygonum|Rheum|Rumex|Alocasia|Amorphophallus|Anchomanes|Caladium|Colocasia|Cryptocoryne|Dracunculus|Epipremnum|Philodendron|Pothos|Typhonium|Typhonodorum|Xanthosoma|Zantedes…	133	Hibbertia scandens|Impatiens|Impatiens balsamina|Impatiens oliveri|Impatiens walleriana|Hedera|Lonicera|Plumeria rubra|Galium|Galium mollugo|Galium verum|Hamelia patens|Hedyotis|Morinda citrifolia|Paederia foetida|Pentas lanceolata|Rubia cordifolia|Spermacoce articularis|Podranea brycei|Podranea ricasoliana|Syringa vulgaris|Linaria|Scrophularia|Verbascum ramosissima|Ipomoea aquatica|Ipomoea batat…	27	Fabaceae|Araceae|Vitaceae|Begoniaceae|Amaranthaceae|Nyctaginaceae|Onagraceae|Convolvulaceae|Apiaceae|Dioscoreaceae|Polygonaceae|Moraceae|Rubiaceae|Malvaceae|Araliaceae|Dilleniaceae|Balsaminaceae|Plantaginaceae|Caprifoliaceae|Euphorbiaceae|Solanaceae|Geraniaceae|Apocynaceae|Bignoniaceae|Scrophulariaceae|Poaceae|Oleaceae	19	Fabales|Alismatales|Vitales|Cucurbitales|Caryophyllales|Myrtales|Solanales|Apiales|Dioscoreales|Rosales|Gentianales|Malvales|Dilleniales|Ericales|Lamiales|Dipsacales|Malpighiales|Geraniales|Poales	17	Arbutus|Aster|Helianthus|Lactuca|Pentas|Spermacoce|Commicarpus|Mirabilis|Pelargonium|Chamerion|Epilobium|Fuchsia|Cissus|Parthenocissus|Vitis|Boerhavia|Pisonia	18	Arbutus unedo|Aster|Helianthus|Lactuca sativa|Pentas lanceolata|Spermacoce|Commicarpus pentandrus|Mirabilis jalapa|Pelargonium|Chamerion angustifolium|Epilobium parviflorum|Fuchsia|Cissus antarctica|Parthenocissus|Vitis|Vitis vinifera|Boerhavia diffusa|Pisonia grandis	7	Ericaceae|Asteraceae|Nyctaginaceae|Onagraceae|Vitaceae|Geraniaceae|Rubiaceae	7	Ericales|Asterales|Caryophyllales|Myrtales|Vitales|Geraniales|Gentianales
Sphingidae	Macroglossinae	Macroglossini	Hippotion	Hippotion echeclus	6	Paederia|Sesamum|Boerhavia|Monochoria|Ludwigia|Impatiens	9	Paederia|Sesamum indicum|Boerhavia diffusa|Monochoria hastata|Monochoria vaginalis|Ludwigia sp.|Monochoria spp.|Paederia sp.|Impatiens sp.	6	Nyctaginaceae|Balsaminaceae|Onagraceae|Pontederiaceae|Rubiaceae|Pedaliaceae	6	Caryophyllales|Ericales|Myrtales|Commelinales|Gentianales|Lamiales
Sphingidae	Macroglossinae	Macroglossini	Hippotion	Hippotion eson	27	Tetracera|Impatiens|Coprosma|Mitracarpus|Pentas|Spermacoce|Ipomoea|Boerhavia|Bougainvillea|Amorphophallus|Anchomanes|Caladium|Colocasia|Zantedeschia|Dioscorea|Tacca|Fuchsia|Ludwigia|Paullinia|Leea|Cissus|Cyphostemma|Parthenocissus|Vitis|Ampelopsis|Richardia|Borreria	49	Tetracera alnifolia|Impatiens balsamina|Coprosma baueri|Mitracarpus scaber|Pentas|Spermacoce compressa|Spermacoce octodon|Spermacoce scabra|Ipomoea cairica|Ipomoea involucrata|Boerhavia diffusa|Bougainvillea|Amorphophallus|Anchomanes difformis|Caladium|Colocasia|Zantedeschia|Zantedeschia aethiopica|Dioscorea alata|Tacca leontopetaloides|Fuchsia|Ludwigia affinis|Paullinia pinnata|Leea guineensis|C…	12	Araceae|Vitaceae|Nyctaginaceae|Rubiaceae|Dioscoreaceae|Onagraceae|Balsaminaceae|Convolvulaceae|Vitaceae|Sapindaceae|Taccaceae|Dilleniaceae	10	Alismatales|Vitales|Caryophyllales|Gentianales|Dioscoreales|Myrtales|Ericales|Solanales|Sapindales|Dilleniales	1	Cissus	1	Cissus sp.	1	Vitaceae	1	Vitales
Sphingidae	Macroglossinae	Macroglossini	Hippotion	Hippotion geryon	2	Amorphophallus|Typhonodorum	2	Amorphophallus abyssinicus|Typhonodorum lindleyanum	1	Araceae	1	Alismatales
Sphingidae	Macroglossinae	Macroglossini	Hippotion	Hippotion gracilis	16	Impatiens|Geniostoma|Danais|Boerhavia|Alocasia|Anthurium|Syngonium|Pelargonium|Ludwigia|Cissus|Dillenia|Colocasia|Typhonodorum|Begonia|Artocarpus|Vitis	19	Impatiens walleriana|Geniostoma borbonicum|Danais fragrans|Boerhavia coccinea|Alocasia sanderiana|Anthurium andreanum|Syngonium|Pelargonium roseum|Ludwigia octovalvis|Cissus anulata|Cissus rotundifolia|Dillenia ferruginea|Impatiens balsamina|Colocasia|Typhonodorum lindleyanum|Begonia comorensis|Artocarpus|Pelargonium|Vitis vinifera	11	Araceae|Moraceae|Begoniaceae|Nyctaginaceae|Vitaceae|Rubiaceae|Dilleniaceae|Loganiaceae|Balsaminaceae|Onagraceae|Geraniaceae	10	Alismatales|Rosales|Cucurbitales|Caryophyllales|Vitales|Gentianales|Dilleniales|Ericales|Myrtales|Geraniales
Sphingidae	Macroglossinae	Macroglossini	Hippotion	Hippotion moorei	1	Nauclea	1	Nauclea orientalis	1	Rubiaceae	1	Gentianales
Sphingidae	Macroglossinae	Macroglossini	Hippotion	Hippotion osiris	25	Impatiens|Daucus|Hedyotis|Mitracarpus|Spermacoce|Spathodea|Ipomoea|Oxygonum|Polygonum|Rumex|Amorphophallus|Anchomanes|Stylochaeton|Typhonodorum|Zantedeschia|Epilobium|Fuchsia|Ampelocissus|Cissus|Cyphostemma|Parthenocissus|Vitis|Richardia|Borreria|Oldenlandia	38	Impatiens|Impatiens balsamina|Daucus|Hedyotis corymbosa|Mitracarpus scaber|Spermacoce compressa|Spermacoce natalensis|Spermacoce scabra|Spermacoce verticillata|Spathodea campanulata|Ipomoea batatas|Ipomoea cairica|Ipomoea involucrata|Oxygonum sinuatum|Polygonum|Rumex|Amorphophallus abyssinicus|Anchomanes difformis|Stylochaeton|Typhonodorum lindleyanum|Zantedeschia aethiopica|Epilobium|Fuchsia|Amp…	9	Araceae|Vitaceae|Rubiaceae|Apiaceae|Onagraceae|Balsaminaceae|Convolvulaceae|Polygonaceae|Bignoniaceae	9	Alismatales|Vitales|Gentianales|Apiales|Myrtales|Ericales|Solanales|Caryophyllales|Lamiales	1	Pelargonium	1	Pelargonium sp.	1	Geraniaceae	1	Geraniales
Sphingidae	Macroglossinae	Macroglossini	Hippotion	Hippotion rafflesii	2	Impatiens|Amaranthus	7	Impatiens|Impatiens balsamina|Impatiens chinensis|Impatiens platypetala|Amaranthus|Impatiens spp.|Impatiens sp.	2	Amaranthaceae|Balsaminaceae	2	Caryophyllales|Ericales
Sphingidae	Macroglossinae	Macroglossini	Hippotion	Hippotion rosae	1	Cissus	2	Cissus quadrangularis|Cissus rotundifolia	1	Vitaceae	1	Vitales	1	Cissus	1	Cissus rotundifolia	1	Vitaceae	1	Vitales
Sphingidae	Macroglossinae	Macroglossini	Hippotion	Hippotion roseipennis	1	Cissus	3	Cissus quinquangularis|Cissus rotundifolia|Cissus sp.	1	Vitaceae	1	Vitales
Sphingidae	Macroglossinae	Macroglossini	Hippotion	Hippotion rosetta	11	Morinda|Paederia|Pentas|Richardia|Spermacoce|Nepenthes|Boerhavia|Mirabilis|Cayratia|Ipomoea|Borreria	17	Morinda citrifolia|Paederia scandens|Pentas lanceolata|Richardia brasiliensis|Richardia scabra|Spermacoce exserta|Spermacoce latifolia|Nepenthes mirabilis|Nepenthes rowaniae|Nepenthes tenax|Boerhavia|Mirabilis jalapa|Cayratia clematidea|Morinda umbellata|Ipomoea cairica|Borreria latifolia|Borreria sp.	5	Nyctaginaceae|Rubiaceae|Vitaceae|Convolvulaceae|Nepenthaceae	4	Caryophyllales|Gentianales|Vitales|Solanales
Sphingidae	Macroglossinae	Macroglossini	Hippotion	Hippotion scrofa	19	Impatiens|Xanthium|Coprosma|Hedyotis|Manettia|Pentas|Rubia|Spermacoce|Olea|Ipomoea|Polygonum|Macadamia|Epilobium|Fuchsia|Citrus|Cayratia|Cissus|Vitis|Dahlia	28	Impatiens balsamina|Impatiens oliveri|Impatiens walleriana|Xanthium spinosum|Coprosma baueri|Coprosma repens|Hedyotis|Manettia inflata|Pentas lanceolata|Rubia tinctorum|Spermacoce assurgens|Spermacoce exserta|Olea europaea|Ipomoea batatas|Polygonum arenastrum|Macadamia ternifolia|Epilobium billardieranum|Fuchsia|Citrus medica|Cayratia clematidea|Cissus oblonga|Vitis vinifera|Dahlia spp.|Impatiens…	10	Vitaceae|Rutaceae|Rubiaceae|Asteraceae|Onagraceae|Balsaminaceae|Convolvulaceae|Proteaceae|Oleaceae|Polygonaceae	10	Vitales|Sapindales|Gentianales|Asterales|Myrtales|Ericales|Solanales|Proteales|Lamiales|Caryophyllales
Sphingidae	Macroglossinae	Macroglossini	Hippotion	Hippotion velox	6	Morinda|Ipomoea|Pisonia|Alocasia|Colocasia|Brassica	11	Morinda citrifolia|Ipomoea batatas|Pisonia aculeata|Pisonia grandis|Pisonia morindifolia|Pisonia umbellifera|Alocasia indica|Colocasia|Brassica|Pisonia|Pisonia sp.	5	Araceae|Brassicaceae|Convolvulaceae|Rubiaceae|Nyctaginaceae	5	Alismatales|Brassicales|Solanales|Gentianales|Caryophyllales
Sphingidae	Sphinginae	Australian Sphingulini	Hopliocnema	Hopliocnema brachycera	3	Bontia|Eremophila|Casuarina	4	Bontia willsii|Eremophila exotrachys|Eremophila willsii|Casuarina sp.	2	Scrophulariaceae|Casuarinaceae	2	Lamiales|Fagales
Sphingidae	Sphinginae	Sphingini	Hoplistopus	Hoplistopus penricei	1	Catophractes	1	Catophractes alexandri	1	Bignoniaceae	1	Lamiales
Sphingidae	Macroglossinae	Macroglossini	Hyles		1	Euphorbia	3	Euphorbia sp.|Euphorbia paralais|Euphorbia characias	1	Euphorbiaceae	1	Malpighiales	1	Euphorbia	1	Euphorbia cyparissias	1	Euphorbiaceae	1	Malpighiales
Sphingidae	Macroglossinae	Macroglossini	Hyles	Hyles annei	5	Solanum|Boerhavia|Mirabilis|Polygonum|Vitis	8	Solanum tuberosum|Boerhavia|Boerhavia coccinea|Mirabilis viscosa|Polygonum hydropiperoides|Vitis vinifera|Boerhavia hirsuta|Polygonum persecaroides	4	Nyctaginaceae|Polygonaceae|Solanaceae|Vitaceae	3	Caryophyllales|Solanales|Vitales	5	Galium|Euphorbia|Epilobium|Fuchsia|Vitis	5	Galium|Euphorbia hirta|Epilobium|Fuchsia|Vitis	4	Onagraceae|Euphorbiaceae|Rubiaceae|Vitaceae	4	Myrtales|Malpighiales|Gentianales|Vitales
Sphingidae	Macroglossinae	Macroglossini	Hyles	Hyles apocyni	1	Apocynum	2	Apocynum scabrum|Apocynum venetum	1	Apocynaceae	1	Gentianales
Sphingidae	Macroglossinae	Macroglossini	Hyles	Hyles biguttata	3	Agarista|Tachiadenus|Satanocrater	4	Agarista buxifolia|Agarista salicifolia|Tachiadenus|Satanocrater	3	Ericaceae|Acanthaceae|Gentianaceae	3	Ericales|Lamiales|Gentianales
Sphingidae	Macroglossinae	Macroglossini	Hyles	Hyles calida	10	Scaevola|Bobea|Canthium|Coprosma|Gardenia|Psychotria|Acacia|Metrosideros|Melicope|Pelea	14	Scaevola chamissoniana|Scaevola gaudichaudiana|Bobea elatior|Canthium sp.|Coprosma sp.|Acacia koa|Melicope sp.|Bobea sp.|Metrosideros sp.|Pelea sp.|Psychotria sp.|Coprosma sp.|Gardenia sp.|Scaevola sp.	5	Fabaceae|Rubiaceae|Rutaceae|Myrtaceae|Goodeniaceae	5	Fabales|Gentianales|Sapindales|Myrtales|Asterales
[truncated: 460 more rows]
