# Supplementary material for: A global food plant dataset for wild silkmoths and hawkmoths and its use in documenting polyphagy of their caterpillars (Lepidoptera: Bombycoidea: Saturniidae, Sphingidae)
Source: Biodivers Data J. 2020 Dec 10;8:e60027. doi: 10.3897/BDJ.8.e60027 (PMC7746661; doi:10.3897/BDJ.8.e60027)
Supplement: Supplementary material 2 — Polyphagy variables and score for Saturniidae and Sphingidae [file bdj-08-e60027-s002.xlsx]

## Sheet: Description
Column Name	Description
Family	Taxonomic family of the moth genus
Subfamily	Taxonomic subfamily of the moth genus
Tribe	Taxonomic tribe of the moth genus
Moth_Genus_Name	Genus name
NumberSampledMothSpecies	Number of moth species within the genus that have food plant information available
TotalMothSpecies	Total number of moth species within the genus
TotalNumberGenus	Total number of plant genera known to be eaten in natural environment by caterpillars of this genus of moth
AverageNumberGenus	The average number of plant genera known to be eaten in natural environments by species within this genus of moth
TotalNumberFamilies	Total number of plant families known to be eaten in natural environments by caterpillars of this genus of moth
AverageNumberFamilies	The average number of plant families known to be eaten in natural environments by species within this genus of moth
TotalNumberOrders	Total number of plant orders known to be eaten in natural environments by caterpillars of this genus of moth
AverageNumberOrders	The average number of plant orders known to be eaten in natural environments by species within this genus of moth
PD_score	Phylogenetic score based on the total branch length in the phylogenetic tree connecting the different families of plant eaten by a given moth species and summarized by genus. NOTE: Only computed from records of plant species eaten in natural environments; records on Gymnosperms were dicarded prior calculation (see text).

## Sheet: Polyphagy_scores
Family	Subfamily	Tribe	Moth_Genus_Name	NumberMothSpecies	TotalNumberGenus	AverageNumberGenus	TotalNumberFamilies	AverageNumberFamilies	TotalNumberOrders	AverageNumberOrders	PD_score
Saturniidae	Agliinae		Aglia	3	17	8	7	4.5	5	2.66667	427.09
Saturniidae	Arsenurinae	Almeidaiini	Almeidaia	1	2	2	1	1	1	1	139.4
Saturniidae	Arsenurinae	Arsenurini	Arsenura	13	32	6.75	9	2.5	9	2.5	262.54
Saturniidae	Arsenurinae	Arsenurini	Caio	5	3	1.5	1	1	1	1	139.4
Saturniidae	Arsenurinae	Arsenurini	Dysdaemonia	3	2	1	1	1	1	1	139.4
Saturniidae	Arsenurinae	Arsenurini	Paradaemonia	2	3	1.5	2	1	2	1	139.4
Saturniidae	Arsenurinae	Arsenurini	Rhescyntis	2	2	1.5	1	1	1	1	139.4
Saturniidae	Arsenurinae	Arsenurini	Titaea	3	4	2	1	1	1	1	139.4
Saturniidae	Ceratocampinae		Adeloneivaia	10	8	2.66667	1	1	1	1	139.4
Saturniidae	Ceratocampinae		Adelowalkeria	2	4	2.5	1	1	1	1	139.4
Saturniidae	Ceratocampinae		Anisota	11	17	6	11	4.2	8	3	343.66
Saturniidae	Ceratocampinae		Citheronia	17	56	8.66667	31	7.25	20	5.14286	777.54
Saturniidae	Ceratocampinae		Citheronioides	2	23	16	16	12	9	8	1264.09
Saturniidae	Ceratocampinae		Citheronula	1	0	1	0	1	0	1	NA
Saturniidae	Ceratocampinae		Citioica	1	1	1	1	1	1	1	139.4
Saturniidae	Ceratocampinae		Dryocampa	1	3	3	3	3	3	3	369.12
Saturniidae	Ceratocampinae		Eacles	8	125	26.6	47	11.6	23	7	1019.07
Saturniidae	Ceratocampinae		Giacomellia	1	2	2	1	1	1	1	139.4
Saturniidae	Ceratocampinae		Megaceresa	1	0	1	0	1	0	1	NA
Saturniidae	Ceratocampinae		Neorcarnegia	1	3	3	1	1	1	1	139.4
Saturniidae	Ceratocampinae		Oiticella	1	1	1	1	1	1	1	139.4
Saturniidae	Ceratocampinae		Othorene	5	8	2.5	6	2	5	1.5	206.63
Saturniidae	Ceratocampinae		Procitheronia	1	1	1	1	1	1	1	139.4
Saturniidae	Ceratocampinae		Psilopygida	2	4	2	1	1	1	1	139.4
Saturniidae	Ceratocampinae		Ptiloscola	1	4	4	1	1	1	1	139.4
Saturniidae	Ceratocampinae		Schausiella	3	2	1.5	1	1	1	1	139.4
Saturniidae	Ceratocampinae		Scolesa	1	1	1	1	1	1	1	139.4
Saturniidae	Ceratocampinae		Syssphinx	18	36	6.57143	7	3	6	2.66667	191.78
Saturniidae	Cercophaninae	Cercophanini	Cercophana	2	4	2	3	1.5	3	1.5	195.41
Saturniidae	Cercophaninae	Cercophanini	Microdulia	1	1	1	1	1	1	1	139.4
Saturniidae	Cercophaninae	Cercophanini	Neocercophana	1	1	1	1	1	1	1	139.4
Saturniidae	Hemileucinae	Hemileucini	Adetomeris	1	1	1	1	1	1	1	139.4
Saturniidae	Hemileucinae	Hemileucini	Automerella	1	0	1	0	1	0	1	NA
Saturniidae	Hemileucinae	Hemileucini	Automerina	3	1	1	1	1	1	1	139.4
Saturniidae	Hemileucinae	Hemileucini	Automeris	74	394	39.6667	105	20.5417	40	12.4737	1254.52
Saturniidae	Hemileucinae	Hemileucini	Automeropsis	1	1	1	1	1	1	1	139.4
Saturniidae	Hemileucinae	Hemileucini	Callodirphia	1	3	3	2	2	2	2	263.13
Saturniidae	Hemileucinae	Hemileucini	Cerodirphia	5	9	3.5	8	3.5	7	3	261.35
Saturniidae	Hemileucinae	Hemileucini	Coloradia	4	1	1	1	1	1	1	NA
Saturniidae	Hemileucinae	Hemileucini	Dirphia	18	38	6.14286	19	4.33333	11	3	388.3
Saturniidae	Hemileucinae	Hemileucini	Dirphiopsis	7	11	3.66667	10	3.66667	9	3.66667	378.6
Saturniidae	Hemileucinae	Hemileucini	Eubergia	1	3	3	2	2	2	2	275.15
Saturniidae	Hemileucinae	Hemileucini	Eudyaria	2	1	1	1	1	1	1	139.4
Saturniidae	Hemileucinae	Hemileucini	Gamelia	3	84	42	36	18.5	20	10.5	1903.83
Saturniidae	Hemileucinae	Hemileucini	Hemileuca	26	74	8.90909	28	5.5	18	4.875	395.91
Saturniidae	Hemileucinae	Hemileucini	Hylesia	29	211	22.3125	70	13	29	8.18182	842.08
Saturniidae	Hemileucinae	Hemileucini	Hyperchiria	3	30	11.3333	13	5.66667	10	5	685.24
Saturniidae	Hemileucinae	Hemileucini	Ithomisa	3	3	1.5	3	1.5	3	1.5	201.26
Saturniidae	Hemileucinae	Hemileucini	Leucanella	13	43	6.83333	27	5.66667	17	4.83333	478.74
Saturniidae	Hemileucinae	Hemileucini	Lonomia	8	53	10.25	29	8.125	14	6	937.45
Saturniidae	Hemileucinae	Hemileucini	Loxolomia	1	1	1	1	1	1	1	139.4
Saturniidae	Hemileucinae	Hemileucini	Molippa	6	30	7.4	11	2.33333	7	2	359.84
Saturniidae	Hemileucinae	Hemileucini	Ormiscodes	6	7	2.5	6	2	5	2	223.29
Saturniidae	Hemileucinae	Hemileucini	Paradirphia	4	5	3	3	2	3	2	381.71
Saturniidae	Hemileucinae	Hemileucini	Periga	6	13	3	12	3	9	3	346.55
Saturniidae	Hemileucinae	Hemileucini	Periphoba	4	123	43.6667	49	20	21	10.3333	2031.34
Saturniidae	Hemileucinae	Hemileucini	Pseudautomeris	9	29	5.2	21	4.8	14	4	388.46
Saturniidae	Hemileucinae	Hemileucini	Pseudodirphia	5	23	6	14	3.75	13	3	405.58
Saturniidae	Hemileucinae	Hemileucini	Travassosula	1	1	1	1	1	1	1	139.4
Saturniidae	Hemileucinae	Polythysanini	Polythysana	3	3	2	3	2	3	2	269.22
Saturniidae	Hemileucinae		Heliconisa	1	2	2	2	2	2	2	275.15
Saturniidae	Oxyteninae		Homoeopteryx	1	1	1	1	1	1	1	139.4
Saturniidae	Oxyteninae		Oxytenis	10	26	5.4	4	1.5	4	1.5	154.86
Saturniidae	Oxyteninae		Therinia	2	10	5.5	1	1	1	1	139.4
Saturniidae	Salassinae		Salassa	6	7	2	7	2	5	1.5	292.39
Saturniidae	Saturniinae	Attacini	Archaeoattacus	2	9	5	8	4.5	7	4	957.73
Saturniidae	Saturniinae	Attacini	Attacus	15	129	22.7143	59	13.7143	24	8.14286	1138.7
Saturniidae	Saturniinae	Attacini	Callosamia	3	28	11.3333	20	11	15	9	902.91
Saturniidae	Saturniinae	Attacini	Coscinocera	1	5	5	5	5	4	4	588.26
Saturniidae	Saturniinae	Attacini	Epiphora	9	13	2.66667	8	2.66667	4	2	293.92
Saturniidae	Saturniinae	Attacini	Eupackardia	1	9	9	7	7	4	4	720.61
Saturniidae	Saturniinae	Attacini	Hyalophora	4	66	27.5	29	15.6667	18	10	1708.24
Saturniidae	Saturniinae	Attacini	Rothschildia	23	96	14.75	42	7.9	20	6.66667	718.35
Saturniidae	Saturniinae	Attacini	Samia	12	95	15.625	51	11.25	25	8.28571	1026.79
Saturniidae	Saturniinae	Bunaeini	Athletes	4	7	2.5	3	1.5	3	1.5	169.04
Saturniidae	Saturniinae	Bunaeini	Aurivillius	3	4	2.5	1	1	1	1	139.4
Saturniidae	Saturniinae	Bunaeini	Bunaea	2	35	17.5	23	12.5	17	9.5	1379.11
Saturniidae	Saturniinae	Bunaeini	Bunaeopsis	7	14	3	8	2.33333	5	2.33333	273.2
Saturniidae	Saturniinae	Bunaeini	Cinabra	1	6	6	4	4	4	4	512.03
Saturniidae	Saturniinae	Bunaeini	Cirina	2	29	15	11	6	7	4	657.18
Saturniidae	Saturniinae	Bunaeini	Eochroa	1	1	1	1	1	1	1	139.4
Saturniidae	Saturniinae	Bunaeini	Gonimbrasia	33	124	10.6154	53	7.45455	24	6.81818	611.04
Saturniidae	Saturniinae	Bunaeini	Gynanisa	4	15	6.33333	7	3	7	3	319.32
Saturniidae	Saturniinae	Bunaeini	Heniocha	4	3	1.5	2	1.5	2	1.5	169.04
Saturniidae	Saturniinae	Bunaeini	Imbrasia	6	23	7.75	11	4.5	6	3.75	444.36
Saturniidae	Saturniinae	Bunaeini	Leucopteryx	1	1	1	1	1	1	1	139.4
Saturniidae	Saturniinae	Bunaeini	Lobobunaea	5	21	6.66667	14	5	11	4.66667	579.26
Saturniidae	Saturniinae	Bunaeini	Melanocera	4	5	3	3	2	3	2	196.52
Saturniidae	Saturniinae	Bunaeini	Meroleuca	1	1	1	1	1	1	1	139.4
Saturniidae	Saturniinae	Bunaeini	Pseudimbrasia	1	3	3	2	2	2	2	255.18
Saturniidae	Saturniinae	Bunaeini	Pseudobunaea	8	28	6.6	19	6	13	5.66667	632.86
Saturniidae	Saturniinae	Bunaeini	Rohaniella	1	2	2	2	2	2	2	252.1
Saturniidae	Saturniinae	Micragonini	Adafroptilum	1	2	2	1	1	1	1	139.4
Saturniidae	Saturniinae	Micragonini	Adrougeriana	2	2	1.5	1	1	1	1	139.4
Saturniidae	Saturniinae	Micragonini	Basquiniana	1	2	2	2	2	2	2	255.77
Saturniidae	Saturniinae	Micragonini	Campimoptilum	1	8	8	2	2	2	2	257.97
Saturniidae	Saturniinae	Micragonini	Carnegia	1	1	1	1	1	1	1	139.4
Saturniidae	Saturniinae	Micragonini	Cyrtogone	3	3	1.5	2	1	2	1	139.4
Saturniidae	Saturniinae	Micragonini	Decachorda	2	2	1	1	1	1	1	139.4
Saturniidae	Saturniinae	Micragonini	Dogoia	1	2	2	2	2	2	2	275.15
Saturniidae	Saturniinae	Micragonini	Goodia	2	1	1	1	1	1	1	139.4
Saturniidae	Saturniinae	Micragonini	Holocerina	5	25	7	18	5.25	12	3.66667	570.82
Saturniidae	Saturniinae	Micragonini	Ludia	5	15	5.33333	3	2	3	2	206.84
Saturniidae	Saturniinae	Micragonini	Micragone	2	4	2	2	1	2	1	139.4
Saturniidae	Saturniinae	Micragonini	Vegetia	1	2	2	2	2	2	2	263.13
Saturniidae	Saturniinae	Saturniini	Actias	19	82	14.1	45	10.125	22	7.22222	936.7
Saturniidae	Saturniinae	Saturniini	Agapema	6	38	10	26	7.5	16	5.5	658.27
Saturniidae	Saturniinae	Saturniini	Antheraea	38	119	15.0909	55	11.3	23	6.85714	641.86
Saturniidae	Saturniinae	Saturniini	Antherina	1	16	16	11	11	9	9	1235.06
Saturniidae	Saturniinae	Saturniini	Argema	2	9	4.5	8	4	6	3.5	458.56
Saturniidae	Saturniinae	Saturniini	Austrocaligula	5	19	7	13	5	10	4.33333	391.93
Saturniidae	Saturniinae	Saturniini	Cachosaturnia	2	1	1	1	1	1	1	139.4
Saturniidae	Saturniinae	Saturniini	Calosaturnia	2	3	2	2	1.5	2	1.5	201.26
Saturniidae	Saturniinae	Saturniini	Ceranchia	1	1	1	1	1	1	1	139.4
Saturniidae	Saturniinae	Saturniini	Copaxa	39	14	3.66667	6	1.5	5	1.5	157.93
Saturniidae	Saturniinae	Saturniini	Copiopteryx	3	4	2	2	1.5	2	1.5	200.09
Saturniidae	Saturniinae	Saturniini	Cricula	7	37	10.5	22	8.33333	15	6	775.67
Saturniidae	Saturniinae	Saturniini	Lemaireia	3	3	2	2	1.5	2	1.5	263.13
Saturniidae	Saturniinae	Saturniini	Loepa	13	19	3.8	11	3.25	9	2.66667	326.5
Saturniidae	Saturniinae	Saturniini	Neodiphthera	3	3	1	3	1	3	1	139.4
Saturniidae	Saturniinae	Saturniini	Neoris	5	18	6.25	12	4.25	8	3.66667	389.06
Saturniidae	Saturniinae	Saturniini	Perisomena	1	10	10	7	7	5	5	805.48
Saturniidae	Saturniinae	Saturniini	Rhodinia	7	16	4.5	10	3.25	5	2.5	405.74
Saturniidae	Saturniinae	Saturniini	Rinaca	14	36	6.71429	24	5.42857	14	4.4	468.89
Saturniidae	Saturniinae	Saturniini	Saturnia	11	96	17.4444	47	13.1667	23	9.4	1100.54
Saturniidae	Saturniinae	Saturniini	Solus	1	3	3	2	2	1	1	238.36
Saturniidae	Saturniinae	Saturniini	Syntherata	7	31	7.4	18	5.33333	12	3.6	615.35
Saturniidae	Saturniinae	Urotini	Eudaemonia	2	2	1	1	1	1	1	139.4
Saturniidae	Saturniinae	Urotini	Maltagorea	2	5	3	5	3	5	3	376.63
Saturniidae	Saturniinae	Urotini	Pselaphelia	2	2	1.5	2	1.5	2	1.5	207.27
Saturniidae	Saturniinae	Urotini	Pseudantheraea	1	3	3	3	3	3	3	373.76
Saturniidae	Saturniinae	Urotini	Pseudaphelia	1	1	1	1	1	1	1	139.4
Saturniidae	Saturniinae	Urotini	Tagoropsiella	1	1	1	1	1	1	1	139.4
Saturniidae	Saturniinae	Urotini	Tagoropsis	2	1	1	1	1	1	1	139.4
Saturniidae	Saturniinae	Urotini	Urota	1	3	3	3	3	3	3	374.35
Saturniidae	Saturniinae	Urotini	Usta	2	5	3	4	2.5	2	1.5	264.42
Saturniidae	Saturniinae		Opodiphthera	2	8	4	7	3.5	6	3	359.26
Sphingidae	Langiinae		Langia	1	5	5	2	2	2	2	250.54
Sphingidae	Macroglossinae	Dilophonotini	Aellopos	5	14	4	3	1.5	3	1.5	182.09
Sphingidae	Macroglossinae	Dilophonotini	Aleuron	4	5	3.5	2	1.5	2	1.5	170.04
Sphingidae	Macroglossinae	Dilophonotini	Amphion	1	8	8	3	3	3	3	377.06
Sphingidae	Macroglossinae	Dilophonotini	Callionima	7	6	2	2	1.5	2	1.5	153.71
Sphingidae	Macroglossinae	Dilophonotini	Cautethia	4	5	2.66667	1	1	1	1	139.4
Sphingidae	Macroglossinae	Dilophonotini	Enyo	5	16	5.8	7	3	7	3	333.65
Sphingidae	Macroglossinae	Dilophonotini	Erinnyis	8	63	14.3333	16	5.25	13	4.5	492.06
Sphingidae	Macroglossinae	Dilophonotini	Eumorpha	15	20	5.25	9	2.5	7	2.5	250.46
Sphingidae	Macroglossinae	Dilophonotini	Euproserpinus	3	3	2	2	1.5	2	1.5	180.64
Sphingidae	Macroglossinae	Dilophonotini	Eupyrrhoglossum	1	6	6	1	1	1	1	139.4
Sphingidae	Macroglossinae	Dilophonotini	Hemeroplanes	3	11	6.33333	1	1	1	1	139.4
Sphingidae	Macroglossinae	Dilophonotini	Isognathus	9	7	2.5	3	1.5	3	1.5	194.39
Sphingidae	Macroglossinae	Dilophonotini	Kloneus	1	5	5	1	1	1	1	139.4
Sphingidae	Macroglossinae	Dilophonotini	Madoryx	4	14	3.75	7	2	4	1.5	227.99
Sphingidae	Macroglossinae	Dilophonotini	Nyceryx	9	17	2.75	3	1	2	1	139.4
Sphingidae	Macroglossinae	Dilophonotini	Oryba	2	6	3	2	1.5	2	1.5	199.33
Sphingidae	Macroglossinae	Dilophonotini	Pachygonidia	4	7	2	4	1	4	1	139.4
Sphingidae	Macroglossinae	Dilophonotini	Pachylia	3	16	7.66667	5	3	3	2	340.07
Sphingidae	Macroglossinae	Dilophonotini	Pachylioides	1	9	9	2	2	2	2	263.13
Sphingidae	Macroglossinae	Dilophonotini	Perigonia	5	18	5.25	3	2	3	2	182.09
Sphingidae	Macroglossinae	Dilophonotini	Phryxus	1	6	6	2	2	2	2	263.13
Sphingidae	Macroglossinae	Dilophonotini	Proserpinus	8	12	3	4	1.5	3	1.5	163.3
Sphingidae	Macroglossinae	Dilophonotini	Pseudosphinx	1	9	9	2	2	2	2	263.13
Sphingidae	Macroglossinae	Dilophonotini	Sphecodina	2	3	3	1	1	1	1	139.4
Sphingidae	Macroglossinae	Dilophonotini	Stolidoptera	1	1	1	1	1	1	1	139.4
Sphingidae	Macroglossinae	Dilophonotini	Unzela	2	5	4.5	2	1.5	2	1.5	200.69
Sphingidae	Macroglossinae	Hemarini	Cephonodes	10	55	10.125	14	4.25	9	3.5	309.18
Sphingidae	Macroglossinae	Hemarini	Hemaris	14	29	6.14286	9	3	7	2.5	270.9
Sphingidae	Macroglossinae	Macroglossini	Acosmerycoides	1	2	2	1	1	1	1	139.4
Sphingidae	Macroglossinae	Macroglossini	Acosmeryx	11	13	4.28571	4	2	4	2	239.69
Sphingidae	Macroglossinae	Macroglossini	Ampelophaga	2	7	4.5	3	2.5	3	2.5	320.41
Sphingidae	Macroglossinae	Macroglossini	Angonyx	2	1	1	1	1	1	1	139.4
Sphingidae	Macroglossinae	Macroglossini	Antinephele	2	2	1.5	1	1	1	1	139.4
Sphingidae	Macroglossinae	Macroglossini	Atemnora	1	4	4	3	3	2	2	330.86
Sphingidae	Macroglossinae	Macroglossini	Basiothia	4	16	5.33333	8	2.66667	7	2	301.56
Sphingidae	Macroglossinae	Macroglossini	Cechenena	4	3	1	2	1	2	1	139.4
Sphingidae	Macroglossinae	Macroglossini	Cechetra	5	10	4.25	5	3	4	2.5	309.45
Sphingidae	Macroglossinae	Macroglossini	Centroctena	2	6	3.5	2	2	2	1.5	201.26
Sphingidae	Macroglossinae	Macroglossini	Cizara	2	10	5	4	2.5	4	2.5	311.3
Sphingidae	Macroglossinae	Macroglossini	Clarina	2	3	2.5	1	1	1	1	139.4
Sphingidae	Macroglossinae	Macroglossini	Dahira	2	2	1	2	1	2	1	139.4
Sphingidae	Macroglossinae	Macroglossini	Daphnis	7	71	14.6667	18	5.6	13	4.75	459.8
Sphingidae	Macroglossinae	Macroglossini	Darapsa	3	13	5.5	9	3.5	7	3.5	442.11
Sphingidae	Macroglossinae	Macroglossini	Deidamia	1	4	4	2	2	2	2	263.13
Sphingidae	Macroglossinae	Macroglossini	Deilephila	4	42	13.75	22	8.25	16	6.75	927.15
Sphingidae	Macroglossinae	Macroglossini	Elibia	1	6	6	2	2	2	2	263.13
Sphingidae	Macroglossinae	Macroglossini	Enpinanga	3	2	1.5	1	1	1	1	139.4
Sphingidae	Macroglossinae	Macroglossini	Euchloron	1	5	5	1	1	1	1	139.4
Sphingidae	Macroglossinae	Macroglossini	Eupanacra	14	20	5.16667	4	1.5	4	1.5	162.02
Sphingidae	Macroglossinae	Macroglossini	Eurypteryx	1	1	1	1	1	1	1	139.4
Sphingidae	Macroglossinae	Macroglossini	Gnathothlibus	3	16	11	9	6.5	8	6.5	763.32
Sphingidae	Macroglossinae	Macroglossini	Hayesiana	1	1	1	1	1	1	1	139.4
Sphingidae	Macroglossinae	Macroglossini	Hippotion	18	114	17.6667	41	9.18182	24	7	759.11
Sphingidae	Macroglossinae	Macroglossini	Hyles	26	140	12.9091	51	11.1	26	8.55556	731.16
Sphingidae	Macroglossinae	Macroglossini	Hypaedalea	2	3	1.5	1	1	1	1	139.4
Sphingidae	Macroglossinae	Macroglossini	Leucostrophus	2	1	1	1	1	1	1	139.4
Sphingidae	Macroglossinae	Macroglossini	Macroglossum	40	48	4.5	16	2.5	13	2.5	180.52
Sphingidae	Macroglossinae	Macroglossini	Macropoliana	3	6	2.33333	5	2	3	1.5	234.23
Sphingidae	Macroglossinae	Macroglossini	Micracosmeryx	1	1	1	1	1	1	1	139.4
Sphingidae	Macroglossinae	Macroglossini	Microsphinx	1	1	1	1	1	1	1	139.4
Sphingidae	Macroglossinae	Macroglossini	Neogurelca	6	8	3	3	1.5	3	1.5	174.34
Sphingidae	Macroglossinae	Macroglossini	Nephele	15	24	4.66667	4	2	3	2	168.57
Sphingidae	Macroglossinae	Macroglossini	Odontosida	2	3	1.5	2	1	2	1	139.4
Sphingidae	Macroglossinae	Macroglossini	Pergesa	1	21	21	5	6	5	5	645.82
Sphingidae	Macroglossinae	Macroglossini	Pseudenyo	1	1	1	1	1	1	1	139.4
Sphingidae	Macroglossinae	Macroglossini	Rethera	1	2	2	1	1	1	1	139.4
Sphingidae	Macroglossinae	Macroglossini	Rhagastis	12	18	4.8	10	4	9	4	323.64
Sphingidae	Macroglossinae	Macroglossini	Rhodafra	2	1	1	1	1	1	1	139.4
Sphingidae	Macroglossinae	Macroglossini	Sphingonaepiopsis	5	8	3.66667	1	1	1	1	139.4
Sphingidae	Macroglossinae	Macroglossini	Temnora	23	13	2.5	7	2.5	6	2.33333	182.81
Sphingidae	Macroglossinae	Macroglossini	Theretra	23	90	12.8462	41	8.7	25	8	582.49
Sphingidae	Macroglossinae	Macroglossini	Xylophanes	34	45	8.44444	17	4	10	3.5	194.57
Sphingidae	Smerinthinae	Ambulycini	Adhemarius	5	5	3	1	1	1	1	139.4
Sphingidae	Smerinthinae	Ambulycini	Akbesia	1	1	1	1	1	1	1	139.4
Sphingidae	Smerinthinae	Ambulycini	Ambulyx	19	35	6.125	17	4.16667	10	3	288.9
Sphingidae	Smerinthinae	Ambulycini	Amplypterus	1	7	7	4	4	3	3	464.48
Sphingidae	Smerinthinae	Ambulycini	Batocnema	2	3	1.5	1	1	1	1	139.4
Sphingidae	Smerinthinae	Ambulycini	Compsulyx	1	1	1	1	1	1	1	139.4
Sphingidae	Smerinthinae	Ambulycini	Orecta	2	3	2	1	1	1	1	139.4
Sphingidae	Smerinthinae	Ambulycini	Protambulyx	2	13	7	5	3	3	2	326.29
Sphingidae	Smerinthinae	Cypa Genus-Group	Cypa	5	7	1.5	3	1.5	2	1	178.55
Sphingidae	Smerinthinae	Cypa Genus-Group	Cypoides	1	4	4	4	4	3	3	471.91
Sphingidae	Smerinthinae	Cypa Genus-Group	Rhodambulyx	1	1	1	1	1	1	1	139.4
Sphingidae	Smerinthinae	Cypa Genus-Group	Rhodoprasina	2	3	1.5	2	1	2	1	139.4
Sphingidae	Smerinthinae	Cypa Genus-Group	Smerinthulus	4	4	1.5	2	1	2	1	139.4
Sphingidae	Smerinthinae	Incertae Sedis	Agnosia	2	2	1	2	1	2	1	139.4
Sphingidae	Smerinthinae	Incertae Sedis	Callambulyx	4	11	4.5	7	3.25	5	2.66667	461.46
Sphingidae	Smerinthinae	Incertae Sedis	Coequosa	2	7	4.5	2	2	2	2	269.72
Sphingidae	Smerinthinae	Incertae Sedis	Craspedortha	1	2	2	2	2	2	2	263.13
Sphingidae	Smerinthinae	Incertae Sedis	Falcatula	1	2	2	2	2	2	2	257.97
Sphingidae	Smerinthinae	Incertae Sedis	Imber	1	2	2	1	1	1	1	139.4
Sphingidae	Smerinthinae	Incertae Sedis	Lophostethus	2	7	4	3	2	3	2	381.71
Sphingidae	Smerinthinae	Incertae Sedis	Oplerclanis	2	4	2	2	1	2	1	139.4
Sphingidae	Smerinthinae	Incertae Sedis	Parum	1	3	3	1	1	1	1	139.4
Sphingidae	Smerinthinae	Incertae Sedis	Platysphinx	5	11	4.2	2	1.5	2	1.5	168.34
Sphingidae	Smerinthinae	Incertae Sedis	Rufoclanis	2	3	1.5	1	1	1	1	139.4
Sphingidae	Smerinthinae	Leucophlebiini	Afroclanis	1	1	1	1	1	1	1	139.4
Sphingidae	Smerinthinae	Leucophlebiini	Clanidopsis	1	3	3	3	3	3	3	373.76
Sphingidae	Smerinthinae	Leucophlebiini	Clanis	6	15	6.5	1	1	1	1	139.4
Sphingidae	Smerinthinae	Leucophlebiini	Leptoclanis	1	2	2	2	2	2	2	252.1
Sphingidae	Smerinthinae	Leucophlebiini	Leucophlebia	3	6	2.5	1	1	1	1	139.4
Sphingidae	Smerinthinae	Leucophlebiini	Phylloxiphia	5	5	1.5	3	1.5	3	1.5	161.94
Sphingidae	Smerinthinae	Leucophlebiini	Pseudandriasa	1	1	1	1	1	1	1	139.4
Sphingidae	Smerinthinae	Leucophlebiini	Pseudopolyptychus	1	4	4	2	2	2	2	263.13
Sphingidae	Smerinthinae	Leucophlebiini	Rhadinopasa	1	3	3	3	3	3	3	393.89
Sphingidae	Smerinthinae	Mimatini	Amorpha	1	7	7	3	3	1	1	327.92
Sphingidae	Smerinthinae	Mimatini	Mimas	2	23	15.5	13	9.5	7	6	1008.92
Sphingidae	Smerinthinae	Mimatini	Phyllosphingia	1	2	2	1	1	1	1	139.4
Sphingidae	Smerinthinae	Polyptychus Genus-Group	Andriasa	1	8	8	6	6	3	3	577.75
Sphingidae	Smerinthinae	Polyptychus Genus-Group	Chloroclanis	1	3	3	2	2	1	1	218.57
Sphingidae	Smerinthinae	Polyptychus Genus-Group	Neopolyptychus	6	9	3.5	5	2.5	5	2.5	256.92
Sphingidae	Smerinthinae	Polyptychus Genus-Group	Polyptychus	16	24	3.6	13	2.75	7	2	218.7
Sphingidae	Smerinthinae	Polyptychus Genus-Group	Pseudoclanis	5	19	5.75	9	3.75	6	2.66667	350.73
Sphingidae	Smerinthinae	Sataspedini	Sataspes	4	5	2.75	1	1	1	1	139.4
Sphingidae	Smerinthinae	Sichiini	Daphnusa	3	3	1.5	3	1.5	2	1.5	208.9
Sphingidae	Smerinthinae	Sichiini	Likoma	1	3	3	1	1	1	1	139.4
Sphingidae	Smerinthinae	Sichiini	Marumba	15	42	6.125	16	3	9	2.5	261.65
Sphingidae	Smerinthinae	Smerinthini	Laothoe	4	15	5.75	9	4.66667	6	3.66667	440.06
Sphingidae	Smerinthinae	Smerinthini	Pachysphinx	2	4	3	3	2	3	2	252.86
Sphingidae	Smerinthinae	Smerinthini	Paonias	4	30	10.25	12	4.75	10	4.25	706.48
Sphingidae	Smerinthinae	Smerinthini	Smerinthus	9	24	7	11	4.2	7	3.4	365.37
Sphingidae	Sphinginae	Australian Sphingulini	Coenotes	1	20	20	12	12	7	7	1078
Sphingidae	Sphinginae	Australian Sphingulini	Hopliocnema	1	3	3	2	2	2	2	263.13
Sphingidae	Sphinginae	Australian Sphingulini	Synoecha	1	1	1	1	1	1	1	139.4
Sphingidae	Sphinginae	Monardini	Monarda	1	2	2	1	1	1	1	139.4
Sphingidae	Sphinginae	Pentateuchini	Pentateucha	2	1	1	1	1	1	1	139.4
Sphingidae	Sphinginae	Sphingini	Acherontia	4	160	57	48	21.5	24	11.5	2397.77
Sphingidae	Sphinginae	Sphingini	Agrius	4	56	21	25	9.33333	16	6	755.25
Sphingidae	Sphinginae	Sphingini	Amphimoea	1	1	1	1	1	1	1	139.4
Sphingidae	Sphinginae	Sphingini	Apocalypsis	1	2	2	2	2	1	1	210.42
Sphingidae	Sphinginae	Sphingini	Ceratomia	5	15	4	8	3.33333	4	2	285.89
Sphingidae	Sphinginae	Sphingini	Cerberonoton	1	6	6	2	2	2	2	275.31
Sphingidae	Sphinginae	Sphingini	Cocytius	4	8	4.66667	1	1	1	1	139.4
Sphingidae	Sphinginae	Sphingini	Coelonia	3	42	15	18	7	8	3.33333	760.52
Sphingidae	Sphinginae	Sphingini	Dolba	1	6	6	6	6	6	6	707.88
Sphingidae	Sphinginae	Sphingini	Dolbogene	1	1	1	1	1	1	1	139.4
Sphingidae	Sphinginae	Sphingini	Dovania	1	1	1	1	1	1	1	139.4
Sphingidae	Sphinginae	Sphingini	Euryglottis	3	2	1	2	1	1	1	139.4
Sphingidae	Sphinginae	Sphingini	Hoplistopus	1	1	1	1	1	1	1	139.4
Sphingidae	Sphinginae	Sphingini	Isoparce	1	2	2	1	1	1	1	NA
Sphingidae	Sphinginae	Sphingini	Lapara	3	3	1.5	2	1.5	2	1.5	NA
Sphingidae	Sphinginae	Sphingini	Leucomonia	1	1	1	1	1	1	1	139.4
Sphingidae	Sphinginae	Sphingini	Lintneria	9	12	3	6	1.5	4	1.5	164.28
Sphingidae	Sphinginae	Sphingini	Litosphingia	1	1	1	1	1	1	1	139.4
Sphingidae	Sphinginae	Sphingini	Manduca	28	121	15.4615	34	7.625	19	5.5	315.03
Sphingidae	Sphinginae	Sphingini	Megacorma	1	3	3	2	2	1	1	210.42
Sphingidae	Sphinginae	Sphingini	Meganoton	1	2	2	2	2	1	1	185.38
Sphingidae	Sphinginae	Sphingini	Neococytius	1	8	8	3	3	3	3	407.7
Sphingidae	Sphinginae	Sphingini	Neogene	1	2	2	1	1	1	1	139.4
Sphingidae	Sphinginae	Sphingini	Notonagemia	1	5	5	3	3	3	3	403.01
Sphingidae	Sphinginae	Sphingini	Oligographa	1	3	3	1	1	1	1	139.4
Sphingidae	Sphinginae	Sphingini	Panogena	2	3	1.5	1	1	1	1	139.4
Sphingidae	Sphinginae	Sphingini	Pantophaea	1	1	1	1	1	1	1	139.4
Sphingidae	Sphinginae	Sphingini	Paratrea	1	7	7	4	4	3	3	423.9
Sphingidae	Sphinginae	Sphingini	Poliana	1	2	2	2	2	2	2	229.15
Sphingidae	Sphinginae	Sphingini	Praedora	2	1	1	1	1	1	1	139.4
Sphingidae	Sphinginae	Sphingini	Pseudodolbina	1	1	1	1	1	1	1	139.4
Sphingidae	Sphinginae	Sphingini	Psilogramma	15	65	18.2857	33	8.28571	16	5	488.66
Sphingidae	Sphinginae	Sphingini	Sagenosoma	1	1	1	1	1	1	1	139.4
Sphingidae	Sphinginae	Sphingini	Sphinx	23	76	9.61538	27	6.125	18	5.375	519.43
Sphingidae	Sphinginae	Sphingini	Thamnoecha	1	1	1	1	1	1	1	NA
Sphingidae	Sphinginae	Sphingini	Xanthopan	1	5	5	2	2	1	1	248.98
Sphingidae	Sphinginae	Sphingulini	Dolbina	7	7	3.6	2	1.5	2	1.5	154.35
Sphingidae	Sphinginae	Sphingulini	Kentrochrysalis	3	4	2.66667	1	1	1	1	139.4
Sphingidae	Sphinginae	Sphingulini	Sphingulus	1	0	1	0	1	0	1	NA
